# Supplementary material for: Geographical variation in Plasmodium vivax relapse
Source: Malar J. 2014 Apr 15;13:144. doi: 10.1186/1475-2875-13-144 (PMC4021508; doi:10.1186/1475-2875-13-144)
Supplement: Additional file 3: Table S2 — Individual-level relapse dataset used in analysis. [file 1475-2875-13-144-S3.xlsx]

## Sheet: RelapseIndividual181213_EX1
PatientID	Relapse	RelapseDay	FUPatient	PatTreat	TreatSummary	PatTreatSched	PatTotalDose	Location	Strain	GISID	Unique	RelapseID	PubYear	Reference	Subjects	Lat	Long	EcoZone	Phenotype	White	OldNew	TropTemp	LoverCoker
126_01	Yes	30	30	CQ	Chloroquine	600 mg d0 + 300 mg d1	900 mg	India	Wild - Dehli, India	P14	P14_126	126	1998	Adak et al, 1998	Outpatients	28.6376	77.2235	8	Frequent relapse + long latency	Frequent relapse + long latency, Old World	Old World	tropical	Old World, tropical
126_02	Yes	30	30	CQ	Chloroquine	600 mg d0 + 300 mg d1	900 mg	India	Wild - Dehli, India	P14	P14_126	126	1998	Adak et al, 1998	Outpatients	28.6376	77.2235	8	Frequent relapse + long latency	Frequent relapse + long latency, Old World	Old World	tropical	Old World, tropical
126_03	Yes	30	30	CQ	Chloroquine	600 mg d0 + 300 mg d1	900 mg	India	Wild - Dehli, India	P14	P14_126	126	1998	Adak et al, 1998	Outpatients	28.6376	77.2235	8	Frequent relapse + long latency	Frequent relapse + long latency, Old World	Old World	tropical	Old World, tropical
126_04	Yes	30	30	CQ	Chloroquine	600 mg d0 + 300 mg d1	900 mg	India	Wild - Dehli, India	P14	P14_126	126	1998	Adak et al, 1998	Outpatients	28.6376	77.2235	8	Frequent relapse + long latency	Frequent relapse + long latency, Old World	Old World	tropical	Old World, tropical
126_05	Yes	30	30	CQ	Chloroquine	600 mg d0 + 300 mg d1	900 mg	India	Wild - Dehli, India	P14	P14_126	126	1998	Adak et al, 1998	Outpatients	28.6376	77.2235	8	Frequent relapse + long latency	Frequent relapse + long latency, Old World	Old World	tropical	Old World, tropical
126_06	Yes	30	30	CQ	Chloroquine	600 mg d0 + 300 mg d1	900 mg	India	Wild - Dehli, India	P14	P14_126	126	1998	Adak et al, 1998	Outpatients	28.6376	77.2235	8	Frequent relapse + long latency	Frequent relapse + long latency, Old World	Old World	tropical	Old World, tropical
126_07	Yes	30	30	CQ	Chloroquine	600 mg d0 + 300 mg d1	900 mg	India	Wild - Dehli, India	P14	P14_126	126	1998	Adak et al, 1998	Outpatients	28.6376	77.2235	8	Frequent relapse + long latency	Frequent relapse + long latency, Old World	Old World	tropical	Old World, tropical
126_08	Yes	30	30	CQ	Chloroquine	600 mg d0 + 300 mg d1	900 mg	India	Wild - Dehli, India	P14	P14_126	126	1998	Adak et al, 1998	Outpatients	28.6376	77.2235	8	Frequent relapse + long latency	Frequent relapse + long latency, Old World	Old World	tropical	Old World, tropical
126_09	Yes	30	30	CQ	Chloroquine	600 mg d0 + 300 mg d1	900 mg	India	Wild - Dehli, India	P14	P14_126	126	1998	Adak et al, 1998	Outpatients	28.6376	77.2235	8	Frequent relapse + long latency	Frequent relapse + long latency, Old World	Old World	tropical	Old World, tropical
126_10	Yes	30	30	CQ	Chloroquine	600 mg d0 + 300 mg d1	900 mg	India	Wild - Dehli, India	P14	P14_126	126	1998	Adak et al, 1998	Outpatients	28.6376	77.2235	8	Frequent relapse + long latency	Frequent relapse + long latency, Old World	Old World	tropical	Old World, tropical
126_100	Yes	60	60	CQ	Chloroquine	600 mg d0 + 300 mg d1	900 mg	India	Wild - Dehli, India	P14	P14_126	126	1998	Adak et al, 1998	Outpatients	28.6376	77.2235	8	Frequent relapse + long latency	Frequent relapse + long latency, Old World	Old World	tropical	Old World, tropical
126_1000	No	NA	360	CQ	Chloroquine	600 mg d0 + 300 mg d1	900 mg	India	Wild - Dehli, India	P14	P14_126	126	1998	Adak et al, 1998	Outpatients	28.6376	77.2235	8	Frequent relapse + long latency	Frequent relapse + long latency, Old World	Old World	tropical	Old World, tropical
126_1001	No	NA	360	CQ	Chloroquine	600 mg d0 + 300 mg d1	900 mg	India	Wild - Dehli, India	P14	P14_126	126	1998	Adak et al, 1998	Outpatients	28.6376	77.2235	8	Frequent relapse + long latency	Frequent relapse + long latency, Old World	Old World	tropical	Old World, tropical
126_1002	No	NA	360	CQ	Chloroquine	600 mg d0 + 300 mg d1	900 mg	India	Wild - Dehli, India	P14	P14_126	126	1998	Adak et al, 1998	Outpatients	28.6376	77.2235	8	Frequent relapse + long latency	Frequent relapse + long latency, Old World	Old World	tropical	Old World, tropical
126_1003	No	NA	360	CQ	Chloroquine	600 mg d0 + 300 mg d1	900 mg	India	Wild - Dehli, India	P14	P14_126	126	1998	Adak et al, 1998	Outpatients	28.6376	77.2235	8	Frequent relapse + long latency	Frequent relapse + long latency, Old World	Old World	tropical	Old World, tropical
126_1004	No	NA	360	CQ	Chloroquine	600 mg d0 + 300 mg d1	900 mg	India	Wild - Dehli, India	P14	P14_126	126	1998	Adak et al, 1998	Outpatients	28.6376	77.2235	8	Frequent relapse + long latency	Frequent relapse + long latency, Old World	Old World	tropical	Old World, tropical
126_1005	No	NA	360	CQ	Chloroquine	600 mg d0 + 300 mg d1	900 mg	India	Wild - Dehli, India	P14	P14_126	126	1998	Adak et al, 1998	Outpatients	28.6376	77.2235	8	Frequent relapse + long latency	Frequent relapse + long latency, Old World	Old World	tropical	Old World, tropical
126_1006	No	NA	360	CQ	Chloroquine	600 mg d0 + 300 mg d1	900 mg	India	Wild - Dehli, India	P14	P14_126	126	1998	Adak et al, 1998	Outpatients	28.6376	77.2235	8	Frequent relapse + long latency	Frequent relapse + long latency, Old World	Old World	tropical	Old World, tropical
126_1007	No	NA	360	CQ	Chloroquine	600 mg d0 + 300 mg d1	900 mg	India	Wild - Dehli, India	P14	P14_126	126	1998	Adak et al, 1998	Outpatients	28.6376	77.2235	8	Frequent relapse + long latency	Frequent relapse + long latency, Old World	Old World	tropical	Old World, tropical
126_1008	No	NA	360	CQ	Chloroquine	600 mg d0 + 300 mg d1	900 mg	India	Wild - Dehli, India	P14	P14_126	126	1998	Adak et al, 1998	Outpatients	28.6376	77.2235	8	Frequent relapse + long latency	Frequent relapse + long latency, Old World	Old World	tropical	Old World, tropical
126_1009	No	NA	360	CQ	Chloroquine	600 mg d0 + 300 mg d1	900 mg	India	Wild - Dehli, India	P14	P14_126	126	1998	Adak et al, 1998	Outpatients	28.6376	77.2235	8	Frequent relapse + long latency	Frequent relapse + long latency, Old World	Old World	tropical	Old World, tropical
126_101	Yes	60	60	CQ	Chloroquine	600 mg d0 + 300 mg d1	900 mg	India	Wild - Dehli, India	P14	P14_126	126	1998	Adak et al, 1998	Outpatients	28.6376	77.2235	8	Frequent relapse + long latency	Frequent relapse + long latency, Old World	Old World	tropical	Old World, tropical
126_1010	No	NA	360	CQ	Chloroquine	600 mg d0 + 300 mg d1	900 mg	India	Wild - Dehli, India	P14	P14_126	126	1998	Adak et al, 1998	Outpatients	28.6376	77.2235	8	Frequent relapse + long latency	Frequent relapse + long latency, Old World	Old World	tropical	Old World, tropical
126_1011	No	NA	360	CQ	Chloroquine	600 mg d0 + 300 mg d1	900 mg	India	Wild - Dehli, India	P14	P14_126	126	1998	Adak et al, 1998	Outpatients	28.6376	77.2235	8	Frequent relapse + long latency	Frequent relapse + long latency, Old World	Old World	tropical	Old World, tropical
126_1012	No	NA	360	CQ	Chloroquine	600 mg d0 + 300 mg d1	900 mg	India	Wild - Dehli, India	P14	P14_126	126	1998	Adak et al, 1998	Outpatients	28.6376	77.2235	8	Frequent relapse + long latency	Frequent relapse + long latency, Old World	Old World	tropical	Old World, tropical
126_1013	No	NA	360	CQ	Chloroquine	600 mg d0 + 300 mg d1	900 mg	India	Wild - Dehli, India	P14	P14_126	126	1998	Adak et al, 1998	Outpatients	28.6376	77.2235	8	Frequent relapse + long latency	Frequent relapse + long latency, Old World	Old World	tropical	Old World, tropical
126_1014	No	NA	360	CQ	Chloroquine	600 mg d0 + 300 mg d1	900 mg	India	Wild - Dehli, India	P14	P14_126	126	1998	Adak et al, 1998	Outpatients	28.6376	77.2235	8	Frequent relapse + long latency	Frequent relapse + long latency, Old World	Old World	tropical	Old World, tropical
126_1015	No	NA	360	CQ	Chloroquine	600 mg d0 + 300 mg d1	900 mg	India	Wild - Dehli, India	P14	P14_126	126	1998	Adak et al, 1998	Outpatients	28.6376	77.2235	8	Frequent relapse + long latency	Frequent relapse + long latency, Old World	Old World	tropical	Old World, tropical
126_1016	No	NA	360	CQ	Chloroquine	600 mg d0 + 300 mg d1	900 mg	India	Wild - Dehli, India	P14	P14_126	126	1998	Adak et al, 1998	Outpatients	28.6376	77.2235	8	Frequent relapse + long latency	Frequent relapse + long latency, Old World	Old World	tropical	Old World, tropical
126_1017	No	NA	360	CQ	Chloroquine	600 mg d0 + 300 mg d1	900 mg	India	Wild - Dehli, India	P14	P14_126	126	1998	Adak et al, 1998	Outpatients	28.6376	77.2235	8	Frequent relapse + long latency	Frequent relapse + long latency, Old World	Old World	tropical	Old World, tropical
126_1018	No	NA	360	CQ	Chloroquine	600 mg d0 + 300 mg d1	900 mg	India	Wild - Dehli, India	P14	P14_126	126	1998	Adak et al, 1998	Outpatients	28.6376	77.2235	8	Frequent relapse + long latency	Frequent relapse + long latency, Old World	Old World	tropical	Old World, tropical
126_1019	No	NA	360	CQ	Chloroquine	600 mg d0 + 300 mg d1	900 mg	India	Wild - Dehli, India	P14	P14_126	126	1998	Adak et al, 1998	Outpatients	28.6376	77.2235	8	Frequent relapse + long latency	Frequent relapse + long latency, Old World	Old World	tropical	Old World, tropical
126_102	Yes	60	60	CQ	Chloroquine	600 mg d0 + 300 mg d1	900 mg	India	Wild - Dehli, India	P14	P14_126	126	1998	Adak et al, 1998	Outpatients	28.6376	77.2235	8	Frequent relapse + long latency	Frequent relapse + long latency, Old World	Old World	tropical	Old World, tropical
126_1020	No	NA	360	CQ	Chloroquine	600 mg d0 + 300 mg d1	900 mg	India	Wild - Dehli, India	P14	P14_126	126	1998	Adak et al, 1998	Outpatients	28.6376	77.2235	8	Frequent relapse + long latency	Frequent relapse + long latency, Old World	Old World	tropical	Old World, tropical
126_1021	No	NA	360	CQ	Chloroquine	600 mg d0 + 300 mg d1	900 mg	India	Wild - Dehli, India	P14	P14_126	126	1998	Adak et al, 1998	Outpatients	28.6376	77.2235	8	Frequent relapse + long latency	Frequent relapse + long latency, Old World	Old World	tropical	Old World, tropical
126_1022	No	NA	360	CQ	Chloroquine	600 mg d0 + 300 mg d1	900 mg	India	Wild - Dehli, India	P14	P14_126	126	1998	Adak et al, 1998	Outpatients	28.6376	77.2235	8	Frequent relapse + long latency	Frequent relapse + long latency, Old World	Old World	tropical	Old World, tropical
126_1023	No	NA	360	CQ	Chloroquine	600 mg d0 + 300 mg d1	900 mg	India	Wild - Dehli, India	P14	P14_126	126	1998	Adak et al, 1998	Outpatients	28.6376	77.2235	8	Frequent relapse + long latency	Frequent relapse + long latency, Old World	Old World	tropical	Old World, tropical
126_1024	No	NA	360	CQ	Chloroquine	600 mg d0 + 300 mg d1	900 mg	India	Wild - Dehli, India	P14	P14_126	126	1998	Adak et al, 1998	Outpatients	28.6376	77.2235	8	Frequent relapse + long latency	Frequent relapse + long latency, Old World	Old World	tropical	Old World, tropical
126_1025	No	NA	360	CQ	Chloroquine	600 mg d0 + 300 mg d1	900 mg	India	Wild - Dehli, India	P14	P14_126	126	1998	Adak et al, 1998	Outpatients	28.6376	77.2235	8	Frequent relapse + long latency	Frequent relapse + long latency, Old World	Old World	tropical	Old World, tropical
126_1026	No	NA	360	CQ	Chloroquine	600 mg d0 + 300 mg d1	900 mg	India	Wild - Dehli, India	P14	P14_126	126	1998	Adak et al, 1998	Outpatients	28.6376	77.2235	8	Frequent relapse + long latency	Frequent relapse + long latency, Old World	Old World	tropical	Old World, tropical
126_1027	No	NA	360	CQ	Chloroquine	600 mg d0 + 300 mg d1	900 mg	India	Wild - Dehli, India	P14	P14_126	126	1998	Adak et al, 1998	Outpatients	28.6376	77.2235	8	Frequent relapse + long latency	Frequent relapse + long latency, Old World	Old World	tropical	Old World, tropical
126_1028	No	NA	360	CQ	Chloroquine	600 mg d0 + 300 mg d1	900 mg	India	Wild - Dehli, India	P14	P14_126	126	1998	Adak et al, 1998	Outpatients	28.6376	77.2235	8	Frequent relapse + long latency	Frequent relapse + long latency, Old World	Old World	tropical	Old World, tropical
126_1029	No	NA	360	CQ	Chloroquine	600 mg d0 + 300 mg d1	900 mg	India	Wild - Dehli, India	P14	P14_126	126	1998	Adak et al, 1998	Outpatients	28.6376	77.2235	8	Frequent relapse + long latency	Frequent relapse + long latency, Old World	Old World	tropical	Old World, tropical
126_103	Yes	60	60	CQ	Chloroquine	600 mg d0 + 300 mg d1	900 mg	India	Wild - Dehli, India	P14	P14_126	126	1998	Adak et al, 1998	Outpatients	28.6376	77.2235	8	Frequent relapse + long latency	Frequent relapse + long latency, Old World	Old World	tropical	Old World, tropical
126_1030	No	NA	360	CQ	Chloroquine	600 mg d0 + 300 mg d1	900 mg	India	Wild - Dehli, India	P14	P14_126	126	1998	Adak et al, 1998	Outpatients	28.6376	77.2235	8	Frequent relapse + long latency	Frequent relapse + long latency, Old World	Old World	tropical	Old World, tropical
126_1031	No	NA	360	CQ	Chloroquine	600 mg d0 + 300 mg d1	900 mg	India	Wild - Dehli, India	P14	P14_126	126	1998	Adak et al, 1998	Outpatients	28.6376	77.2235	8	Frequent relapse + long latency	Frequent relapse + long latency, Old World	Old World	tropical	Old World, tropical
126_1032	No	NA	360	CQ	Chloroquine	600 mg d0 + 300 mg d1	900 mg	India	Wild - Dehli, India	P14	P14_126	126	1998	Adak et al, 1998	Outpatients	28.6376	77.2235	8	Frequent relapse + long latency	Frequent relapse + long latency, Old World	Old World	tropical	Old World, tropical
126_1033	No	NA	360	CQ	Chloroquine	600 mg d0 + 300 mg d1	900 mg	India	Wild - Dehli, India	P14	P14_126	126	1998	Adak et al, 1998	Outpatients	28.6376	77.2235	8	Frequent relapse + long latency	Frequent relapse + long latency, Old World	Old World	tropical	Old World, tropical
126_1034	No	NA	360	CQ	Chloroquine	600 mg d0 + 300 mg d1	900 mg	India	Wild - Dehli, India	P14	P14_126	126	1998	Adak et al, 1998	Outpatients	28.6376	77.2235	8	Frequent relapse + long latency	Frequent relapse + long latency, Old World	Old World	tropical	Old World, tropical
126_1035	No	NA	360	CQ	Chloroquine	600 mg d0 + 300 mg d1	900 mg	India	Wild - Dehli, India	P14	P14_126	126	1998	Adak et al, 1998	Outpatients	28.6376	77.2235	8	Frequent relapse + long latency	Frequent relapse + long latency, Old World	Old World	tropical	Old World, tropical
126_1036	No	NA	360	CQ	Chloroquine	600 mg d0 + 300 mg d1	900 mg	India	Wild - Dehli, India	P14	P14_126	126	1998	Adak et al, 1998	Outpatients	28.6376	77.2235	8	Frequent relapse + long latency	Frequent relapse + long latency, Old World	Old World	tropical	Old World, tropical
126_1037	No	NA	360	CQ	Chloroquine	600 mg d0 + 300 mg d1	900 mg	India	Wild - Dehli, India	P14	P14_126	126	1998	Adak et al, 1998	Outpatients	28.6376	77.2235	8	Frequent relapse + long latency	Frequent relapse + long latency, Old World	Old World	tropical	Old World, tropical
126_1038	No	NA	360	CQ	Chloroquine	600 mg d0 + 300 mg d1	900 mg	India	Wild - Dehli, India	P14	P14_126	126	1998	Adak et al, 1998	Outpatients	28.6376	77.2235	8	Frequent relapse + long latency	Frequent relapse + long latency, Old World	Old World	tropical	Old World, tropical
126_1039	No	NA	360	CQ	Chloroquine	600 mg d0 + 300 mg d1	900 mg	India	Wild - Dehli, India	P14	P14_126	126	1998	Adak et al, 1998	Outpatients	28.6376	77.2235	8	Frequent relapse + long latency	Frequent relapse + long latency, Old World	Old World	tropical	Old World, tropical
126_104	Yes	60	60	CQ	Chloroquine	600 mg d0 + 300 mg d1	900 mg	India	Wild - Dehli, India	P14	P14_126	126	1998	Adak et al, 1998	Outpatients	28.6376	77.2235	8	Frequent relapse + long latency	Frequent relapse + long latency, Old World	Old World	tropical	Old World, tropical
126_1040	No	NA	360	CQ	Chloroquine	600 mg d0 + 300 mg d1	900 mg	India	Wild - Dehli, India	P14	P14_126	126	1998	Adak et al, 1998	Outpatients	28.6376	77.2235	8	Frequent relapse + long latency	Frequent relapse + long latency, Old World	Old World	tropical	Old World, tropical
126_1041	No	NA	360	CQ	Chloroquine	600 mg d0 + 300 mg d1	900 mg	India	Wild - Dehli, India	P14	P14_126	126	1998	Adak et al, 1998	Outpatients	28.6376	77.2235	8	Frequent relapse + long latency	Frequent relapse + long latency, Old World	Old World	tropical	Old World, tropical
126_1042	No	NA	360	CQ	Chloroquine	600 mg d0 + 300 mg d1	900 mg	India	Wild - Dehli, India	P14	P14_126	126	1998	Adak et al, 1998	Outpatients	28.6376	77.2235	8	Frequent relapse + long latency	Frequent relapse + long latency, Old World	Old World	tropical	Old World, tropical
126_1043	No	NA	360	CQ	Chloroquine	600 mg d0 + 300 mg d1	900 mg	India	Wild - Dehli, India	P14	P14_126	126	1998	Adak et al, 1998	Outpatients	28.6376	77.2235	8	Frequent relapse + long latency	Frequent relapse + long latency, Old World	Old World	tropical	Old World, tropical
126_1044	No	NA	360	CQ	Chloroquine	600 mg d0 + 300 mg d1	900 mg	India	Wild - Dehli, India	P14	P14_126	126	1998	Adak et al, 1998	Outpatients	28.6376	77.2235	8	Frequent relapse + long latency	Frequent relapse + long latency, Old World	Old World	tropical	Old World, tropical
126_1045	No	NA	360	CQ	Chloroquine	600 mg d0 + 300 mg d1	900 mg	India	Wild - Dehli, India	P14	P14_126	126	1998	Adak et al, 1998	Outpatients	28.6376	77.2235	8	Frequent relapse + long latency	Frequent relapse + long latency, Old World	Old World	tropical	Old World, tropical
126_1046	No	NA	360	CQ	Chloroquine	600 mg d0 + 300 mg d1	900 mg	India	Wild - Dehli, India	P14	P14_126	126	1998	Adak et al, 1998	Outpatients	28.6376	77.2235	8	Frequent relapse + long latency	Frequent relapse + long latency, Old World	Old World	tropical	Old World, tropical
126_1047	No	NA	360	CQ	Chloroquine	600 mg d0 + 300 mg d1	900 mg	India	Wild - Dehli, India	P14	P14_126	126	1998	Adak et al, 1998	Outpatients	28.6376	77.2235	8	Frequent relapse + long latency	Frequent relapse + long latency, Old World	Old World	tropical	Old World, tropical
126_1048	No	NA	360	CQ	Chloroquine	600 mg d0 + 300 mg d1	900 mg	India	Wild - Dehli, India	P14	P14_126	126	1998	Adak et al, 1998	Outpatients	28.6376	77.2235	8	Frequent relapse + long latency	Frequent relapse + long latency, Old World	Old World	tropical	Old World, tropical
126_1049	No	NA	360	CQ	Chloroquine	600 mg d0 + 300 mg d1	900 mg	India	Wild - Dehli, India	P14	P14_126	126	1998	Adak et al, 1998	Outpatients	28.6376	77.2235	8	Frequent relapse + long latency	Frequent relapse + long latency, Old World	Old World	tropical	Old World, tropical
126_105	Yes	60	60	CQ	Chloroquine	600 mg d0 + 300 mg d1	900 mg	India	Wild - Dehli, India	P14	P14_126	126	1998	Adak et al, 1998	Outpatients	28.6376	77.2235	8	Frequent relapse + long latency	Frequent relapse + long latency, Old World	Old World	tropical	Old World, tropical
126_1050	No	NA	360	CQ	Chloroquine	600 mg d0 + 300 mg d1	900 mg	India	Wild - Dehli, India	P14	P14_126	126	1998	Adak et al, 1998	Outpatients	28.6376	77.2235	8	Frequent relapse + long latency	Frequent relapse + long latency, Old World	Old World	tropical	Old World, tropical
126_1051	No	NA	360	CQ	Chloroquine	600 mg d0 + 300 mg d1	900 mg	India	Wild - Dehli, India	P14	P14_126	126	1998	Adak et al, 1998	Outpatients	28.6376	77.2235	8	Frequent relapse + long latency	Frequent relapse + long latency, Old World	Old World	tropical	Old World, tropical
126_1052	No	NA	360	CQ	Chloroquine	600 mg d0 + 300 mg d1	900 mg	India	Wild - Dehli, India	P14	P14_126	126	1998	Adak et al, 1998	Outpatients	28.6376	77.2235	8	Frequent relapse + long latency	Frequent relapse + long latency, Old World	Old World	tropical	Old World, tropical
126_1053	No	NA	360	CQ	Chloroquine	600 mg d0 + 300 mg d1	900 mg	India	Wild - Dehli, India	P14	P14_126	126	1998	Adak et al, 1998	Outpatients	28.6376	77.2235	8	Frequent relapse + long latency	Frequent relapse + long latency, Old World	Old World	tropical	Old World, tropical
126_1054	No	NA	360	CQ	Chloroquine	600 mg d0 + 300 mg d1	900 mg	India	Wild - Dehli, India	P14	P14_126	126	1998	Adak et al, 1998	Outpatients	28.6376	77.2235	8	Frequent relapse + long latency	Frequent relapse + long latency, Old World	Old World	tropical	Old World, tropical
126_1055	No	NA	360	CQ	Chloroquine	600 mg d0 + 300 mg d1	900 mg	India	Wild - Dehli, India	P14	P14_126	126	1998	Adak et al, 1998	Outpatients	28.6376	77.2235	8	Frequent relapse + long latency	Frequent relapse + long latency, Old World	Old World	tropical	Old World, tropical
126_1056	No	NA	360	CQ	Chloroquine	600 mg d0 + 300 mg d1	900 mg	India	Wild - Dehli, India	P14	P14_126	126	1998	Adak et al, 1998	Outpatients	28.6376	77.2235	8	Frequent relapse + long latency	Frequent relapse + long latency, Old World	Old World	tropical	Old World, tropical
126_1057	No	NA	360	CQ	Chloroquine	600 mg d0 + 300 mg d1	900 mg	India	Wild - Dehli, India	P14	P14_126	126	1998	Adak et al, 1998	Outpatients	28.6376	77.2235	8	Frequent relapse + long latency	Frequent relapse + long latency, Old World	Old World	tropical	Old World, tropical
126_1058	No	NA	360	CQ	Chloroquine	600 mg d0 + 300 mg d1	900 mg	India	Wild - Dehli, India	P14	P14_126	126	1998	Adak et al, 1998	Outpatients	28.6376	77.2235	8	Frequent relapse + long latency	Frequent relapse + long latency, Old World	Old World	tropical	Old World, tropical
126_1059	No	NA	360	CQ	Chloroquine	600 mg d0 + 300 mg d1	900 mg	India	Wild - Dehli, India	P14	P14_126	126	1998	Adak et al, 1998	Outpatients	28.6376	77.2235	8	Frequent relapse + long latency	Frequent relapse + long latency, Old World	Old World	tropical	Old World, tropical
126_106	Yes	60	60	CQ	Chloroquine	600 mg d0 + 300 mg d1	900 mg	India	Wild - Dehli, India	P14	P14_126	126	1998	Adak et al, 1998	Outpatients	28.6376	77.2235	8	Frequent relapse + long latency	Frequent relapse + long latency, Old World	Old World	tropical	Old World, tropical
126_1060	No	NA	360	CQ	Chloroquine	600 mg d0 + 300 mg d1	900 mg	India	Wild - Dehli, India	P14	P14_126	126	1998	Adak et al, 1998	Outpatients	28.6376	77.2235	8	Frequent relapse + long latency	Frequent relapse + long latency, Old World	Old World	tropical	Old World, tropical
126_1061	No	NA	360	CQ	Chloroquine	600 mg d0 + 300 mg d1	900 mg	India	Wild - Dehli, India	P14	P14_126	126	1998	Adak et al, 1998	Outpatients	28.6376	77.2235	8	Frequent relapse + long latency	Frequent relapse + long latency, Old World	Old World	tropical	Old World, tropical
126_1062	No	NA	360	CQ	Chloroquine	600 mg d0 + 300 mg d1	900 mg	India	Wild - Dehli, India	P14	P14_126	126	1998	Adak et al, 1998	Outpatients	28.6376	77.2235	8	Frequent relapse + long latency	Frequent relapse + long latency, Old World	Old World	tropical	Old World, tropical
126_1063	No	NA	360	CQ	Chloroquine	600 mg d0 + 300 mg d1	900 mg	India	Wild - Dehli, India	P14	P14_126	126	1998	Adak et al, 1998	Outpatients	28.6376	77.2235	8	Frequent relapse + long latency	Frequent relapse + long latency, Old World	Old World	tropical	Old World, tropical
126_1064	No	NA	360	CQ	Chloroquine	600 mg d0 + 300 mg d1	900 mg	India	Wild - Dehli, India	P14	P14_126	126	1998	Adak et al, 1998	Outpatients	28.6376	77.2235	8	Frequent relapse + long latency	Frequent relapse + long latency, Old World	Old World	tropical	Old World, tropical
126_1065	No	NA	360	CQ	Chloroquine	600 mg d0 + 300 mg d1	900 mg	India	Wild - Dehli, India	P14	P14_126	126	1998	Adak et al, 1998	Outpatients	28.6376	77.2235	8	Frequent relapse + long latency	Frequent relapse + long latency, Old World	Old World	tropical	Old World, tropical
126_1066	No	NA	360	CQ	Chloroquine	600 mg d0 + 300 mg d1	900 mg	India	Wild - Dehli, India	P14	P14_126	126	1998	Adak et al, 1998	Outpatients	28.6376	77.2235	8	Frequent relapse + long latency	Frequent relapse + long latency, Old World	Old World	tropical	Old World, tropical
126_1067	No	NA	360	CQ	Chloroquine	600 mg d0 + 300 mg d1	900 mg	India	Wild - Dehli, India	P14	P14_126	126	1998	Adak et al, 1998	Outpatients	28.6376	77.2235	8	Frequent relapse + long latency	Frequent relapse + long latency, Old World	Old World	tropical	Old World, tropical
126_1068	No	NA	360	CQ	Chloroquine	600 mg d0 + 300 mg d1	900 mg	India	Wild - Dehli, India	P14	P14_126	126	1998	Adak et al, 1998	Outpatients	28.6376	77.2235	8	Frequent relapse + long latency	Frequent relapse + long latency, Old World	Old World	tropical	Old World, tropical
126_1069	No	NA	360	CQ	Chloroquine	600 mg d0 + 300 mg d1	900 mg	India	Wild - Dehli, India	P14	P14_126	126	1998	Adak et al, 1998	Outpatients	28.6376	77.2235	8	Frequent relapse + long latency	Frequent relapse + long latency, Old World	Old World	tropical	Old World, tropical
126_107	Yes	60	60	CQ	Chloroquine	600 mg d0 + 300 mg d1	900 mg	India	Wild - Dehli, India	P14	P14_126	126	1998	Adak et al, 1998	Outpatients	28.6376	77.2235	8	Frequent relapse + long latency	Frequent relapse + long latency, Old World	Old World	tropical	Old World, tropical
126_1070	No	NA	360	CQ	Chloroquine	600 mg d0 + 300 mg d1	900 mg	India	Wild - Dehli, India	P14	P14_126	126	1998	Adak et al, 1998	Outpatients	28.6376	77.2235	8	Frequent relapse + long latency	Frequent relapse + long latency, Old World	Old World	tropical	Old World, tropical
126_1071	No	NA	360	CQ	Chloroquine	600 mg d0 + 300 mg d1	900 mg	India	Wild - Dehli, India	P14	P14_126	126	1998	Adak et al, 1998	Outpatients	28.6376	77.2235	8	Frequent relapse + long latency	Frequent relapse + long latency, Old World	Old World	tropical	Old World, tropical
126_1072	No	NA	360	CQ	Chloroquine	600 mg d0 + 300 mg d1	900 mg	India	Wild - Dehli, India	P14	P14_126	126	1998	Adak et al, 1998	Outpatients	28.6376	77.2235	8	Frequent relapse + long latency	Frequent relapse + long latency, Old World	Old World	tropical	Old World, tropical
126_1073	No	NA	360	CQ	Chloroquine	600 mg d0 + 300 mg d1	900 mg	India	Wild - Dehli, India	P14	P14_126	126	1998	Adak et al, 1998	Outpatients	28.6376	77.2235	8	Frequent relapse + long latency	Frequent relapse + long latency, Old World	Old World	tropical	Old World, tropical
126_1074	No	NA	360	CQ	Chloroquine	600 mg d0 + 300 mg d1	900 mg	India	Wild - Dehli, India	P14	P14_126	126	1998	Adak et al, 1998	Outpatients	28.6376	77.2235	8	Frequent relapse + long latency	Frequent relapse + long latency, Old World	Old World	tropical	Old World, tropical
126_1075	No	NA	360	CQ	Chloroquine	600 mg d0 + 300 mg d1	900 mg	India	Wild - Dehli, India	P14	P14_126	126	1998	Adak et al, 1998	Outpatients	28.6376	77.2235	8	Frequent relapse + long latency	Frequent relapse + long latency, Old World	Old World	tropical	Old World, tropical
126_1076	No	NA	360	CQ	Chloroquine	600 mg d0 + 300 mg d1	900 mg	India	Wild - Dehli, India	P14	P14_126	126	1998	Adak et al, 1998	Outpatients	28.6376	77.2235	8	Frequent relapse + long latency	Frequent relapse + long latency, Old World	Old World	tropical	Old World, tropical
126_1077	No	NA	360	CQ	Chloroquine	600 mg d0 + 300 mg d1	900 mg	India	Wild - Dehli, India	P14	P14_126	126	1998	Adak et al, 1998	Outpatients	28.6376	77.2235	8	Frequent relapse + long latency	Frequent relapse + long latency, Old World	Old World	tropical	Old World, tropical
126_1078	No	NA	360	CQ	Chloroquine	600 mg d0 + 300 mg d1	900 mg	India	Wild - Dehli, India	P14	P14_126	126	1998	Adak et al, 1998	Outpatients	28.6376	77.2235	8	Frequent relapse + long latency	Frequent relapse + long latency, Old World	Old World	tropical	Old World, tropical
126_1079	No	NA	360	CQ	Chloroquine	600 mg d0 + 300 mg d1	900 mg	India	Wild - Dehli, India	P14	P14_126	126	1998	Adak et al, 1998	Outpatients	28.6376	77.2235	8	Frequent relapse + long latency	Frequent relapse + long latency, Old World	Old World	tropical	Old World, tropical
126_108	Yes	60	60	CQ	Chloroquine	600 mg d0 + 300 mg d1	900 mg	India	Wild - Dehli, India	P14	P14_126	126	1998	Adak et al, 1998	Outpatients	28.6376	77.2235	8	Frequent relapse + long latency	Frequent relapse + long latency, Old World	Old World	tropical	Old World, tropical
126_1080	No	NA	360	CQ	Chloroquine	600 mg d0 + 300 mg d1	900 mg	India	Wild - Dehli, India	P14	P14_126	126	1998	Adak et al, 1998	Outpatients	28.6376	77.2235	8	Frequent relapse + long latency	Frequent relapse + long latency, Old World	Old World	tropical	Old World, tropical
126_1081	No	NA	360	CQ	Chloroquine	600 mg d0 + 300 mg d1	900 mg	India	Wild - Dehli, India	P14	P14_126	126	1998	Adak et al, 1998	Outpatients	28.6376	77.2235	8	Frequent relapse + long latency	Frequent relapse + long latency, Old World	Old World	tropical	Old World, tropical
126_1082	No	NA	360	CQ	Chloroquine	600 mg d0 + 300 mg d1	900 mg	India	Wild - Dehli, India	P14	P14_126	126	1998	Adak et al, 1998	Outpatients	28.6376	77.2235	8	Frequent relapse + long latency	Frequent relapse + long latency, Old World	Old World	tropical	Old World, tropical
126_1083	No	NA	360	CQ	Chloroquine	600 mg d0 + 300 mg d1	900 mg	India	Wild - Dehli, India	P14	P14_126	126	1998	Adak et al, 1998	Outpatients	28.6376	77.2235	8	Frequent relapse + long latency	Frequent relapse + long latency, Old World	Old World	tropical	Old World, tropical
126_1084	No	NA	360	CQ	Chloroquine	600 mg d0 + 300 mg d1	900 mg	India	Wild - Dehli, India	P14	P14_126	126	1998	Adak et al, 1998	Outpatients	28.6376	77.2235	8	Frequent relapse + long latency	Frequent relapse + long latency, Old World	Old World	tropical	Old World, tropical
126_1085	No	NA	360	CQ	Chloroquine	600 mg d0 + 300 mg d1	900 mg	India	Wild - Dehli, India	P14	P14_126	126	1998	Adak et al, 1998	Outpatients	28.6376	77.2235	8	Frequent relapse + long latency	Frequent relapse + long latency, Old World	Old World	tropical	Old World, tropical
126_1086	No	NA	360	CQ	Chloroquine	600 mg d0 + 300 mg d1	900 mg	India	Wild - Dehli, India	P14	P14_126	126	1998	Adak et al, 1998	Outpatients	28.6376	77.2235	8	Frequent relapse + long latency	Frequent relapse + long latency, Old World	Old World	tropical	Old World, tropical
126_1087	No	NA	360	CQ	Chloroquine	600 mg d0 + 300 mg d1	900 mg	India	Wild - Dehli, India	P14	P14_126	126	1998	Adak et al, 1998	Outpatients	28.6376	77.2235	8	Frequent relapse + long latency	Frequent relapse + long latency, Old World	Old World	tropical	Old World, tropical
126_1088	No	NA	360	CQ	Chloroquine	600 mg d0 + 300 mg d1	900 mg	India	Wild - Dehli, India	P14	P14_126	126	1998	Adak et al, 1998	Outpatients	28.6376	77.2235	8	Frequent relapse + long latency	Frequent relapse + long latency, Old World	Old World	tropical	Old World, tropical
126_1089	No	NA	360	CQ	Chloroquine	600 mg d0 + 300 mg d1	900 mg	India	Wild - Dehli, India	P14	P14_126	126	1998	Adak et al, 1998	Outpatients	28.6376	77.2235	8	Frequent relapse + long latency	Frequent relapse + long latency, Old World	Old World	tropical	Old World, tropical
126_109	Yes	60	60	CQ	Chloroquine	600 mg d0 + 300 mg d1	900 mg	India	Wild - Dehli, India	P14	P14_126	126	1998	Adak et al, 1998	Outpatients	28.6376	77.2235	8	Frequent relapse + long latency	Frequent relapse + long latency, Old World	Old World	tropical	Old World, tropical
126_1090	No	NA	360	CQ	Chloroquine	600 mg d0 + 300 mg d1	900 mg	India	Wild - Dehli, India	P14	P14_126	126	1998	Adak et al, 1998	Outpatients	28.6376	77.2235	8	Frequent relapse + long latency	Frequent relapse + long latency, Old World	Old World	tropical	Old World, tropical
126_1091	No	NA	360	CQ	Chloroquine	600 mg d0 + 300 mg d1	900 mg	India	Wild - Dehli, India	P14	P14_126	126	1998	Adak et al, 1998	Outpatients	28.6376	77.2235	8	Frequent relapse + long latency	Frequent relapse + long latency, Old World	Old World	tropical	Old World, tropical
126_1092	No	NA	360	CQ	Chloroquine	600 mg d0 + 300 mg d1	900 mg	India	Wild - Dehli, India	P14	P14_126	126	1998	Adak et al, 1998	Outpatients	28.6376	77.2235	8	Frequent relapse + long latency	Frequent relapse + long latency, Old World	Old World	tropical	Old World, tropical
126_1093	No	NA	360	CQ	Chloroquine	600 mg d0 + 300 mg d1	900 mg	India	Wild - Dehli, India	P14	P14_126	126	1998	Adak et al, 1998	Outpatients	28.6376	77.2235	8	Frequent relapse + long latency	Frequent relapse + long latency, Old World	Old World	tropical	Old World, tropical
126_1094	No	NA	360	CQ	Chloroquine	600 mg d0 + 300 mg d1	900 mg	India	Wild - Dehli, India	P14	P14_126	126	1998	Adak et al, 1998	Outpatients	28.6376	77.2235	8	Frequent relapse + long latency	Frequent relapse + long latency, Old World	Old World	tropical	Old World, tropical
126_1095	No	NA	360	CQ	Chloroquine	600 mg d0 + 300 mg d1	900 mg	India	Wild - Dehli, India	P14	P14_126	126	1998	Adak et al, 1998	Outpatients	28.6376	77.2235	8	Frequent relapse + long latency	Frequent relapse + long latency, Old World	Old World	tropical	Old World, tropical
126_1096	No	NA	360	CQ	Chloroquine	600 mg d0 + 300 mg d1	900 mg	India	Wild - Dehli, India	P14	P14_126	126	1998	Adak et al, 1998	Outpatients	28.6376	77.2235	8	Frequent relapse + long latency	Frequent relapse + long latency, Old World	Old World	tropical	Old World, tropical
126_1097	No	NA	360	CQ	Chloroquine	600 mg d0 + 300 mg d1	900 mg	India	Wild - Dehli, India	P14	P14_126	126	1998	Adak et al, 1998	Outpatients	28.6376	77.2235	8	Frequent relapse + long latency	Frequent relapse + long latency, Old World	Old World	tropical	Old World, tropical
126_1098	No	NA	360	CQ	Chloroquine	600 mg d0 + 300 mg d1	900 mg	India	Wild - Dehli, India	P14	P14_126	126	1998	Adak et al, 1998	Outpatients	28.6376	77.2235	8	Frequent relapse + long latency	Frequent relapse + long latency, Old World	Old World	tropical	Old World, tropical
126_1099	No	NA	360	CQ	Chloroquine	600 mg d0 + 300 mg d1	900 mg	India	Wild - Dehli, India	P14	P14_126	126	1998	Adak et al, 1998	Outpatients	28.6376	77.2235	8	Frequent relapse + long latency	Frequent relapse + long latency, Old World	Old World	tropical	Old World, tropical
126_11	Yes	30	30	CQ	Chloroquine	600 mg d0 + 300 mg d1	900 mg	India	Wild - Dehli, India	P14	P14_126	126	1998	Adak et al, 1998	Outpatients	28.6376	77.2235	8	Frequent relapse + long latency	Frequent relapse + long latency, Old World	Old World	tropical	Old World, tropical
126_110	Yes	60	60	CQ	Chloroquine	600 mg d0 + 300 mg d1	900 mg	India	Wild - Dehli, India	P14	P14_126	126	1998	Adak et al, 1998	Outpatients	28.6376	77.2235	8	Frequent relapse + long latency	Frequent relapse + long latency, Old World	Old World	tropical	Old World, tropical
126_1100	No	NA	360	CQ	Chloroquine	600 mg d0 + 300 mg d1	900 mg	India	Wild - Dehli, India	P14	P14_126	126	1998	Adak et al, 1998	Outpatients	28.6376	77.2235	8	Frequent relapse + long latency	Frequent relapse + long latency, Old World	Old World	tropical	Old World, tropical
126_1101	No	NA	360	CQ	Chloroquine	600 mg d0 + 300 mg d1	900 mg	India	Wild - Dehli, India	P14	P14_126	126	1998	Adak et al, 1998	Outpatients	28.6376	77.2235	8	Frequent relapse + long latency	Frequent relapse + long latency, Old World	Old World	tropical	Old World, tropical
126_1102	No	NA	360	CQ	Chloroquine	600 mg d0 + 300 mg d1	900 mg	India	Wild - Dehli, India	P14	P14_126	126	1998	Adak et al, 1998	Outpatients	28.6376	77.2235	8	Frequent relapse + long latency	Frequent relapse + long latency, Old World	Old World	tropical	Old World, tropical
126_1103	No	NA	360	CQ	Chloroquine	600 mg d0 + 300 mg d1	900 mg	India	Wild - Dehli, India	P14	P14_126	126	1998	Adak et al, 1998	Outpatients	28.6376	77.2235	8	Frequent relapse + long latency	Frequent relapse + long latency, Old World	Old World	tropical	Old World, tropical
126_1104	No	NA	360	CQ	Chloroquine	600 mg d0 + 300 mg d1	900 mg	India	Wild - Dehli, India	P14	P14_126	126	1998	Adak et al, 1998	Outpatients	28.6376	77.2235	8	Frequent relapse + long latency	Frequent relapse + long latency, Old World	Old World	tropical	Old World, tropical
126_1105	No	NA	360	CQ	Chloroquine	600 mg d0 + 300 mg d1	900 mg	India	Wild - Dehli, India	P14	P14_126	126	1998	Adak et al, 1998	Outpatients	28.6376	77.2235	8	Frequent relapse + long latency	Frequent relapse + long latency, Old World	Old World	tropical	Old World, tropical
126_1106	No	NA	360	CQ	Chloroquine	600 mg d0 + 300 mg d1	900 mg	India	Wild - Dehli, India	P14	P14_126	126	1998	Adak et al, 1998	Outpatients	28.6376	77.2235	8	Frequent relapse + long latency	Frequent relapse + long latency, Old World	Old World	tropical	Old World, tropical
126_1107	No	NA	360	CQ	Chloroquine	600 mg d0 + 300 mg d1	900 mg	India	Wild - Dehli, India	P14	P14_126	126	1998	Adak et al, 1998	Outpatients	28.6376	77.2235	8	Frequent relapse + long latency	Frequent relapse + long latency, Old World	Old World	tropical	Old World, tropical
126_1108	No	NA	360	CQ	Chloroquine	600 mg d0 + 300 mg d1	900 mg	India	Wild - Dehli, India	P14	P14_126	126	1998	Adak et al, 1998	Outpatients	28.6376	77.2235	8	Frequent relapse + long latency	Frequent relapse + long latency, Old World	Old World	tropical	Old World, tropical
126_1109	No	NA	360	CQ	Chloroquine	600 mg d0 + 300 mg d1	900 mg	India	Wild - Dehli, India	P14	P14_126	126	1998	Adak et al, 1998	Outpatients	28.6376	77.2235	8	Frequent relapse + long latency	Frequent relapse + long latency, Old World	Old World	tropical	Old World, tropical
126_111	Yes	60	60	CQ	Chloroquine	600 mg d0 + 300 mg d1	900 mg	India	Wild - Dehli, India	P14	P14_126	126	1998	Adak et al, 1998	Outpatients	28.6376	77.2235	8	Frequent relapse + long latency	Frequent relapse + long latency, Old World	Old World	tropical	Old World, tropical
126_1110	No	NA	360	CQ	Chloroquine	600 mg d0 + 300 mg d1	900 mg	India	Wild - Dehli, India	P14	P14_126	126	1998	Adak et al, 1998	Outpatients	28.6376	77.2235	8	Frequent relapse + long latency	Frequent relapse + long latency, Old World	Old World	tropical	Old World, tropical
126_1111	No	NA	360	CQ	Chloroquine	600 mg d0 + 300 mg d1	900 mg	India	Wild - Dehli, India	P14	P14_126	126	1998	Adak et al, 1998	Outpatients	28.6376	77.2235	8	Frequent relapse + long latency	Frequent relapse + long latency, Old World	Old World	tropical	Old World, tropical
126_1112	No	NA	360	CQ	Chloroquine	600 mg d0 + 300 mg d1	900 mg	India	Wild - Dehli, India	P14	P14_126	126	1998	Adak et al, 1998	Outpatients	28.6376	77.2235	8	Frequent relapse + long latency	Frequent relapse + long latency, Old World	Old World	tropical	Old World, tropical
126_1113	No	NA	360	CQ	Chloroquine	600 mg d0 + 300 mg d1	900 mg	India	Wild - Dehli, India	P14	P14_126	126	1998	Adak et al, 1998	Outpatients	28.6376	77.2235	8	Frequent relapse + long latency	Frequent relapse + long latency, Old World	Old World	tropical	Old World, tropical
126_1114	No	NA	360	CQ	Chloroquine	600 mg d0 + 300 mg d1	900 mg	India	Wild - Dehli, India	P14	P14_126	126	1998	Adak et al, 1998	Outpatients	28.6376	77.2235	8	Frequent relapse + long latency	Frequent relapse + long latency, Old World	Old World	tropical	Old World, tropical
126_1115	No	NA	360	CQ	Chloroquine	600 mg d0 + 300 mg d1	900 mg	India	Wild - Dehli, India	P14	P14_126	126	1998	Adak et al, 1998	Outpatients	28.6376	77.2235	8	Frequent relapse + long latency	Frequent relapse + long latency, Old World	Old World	tropical	Old World, tropical
126_1116	No	NA	360	CQ	Chloroquine	600 mg d0 + 300 mg d1	900 mg	India	Wild - Dehli, India	P14	P14_126	126	1998	Adak et al, 1998	Outpatients	28.6376	77.2235	8	Frequent relapse + long latency	Frequent relapse + long latency, Old World	Old World	tropical	Old World, tropical
126_1117	No	NA	360	CQ	Chloroquine	600 mg d0 + 300 mg d1	900 mg	India	Wild - Dehli, India	P14	P14_126	126	1998	Adak et al, 1998	Outpatients	28.6376	77.2235	8	Frequent relapse + long latency	Frequent relapse + long latency, Old World	Old World	tropical	Old World, tropical
126_1118	No	NA	360	CQ	Chloroquine	600 mg d0 + 300 mg d1	900 mg	India	Wild - Dehli, India	P14	P14_126	126	1998	Adak et al, 1998	Outpatients	28.6376	77.2235	8	Frequent relapse + long latency	Frequent relapse + long latency, Old World	Old World	tropical	Old World, tropical
126_1119	No	NA	360	CQ	Chloroquine	600 mg d0 + 300 mg d1	900 mg	India	Wild - Dehli, India	P14	P14_126	126	1998	Adak et al, 1998	Outpatients	28.6376	77.2235	8	Frequent relapse + long latency	Frequent relapse + long latency, Old World	Old World	tropical	Old World, tropical
126_112	Yes	60	60	CQ	Chloroquine	600 mg d0 + 300 mg d1	900 mg	India	Wild - Dehli, India	P14	P14_126	126	1998	Adak et al, 1998	Outpatients	28.6376	77.2235	8	Frequent relapse + long latency	Frequent relapse + long latency, Old World	Old World	tropical	Old World, tropical
126_1120	No	NA	360	CQ	Chloroquine	600 mg d0 + 300 mg d1	900 mg	India	Wild - Dehli, India	P14	P14_126	126	1998	Adak et al, 1998	Outpatients	28.6376	77.2235	8	Frequent relapse + long latency	Frequent relapse + long latency, Old World	Old World	tropical	Old World, tropical
126_1121	No	NA	360	CQ	Chloroquine	600 mg d0 + 300 mg d1	900 mg	India	Wild - Dehli, India	P14	P14_126	126	1998	Adak et al, 1998	Outpatients	28.6376	77.2235	8	Frequent relapse + long latency	Frequent relapse + long latency, Old World	Old World	tropical	Old World, tropical
126_1122	No	NA	360	CQ	Chloroquine	600 mg d0 + 300 mg d1	900 mg	India	Wild - Dehli, India	P14	P14_126	126	1998	Adak et al, 1998	Outpatients	28.6376	77.2235	8	Frequent relapse + long latency	Frequent relapse + long latency, Old World	Old World	tropical	Old World, tropical
126_1123	No	NA	360	CQ	Chloroquine	600 mg d0 + 300 mg d1	900 mg	India	Wild - Dehli, India	P14	P14_126	126	1998	Adak et al, 1998	Outpatients	28.6376	77.2235	8	Frequent relapse + long latency	Frequent relapse + long latency, Old World	Old World	tropical	Old World, tropical
126_1124	No	NA	360	CQ	Chloroquine	600 mg d0 + 300 mg d1	900 mg	India	Wild - Dehli, India	P14	P14_126	126	1998	Adak et al, 1998	Outpatients	28.6376	77.2235	8	Frequent relapse + long latency	Frequent relapse + long latency, Old World	Old World	tropical	Old World, tropical
126_1125	No	NA	360	CQ	Chloroquine	600 mg d0 + 300 mg d1	900 mg	India	Wild - Dehli, India	P14	P14_126	126	1998	Adak et al, 1998	Outpatients	28.6376	77.2235	8	Frequent relapse + long latency	Frequent relapse + long latency, Old World	Old World	tropical	Old World, tropical
126_1126	No	NA	360	CQ	Chloroquine	600 mg d0 + 300 mg d1	900 mg	India	Wild - Dehli, India	P14	P14_126	126	1998	Adak et al, 1998	Outpatients	28.6376	77.2235	8	Frequent relapse + long latency	Frequent relapse + long latency, Old World	Old World	tropical	Old World, tropical
126_1127	No	NA	360	CQ	Chloroquine	600 mg d0 + 300 mg d1	900 mg	India	Wild - Dehli, India	P14	P14_126	126	1998	Adak et al, 1998	Outpatients	28.6376	77.2235	8	Frequent relapse + long latency	Frequent relapse + long latency, Old World	Old World	tropical	Old World, tropical
126_1128	No	NA	360	CQ	Chloroquine	600 mg d0 + 300 mg d1	900 mg	India	Wild - Dehli, India	P14	P14_126	126	1998	Adak et al, 1998	Outpatients	28.6376	77.2235	8	Frequent relapse + long latency	Frequent relapse + long latency, Old World	Old World	tropical	Old World, tropical
126_1129	No	NA	360	CQ	Chloroquine	600 mg d0 + 300 mg d1	900 mg	India	Wild - Dehli, India	P14	P14_126	126	1998	Adak et al, 1998	Outpatients	28.6376	77.2235	8	Frequent relapse + long latency	Frequent relapse + long latency, Old World	Old World	tropical	Old World, tropical
126_113	Yes	60	60	CQ	Chloroquine	600 mg d0 + 300 mg d1	900 mg	India	Wild - Dehli, India	P14	P14_126	126	1998	Adak et al, 1998	Outpatients	28.6376	77.2235	8	Frequent relapse + long latency	Frequent relapse + long latency, Old World	Old World	tropical	Old World, tropical
126_1130	No	NA	360	CQ	Chloroquine	600 mg d0 + 300 mg d1	900 mg	India	Wild - Dehli, India	P14	P14_126	126	1998	Adak et al, 1998	Outpatients	28.6376	77.2235	8	Frequent relapse + long latency	Frequent relapse + long latency, Old World	Old World	tropical	Old World, tropical
126_1131	No	NA	360	CQ	Chloroquine	600 mg d0 + 300 mg d1	900 mg	India	Wild - Dehli, India	P14	P14_126	126	1998	Adak et al, 1998	Outpatients	28.6376	77.2235	8	Frequent relapse + long latency	Frequent relapse + long latency, Old World	Old World	tropical	Old World, tropical
126_1132	No	NA	360	CQ	Chloroquine	600 mg d0 + 300 mg d1	900 mg	India	Wild - Dehli, India	P14	P14_126	126	1998	Adak et al, 1998	Outpatients	28.6376	77.2235	8	Frequent relapse + long latency	Frequent relapse + long latency, Old World	Old World	tropical	Old World, tropical
126_1133	No	NA	360	CQ	Chloroquine	600 mg d0 + 300 mg d1	900 mg	India	Wild - Dehli, India	P14	P14_126	126	1998	Adak et al, 1998	Outpatients	28.6376	77.2235	8	Frequent relapse + long latency	Frequent relapse + long latency, Old World	Old World	tropical	Old World, tropical
126_1134	No	NA	360	CQ	Chloroquine	600 mg d0 + 300 mg d1	900 mg	India	Wild - Dehli, India	P14	P14_126	126	1998	Adak et al, 1998	Outpatients	28.6376	77.2235	8	Frequent relapse + long latency	Frequent relapse + long latency, Old World	Old World	tropical	Old World, tropical
126_1135	No	NA	360	CQ	Chloroquine	600 mg d0 + 300 mg d1	900 mg	India	Wild - Dehli, India	P14	P14_126	126	1998	Adak et al, 1998	Outpatients	28.6376	77.2235	8	Frequent relapse + long latency	Frequent relapse + long latency, Old World	Old World	tropical	Old World, tropical
126_1136	No	NA	360	CQ	Chloroquine	600 mg d0 + 300 mg d1	900 mg	India	Wild - Dehli, India	P14	P14_126	126	1998	Adak et al, 1998	Outpatients	28.6376	77.2235	8	Frequent relapse + long latency	Frequent relapse + long latency, Old World	Old World	tropical	Old World, tropical
126_1137	No	NA	360	CQ	Chloroquine	600 mg d0 + 300 mg d1	900 mg	India	Wild - Dehli, India	P14	P14_126	126	1998	Adak et al, 1998	Outpatients	28.6376	77.2235	8	Frequent relapse + long latency	Frequent relapse + long latency, Old World	Old World	tropical	Old World, tropical
126_1138	No	NA	360	CQ	Chloroquine	600 mg d0 + 300 mg d1	900 mg	India	Wild - Dehli, India	P14	P14_126	126	1998	Adak et al, 1998	Outpatients	28.6376	77.2235	8	Frequent relapse + long latency	Frequent relapse + long latency, Old World	Old World	tropical	Old World, tropical
126_1139	No	NA	360	CQ	Chloroquine	600 mg d0 + 300 mg d1	900 mg	India	Wild - Dehli, India	P14	P14_126	126	1998	Adak et al, 1998	Outpatients	28.6376	77.2235	8	Frequent relapse + long latency	Frequent relapse + long latency, Old World	Old World	tropical	Old World, tropical
126_114	Yes	60	60	CQ	Chloroquine	600 mg d0 + 300 mg d1	900 mg	India	Wild - Dehli, India	P14	P14_126	126	1998	Adak et al, 1998	Outpatients	28.6376	77.2235	8	Frequent relapse + long latency	Frequent relapse + long latency, Old World	Old World	tropical	Old World, tropical
126_1140	No	NA	360	CQ	Chloroquine	600 mg d0 + 300 mg d1	900 mg	India	Wild - Dehli, India	P14	P14_126	126	1998	Adak et al, 1998	Outpatients	28.6376	77.2235	8	Frequent relapse + long latency	Frequent relapse + long latency, Old World	Old World	tropical	Old World, tropical
126_1141	No	NA	360	CQ	Chloroquine	600 mg d0 + 300 mg d1	900 mg	India	Wild - Dehli, India	P14	P14_126	126	1998	Adak et al, 1998	Outpatients	28.6376	77.2235	8	Frequent relapse + long latency	Frequent relapse + long latency, Old World	Old World	tropical	Old World, tropical
126_1142	No	NA	360	CQ	Chloroquine	600 mg d0 + 300 mg d1	900 mg	India	Wild - Dehli, India	P14	P14_126	126	1998	Adak et al, 1998	Outpatients	28.6376	77.2235	8	Frequent relapse + long latency	Frequent relapse + long latency, Old World	Old World	tropical	Old World, tropical
126_1143	No	NA	360	CQ	Chloroquine	600 mg d0 + 300 mg d1	900 mg	India	Wild - Dehli, India	P14	P14_126	126	1998	Adak et al, 1998	Outpatients	28.6376	77.2235	8	Frequent relapse + long latency	Frequent relapse + long latency, Old World	Old World	tropical	Old World, tropical
126_1144	No	NA	360	CQ	Chloroquine	600 mg d0 + 300 mg d1	900 mg	India	Wild - Dehli, India	P14	P14_126	126	1998	Adak et al, 1998	Outpatients	28.6376	77.2235	8	Frequent relapse + long latency	Frequent relapse + long latency, Old World	Old World	tropical	Old World, tropical
126_1145	No	NA	360	CQ	Chloroquine	600 mg d0 + 300 mg d1	900 mg	India	Wild - Dehli, India	P14	P14_126	126	1998	Adak et al, 1998	Outpatients	28.6376	77.2235	8	Frequent relapse + long latency	Frequent relapse + long latency, Old World	Old World	tropical	Old World, tropical
126_1146	No	NA	360	CQ	Chloroquine	600 mg d0 + 300 mg d1	900 mg	India	Wild - Dehli, India	P14	P14_126	126	1998	Adak et al, 1998	Outpatients	28.6376	77.2235	8	Frequent relapse + long latency	Frequent relapse + long latency, Old World	Old World	tropical	Old World, tropical
126_1147	No	NA	360	CQ	Chloroquine	600 mg d0 + 300 mg d1	900 mg	India	Wild - Dehli, India	P14	P14_126	126	1998	Adak et al, 1998	Outpatients	28.6376	77.2235	8	Frequent relapse + long latency	Frequent relapse + long latency, Old World	Old World	tropical	Old World, tropical
126_1148	No	NA	360	CQ	Chloroquine	600 mg d0 + 300 mg d1	900 mg	India	Wild - Dehli, India	P14	P14_126	126	1998	Adak et al, 1998	Outpatients	28.6376	77.2235	8	Frequent relapse + long latency	Frequent relapse + long latency, Old World	Old World	tropical	Old World, tropical
126_1149	No	NA	360	CQ	Chloroquine	600 mg d0 + 300 mg d1	900 mg	India	Wild - Dehli, India	P14	P14_126	126	1998	Adak et al, 1998	Outpatients	28.6376	77.2235	8	Frequent relapse + long latency	Frequent relapse + long latency, Old World	Old World	tropical	Old World, tropical
126_115	Yes	60	60	CQ	Chloroquine	600 mg d0 + 300 mg d1	900 mg	India	Wild - Dehli, India	P14	P14_126	126	1998	Adak et al, 1998	Outpatients	28.6376	77.2235	8	Frequent relapse + long latency	Frequent relapse + long latency, Old World	Old World	tropical	Old World, tropical
126_1150	No	NA	360	CQ	Chloroquine	600 mg d0 + 300 mg d1	900 mg	India	Wild - Dehli, India	P14	P14_126	126	1998	Adak et al, 1998	Outpatients	28.6376	77.2235	8	Frequent relapse + long latency	Frequent relapse + long latency, Old World	Old World	tropical	Old World, tropical
126_1151	No	NA	360	CQ	Chloroquine	600 mg d0 + 300 mg d1	900 mg	India	Wild - Dehli, India	P14	P14_126	126	1998	Adak et al, 1998	Outpatients	28.6376	77.2235	8	Frequent relapse + long latency	Frequent relapse + long latency, Old World	Old World	tropical	Old World, tropical
126_1152	No	NA	360	CQ	Chloroquine	600 mg d0 + 300 mg d1	900 mg	India	Wild - Dehli, India	P14	P14_126	126	1998	Adak et al, 1998	Outpatients	28.6376	77.2235	8	Frequent relapse + long latency	Frequent relapse + long latency, Old World	Old World	tropical	Old World, tropical
126_1153	No	NA	360	CQ	Chloroquine	600 mg d0 + 300 mg d1	900 mg	India	Wild - Dehli, India	P14	P14_126	126	1998	Adak et al, 1998	Outpatients	28.6376	77.2235	8	Frequent relapse + long latency	Frequent relapse + long latency, Old World	Old World	tropical	Old World, tropical
126_1154	No	NA	360	CQ	Chloroquine	600 mg d0 + 300 mg d1	900 mg	India	Wild - Dehli, India	P14	P14_126	126	1998	Adak et al, 1998	Outpatients	28.6376	77.2235	8	Frequent relapse + long latency	Frequent relapse + long latency, Old World	Old World	tropical	Old World, tropical
126_1155	No	NA	360	CQ	Chloroquine	600 mg d0 + 300 mg d1	900 mg	India	Wild - Dehli, India	P14	P14_126	126	1998	Adak et al, 1998	Outpatients	28.6376	77.2235	8	Frequent relapse + long latency	Frequent relapse + long latency, Old World	Old World	tropical	Old World, tropical
126_1156	No	NA	360	CQ	Chloroquine	600 mg d0 + 300 mg d1	900 mg	India	Wild - Dehli, India	P14	P14_126	126	1998	Adak et al, 1998	Outpatients	28.6376	77.2235	8	Frequent relapse + long latency	Frequent relapse + long latency, Old World	Old World	tropical	Old World, tropical
126_1157	No	NA	360	CQ	Chloroquine	600 mg d0 + 300 mg d1	900 mg	India	Wild - Dehli, India	P14	P14_126	126	1998	Adak et al, 1998	Outpatients	28.6376	77.2235	8	Frequent relapse + long latency	Frequent relapse + long latency, Old World	Old World	tropical	Old World, tropical
126_1158	No	NA	360	CQ	Chloroquine	600 mg d0 + 300 mg d1	900 mg	India	Wild - Dehli, India	P14	P14_126	126	1998	Adak et al, 1998	Outpatients	28.6376	77.2235	8	Frequent relapse + long latency	Frequent relapse + long latency, Old World	Old World	tropical	Old World, tropical
126_1159	No	NA	360	CQ	Chloroquine	600 mg d0 + 300 mg d1	900 mg	India	Wild - Dehli, India	P14	P14_126	126	1998	Adak et al, 1998	Outpatients	28.6376	77.2235	8	Frequent relapse + long latency	Frequent relapse + long latency, Old World	Old World	tropical	Old World, tropical
126_116	Yes	60	60	CQ	Chloroquine	600 mg d0 + 300 mg d1	900 mg	India	Wild - Dehli, India	P14	P14_126	126	1998	Adak et al, 1998	Outpatients	28.6376	77.2235	8	Frequent relapse + long latency	Frequent relapse + long latency, Old World	Old World	tropical	Old World, tropical
126_1160	No	NA	360	CQ	Chloroquine	600 mg d0 + 300 mg d1	900 mg	India	Wild - Dehli, India	P14	P14_126	126	1998	Adak et al, 1998	Outpatients	28.6376	77.2235	8	Frequent relapse + long latency	Frequent relapse + long latency, Old World	Old World	tropical	Old World, tropical
126_1161	No	NA	360	CQ	Chloroquine	600 mg d0 + 300 mg d1	900 mg	India	Wild - Dehli, India	P14	P14_126	126	1998	Adak et al, 1998	Outpatients	28.6376	77.2235	8	Frequent relapse + long latency	Frequent relapse + long latency, Old World	Old World	tropical	Old World, tropical
126_1162	No	NA	360	CQ	Chloroquine	600 mg d0 + 300 mg d1	900 mg	India	Wild - Dehli, India	P14	P14_126	126	1998	Adak et al, 1998	Outpatients	28.6376	77.2235	8	Frequent relapse + long latency	Frequent relapse + long latency, Old World	Old World	tropical	Old World, tropical
126_1163	No	NA	360	CQ	Chloroquine	600 mg d0 + 300 mg d1	900 mg	India	Wild - Dehli, India	P14	P14_126	126	1998	Adak et al, 1998	Outpatients	28.6376	77.2235	8	Frequent relapse + long latency	Frequent relapse + long latency, Old World	Old World	tropical	Old World, tropical
126_1164	No	NA	360	CQ	Chloroquine	600 mg d0 + 300 mg d1	900 mg	India	Wild - Dehli, India	P14	P14_126	126	1998	Adak et al, 1998	Outpatients	28.6376	77.2235	8	Frequent relapse + long latency	Frequent relapse + long latency, Old World	Old World	tropical	Old World, tropical
126_1165	No	NA	360	CQ	Chloroquine	600 mg d0 + 300 mg d1	900 mg	India	Wild - Dehli, India	P14	P14_126	126	1998	Adak et al, 1998	Outpatients	28.6376	77.2235	8	Frequent relapse + long latency	Frequent relapse + long latency, Old World	Old World	tropical	Old World, tropical
126_1166	No	NA	360	CQ	Chloroquine	600 mg d0 + 300 mg d1	900 mg	India	Wild - Dehli, India	P14	P14_126	126	1998	Adak et al, 1998	Outpatients	28.6376	77.2235	8	Frequent relapse + long latency	Frequent relapse + long latency, Old World	Old World	tropical	Old World, tropical
126_1167	No	NA	360	CQ	Chloroquine	600 mg d0 + 300 mg d1	900 mg	India	Wild - Dehli, India	P14	P14_126	126	1998	Adak et al, 1998	Outpatients	28.6376	77.2235	8	Frequent relapse + long latency	Frequent relapse + long latency, Old World	Old World	tropical	Old World, tropical
126_1168	No	NA	360	CQ	Chloroquine	600 mg d0 + 300 mg d1	900 mg	India	Wild - Dehli, India	P14	P14_126	126	1998	Adak et al, 1998	Outpatients	28.6376	77.2235	8	Frequent relapse + long latency	Frequent relapse + long latency, Old World	Old World	tropical	Old World, tropical
126_1169	No	NA	360	CQ	Chloroquine	600 mg d0 + 300 mg d1	900 mg	India	Wild - Dehli, India	P14	P14_126	126	1998	Adak et al, 1998	Outpatients	28.6376	77.2235	8	Frequent relapse + long latency	Frequent relapse + long latency, Old World	Old World	tropical	Old World, tropical
126_117	Yes	60	60	CQ	Chloroquine	600 mg d0 + 300 mg d1	900 mg	India	Wild - Dehli, India	P14	P14_126	126	1998	Adak et al, 1998	Outpatients	28.6376	77.2235	8	Frequent relapse + long latency	Frequent relapse + long latency, Old World	Old World	tropical	Old World, tropical
126_1170	No	NA	360	CQ	Chloroquine	600 mg d0 + 300 mg d1	900 mg	India	Wild - Dehli, India	P14	P14_126	126	1998	Adak et al, 1998	Outpatients	28.6376	77.2235	8	Frequent relapse + long latency	Frequent relapse + long latency, Old World	Old World	tropical	Old World, tropical
126_1171	No	NA	360	CQ	Chloroquine	600 mg d0 + 300 mg d1	900 mg	India	Wild - Dehli, India	P14	P14_126	126	1998	Adak et al, 1998	Outpatients	28.6376	77.2235	8	Frequent relapse + long latency	Frequent relapse + long latency, Old World	Old World	tropical	Old World, tropical
126_1172	No	NA	360	CQ	Chloroquine	600 mg d0 + 300 mg d1	900 mg	India	Wild - Dehli, India	P14	P14_126	126	1998	Adak et al, 1998	Outpatients	28.6376	77.2235	8	Frequent relapse + long latency	Frequent relapse + long latency, Old World	Old World	tropical	Old World, tropical
126_1173	No	NA	360	CQ	Chloroquine	600 mg d0 + 300 mg d1	900 mg	India	Wild - Dehli, India	P14	P14_126	126	1998	Adak et al, 1998	Outpatients	28.6376	77.2235	8	Frequent relapse + long latency	Frequent relapse + long latency, Old World	Old World	tropical	Old World, tropical
126_1174	No	NA	360	CQ	Chloroquine	600 mg d0 + 300 mg d1	900 mg	India	Wild - Dehli, India	P14	P14_126	126	1998	Adak et al, 1998	Outpatients	28.6376	77.2235	8	Frequent relapse + long latency	Frequent relapse + long latency, Old World	Old World	tropical	Old World, tropical
126_1175	No	NA	360	CQ	Chloroquine	600 mg d0 + 300 mg d1	900 mg	India	Wild - Dehli, India	P14	P14_126	126	1998	Adak et al, 1998	Outpatients	28.6376	77.2235	8	Frequent relapse + long latency	Frequent relapse + long latency, Old World	Old World	tropical	Old World, tropical
126_1176	No	NA	360	CQ	Chloroquine	600 mg d0 + 300 mg d1	900 mg	India	Wild - Dehli, India	P14	P14_126	126	1998	Adak et al, 1998	Outpatients	28.6376	77.2235	8	Frequent relapse + long latency	Frequent relapse + long latency, Old World	Old World	tropical	Old World, tropical
126_1177	No	NA	360	CQ	Chloroquine	600 mg d0 + 300 mg d1	900 mg	India	Wild - Dehli, India	P14	P14_126	126	1998	Adak et al, 1998	Outpatients	28.6376	77.2235	8	Frequent relapse + long latency	Frequent relapse + long latency, Old World	Old World	tropical	Old World, tropical
126_1178	No	NA	360	CQ	Chloroquine	600 mg d0 + 300 mg d1	900 mg	India	Wild - Dehli, India	P14	P14_126	126	1998	Adak et al, 1998	Outpatients	28.6376	77.2235	8	Frequent relapse + long latency	Frequent relapse + long latency, Old World	Old World	tropical	Old World, tropical
126_1179	No	NA	360	CQ	Chloroquine	600 mg d0 + 300 mg d1	900 mg	India	Wild - Dehli, India	P14	P14_126	126	1998	Adak et al, 1998	Outpatients	28.6376	77.2235	8	Frequent relapse + long latency	Frequent relapse + long latency, Old World	Old World	tropical	Old World, tropical
126_118	Yes	60	60	CQ	Chloroquine	600 mg d0 + 300 mg d1	900 mg	India	Wild - Dehli, India	P14	P14_126	126	1998	Adak et al, 1998	Outpatients	28.6376	77.2235	8	Frequent relapse + long latency	Frequent relapse + long latency, Old World	Old World	tropical	Old World, tropical
126_1180	No	NA	360	CQ	Chloroquine	600 mg d0 + 300 mg d1	900 mg	India	Wild - Dehli, India	P14	P14_126	126	1998	Adak et al, 1998	Outpatients	28.6376	77.2235	8	Frequent relapse + long latency	Frequent relapse + long latency, Old World	Old World	tropical	Old World, tropical
126_1181	No	NA	360	CQ	Chloroquine	600 mg d0 + 300 mg d1	900 mg	India	Wild - Dehli, India	P14	P14_126	126	1998	Adak et al, 1998	Outpatients	28.6376	77.2235	8	Frequent relapse + long latency	Frequent relapse + long latency, Old World	Old World	tropical	Old World, tropical
126_1182	No	NA	360	CQ	Chloroquine	600 mg d0 + 300 mg d1	900 mg	India	Wild - Dehli, India	P14	P14_126	126	1998	Adak et al, 1998	Outpatients	28.6376	77.2235	8	Frequent relapse + long latency	Frequent relapse + long latency, Old World	Old World	tropical	Old World, tropical
126_1183	No	NA	360	CQ	Chloroquine	600 mg d0 + 300 mg d1	900 mg	India	Wild - Dehli, India	P14	P14_126	126	1998	Adak et al, 1998	Outpatients	28.6376	77.2235	8	Frequent relapse + long latency	Frequent relapse + long latency, Old World	Old World	tropical	Old World, tropical
126_1184	No	NA	360	CQ	Chloroquine	600 mg d0 + 300 mg d1	900 mg	India	Wild - Dehli, India	P14	P14_126	126	1998	Adak et al, 1998	Outpatients	28.6376	77.2235	8	Frequent relapse + long latency	Frequent relapse + long latency, Old World	Old World	tropical	Old World, tropical
126_1185	No	NA	360	CQ	Chloroquine	600 mg d0 + 300 mg d1	900 mg	India	Wild - Dehli, India	P14	P14_126	126	1998	Adak et al, 1998	Outpatients	28.6376	77.2235	8	Frequent relapse + long latency	Frequent relapse + long latency, Old World	Old World	tropical	Old World, tropical
126_1186	No	NA	360	CQ	Chloroquine	600 mg d0 + 300 mg d1	900 mg	India	Wild - Dehli, India	P14	P14_126	126	1998	Adak et al, 1998	Outpatients	28.6376	77.2235	8	Frequent relapse + long latency	Frequent relapse + long latency, Old World	Old World	tropical	Old World, tropical
126_1187	No	NA	360	CQ	Chloroquine	600 mg d0 + 300 mg d1	900 mg	India	Wild - Dehli, India	P14	P14_126	126	1998	Adak et al, 1998	Outpatients	28.6376	77.2235	8	Frequent relapse + long latency	Frequent relapse + long latency, Old World	Old World	tropical	Old World, tropical
126_1188	No	NA	360	CQ	Chloroquine	600 mg d0 + 300 mg d1	900 mg	India	Wild - Dehli, India	P14	P14_126	126	1998	Adak et al, 1998	Outpatients	28.6376	77.2235	8	Frequent relapse + long latency	Frequent relapse + long latency, Old World	Old World	tropical	Old World, tropical
126_1189	No	NA	360	CQ	Chloroquine	600 mg d0 + 300 mg d1	900 mg	India	Wild - Dehli, India	P14	P14_126	126	1998	Adak et al, 1998	Outpatients	28.6376	77.2235	8	Frequent relapse + long latency	Frequent relapse + long latency, Old World	Old World	tropical	Old World, tropical
126_119	Yes	60	60	CQ	Chloroquine	600 mg d0 + 300 mg d1	900 mg	India	Wild - Dehli, India	P14	P14_126	126	1998	Adak et al, 1998	Outpatients	28.6376	77.2235	8	Frequent relapse + long latency	Frequent relapse + long latency, Old World	Old World	tropical	Old World, tropical
126_1190	No	NA	360	CQ	Chloroquine	600 mg d0 + 300 mg d1	900 mg	India	Wild - Dehli, India	P14	P14_126	126	1998	Adak et al, 1998	Outpatients	28.6376	77.2235	8	Frequent relapse + long latency	Frequent relapse + long latency, Old World	Old World	tropical	Old World, tropical
126_1191	No	NA	360	CQ	Chloroquine	600 mg d0 + 300 mg d1	900 mg	India	Wild - Dehli, India	P14	P14_126	126	1998	Adak et al, 1998	Outpatients	28.6376	77.2235	8	Frequent relapse + long latency	Frequent relapse + long latency, Old World	Old World	tropical	Old World, tropical
126_1192	No	NA	360	CQ	Chloroquine	600 mg d0 + 300 mg d1	900 mg	India	Wild - Dehli, India	P14	P14_126	126	1998	Adak et al, 1998	Outpatients	28.6376	77.2235	8	Frequent relapse + long latency	Frequent relapse + long latency, Old World	Old World	tropical	Old World, tropical
126_1193	No	NA	360	CQ	Chloroquine	600 mg d0 + 300 mg d1	900 mg	India	Wild - Dehli, India	P14	P14_126	126	1998	Adak et al, 1998	Outpatients	28.6376	77.2235	8	Frequent relapse + long latency	Frequent relapse + long latency, Old World	Old World	tropical	Old World, tropical
126_1194	No	NA	360	CQ	Chloroquine	600 mg d0 + 300 mg d1	900 mg	India	Wild - Dehli, India	P14	P14_126	126	1998	Adak et al, 1998	Outpatients	28.6376	77.2235	8	Frequent relapse + long latency	Frequent relapse + long latency, Old World	Old World	tropical	Old World, tropical
126_1195	No	NA	360	CQ	Chloroquine	600 mg d0 + 300 mg d1	900 mg	India	Wild - Dehli, India	P14	P14_126	126	1998	Adak et al, 1998	Outpatients	28.6376	77.2235	8	Frequent relapse + long latency	Frequent relapse + long latency, Old World	Old World	tropical	Old World, tropical
126_1196	No	NA	360	CQ	Chloroquine	600 mg d0 + 300 mg d1	900 mg	India	Wild - Dehli, India	P14	P14_126	126	1998	Adak et al, 1998	Outpatients	28.6376	77.2235	8	Frequent relapse + long latency	Frequent relapse + long latency, Old World	Old World	tropical	Old World, tropical
126_1197	No	NA	360	CQ	Chloroquine	600 mg d0 + 300 mg d1	900 mg	India	Wild - Dehli, India	P14	P14_126	126	1998	Adak et al, 1998	Outpatients	28.6376	77.2235	8	Frequent relapse + long latency	Frequent relapse + long latency, Old World	Old World	tropical	Old World, tropical
126_1198	No	NA	360	CQ	Chloroquine	600 mg d0 + 300 mg d1	900 mg	India	Wild - Dehli, India	P14	P14_126	126	1998	Adak et al, 1998	Outpatients	28.6376	77.2235	8	Frequent relapse + long latency	Frequent relapse + long latency, Old World	Old World	tropical	Old World, tropical
126_1199	No	NA	360	CQ	Chloroquine	600 mg d0 + 300 mg d1	900 mg	India	Wild - Dehli, India	P14	P14_126	126	1998	Adak et al, 1998	Outpatients	28.6376	77.2235	8	Frequent relapse + long latency	Frequent relapse + long latency, Old World	Old World	tropical	Old World, tropical
126_12	Yes	30	30	CQ	Chloroquine	600 mg d0 + 300 mg d1	900 mg	India	Wild - Dehli, India	P14	P14_126	126	1998	Adak et al, 1998	Outpatients	28.6376	77.2235	8	Frequent relapse + long latency	Frequent relapse + long latency, Old World	Old World	tropical	Old World, tropical
126_120	Yes	60	60	CQ	Chloroquine	600 mg d0 + 300 mg d1	900 mg	India	Wild - Dehli, India	P14	P14_126	126	1998	Adak et al, 1998	Outpatients	28.6376	77.2235	8	Frequent relapse + long latency	Frequent relapse + long latency, Old World	Old World	tropical	Old World, tropical
126_1200	No	NA	360	CQ	Chloroquine	600 mg d0 + 300 mg d1	900 mg	India	Wild - Dehli, India	P14	P14_126	126	1998	Adak et al, 1998	Outpatients	28.6376	77.2235	8	Frequent relapse + long latency	Frequent relapse + long latency, Old World	Old World	tropical	Old World, tropical
126_1201	No	NA	360	CQ	Chloroquine	600 mg d0 + 300 mg d1	900 mg	India	Wild - Dehli, India	P14	P14_126	126	1998	Adak et al, 1998	Outpatients	28.6376	77.2235	8	Frequent relapse + long latency	Frequent relapse + long latency, Old World	Old World	tropical	Old World, tropical
126_1202	No	NA	360	CQ	Chloroquine	600 mg d0 + 300 mg d1	900 mg	India	Wild - Dehli, India	P14	P14_126	126	1998	Adak et al, 1998	Outpatients	28.6376	77.2235	8	Frequent relapse + long latency	Frequent relapse + long latency, Old World	Old World	tropical	Old World, tropical
126_1203	No	NA	360	CQ	Chloroquine	600 mg d0 + 300 mg d1	900 mg	India	Wild - Dehli, India	P14	P14_126	126	1998	Adak et al, 1998	Outpatients	28.6376	77.2235	8	Frequent relapse + long latency	Frequent relapse + long latency, Old World	Old World	tropical	Old World, tropical
126_1204	No	NA	360	CQ	Chloroquine	600 mg d0 + 300 mg d1	900 mg	India	Wild - Dehli, India	P14	P14_126	126	1998	Adak et al, 1998	Outpatients	28.6376	77.2235	8	Frequent relapse + long latency	Frequent relapse + long latency, Old World	Old World	tropical	Old World, tropical
126_1205	No	NA	360	CQ	Chloroquine	600 mg d0 + 300 mg d1	900 mg	India	Wild - Dehli, India	P14	P14_126	126	1998	Adak et al, 1998	Outpatients	28.6376	77.2235	8	Frequent relapse + long latency	Frequent relapse + long latency, Old World	Old World	tropical	Old World, tropical
126_1206	No	NA	360	CQ	Chloroquine	600 mg d0 + 300 mg d1	900 mg	India	Wild - Dehli, India	P14	P14_126	126	1998	Adak et al, 1998	Outpatients	28.6376	77.2235	8	Frequent relapse + long latency	Frequent relapse + long latency, Old World	Old World	tropical	Old World, tropical
126_1207	No	NA	360	CQ	Chloroquine	600 mg d0 + 300 mg d1	900 mg	India	Wild - Dehli, India	P14	P14_126	126	1998	Adak et al, 1998	Outpatients	28.6376	77.2235	8	Frequent relapse + long latency	Frequent relapse + long latency, Old World	Old World	tropical	Old World, tropical
126_1208	No	NA	360	CQ	Chloroquine	600 mg d0 + 300 mg d1	900 mg	India	Wild - Dehli, India	P14	P14_126	126	1998	Adak et al, 1998	Outpatients	28.6376	77.2235	8	Frequent relapse + long latency	Frequent relapse + long latency, Old World	Old World	tropical	Old World, tropical
126_1209	No	NA	360	CQ	Chloroquine	600 mg d0 + 300 mg d1	900 mg	India	Wild - Dehli, India	P14	P14_126	126	1998	Adak et al, 1998	Outpatients	28.6376	77.2235	8	Frequent relapse + long latency	Frequent relapse + long latency, Old World	Old World	tropical	Old World, tropical
126_121	Yes	60	60	CQ	Chloroquine	600 mg d0 + 300 mg d1	900 mg	India	Wild - Dehli, India	P14	P14_126	126	1998	Adak et al, 1998	Outpatients	28.6376	77.2235	8	Frequent relapse + long latency	Frequent relapse + long latency, Old World	Old World	tropical	Old World, tropical
126_1210	No	NA	360	CQ	Chloroquine	600 mg d0 + 300 mg d1	900 mg	India	Wild - Dehli, India	P14	P14_126	126	1998	Adak et al, 1998	Outpatients	28.6376	77.2235	8	Frequent relapse + long latency	Frequent relapse + long latency, Old World	Old World	tropical	Old World, tropical
126_1211	No	NA	360	CQ	Chloroquine	600 mg d0 + 300 mg d1	900 mg	India	Wild - Dehli, India	P14	P14_126	126	1998	Adak et al, 1998	Outpatients	28.6376	77.2235	8	Frequent relapse + long latency	Frequent relapse + long latency, Old World	Old World	tropical	Old World, tropical
126_1212	No	NA	360	CQ	Chloroquine	600 mg d0 + 300 mg d1	900 mg	India	Wild - Dehli, India	P14	P14_126	126	1998	Adak et al, 1998	Outpatients	28.6376	77.2235	8	Frequent relapse + long latency	Frequent relapse + long latency, Old World	Old World	tropical	Old World, tropical
126_1213	No	NA	360	CQ	Chloroquine	600 mg d0 + 300 mg d1	900 mg	India	Wild - Dehli, India	P14	P14_126	126	1998	Adak et al, 1998	Outpatients	28.6376	77.2235	8	Frequent relapse + long latency	Frequent relapse + long latency, Old World	Old World	tropical	Old World, tropical
126_1214	No	NA	360	CQ	Chloroquine	600 mg d0 + 300 mg d1	900 mg	India	Wild - Dehli, India	P14	P14_126	126	1998	Adak et al, 1998	Outpatients	28.6376	77.2235	8	Frequent relapse + long latency	Frequent relapse + long latency, Old World	Old World	tropical	Old World, tropical
126_1215	No	NA	360	CQ	Chloroquine	600 mg d0 + 300 mg d1	900 mg	India	Wild - Dehli, India	P14	P14_126	126	1998	Adak et al, 1998	Outpatients	28.6376	77.2235	8	Frequent relapse + long latency	Frequent relapse + long latency, Old World	Old World	tropical	Old World, tropical
126_1216	No	NA	360	CQ	Chloroquine	600 mg d0 + 300 mg d1	900 mg	India	Wild - Dehli, India	P14	P14_126	126	1998	Adak et al, 1998	Outpatients	28.6376	77.2235	8	Frequent relapse + long latency	Frequent relapse + long latency, Old World	Old World	tropical	Old World, tropical
126_1217	No	NA	360	CQ	Chloroquine	600 mg d0 + 300 mg d1	900 mg	India	Wild - Dehli, India	P14	P14_126	126	1998	Adak et al, 1998	Outpatients	28.6376	77.2235	8	Frequent relapse + long latency	Frequent relapse + long latency, Old World	Old World	tropical	Old World, tropical
126_1218	No	NA	360	CQ	Chloroquine	600 mg d0 + 300 mg d1	900 mg	India	Wild - Dehli, India	P14	P14_126	126	1998	Adak et al, 1998	Outpatients	28.6376	77.2235	8	Frequent relapse + long latency	Frequent relapse + long latency, Old World	Old World	tropical	Old World, tropical
126_1219	No	NA	360	CQ	Chloroquine	600 mg d0 + 300 mg d1	900 mg	India	Wild - Dehli, India	P14	P14_126	126	1998	Adak et al, 1998	Outpatients	28.6376	77.2235	8	Frequent relapse + long latency	Frequent relapse + long latency, Old World	Old World	tropical	Old World, tropical
126_122	Yes	60	60	CQ	Chloroquine	600 mg d0 + 300 mg d1	900 mg	India	Wild - Dehli, India	P14	P14_126	126	1998	Adak et al, 1998	Outpatients	28.6376	77.2235	8	Frequent relapse + long latency	Frequent relapse + long latency, Old World	Old World	tropical	Old World, tropical
126_1220	No	NA	360	CQ	Chloroquine	600 mg d0 + 300 mg d1	900 mg	India	Wild - Dehli, India	P14	P14_126	126	1998	Adak et al, 1998	Outpatients	28.6376	77.2235	8	Frequent relapse + long latency	Frequent relapse + long latency, Old World	Old World	tropical	Old World, tropical
126_1221	No	NA	360	CQ	Chloroquine	600 mg d0 + 300 mg d1	900 mg	India	Wild - Dehli, India	P14	P14_126	126	1998	Adak et al, 1998	Outpatients	28.6376	77.2235	8	Frequent relapse + long latency	Frequent relapse + long latency, Old World	Old World	tropical	Old World, tropical
126_1222	No	NA	360	CQ	Chloroquine	600 mg d0 + 300 mg d1	900 mg	India	Wild - Dehli, India	P14	P14_126	126	1998	Adak et al, 1998	Outpatients	28.6376	77.2235	8	Frequent relapse + long latency	Frequent relapse + long latency, Old World	Old World	tropical	Old World, tropical
126_1223	No	NA	360	CQ	Chloroquine	600 mg d0 + 300 mg d1	900 mg	India	Wild - Dehli, India	P14	P14_126	126	1998	Adak et al, 1998	Outpatients	28.6376	77.2235	8	Frequent relapse + long latency	Frequent relapse + long latency, Old World	Old World	tropical	Old World, tropical
126_1224	No	NA	360	CQ	Chloroquine	600 mg d0 + 300 mg d1	900 mg	India	Wild - Dehli, India	P14	P14_126	126	1998	Adak et al, 1998	Outpatients	28.6376	77.2235	8	Frequent relapse + long latency	Frequent relapse + long latency, Old World	Old World	tropical	Old World, tropical
126_1225	No	NA	360	CQ	Chloroquine	600 mg d0 + 300 mg d1	900 mg	India	Wild - Dehli, India	P14	P14_126	126	1998	Adak et al, 1998	Outpatients	28.6376	77.2235	8	Frequent relapse + long latency	Frequent relapse + long latency, Old World	Old World	tropical	Old World, tropical
126_1226	No	NA	360	CQ	Chloroquine	600 mg d0 + 300 mg d1	900 mg	India	Wild - Dehli, India	P14	P14_126	126	1998	Adak et al, 1998	Outpatients	28.6376	77.2235	8	Frequent relapse + long latency	Frequent relapse + long latency, Old World	Old World	tropical	Old World, tropical
126_1227	No	NA	360	CQ	Chloroquine	600 mg d0 + 300 mg d1	900 mg	India	Wild - Dehli, India	P14	P14_126	126	1998	Adak et al, 1998	Outpatients	28.6376	77.2235	8	Frequent relapse + long latency	Frequent relapse + long latency, Old World	Old World	tropical	Old World, tropical
126_1228	No	NA	360	CQ	Chloroquine	600 mg d0 + 300 mg d1	900 mg	India	Wild - Dehli, India	P14	P14_126	126	1998	Adak et al, 1998	Outpatients	28.6376	77.2235	8	Frequent relapse + long latency	Frequent relapse + long latency, Old World	Old World	tropical	Old World, tropical
126_1229	No	NA	360	CQ	Chloroquine	600 mg d0 + 300 mg d1	900 mg	India	Wild - Dehli, India	P14	P14_126	126	1998	Adak et al, 1998	Outpatients	28.6376	77.2235	8	Frequent relapse + long latency	Frequent relapse + long latency, Old World	Old World	tropical	Old World, tropical
126_123	Yes	60	60	CQ	Chloroquine	600 mg d0 + 300 mg d1	900 mg	India	Wild - Dehli, India	P14	P14_126	126	1998	Adak et al, 1998	Outpatients	28.6376	77.2235	8	Frequent relapse + long latency	Frequent relapse + long latency, Old World	Old World	tropical	Old World, tropical
126_1230	No	NA	360	CQ	Chloroquine	600 mg d0 + 300 mg d1	900 mg	India	Wild - Dehli, India	P14	P14_126	126	1998	Adak et al, 1998	Outpatients	28.6376	77.2235	8	Frequent relapse + long latency	Frequent relapse + long latency, Old World	Old World	tropical	Old World, tropical
126_1231	No	NA	360	CQ	Chloroquine	600 mg d0 + 300 mg d1	900 mg	India	Wild - Dehli, India	P14	P14_126	126	1998	Adak et al, 1998	Outpatients	28.6376	77.2235	8	Frequent relapse + long latency	Frequent relapse + long latency, Old World	Old World	tropical	Old World, tropical
126_1232	No	NA	360	CQ	Chloroquine	600 mg d0 + 300 mg d1	900 mg	India	Wild - Dehli, India	P14	P14_126	126	1998	Adak et al, 1998	Outpatients	28.6376	77.2235	8	Frequent relapse + long latency	Frequent relapse + long latency, Old World	Old World	tropical	Old World, tropical
126_1233	No	NA	360	CQ	Chloroquine	600 mg d0 + 300 mg d1	900 mg	India	Wild - Dehli, India	P14	P14_126	126	1998	Adak et al, 1998	Outpatients	28.6376	77.2235	8	Frequent relapse + long latency	Frequent relapse + long latency, Old World	Old World	tropical	Old World, tropical
126_1234	No	NA	360	CQ	Chloroquine	600 mg d0 + 300 mg d1	900 mg	India	Wild - Dehli, India	P14	P14_126	126	1998	Adak et al, 1998	Outpatients	28.6376	77.2235	8	Frequent relapse + long latency	Frequent relapse + long latency, Old World	Old World	tropical	Old World, tropical
126_1235	No	NA	360	CQ	Chloroquine	600 mg d0 + 300 mg d1	900 mg	India	Wild - Dehli, India	P14	P14_126	126	1998	Adak et al, 1998	Outpatients	28.6376	77.2235	8	Frequent relapse + long latency	Frequent relapse + long latency, Old World	Old World	tropical	Old World, tropical
126_1236	No	NA	360	CQ	Chloroquine	600 mg d0 + 300 mg d1	900 mg	India	Wild - Dehli, India	P14	P14_126	126	1998	Adak et al, 1998	Outpatients	28.6376	77.2235	8	Frequent relapse + long latency	Frequent relapse + long latency, Old World	Old World	tropical	Old World, tropical
126_1237	No	NA	360	CQ	Chloroquine	600 mg d0 + 300 mg d1	900 mg	India	Wild - Dehli, India	P14	P14_126	126	1998	Adak et al, 1998	Outpatients	28.6376	77.2235	8	Frequent relapse + long latency	Frequent relapse + long latency, Old World	Old World	tropical	Old World, tropical
126_1238	No	NA	360	CQ	Chloroquine	600 mg d0 + 300 mg d1	900 mg	India	Wild - Dehli, India	P14	P14_126	126	1998	Adak et al, 1998	Outpatients	28.6376	77.2235	8	Frequent relapse + long latency	Frequent relapse + long latency, Old World	Old World	tropical	Old World, tropical
126_1239	No	NA	360	CQ	Chloroquine	600 mg d0 + 300 mg d1	900 mg	India	Wild - Dehli, India	P14	P14_126	126	1998	Adak et al, 1998	Outpatients	28.6376	77.2235	8	Frequent relapse + long latency	Frequent relapse + long latency, Old World	Old World	tropical	Old World, tropical
126_124	Yes	60	60	CQ	Chloroquine	600 mg d0 + 300 mg d1	900 mg	India	Wild - Dehli, India	P14	P14_126	126	1998	Adak et al, 1998	Outpatients	28.6376	77.2235	8	Frequent relapse + long latency	Frequent relapse + long latency, Old World	Old World	tropical	Old World, tropical
126_1240	No	NA	360	CQ	Chloroquine	600 mg d0 + 300 mg d1	900 mg	India	Wild - Dehli, India	P14	P14_126	126	1998	Adak et al, 1998	Outpatients	28.6376	77.2235	8	Frequent relapse + long latency	Frequent relapse + long latency, Old World	Old World	tropical	Old World, tropical
126_1241	No	NA	360	CQ	Chloroquine	600 mg d0 + 300 mg d1	900 mg	India	Wild - Dehli, India	P14	P14_126	126	1998	Adak et al, 1998	Outpatients	28.6376	77.2235	8	Frequent relapse + long latency	Frequent relapse + long latency, Old World	Old World	tropical	Old World, tropical
126_1242	No	NA	360	CQ	Chloroquine	600 mg d0 + 300 mg d1	900 mg	India	Wild - Dehli, India	P14	P14_126	126	1998	Adak et al, 1998	Outpatients	28.6376	77.2235	8	Frequent relapse + long latency	Frequent relapse + long latency, Old World	Old World	tropical	Old World, tropical
126_1243	No	NA	360	CQ	Chloroquine	600 mg d0 + 300 mg d1	900 mg	India	Wild - Dehli, India	P14	P14_126	126	1998	Adak et al, 1998	Outpatients	28.6376	77.2235	8	Frequent relapse + long latency	Frequent relapse + long latency, Old World	Old World	tropical	Old World, tropical
126_1244	No	NA	360	CQ	Chloroquine	600 mg d0 + 300 mg d1	900 mg	India	Wild - Dehli, India	P14	P14_126	126	1998	Adak et al, 1998	Outpatients	28.6376	77.2235	8	Frequent relapse + long latency	Frequent relapse + long latency, Old World	Old World	tropical	Old World, tropical
126_1245	No	NA	360	CQ	Chloroquine	600 mg d0 + 300 mg d1	900 mg	India	Wild - Dehli, India	P14	P14_126	126	1998	Adak et al, 1998	Outpatients	28.6376	77.2235	8	Frequent relapse + long latency	Frequent relapse + long latency, Old World	Old World	tropical	Old World, tropical
126_1246	No	NA	360	CQ	Chloroquine	600 mg d0 + 300 mg d1	900 mg	India	Wild - Dehli, India	P14	P14_126	126	1998	Adak et al, 1998	Outpatients	28.6376	77.2235	8	Frequent relapse + long latency	Frequent relapse + long latency, Old World	Old World	tropical	Old World, tropical
126_1247	No	NA	360	CQ	Chloroquine	600 mg d0 + 300 mg d1	900 mg	India	Wild - Dehli, India	P14	P14_126	126	1998	Adak et al, 1998	Outpatients	28.6376	77.2235	8	Frequent relapse + long latency	Frequent relapse + long latency, Old World	Old World	tropical	Old World, tropical
126_1248	No	NA	360	CQ	Chloroquine	600 mg d0 + 300 mg d1	900 mg	India	Wild - Dehli, India	P14	P14_126	126	1998	Adak et al, 1998	Outpatients	28.6376	77.2235	8	Frequent relapse + long latency	Frequent relapse + long latency, Old World	Old World	tropical	Old World, tropical
126_1249	No	NA	360	CQ	Chloroquine	600 mg d0 + 300 mg d1	900 mg	India	Wild - Dehli, India	P14	P14_126	126	1998	Adak et al, 1998	Outpatients	28.6376	77.2235	8	Frequent relapse + long latency	Frequent relapse + long latency, Old World	Old World	tropical	Old World, tropical
126_125	Yes	60	60	CQ	Chloroquine	600 mg d0 + 300 mg d1	900 mg	India	Wild - Dehli, India	P14	P14_126	126	1998	Adak et al, 1998	Outpatients	28.6376	77.2235	8	Frequent relapse + long latency	Frequent relapse + long latency, Old World	Old World	tropical	Old World, tropical
126_1250	No	NA	360	CQ	Chloroquine	600 mg d0 + 300 mg d1	900 mg	India	Wild - Dehli, India	P14	P14_126	126	1998	Adak et al, 1998	Outpatients	28.6376	77.2235	8	Frequent relapse + long latency	Frequent relapse + long latency, Old World	Old World	tropical	Old World, tropical
126_1251	No	NA	360	CQ	Chloroquine	600 mg d0 + 300 mg d1	900 mg	India	Wild - Dehli, India	P14	P14_126	126	1998	Adak et al, 1998	Outpatients	28.6376	77.2235	8	Frequent relapse + long latency	Frequent relapse + long latency, Old World	Old World	tropical	Old World, tropical
126_1252	No	NA	360	CQ	Chloroquine	600 mg d0 + 300 mg d1	900 mg	India	Wild - Dehli, India	P14	P14_126	126	1998	Adak et al, 1998	Outpatients	28.6376	77.2235	8	Frequent relapse + long latency	Frequent relapse + long latency, Old World	Old World	tropical	Old World, tropical
126_1253	No	NA	360	CQ	Chloroquine	600 mg d0 + 300 mg d1	900 mg	India	Wild - Dehli, India	P14	P14_126	126	1998	Adak et al, 1998	Outpatients	28.6376	77.2235	8	Frequent relapse + long latency	Frequent relapse + long latency, Old World	Old World	tropical	Old World, tropical
126_1254	No	NA	360	CQ	Chloroquine	600 mg d0 + 300 mg d1	900 mg	India	Wild - Dehli, India	P14	P14_126	126	1998	Adak et al, 1998	Outpatients	28.6376	77.2235	8	Frequent relapse + long latency	Frequent relapse + long latency, Old World	Old World	tropical	Old World, tropical
126_1255	No	NA	360	CQ	Chloroquine	600 mg d0 + 300 mg d1	900 mg	India	Wild - Dehli, India	P14	P14_126	126	1998	Adak et al, 1998	Outpatients	28.6376	77.2235	8	Frequent relapse + long latency	Frequent relapse + long latency, Old World	Old World	tropical	Old World, tropical
126_1256	No	NA	360	CQ	Chloroquine	600 mg d0 + 300 mg d1	900 mg	India	Wild - Dehli, India	P14	P14_126	126	1998	Adak et al, 1998	Outpatients	28.6376	77.2235	8	Frequent relapse + long latency	Frequent relapse + long latency, Old World	Old World	tropical	Old World, tropical
126_1257	No	NA	360	CQ	Chloroquine	600 mg d0 + 300 mg d1	900 mg	India	Wild - Dehli, India	P14	P14_126	126	1998	Adak et al, 1998	Outpatients	28.6376	77.2235	8	Frequent relapse + long latency	Frequent relapse + long latency, Old World	Old World	tropical	Old World, tropical
126_1258	No	NA	360	CQ	Chloroquine	600 mg d0 + 300 mg d1	900 mg	India	Wild - Dehli, India	P14	P14_126	126	1998	Adak et al, 1998	Outpatients	28.6376	77.2235	8	Frequent relapse + long latency	Frequent relapse + long latency, Old World	Old World	tropical	Old World, tropical
126_1259	No	NA	360	CQ	Chloroquine	600 mg d0 + 300 mg d1	900 mg	India	Wild - Dehli, India	P14	P14_126	126	1998	Adak et al, 1998	Outpatients	28.6376	77.2235	8	Frequent relapse + long latency	Frequent relapse + long latency, Old World	Old World	tropical	Old World, tropical
126_126	Yes	60	60	CQ	Chloroquine	600 mg d0 + 300 mg d1	900 mg	India	Wild - Dehli, India	P14	P14_126	126	1998	Adak et al, 1998	Outpatients	28.6376	77.2235	8	Frequent relapse + long latency	Frequent relapse + long latency, Old World	Old World	tropical	Old World, tropical
126_1260	No	NA	360	CQ	Chloroquine	600 mg d0 + 300 mg d1	900 mg	India	Wild - Dehli, India	P14	P14_126	126	1998	Adak et al, 1998	Outpatients	28.6376	77.2235	8	Frequent relapse + long latency	Frequent relapse + long latency, Old World	Old World	tropical	Old World, tropical
126_1261	No	NA	360	CQ	Chloroquine	600 mg d0 + 300 mg d1	900 mg	India	Wild - Dehli, India	P14	P14_126	126	1998	Adak et al, 1998	Outpatients	28.6376	77.2235	8	Frequent relapse + long latency	Frequent relapse + long latency, Old World	Old World	tropical	Old World, tropical
126_1262	No	NA	360	CQ	Chloroquine	600 mg d0 + 300 mg d1	900 mg	India	Wild - Dehli, India	P14	P14_126	126	1998	Adak et al, 1998	Outpatients	28.6376	77.2235	8	Frequent relapse + long latency	Frequent relapse + long latency, Old World	Old World	tropical	Old World, tropical
126_1263	No	NA	360	CQ	Chloroquine	600 mg d0 + 300 mg d1	900 mg	India	Wild - Dehli, India	P14	P14_126	126	1998	Adak et al, 1998	Outpatients	28.6376	77.2235	8	Frequent relapse + long latency	Frequent relapse + long latency, Old World	Old World	tropical	Old World, tropical
126_1264	No	NA	360	CQ	Chloroquine	600 mg d0 + 300 mg d1	900 mg	India	Wild - Dehli, India	P14	P14_126	126	1998	Adak et al, 1998	Outpatients	28.6376	77.2235	8	Frequent relapse + long latency	Frequent relapse + long latency, Old World	Old World	tropical	Old World, tropical
126_1265	No	NA	360	CQ	Chloroquine	600 mg d0 + 300 mg d1	900 mg	India	Wild - Dehli, India	P14	P14_126	126	1998	Adak et al, 1998	Outpatients	28.6376	77.2235	8	Frequent relapse + long latency	Frequent relapse + long latency, Old World	Old World	tropical	Old World, tropical
126_1266	No	NA	360	CQ	Chloroquine	600 mg d0 + 300 mg d1	900 mg	India	Wild - Dehli, India	P14	P14_126	126	1998	Adak et al, 1998	Outpatients	28.6376	77.2235	8	Frequent relapse + long latency	Frequent relapse + long latency, Old World	Old World	tropical	Old World, tropical
126_1267	No	NA	360	CQ	Chloroquine	600 mg d0 + 300 mg d1	900 mg	India	Wild - Dehli, India	P14	P14_126	126	1998	Adak et al, 1998	Outpatients	28.6376	77.2235	8	Frequent relapse + long latency	Frequent relapse + long latency, Old World	Old World	tropical	Old World, tropical
126_1268	No	NA	360	CQ	Chloroquine	600 mg d0 + 300 mg d1	900 mg	India	Wild - Dehli, India	P14	P14_126	126	1998	Adak et al, 1998	Outpatients	28.6376	77.2235	8	Frequent relapse + long latency	Frequent relapse + long latency, Old World	Old World	tropical	Old World, tropical
126_1269	No	NA	360	CQ	Chloroquine	600 mg d0 + 300 mg d1	900 mg	India	Wild - Dehli, India	P14	P14_126	126	1998	Adak et al, 1998	Outpatients	28.6376	77.2235	8	Frequent relapse + long latency	Frequent relapse + long latency, Old World	Old World	tropical	Old World, tropical
126_127	Yes	60	60	CQ	Chloroquine	600 mg d0 + 300 mg d1	900 mg	India	Wild - Dehli, India	P14	P14_126	126	1998	Adak et al, 1998	Outpatients	28.6376	77.2235	8	Frequent relapse + long latency	Frequent relapse + long latency, Old World	Old World	tropical	Old World, tropical
126_1270	No	NA	360	CQ	Chloroquine	600 mg d0 + 300 mg d1	900 mg	India	Wild - Dehli, India	P14	P14_126	126	1998	Adak et al, 1998	Outpatients	28.6376	77.2235	8	Frequent relapse + long latency	Frequent relapse + long latency, Old World	Old World	tropical	Old World, tropical
126_1271	No	NA	360	CQ	Chloroquine	600 mg d0 + 300 mg d1	900 mg	India	Wild - Dehli, India	P14	P14_126	126	1998	Adak et al, 1998	Outpatients	28.6376	77.2235	8	Frequent relapse + long latency	Frequent relapse + long latency, Old World	Old World	tropical	Old World, tropical
126_1272	No	NA	360	CQ	Chloroquine	600 mg d0 + 300 mg d1	900 mg	India	Wild - Dehli, India	P14	P14_126	126	1998	Adak et al, 1998	Outpatients	28.6376	77.2235	8	Frequent relapse + long latency	Frequent relapse + long latency, Old World	Old World	tropical	Old World, tropical
126_1273	No	NA	360	CQ	Chloroquine	600 mg d0 + 300 mg d1	900 mg	India	Wild - Dehli, India	P14	P14_126	126	1998	Adak et al, 1998	Outpatients	28.6376	77.2235	8	Frequent relapse + long latency	Frequent relapse + long latency, Old World	Old World	tropical	Old World, tropical
126_1274	No	NA	360	CQ	Chloroquine	600 mg d0 + 300 mg d1	900 mg	India	Wild - Dehli, India	P14	P14_126	126	1998	Adak et al, 1998	Outpatients	28.6376	77.2235	8	Frequent relapse + long latency	Frequent relapse + long latency, Old World	Old World	tropical	Old World, tropical
126_1275	No	NA	360	CQ	Chloroquine	600 mg d0 + 300 mg d1	900 mg	India	Wild - Dehli, India	P14	P14_126	126	1998	Adak et al, 1998	Outpatients	28.6376	77.2235	8	Frequent relapse + long latency	Frequent relapse + long latency, Old World	Old World	tropical	Old World, tropical
126_1276	No	NA	360	CQ	Chloroquine	600 mg d0 + 300 mg d1	900 mg	India	Wild - Dehli, India	P14	P14_126	126	1998	Adak et al, 1998	Outpatients	28.6376	77.2235	8	Frequent relapse + long latency	Frequent relapse + long latency, Old World	Old World	tropical	Old World, tropical
126_1277	No	NA	360	CQ	Chloroquine	600 mg d0 + 300 mg d1	900 mg	India	Wild - Dehli, India	P14	P14_126	126	1998	Adak et al, 1998	Outpatients	28.6376	77.2235	8	Frequent relapse + long latency	Frequent relapse + long latency, Old World	Old World	tropical	Old World, tropical
126_1278	No	NA	360	CQ	Chloroquine	600 mg d0 + 300 mg d1	900 mg	India	Wild - Dehli, India	P14	P14_126	126	1998	Adak et al, 1998	Outpatients	28.6376	77.2235	8	Frequent relapse + long latency	Frequent relapse + long latency, Old World	Old World	tropical	Old World, tropical
126_1279	No	NA	360	CQ	Chloroquine	600 mg d0 + 300 mg d1	900 mg	India	Wild - Dehli, India	P14	P14_126	126	1998	Adak et al, 1998	Outpatients	28.6376	77.2235	8	Frequent relapse + long latency	Frequent relapse + long latency, Old World	Old World	tropical	Old World, tropical
126_128	Yes	60	60	CQ	Chloroquine	600 mg d0 + 300 mg d1	900 mg	India	Wild - Dehli, India	P14	P14_126	126	1998	Adak et al, 1998	Outpatients	28.6376	77.2235	8	Frequent relapse + long latency	Frequent relapse + long latency, Old World	Old World	tropical	Old World, tropical
126_1280	No	NA	360	CQ	Chloroquine	600 mg d0 + 300 mg d1	900 mg	India	Wild - Dehli, India	P14	P14_126	126	1998	Adak et al, 1998	Outpatients	28.6376	77.2235	8	Frequent relapse + long latency	Frequent relapse + long latency, Old World	Old World	tropical	Old World, tropical
126_1281	No	NA	360	CQ	Chloroquine	600 mg d0 + 300 mg d1	900 mg	India	Wild - Dehli, India	P14	P14_126	126	1998	Adak et al, 1998	Outpatients	28.6376	77.2235	8	Frequent relapse + long latency	Frequent relapse + long latency, Old World	Old World	tropical	Old World, tropical
126_1282	No	NA	360	CQ	Chloroquine	600 mg d0 + 300 mg d1	900 mg	India	Wild - Dehli, India	P14	P14_126	126	1998	Adak et al, 1998	Outpatients	28.6376	77.2235	8	Frequent relapse + long latency	Frequent relapse + long latency, Old World	Old World	tropical	Old World, tropical
126_1283	No	NA	360	CQ	Chloroquine	600 mg d0 + 300 mg d1	900 mg	India	Wild - Dehli, India	P14	P14_126	126	1998	Adak et al, 1998	Outpatients	28.6376	77.2235	8	Frequent relapse + long latency	Frequent relapse + long latency, Old World	Old World	tropical	Old World, tropical
126_1284	No	NA	360	CQ	Chloroquine	600 mg d0 + 300 mg d1	900 mg	India	Wild - Dehli, India	P14	P14_126	126	1998	Adak et al, 1998	Outpatients	28.6376	77.2235	8	Frequent relapse + long latency	Frequent relapse + long latency, Old World	Old World	tropical	Old World, tropical
126_1285	No	NA	360	CQ	Chloroquine	600 mg d0 + 300 mg d1	900 mg	India	Wild - Dehli, India	P14	P14_126	126	1998	Adak et al, 1998	Outpatients	28.6376	77.2235	8	Frequent relapse + long latency	Frequent relapse + long latency, Old World	Old World	tropical	Old World, tropical
126_1286	No	NA	360	CQ	Chloroquine	600 mg d0 + 300 mg d1	900 mg	India	Wild - Dehli, India	P14	P14_126	126	1998	Adak et al, 1998	Outpatients	28.6376	77.2235	8	Frequent relapse + long latency	Frequent relapse + long latency, Old World	Old World	tropical	Old World, tropical
126_1287	No	NA	360	CQ	Chloroquine	600 mg d0 + 300 mg d1	900 mg	India	Wild - Dehli, India	P14	P14_126	126	1998	Adak et al, 1998	Outpatients	28.6376	77.2235	8	Frequent relapse + long latency	Frequent relapse + long latency, Old World	Old World	tropical	Old World, tropical
126_1288	No	NA	360	CQ	Chloroquine	600 mg d0 + 300 mg d1	900 mg	India	Wild - Dehli, India	P14	P14_126	126	1998	Adak et al, 1998	Outpatients	28.6376	77.2235	8	Frequent relapse + long latency	Frequent relapse + long latency, Old World	Old World	tropical	Old World, tropical
126_1289	No	NA	360	CQ	Chloroquine	600 mg d0 + 300 mg d1	900 mg	India	Wild - Dehli, India	P14	P14_126	126	1998	Adak et al, 1998	Outpatients	28.6376	77.2235	8	Frequent relapse + long latency	Frequent relapse + long latency, Old World	Old World	tropical	Old World, tropical
126_129	Yes	60	60	CQ	Chloroquine	600 mg d0 + 300 mg d1	900 mg	India	Wild - Dehli, India	P14	P14_126	126	1998	Adak et al, 1998	Outpatients	28.6376	77.2235	8	Frequent relapse + long latency	Frequent relapse + long latency, Old World	Old World	tropical	Old World, tropical
126_1290	No	NA	360	CQ	Chloroquine	600 mg d0 + 300 mg d1	900 mg	India	Wild - Dehli, India	P14	P14_126	126	1998	Adak et al, 1998	Outpatients	28.6376	77.2235	8	Frequent relapse + long latency	Frequent relapse + long latency, Old World	Old World	tropical	Old World, tropical
126_1291	No	NA	360	CQ	Chloroquine	600 mg d0 + 300 mg d1	900 mg	India	Wild - Dehli, India	P14	P14_126	126	1998	Adak et al, 1998	Outpatients	28.6376	77.2235	8	Frequent relapse + long latency	Frequent relapse + long latency, Old World	Old World	tropical	Old World, tropical
126_1292	No	NA	360	CQ	Chloroquine	600 mg d0 + 300 mg d1	900 mg	India	Wild - Dehli, India	P14	P14_126	126	1998	Adak et al, 1998	Outpatients	28.6376	77.2235	8	Frequent relapse + long latency	Frequent relapse + long latency, Old World	Old World	tropical	Old World, tropical
126_1293	No	NA	360	CQ	Chloroquine	600 mg d0 + 300 mg d1	900 mg	India	Wild - Dehli, India	P14	P14_126	126	1998	Adak et al, 1998	Outpatients	28.6376	77.2235	8	Frequent relapse + long latency	Frequent relapse + long latency, Old World	Old World	tropical	Old World, tropical
126_1294	No	NA	360	CQ	Chloroquine	600 mg d0 + 300 mg d1	900 mg	India	Wild - Dehli, India	P14	P14_126	126	1998	Adak et al, 1998	Outpatients	28.6376	77.2235	8	Frequent relapse + long latency	Frequent relapse + long latency, Old World	Old World	tropical	Old World, tropical
126_1295	No	NA	360	CQ	Chloroquine	600 mg d0 + 300 mg d1	900 mg	India	Wild - Dehli, India	P14	P14_126	126	1998	Adak et al, 1998	Outpatients	28.6376	77.2235	8	Frequent relapse + long latency	Frequent relapse + long latency, Old World	Old World	tropical	Old World, tropical
126_1296	No	NA	360	CQ	Chloroquine	600 mg d0 + 300 mg d1	900 mg	India	Wild - Dehli, India	P14	P14_126	126	1998	Adak et al, 1998	Outpatients	28.6376	77.2235	8	Frequent relapse + long latency	Frequent relapse + long latency, Old World	Old World	tropical	Old World, tropical
126_1297	No	NA	360	CQ	Chloroquine	600 mg d0 + 300 mg d1	900 mg	India	Wild - Dehli, India	P14	P14_126	126	1998	Adak et al, 1998	Outpatients	28.6376	77.2235	8	Frequent relapse + long latency	Frequent relapse + long latency, Old World	Old World	tropical	Old World, tropical
126_1298	No	NA	360	CQ	Chloroquine	600 mg d0 + 300 mg d1	900 mg	India	Wild - Dehli, India	P14	P14_126	126	1998	Adak et al, 1998	Outpatients	28.6376	77.2235	8	Frequent relapse + long latency	Frequent relapse + long latency, Old World	Old World	tropical	Old World, tropical
126_1299	No	NA	360	CQ	Chloroquine	600 mg d0 + 300 mg d1	900 mg	India	Wild - Dehli, India	P14	P14_126	126	1998	Adak et al, 1998	Outpatients	28.6376	77.2235	8	Frequent relapse + long latency	Frequent relapse + long latency, Old World	Old World	tropical	Old World, tropical
126_13	Yes	30	30	CQ	Chloroquine	600 mg d0 + 300 mg d1	900 mg	India	Wild - Dehli, India	P14	P14_126	126	1998	Adak et al, 1998	Outpatients	28.6376	77.2235	8	Frequent relapse + long latency	Frequent relapse + long latency, Old World	Old World	tropical	Old World, tropical
126_130	Yes	60	60	CQ	Chloroquine	600 mg d0 + 300 mg d1	900 mg	India	Wild - Dehli, India	P14	P14_126	126	1998	Adak et al, 1998	Outpatients	28.6376	77.2235	8	Frequent relapse + long latency	Frequent relapse + long latency, Old World	Old World	tropical	Old World, tropical
126_1300	No	NA	360	CQ	Chloroquine	600 mg d0 + 300 mg d1	900 mg	India	Wild - Dehli, India	P14	P14_126	126	1998	Adak et al, 1998	Outpatients	28.6376	77.2235	8	Frequent relapse + long latency	Frequent relapse + long latency, Old World	Old World	tropical	Old World, tropical
126_1301	No	NA	360	CQ	Chloroquine	600 mg d0 + 300 mg d1	900 mg	India	Wild - Dehli, India	P14	P14_126	126	1998	Adak et al, 1998	Outpatients	28.6376	77.2235	8	Frequent relapse + long latency	Frequent relapse + long latency, Old World	Old World	tropical	Old World, tropical
126_1302	No	NA	360	CQ	Chloroquine	600 mg d0 + 300 mg d1	900 mg	India	Wild - Dehli, India	P14	P14_126	126	1998	Adak et al, 1998	Outpatients	28.6376	77.2235	8	Frequent relapse + long latency	Frequent relapse + long latency, Old World	Old World	tropical	Old World, tropical
126_1303	No	NA	360	CQ	Chloroquine	600 mg d0 + 300 mg d1	900 mg	India	Wild - Dehli, India	P14	P14_126	126	1998	Adak et al, 1998	Outpatients	28.6376	77.2235	8	Frequent relapse + long latency	Frequent relapse + long latency, Old World	Old World	tropical	Old World, tropical
126_1304	No	NA	360	CQ	Chloroquine	600 mg d0 + 300 mg d1	900 mg	India	Wild - Dehli, India	P14	P14_126	126	1998	Adak et al, 1998	Outpatients	28.6376	77.2235	8	Frequent relapse + long latency	Frequent relapse + long latency, Old World	Old World	tropical	Old World, tropical
126_1305	No	NA	360	CQ	Chloroquine	600 mg d0 + 300 mg d1	900 mg	India	Wild - Dehli, India	P14	P14_126	126	1998	Adak et al, 1998	Outpatients	28.6376	77.2235	8	Frequent relapse + long latency	Frequent relapse + long latency, Old World	Old World	tropical	Old World, tropical
126_1306	No	NA	360	CQ	Chloroquine	600 mg d0 + 300 mg d1	900 mg	India	Wild - Dehli, India	P14	P14_126	126	1998	Adak et al, 1998	Outpatients	28.6376	77.2235	8	Frequent relapse + long latency	Frequent relapse + long latency, Old World	Old World	tropical	Old World, tropical
126_1307	No	NA	360	CQ	Chloroquine	600 mg d0 + 300 mg d1	900 mg	India	Wild - Dehli, India	P14	P14_126	126	1998	Adak et al, 1998	Outpatients	28.6376	77.2235	8	Frequent relapse + long latency	Frequent relapse + long latency, Old World	Old World	tropical	Old World, tropical
126_1308	No	NA	360	CQ	Chloroquine	600 mg d0 + 300 mg d1	900 mg	India	Wild - Dehli, India	P14	P14_126	126	1998	Adak et al, 1998	Outpatients	28.6376	77.2235	8	Frequent relapse + long latency	Frequent relapse + long latency, Old World	Old World	tropical	Old World, tropical
126_1309	No	NA	360	CQ	Chloroquine	600 mg d0 + 300 mg d1	900 mg	India	Wild - Dehli, India	P14	P14_126	126	1998	Adak et al, 1998	Outpatients	28.6376	77.2235	8	Frequent relapse + long latency	Frequent relapse + long latency, Old World	Old World	tropical	Old World, tropical
126_131	Yes	60	60	CQ	Chloroquine	600 mg d0 + 300 mg d1	900 mg	India	Wild - Dehli, India	P14	P14_126	126	1998	Adak et al, 1998	Outpatients	28.6376	77.2235	8	Frequent relapse + long latency	Frequent relapse + long latency, Old World	Old World	tropical	Old World, tropical
126_1310	No	NA	360	CQ	Chloroquine	600 mg d0 + 300 mg d1	900 mg	India	Wild - Dehli, India	P14	P14_126	126	1998	Adak et al, 1998	Outpatients	28.6376	77.2235	8	Frequent relapse + long latency	Frequent relapse + long latency, Old World	Old World	tropical	Old World, tropical
126_1311	No	NA	360	CQ	Chloroquine	600 mg d0 + 300 mg d1	900 mg	India	Wild - Dehli, India	P14	P14_126	126	1998	Adak et al, 1998	Outpatients	28.6376	77.2235	8	Frequent relapse + long latency	Frequent relapse + long latency, Old World	Old World	tropical	Old World, tropical
126_1312	No	NA	360	CQ	Chloroquine	600 mg d0 + 300 mg d1	900 mg	India	Wild - Dehli, India	P14	P14_126	126	1998	Adak et al, 1998	Outpatients	28.6376	77.2235	8	Frequent relapse + long latency	Frequent relapse + long latency, Old World	Old World	tropical	Old World, tropical
126_1313	No	NA	360	CQ	Chloroquine	600 mg d0 + 300 mg d1	900 mg	India	Wild - Dehli, India	P14	P14_126	126	1998	Adak et al, 1998	Outpatients	28.6376	77.2235	8	Frequent relapse + long latency	Frequent relapse + long latency, Old World	Old World	tropical	Old World, tropical
126_1314	No	NA	360	CQ	Chloroquine	600 mg d0 + 300 mg d1	900 mg	India	Wild - Dehli, India	P14	P14_126	126	1998	Adak et al, 1998	Outpatients	28.6376	77.2235	8	Frequent relapse + long latency	Frequent relapse + long latency, Old World	Old World	tropical	Old World, tropical
126_1315	No	NA	360	CQ	Chloroquine	600 mg d0 + 300 mg d1	900 mg	India	Wild - Dehli, India	P14	P14_126	126	1998	Adak et al, 1998	Outpatients	28.6376	77.2235	8	Frequent relapse + long latency	Frequent relapse + long latency, Old World	Old World	tropical	Old World, tropical
126_1316	No	NA	360	CQ	Chloroquine	600 mg d0 + 300 mg d1	900 mg	India	Wild - Dehli, India	P14	P14_126	126	1998	Adak et al, 1998	Outpatients	28.6376	77.2235	8	Frequent relapse + long latency	Frequent relapse + long latency, Old World	Old World	tropical	Old World, tropical
126_1317	No	NA	360	CQ	Chloroquine	600 mg d0 + 300 mg d1	900 mg	India	Wild - Dehli, India	P14	P14_126	126	1998	Adak et al, 1998	Outpatients	28.6376	77.2235	8	Frequent relapse + long latency	Frequent relapse + long latency, Old World	Old World	tropical	Old World, tropical
126_1318	No	NA	360	CQ	Chloroquine	600 mg d0 + 300 mg d1	900 mg	India	Wild - Dehli, India	P14	P14_126	126	1998	Adak et al, 1998	Outpatients	28.6376	77.2235	8	Frequent relapse + long latency	Frequent relapse + long latency, Old World	Old World	tropical	Old World, tropical
126_1319	No	NA	360	CQ	Chloroquine	600 mg d0 + 300 mg d1	900 mg	India	Wild - Dehli, India	P14	P14_126	126	1998	Adak et al, 1998	Outpatients	28.6376	77.2235	8	Frequent relapse + long latency	Frequent relapse + long latency, Old World	Old World	tropical	Old World, tropical
126_132	Yes	60	60	CQ	Chloroquine	600 mg d0 + 300 mg d1	900 mg	India	Wild - Dehli, India	P14	P14_126	126	1998	Adak et al, 1998	Outpatients	28.6376	77.2235	8	Frequent relapse + long latency	Frequent relapse + long latency, Old World	Old World	tropical	Old World, tropical
126_1320	No	NA	360	CQ	Chloroquine	600 mg d0 + 300 mg d1	900 mg	India	Wild - Dehli, India	P14	P14_126	126	1998	Adak et al, 1998	Outpatients	28.6376	77.2235	8	Frequent relapse + long latency	Frequent relapse + long latency, Old World	Old World	tropical	Old World, tropical
126_1321	No	NA	360	CQ	Chloroquine	600 mg d0 + 300 mg d1	900 mg	India	Wild - Dehli, India	P14	P14_126	126	1998	Adak et al, 1998	Outpatients	28.6376	77.2235	8	Frequent relapse + long latency	Frequent relapse + long latency, Old World	Old World	tropical	Old World, tropical
126_1322	No	NA	360	CQ	Chloroquine	600 mg d0 + 300 mg d1	900 mg	India	Wild - Dehli, India	P14	P14_126	126	1998	Adak et al, 1998	Outpatients	28.6376	77.2235	8	Frequent relapse + long latency	Frequent relapse + long latency, Old World	Old World	tropical	Old World, tropical
126_1323	No	NA	360	CQ	Chloroquine	600 mg d0 + 300 mg d1	900 mg	India	Wild - Dehli, India	P14	P14_126	126	1998	Adak et al, 1998	Outpatients	28.6376	77.2235	8	Frequent relapse + long latency	Frequent relapse + long latency, Old World	Old World	tropical	Old World, tropical
126_1324	No	NA	360	CQ	Chloroquine	600 mg d0 + 300 mg d1	900 mg	India	Wild - Dehli, India	P14	P14_126	126	1998	Adak et al, 1998	Outpatients	28.6376	77.2235	8	Frequent relapse + long latency	Frequent relapse + long latency, Old World	Old World	tropical	Old World, tropical
126_1325	No	NA	360	CQ	Chloroquine	600 mg d0 + 300 mg d1	900 mg	India	Wild - Dehli, India	P14	P14_126	126	1998	Adak et al, 1998	Outpatients	28.6376	77.2235	8	Frequent relapse + long latency	Frequent relapse + long latency, Old World	Old World	tropical	Old World, tropical
126_1326	No	NA	360	CQ	Chloroquine	600 mg d0 + 300 mg d1	900 mg	India	Wild - Dehli, India	P14	P14_126	126	1998	Adak et al, 1998	Outpatients	28.6376	77.2235	8	Frequent relapse + long latency	Frequent relapse + long latency, Old World	Old World	tropical	Old World, tropical
126_1327	No	NA	360	CQ	Chloroquine	600 mg d0 + 300 mg d1	900 mg	India	Wild - Dehli, India	P14	P14_126	126	1998	Adak et al, 1998	Outpatients	28.6376	77.2235	8	Frequent relapse + long latency	Frequent relapse + long latency, Old World	Old World	tropical	Old World, tropical
126_1328	No	NA	360	CQ	Chloroquine	600 mg d0 + 300 mg d1	900 mg	India	Wild - Dehli, India	P14	P14_126	126	1998	Adak et al, 1998	Outpatients	28.6376	77.2235	8	Frequent relapse + long latency	Frequent relapse + long latency, Old World	Old World	tropical	Old World, tropical
126_1329	No	NA	360	CQ	Chloroquine	600 mg d0 + 300 mg d1	900 mg	India	Wild - Dehli, India	P14	P14_126	126	1998	Adak et al, 1998	Outpatients	28.6376	77.2235	8	Frequent relapse + long latency	Frequent relapse + long latency, Old World	Old World	tropical	Old World, tropical
126_133	Yes	60	60	CQ	Chloroquine	600 mg d0 + 300 mg d1	900 mg	India	Wild - Dehli, India	P14	P14_126	126	1998	Adak et al, 1998	Outpatients	28.6376	77.2235	8	Frequent relapse + long latency	Frequent relapse + long latency, Old World	Old World	tropical	Old World, tropical
126_1330	No	NA	360	CQ	Chloroquine	600 mg d0 + 300 mg d1	900 mg	India	Wild - Dehli, India	P14	P14_126	126	1998	Adak et al, 1998	Outpatients	28.6376	77.2235	8	Frequent relapse + long latency	Frequent relapse + long latency, Old World	Old World	tropical	Old World, tropical
126_1331	No	NA	360	CQ	Chloroquine	600 mg d0 + 300 mg d1	900 mg	India	Wild - Dehli, India	P14	P14_126	126	1998	Adak et al, 1998	Outpatients	28.6376	77.2235	8	Frequent relapse + long latency	Frequent relapse + long latency, Old World	Old World	tropical	Old World, tropical
126_1332	No	NA	360	CQ	Chloroquine	600 mg d0 + 300 mg d1	900 mg	India	Wild - Dehli, India	P14	P14_126	126	1998	Adak et al, 1998	Outpatients	28.6376	77.2235	8	Frequent relapse + long latency	Frequent relapse + long latency, Old World	Old World	tropical	Old World, tropical
126_1333	No	NA	360	CQ	Chloroquine	600 mg d0 + 300 mg d1	900 mg	India	Wild - Dehli, India	P14	P14_126	126	1998	Adak et al, 1998	Outpatients	28.6376	77.2235	8	Frequent relapse + long latency	Frequent relapse + long latency, Old World	Old World	tropical	Old World, tropical
126_1334	No	NA	360	CQ	Chloroquine	600 mg d0 + 300 mg d1	900 mg	India	Wild - Dehli, India	P14	P14_126	126	1998	Adak et al, 1998	Outpatients	28.6376	77.2235	8	Frequent relapse + long latency	Frequent relapse + long latency, Old World	Old World	tropical	Old World, tropical
126_1335	No	NA	360	CQ	Chloroquine	600 mg d0 + 300 mg d1	900 mg	India	Wild - Dehli, India	P14	P14_126	126	1998	Adak et al, 1998	Outpatients	28.6376	77.2235	8	Frequent relapse + long latency	Frequent relapse + long latency, Old World	Old World	tropical	Old World, tropical
126_1336	No	NA	360	CQ	Chloroquine	600 mg d0 + 300 mg d1	900 mg	India	Wild - Dehli, India	P14	P14_126	126	1998	Adak et al, 1998	Outpatients	28.6376	77.2235	8	Frequent relapse + long latency	Frequent relapse + long latency, Old World	Old World	tropical	Old World, tropical
126_1337	No	NA	360	CQ	Chloroquine	600 mg d0 + 300 mg d1	900 mg	India	Wild - Dehli, India	P14	P14_126	126	1998	Adak et al, 1998	Outpatients	28.6376	77.2235	8	Frequent relapse + long latency	Frequent relapse + long latency, Old World	Old World	tropical	Old World, tropical
126_1338	No	NA	360	CQ	Chloroquine	600 mg d0 + 300 mg d1	900 mg	India	Wild - Dehli, India	P14	P14_126	126	1998	Adak et al, 1998	Outpatients	28.6376	77.2235	8	Frequent relapse + long latency	Frequent relapse + long latency, Old World	Old World	tropical	Old World, tropical
126_1339	No	NA	360	CQ	Chloroquine	600 mg d0 + 300 mg d1	900 mg	India	Wild - Dehli, India	P14	P14_126	126	1998	Adak et al, 1998	Outpatients	28.6376	77.2235	8	Frequent relapse + long latency	Frequent relapse + long latency, Old World	Old World	tropical	Old World, tropical
126_134	Yes	60	60	CQ	Chloroquine	600 mg d0 + 300 mg d1	900 mg	India	Wild - Dehli, India	P14	P14_126	126	1998	Adak et al, 1998	Outpatients	28.6376	77.2235	8	Frequent relapse + long latency	Frequent relapse + long latency, Old World	Old World	tropical	Old World, tropical
126_1340	No	NA	360	CQ	Chloroquine	600 mg d0 + 300 mg d1	900 mg	India	Wild - Dehli, India	P14	P14_126	126	1998	Adak et al, 1998	Outpatients	28.6376	77.2235	8	Frequent relapse + long latency	Frequent relapse + long latency, Old World	Old World	tropical	Old World, tropical
126_1341	No	NA	360	CQ	Chloroquine	600 mg d0 + 300 mg d1	900 mg	India	Wild - Dehli, India	P14	P14_126	126	1998	Adak et al, 1998	Outpatients	28.6376	77.2235	8	Frequent relapse + long latency	Frequent relapse + long latency, Old World	Old World	tropical	Old World, tropical
126_1342	No	NA	360	CQ	Chloroquine	600 mg d0 + 300 mg d1	900 mg	India	Wild - Dehli, India	P14	P14_126	126	1998	Adak et al, 1998	Outpatients	28.6376	77.2235	8	Frequent relapse + long latency	Frequent relapse + long latency, Old World	Old World	tropical	Old World, tropical
126_1343	No	NA	360	CQ	Chloroquine	600 mg d0 + 300 mg d1	900 mg	India	Wild - Dehli, India	P14	P14_126	126	1998	Adak et al, 1998	Outpatients	28.6376	77.2235	8	Frequent relapse + long latency	Frequent relapse + long latency, Old World	Old World	tropical	Old World, tropical
126_1344	No	NA	360	CQ	Chloroquine	600 mg d0 + 300 mg d1	900 mg	India	Wild - Dehli, India	P14	P14_126	126	1998	Adak et al, 1998	Outpatients	28.6376	77.2235	8	Frequent relapse + long latency	Frequent relapse + long latency, Old World	Old World	tropical	Old World, tropical
126_1345	No	NA	360	CQ	Chloroquine	600 mg d0 + 300 mg d1	900 mg	India	Wild - Dehli, India	P14	P14_126	126	1998	Adak et al, 1998	Outpatients	28.6376	77.2235	8	Frequent relapse + long latency	Frequent relapse + long latency, Old World	Old World	tropical	Old World, tropical
126_1346	No	NA	360	CQ	Chloroquine	600 mg d0 + 300 mg d1	900 mg	India	Wild - Dehli, India	P14	P14_126	126	1998	Adak et al, 1998	Outpatients	28.6376	77.2235	8	Frequent relapse + long latency	Frequent relapse + long latency, Old World	Old World	tropical	Old World, tropical
126_1347	No	NA	360	CQ	Chloroquine	600 mg d0 + 300 mg d1	900 mg	India	Wild - Dehli, India	P14	P14_126	126	1998	Adak et al, 1998	Outpatients	28.6376	77.2235	8	Frequent relapse + long latency	Frequent relapse + long latency, Old World	Old World	tropical	Old World, tropical
126_1348	No	NA	360	CQ	Chloroquine	600 mg d0 + 300 mg d1	900 mg	India	Wild - Dehli, India	P14	P14_126	126	1998	Adak et al, 1998	Outpatients	28.6376	77.2235	8	Frequent relapse + long latency	Frequent relapse + long latency, Old World	Old World	tropical	Old World, tropical
126_1349	No	NA	360	CQ	Chloroquine	600 mg d0 + 300 mg d1	900 mg	India	Wild - Dehli, India	P14	P14_126	126	1998	Adak et al, 1998	Outpatients	28.6376	77.2235	8	Frequent relapse + long latency	Frequent relapse + long latency, Old World	Old World	tropical	Old World, tropical
126_135	Yes	60	60	CQ	Chloroquine	600 mg d0 + 300 mg d1	900 mg	India	Wild - Dehli, India	P14	P14_126	126	1998	Adak et al, 1998	Outpatients	28.6376	77.2235	8	Frequent relapse + long latency	Frequent relapse + long latency, Old World	Old World	tropical	Old World, tropical
126_1350	No	NA	360	CQ	Chloroquine	600 mg d0 + 300 mg d1	900 mg	India	Wild - Dehli, India	P14	P14_126	126	1998	Adak et al, 1998	Outpatients	28.6376	77.2235	8	Frequent relapse + long latency	Frequent relapse + long latency, Old World	Old World	tropical	Old World, tropical
126_1351	No	NA	360	CQ	Chloroquine	600 mg d0 + 300 mg d1	900 mg	India	Wild - Dehli, India	P14	P14_126	126	1998	Adak et al, 1998	Outpatients	28.6376	77.2235	8	Frequent relapse + long latency	Frequent relapse + long latency, Old World	Old World	tropical	Old World, tropical
126_1352	No	NA	360	CQ	Chloroquine	600 mg d0 + 300 mg d1	900 mg	India	Wild - Dehli, India	P14	P14_126	126	1998	Adak et al, 1998	Outpatients	28.6376	77.2235	8	Frequent relapse + long latency	Frequent relapse + long latency, Old World	Old World	tropical	Old World, tropical
126_1353	No	NA	360	CQ	Chloroquine	600 mg d0 + 300 mg d1	900 mg	India	Wild - Dehli, India	P14	P14_126	126	1998	Adak et al, 1998	Outpatients	28.6376	77.2235	8	Frequent relapse + long latency	Frequent relapse + long latency, Old World	Old World	tropical	Old World, tropical
126_1354	No	NA	360	CQ	Chloroquine	600 mg d0 + 300 mg d1	900 mg	India	Wild - Dehli, India	P14	P14_126	126	1998	Adak et al, 1998	Outpatients	28.6376	77.2235	8	Frequent relapse + long latency	Frequent relapse + long latency, Old World	Old World	tropical	Old World, tropical
126_1355	No	NA	360	CQ	Chloroquine	600 mg d0 + 300 mg d1	900 mg	India	Wild - Dehli, India	P14	P14_126	126	1998	Adak et al, 1998	Outpatients	28.6376	77.2235	8	Frequent relapse + long latency	Frequent relapse + long latency, Old World	Old World	tropical	Old World, tropical
126_1356	No	NA	360	CQ	Chloroquine	600 mg d0 + 300 mg d1	900 mg	India	Wild - Dehli, India	P14	P14_126	126	1998	Adak et al, 1998	Outpatients	28.6376	77.2235	8	Frequent relapse + long latency	Frequent relapse + long latency, Old World	Old World	tropical	Old World, tropical
126_1357	No	NA	360	CQ	Chloroquine	600 mg d0 + 300 mg d1	900 mg	India	Wild - Dehli, India	P14	P14_126	126	1998	Adak et al, 1998	Outpatients	28.6376	77.2235	8	Frequent relapse + long latency	Frequent relapse + long latency, Old World	Old World	tropical	Old World, tropical
126_1358	No	NA	360	CQ	Chloroquine	600 mg d0 + 300 mg d1	900 mg	India	Wild - Dehli, India	P14	P14_126	126	1998	Adak et al, 1998	Outpatients	28.6376	77.2235	8	Frequent relapse + long latency	Frequent relapse + long latency, Old World	Old World	tropical	Old World, tropical
126_1359	No	NA	360	CQ	Chloroquine	600 mg d0 + 300 mg d1	900 mg	India	Wild - Dehli, India	P14	P14_126	126	1998	Adak et al, 1998	Outpatients	28.6376	77.2235	8	Frequent relapse + long latency	Frequent relapse + long latency, Old World	Old World	tropical	Old World, tropical
126_136	Yes	60	60	CQ	Chloroquine	600 mg d0 + 300 mg d1	900 mg	India	Wild - Dehli, India	P14	P14_126	126	1998	Adak et al, 1998	Outpatients	28.6376	77.2235	8	Frequent relapse + long latency	Frequent relapse + long latency, Old World	Old World	tropical	Old World, tropical
126_1360	No	NA	360	CQ	Chloroquine	600 mg d0 + 300 mg d1	900 mg	India	Wild - Dehli, India	P14	P14_126	126	1998	Adak et al, 1998	Outpatients	28.6376	77.2235	8	Frequent relapse + long latency	Frequent relapse + long latency, Old World	Old World	tropical	Old World, tropical
126_1361	No	NA	360	CQ	Chloroquine	600 mg d0 + 300 mg d1	900 mg	India	Wild - Dehli, India	P14	P14_126	126	1998	Adak et al, 1998	Outpatients	28.6376	77.2235	8	Frequent relapse + long latency	Frequent relapse + long latency, Old World	Old World	tropical	Old World, tropical
126_1362	No	NA	360	CQ	Chloroquine	600 mg d0 + 300 mg d1	900 mg	India	Wild - Dehli, India	P14	P14_126	126	1998	Adak et al, 1998	Outpatients	28.6376	77.2235	8	Frequent relapse + long latency	Frequent relapse + long latency, Old World	Old World	tropical	Old World, tropical
126_1363	No	NA	360	CQ	Chloroquine	600 mg d0 + 300 mg d1	900 mg	India	Wild - Dehli, India	P14	P14_126	126	1998	Adak et al, 1998	Outpatients	28.6376	77.2235	8	Frequent relapse + long latency	Frequent relapse + long latency, Old World	Old World	tropical	Old World, tropical
126_1364	No	NA	360	CQ	Chloroquine	600 mg d0 + 300 mg d1	900 mg	India	Wild - Dehli, India	P14	P14_126	126	1998	Adak et al, 1998	Outpatients	28.6376	77.2235	8	Frequent relapse + long latency	Frequent relapse + long latency, Old World	Old World	tropical	Old World, tropical
126_1365	No	NA	360	CQ	Chloroquine	600 mg d0 + 300 mg d1	900 mg	India	Wild - Dehli, India	P14	P14_126	126	1998	Adak et al, 1998	Outpatients	28.6376	77.2235	8	Frequent relapse + long latency	Frequent relapse + long latency, Old World	Old World	tropical	Old World, tropical
126_1366	No	NA	360	CQ	Chloroquine	600 mg d0 + 300 mg d1	900 mg	India	Wild - Dehli, India	P14	P14_126	126	1998	Adak et al, 1998	Outpatients	28.6376	77.2235	8	Frequent relapse + long latency	Frequent relapse + long latency, Old World	Old World	tropical	Old World, tropical
126_1367	No	NA	360	CQ	Chloroquine	600 mg d0 + 300 mg d1	900 mg	India	Wild - Dehli, India	P14	P14_126	126	1998	Adak et al, 1998	Outpatients	28.6376	77.2235	8	Frequent relapse + long latency	Frequent relapse + long latency, Old World	Old World	tropical	Old World, tropical
126_1368	No	NA	360	CQ	Chloroquine	600 mg d0 + 300 mg d1	900 mg	India	Wild - Dehli, India	P14	P14_126	126	1998	Adak et al, 1998	Outpatients	28.6376	77.2235	8	Frequent relapse + long latency	Frequent relapse + long latency, Old World	Old World	tropical	Old World, tropical
126_1369	No	NA	360	CQ	Chloroquine	600 mg d0 + 300 mg d1	900 mg	India	Wild - Dehli, India	P14	P14_126	126	1998	Adak et al, 1998	Outpatients	28.6376	77.2235	8	Frequent relapse + long latency	Frequent relapse + long latency, Old World	Old World	tropical	Old World, tropical
126_137	Yes	60	60	CQ	Chloroquine	600 mg d0 + 300 mg d1	900 mg	India	Wild - Dehli, India	P14	P14_126	126	1998	Adak et al, 1998	Outpatients	28.6376	77.2235	8	Frequent relapse + long latency	Frequent relapse + long latency, Old World	Old World	tropical	Old World, tropical
126_1370	No	NA	360	CQ	Chloroquine	600 mg d0 + 300 mg d1	900 mg	India	Wild - Dehli, India	P14	P14_126	126	1998	Adak et al, 1998	Outpatients	28.6376	77.2235	8	Frequent relapse + long latency	Frequent relapse + long latency, Old World	Old World	tropical	Old World, tropical
126_1371	No	NA	360	CQ	Chloroquine	600 mg d0 + 300 mg d1	900 mg	India	Wild - Dehli, India	P14	P14_126	126	1998	Adak et al, 1998	Outpatients	28.6376	77.2235	8	Frequent relapse + long latency	Frequent relapse + long latency, Old World	Old World	tropical	Old World, tropical
126_1372	No	NA	360	CQ	Chloroquine	600 mg d0 + 300 mg d1	900 mg	India	Wild - Dehli, India	P14	P14_126	126	1998	Adak et al, 1998	Outpatients	28.6376	77.2235	8	Frequent relapse + long latency	Frequent relapse + long latency, Old World	Old World	tropical	Old World, tropical
126_1373	No	NA	360	CQ	Chloroquine	600 mg d0 + 300 mg d1	900 mg	India	Wild - Dehli, India	P14	P14_126	126	1998	Adak et al, 1998	Outpatients	28.6376	77.2235	8	Frequent relapse + long latency	Frequent relapse + long latency, Old World	Old World	tropical	Old World, tropical
126_1374	No	NA	360	CQ	Chloroquine	600 mg d0 + 300 mg d1	900 mg	India	Wild - Dehli, India	P14	P14_126	126	1998	Adak et al, 1998	Outpatients	28.6376	77.2235	8	Frequent relapse + long latency	Frequent relapse + long latency, Old World	Old World	tropical	Old World, tropical
126_1375	No	NA	360	CQ	Chloroquine	600 mg d0 + 300 mg d1	900 mg	India	Wild - Dehli, India	P14	P14_126	126	1998	Adak et al, 1998	Outpatients	28.6376	77.2235	8	Frequent relapse + long latency	Frequent relapse + long latency, Old World	Old World	tropical	Old World, tropical
126_1376	No	NA	360	CQ	Chloroquine	600 mg d0 + 300 mg d1	900 mg	India	Wild - Dehli, India	P14	P14_126	126	1998	Adak et al, 1998	Outpatients	28.6376	77.2235	8	Frequent relapse + long latency	Frequent relapse + long latency, Old World	Old World	tropical	Old World, tropical
126_1377	No	NA	360	CQ	Chloroquine	600 mg d0 + 300 mg d1	900 mg	India	Wild - Dehli, India	P14	P14_126	126	1998	Adak et al, 1998	Outpatients	28.6376	77.2235	8	Frequent relapse + long latency	Frequent relapse + long latency, Old World	Old World	tropical	Old World, tropical
126_1378	No	NA	360	CQ	Chloroquine	600 mg d0 + 300 mg d1	900 mg	India	Wild - Dehli, India	P14	P14_126	126	1998	Adak et al, 1998	Outpatients	28.6376	77.2235	8	Frequent relapse + long latency	Frequent relapse + long latency, Old World	Old World	tropical	Old World, tropical
126_1379	No	NA	360	CQ	Chloroquine	600 mg d0 + 300 mg d1	900 mg	India	Wild - Dehli, India	P14	P14_126	126	1998	Adak et al, 1998	Outpatients	28.6376	77.2235	8	Frequent relapse + long latency	Frequent relapse + long latency, Old World	Old World	tropical	Old World, tropical
126_138	Yes	60	60	CQ	Chloroquine	600 mg d0 + 300 mg d1	900 mg	India	Wild - Dehli, India	P14	P14_126	126	1998	Adak et al, 1998	Outpatients	28.6376	77.2235	8	Frequent relapse + long latency	Frequent relapse + long latency, Old World	Old World	tropical	Old World, tropical
126_1380	No	NA	360	CQ	Chloroquine	600 mg d0 + 300 mg d1	900 mg	India	Wild - Dehli, India	P14	P14_126	126	1998	Adak et al, 1998	Outpatients	28.6376	77.2235	8	Frequent relapse + long latency	Frequent relapse + long latency, Old World	Old World	tropical	Old World, tropical
126_1381	No	NA	360	CQ	Chloroquine	600 mg d0 + 300 mg d1	900 mg	India	Wild - Dehli, India	P14	P14_126	126	1998	Adak et al, 1998	Outpatients	28.6376	77.2235	8	Frequent relapse + long latency	Frequent relapse + long latency, Old World	Old World	tropical	Old World, tropical
126_1382	No	NA	360	CQ	Chloroquine	600 mg d0 + 300 mg d1	900 mg	India	Wild - Dehli, India	P14	P14_126	126	1998	Adak et al, 1998	Outpatients	28.6376	77.2235	8	Frequent relapse + long latency	Frequent relapse + long latency, Old World	Old World	tropical	Old World, tropical
126_1383	No	NA	360	CQ	Chloroquine	600 mg d0 + 300 mg d1	900 mg	India	Wild - Dehli, India	P14	P14_126	126	1998	Adak et al, 1998	Outpatients	28.6376	77.2235	8	Frequent relapse + long latency	Frequent relapse + long latency, Old World	Old World	tropical	Old World, tropical
126_1384	No	NA	360	CQ	Chloroquine	600 mg d0 + 300 mg d1	900 mg	India	Wild - Dehli, India	P14	P14_126	126	1998	Adak et al, 1998	Outpatients	28.6376	77.2235	8	Frequent relapse + long latency	Frequent relapse + long latency, Old World	Old World	tropical	Old World, tropical
126_1385	No	NA	360	CQ	Chloroquine	600 mg d0 + 300 mg d1	900 mg	India	Wild - Dehli, India	P14	P14_126	126	1998	Adak et al, 1998	Outpatients	28.6376	77.2235	8	Frequent relapse + long latency	Frequent relapse + long latency, Old World	Old World	tropical	Old World, tropical
126_1386	No	NA	360	CQ	Chloroquine	600 mg d0 + 300 mg d1	900 mg	India	Wild - Dehli, India	P14	P14_126	126	1998	Adak et al, 1998	Outpatients	28.6376	77.2235	8	Frequent relapse + long latency	Frequent relapse + long latency, Old World	Old World	tropical	Old World, tropical
126_1387	No	NA	360	CQ	Chloroquine	600 mg d0 + 300 mg d1	900 mg	India	Wild - Dehli, India	P14	P14_126	126	1998	Adak et al, 1998	Outpatients	28.6376	77.2235	8	Frequent relapse + long latency	Frequent relapse + long latency, Old World	Old World	tropical	Old World, tropical
126_1388	No	NA	360	CQ	Chloroquine	600 mg d0 + 300 mg d1	900 mg	India	Wild - Dehli, India	P14	P14_126	126	1998	Adak et al, 1998	Outpatients	28.6376	77.2235	8	Frequent relapse + long latency	Frequent relapse + long latency, Old World	Old World	tropical	Old World, tropical
126_1389	No	NA	360	CQ	Chloroquine	600 mg d0 + 300 mg d1	900 mg	India	Wild - Dehli, India	P14	P14_126	126	1998	Adak et al, 1998	Outpatients	28.6376	77.2235	8	Frequent relapse + long latency	Frequent relapse + long latency, Old World	Old World	tropical	Old World, tropical
126_139	Yes	60	60	CQ	Chloroquine	600 mg d0 + 300 mg d1	900 mg	India	Wild - Dehli, India	P14	P14_126	126	1998	Adak et al, 1998	Outpatients	28.6376	77.2235	8	Frequent relapse + long latency	Frequent relapse + long latency, Old World	Old World	tropical	Old World, tropical
126_1390	No	NA	360	CQ	Chloroquine	600 mg d0 + 300 mg d1	900 mg	India	Wild - Dehli, India	P14	P14_126	126	1998	Adak et al, 1998	Outpatients	28.6376	77.2235	8	Frequent relapse + long latency	Frequent relapse + long latency, Old World	Old World	tropical	Old World, tropical
126_1391	No	NA	360	CQ	Chloroquine	600 mg d0 + 300 mg d1	900 mg	India	Wild - Dehli, India	P14	P14_126	126	1998	Adak et al, 1998	Outpatients	28.6376	77.2235	8	Frequent relapse + long latency	Frequent relapse + long latency, Old World	Old World	tropical	Old World, tropical
126_1392	No	NA	360	CQ	Chloroquine	600 mg d0 + 300 mg d1	900 mg	India	Wild - Dehli, India	P14	P14_126	126	1998	Adak et al, 1998	Outpatients	28.6376	77.2235	8	Frequent relapse + long latency	Frequent relapse + long latency, Old World	Old World	tropical	Old World, tropical
126_1393	No	NA	360	CQ	Chloroquine	600 mg d0 + 300 mg d1	900 mg	India	Wild - Dehli, India	P14	P14_126	126	1998	Adak et al, 1998	Outpatients	28.6376	77.2235	8	Frequent relapse + long latency	Frequent relapse + long latency, Old World	Old World	tropical	Old World, tropical
126_1394	No	NA	360	CQ	Chloroquine	600 mg d0 + 300 mg d1	900 mg	India	Wild - Dehli, India	P14	P14_126	126	1998	Adak et al, 1998	Outpatients	28.6376	77.2235	8	Frequent relapse + long latency	Frequent relapse + long latency, Old World	Old World	tropical	Old World, tropical
126_1395	No	NA	360	CQ	Chloroquine	600 mg d0 + 300 mg d1	900 mg	India	Wild - Dehli, India	P14	P14_126	126	1998	Adak et al, 1998	Outpatients	28.6376	77.2235	8	Frequent relapse + long latency	Frequent relapse + long latency, Old World	Old World	tropical	Old World, tropical
126_1396	No	NA	360	CQ	Chloroquine	600 mg d0 + 300 mg d1	900 mg	India	Wild - Dehli, India	P14	P14_126	126	1998	Adak et al, 1998	Outpatients	28.6376	77.2235	8	Frequent relapse + long latency	Frequent relapse + long latency, Old World	Old World	tropical	Old World, tropical
126_1397	No	NA	360	CQ	Chloroquine	600 mg d0 + 300 mg d1	900 mg	India	Wild - Dehli, India	P14	P14_126	126	1998	Adak et al, 1998	Outpatients	28.6376	77.2235	8	Frequent relapse + long latency	Frequent relapse + long latency, Old World	Old World	tropical	Old World, tropical
126_1398	No	NA	360	CQ	Chloroquine	600 mg d0 + 300 mg d1	900 mg	India	Wild - Dehli, India	P14	P14_126	126	1998	Adak et al, 1998	Outpatients	28.6376	77.2235	8	Frequent relapse + long latency	Frequent relapse + long latency, Old World	Old World	tropical	Old World, tropical
126_1399	No	NA	360	CQ	Chloroquine	600 mg d0 + 300 mg d1	900 mg	India	Wild - Dehli, India	P14	P14_126	126	1998	Adak et al, 1998	Outpatients	28.6376	77.2235	8	Frequent relapse + long latency	Frequent relapse + long latency, Old World	Old World	tropical	Old World, tropical
126_14	Yes	30	30	CQ	Chloroquine	600 mg d0 + 300 mg d1	900 mg	India	Wild - Dehli, India	P14	P14_126	126	1998	Adak et al, 1998	Outpatients	28.6376	77.2235	8	Frequent relapse + long latency	Frequent relapse + long latency, Old World	Old World	tropical	Old World, tropical
126_140	Yes	60	60	CQ	Chloroquine	600 mg d0 + 300 mg d1	900 mg	India	Wild - Dehli, India	P14	P14_126	126	1998	Adak et al, 1998	Outpatients	28.6376	77.2235	8	Frequent relapse + long latency	Frequent relapse + long latency, Old World	Old World	tropical	Old World, tropical
126_1400	No	NA	360	CQ	Chloroquine	600 mg d0 + 300 mg d1	900 mg	India	Wild - Dehli, India	P14	P14_126	126	1998	Adak et al, 1998	Outpatients	28.6376	77.2235	8	Frequent relapse + long latency	Frequent relapse + long latency, Old World	Old World	tropical	Old World, tropical
126_1401	No	NA	360	CQ	Chloroquine	600 mg d0 + 300 mg d1	900 mg	India	Wild - Dehli, India	P14	P14_126	126	1998	Adak et al, 1998	Outpatients	28.6376	77.2235	8	Frequent relapse + long latency	Frequent relapse + long latency, Old World	Old World	tropical	Old World, tropical
126_1402	No	NA	360	CQ	Chloroquine	600 mg d0 + 300 mg d1	900 mg	India	Wild - Dehli, India	P14	P14_126	126	1998	Adak et al, 1998	Outpatients	28.6376	77.2235	8	Frequent relapse + long latency	Frequent relapse + long latency, Old World	Old World	tropical	Old World, tropical
126_1403	No	NA	360	CQ	Chloroquine	600 mg d0 + 300 mg d1	900 mg	India	Wild - Dehli, India	P14	P14_126	126	1998	Adak et al, 1998	Outpatients	28.6376	77.2235	8	Frequent relapse + long latency	Frequent relapse + long latency, Old World	Old World	tropical	Old World, tropical
126_1404	No	NA	360	CQ	Chloroquine	600 mg d0 + 300 mg d1	900 mg	India	Wild - Dehli, India	P14	P14_126	126	1998	Adak et al, 1998	Outpatients	28.6376	77.2235	8	Frequent relapse + long latency	Frequent relapse + long latency, Old World	Old World	tropical	Old World, tropical
126_1405	No	NA	360	CQ	Chloroquine	600 mg d0 + 300 mg d1	900 mg	India	Wild - Dehli, India	P14	P14_126	126	1998	Adak et al, 1998	Outpatients	28.6376	77.2235	8	Frequent relapse + long latency	Frequent relapse + long latency, Old World	Old World	tropical	Old World, tropical
126_1406	No	NA	360	CQ	Chloroquine	600 mg d0 + 300 mg d1	900 mg	India	Wild - Dehli, India	P14	P14_126	126	1998	Adak et al, 1998	Outpatients	28.6376	77.2235	8	Frequent relapse + long latency	Frequent relapse + long latency, Old World	Old World	tropical	Old World, tropical
126_1407	No	NA	360	CQ	Chloroquine	600 mg d0 + 300 mg d1	900 mg	India	Wild - Dehli, India	P14	P14_126	126	1998	Adak et al, 1998	Outpatients	28.6376	77.2235	8	Frequent relapse + long latency	Frequent relapse + long latency, Old World	Old World	tropical	Old World, tropical
126_1408	No	NA	360	CQ	Chloroquine	600 mg d0 + 300 mg d1	900 mg	India	Wild - Dehli, India	P14	P14_126	126	1998	Adak et al, 1998	Outpatients	28.6376	77.2235	8	Frequent relapse + long latency	Frequent relapse + long latency, Old World	Old World	tropical	Old World, tropical
126_1409	No	NA	360	CQ	Chloroquine	600 mg d0 + 300 mg d1	900 mg	India	Wild - Dehli, India	P14	P14_126	126	1998	Adak et al, 1998	Outpatients	28.6376	77.2235	8	Frequent relapse + long latency	Frequent relapse + long latency, Old World	Old World	tropical	Old World, tropical
126_141	Yes	60	60	CQ	Chloroquine	600 mg d0 + 300 mg d1	900 mg	India	Wild - Dehli, India	P14	P14_126	126	1998	Adak et al, 1998	Outpatients	28.6376	77.2235	8	Frequent relapse + long latency	Frequent relapse + long latency, Old World	Old World	tropical	Old World, tropical
126_1410	No	NA	360	CQ	Chloroquine	600 mg d0 + 300 mg d1	900 mg	India	Wild - Dehli, India	P14	P14_126	126	1998	Adak et al, 1998	Outpatients	28.6376	77.2235	8	Frequent relapse + long latency	Frequent relapse + long latency, Old World	Old World	tropical	Old World, tropical
126_1411	No	NA	360	CQ	Chloroquine	600 mg d0 + 300 mg d1	900 mg	India	Wild - Dehli, India	P14	P14_126	126	1998	Adak et al, 1998	Outpatients	28.6376	77.2235	8	Frequent relapse + long latency	Frequent relapse + long latency, Old World	Old World	tropical	Old World, tropical
126_1412	No	NA	360	CQ	Chloroquine	600 mg d0 + 300 mg d1	900 mg	India	Wild - Dehli, India	P14	P14_126	126	1998	Adak et al, 1998	Outpatients	28.6376	77.2235	8	Frequent relapse + long latency	Frequent relapse + long latency, Old World	Old World	tropical	Old World, tropical
126_1413	No	NA	360	CQ	Chloroquine	600 mg d0 + 300 mg d1	900 mg	India	Wild - Dehli, India	P14	P14_126	126	1998	Adak et al, 1998	Outpatients	28.6376	77.2235	8	Frequent relapse + long latency	Frequent relapse + long latency, Old World	Old World	tropical	Old World, tropical
126_1414	No	NA	360	CQ	Chloroquine	600 mg d0 + 300 mg d1	900 mg	India	Wild - Dehli, India	P14	P14_126	126	1998	Adak et al, 1998	Outpatients	28.6376	77.2235	8	Frequent relapse + long latency	Frequent relapse + long latency, Old World	Old World	tropical	Old World, tropical
126_1415	No	NA	360	CQ	Chloroquine	600 mg d0 + 300 mg d1	900 mg	India	Wild - Dehli, India	P14	P14_126	126	1998	Adak et al, 1998	Outpatients	28.6376	77.2235	8	Frequent relapse + long latency	Frequent relapse + long latency, Old World	Old World	tropical	Old World, tropical
126_1416	No	NA	360	CQ	Chloroquine	600 mg d0 + 300 mg d1	900 mg	India	Wild - Dehli, India	P14	P14_126	126	1998	Adak et al, 1998	Outpatients	28.6376	77.2235	8	Frequent relapse + long latency	Frequent relapse + long latency, Old World	Old World	tropical	Old World, tropical
126_1417	No	NA	360	CQ	Chloroquine	600 mg d0 + 300 mg d1	900 mg	India	Wild - Dehli, India	P14	P14_126	126	1998	Adak et al, 1998	Outpatients	28.6376	77.2235	8	Frequent relapse + long latency	Frequent relapse + long latency, Old World	Old World	tropical	Old World, tropical
126_1418	No	NA	360	CQ	Chloroquine	600 mg d0 + 300 mg d1	900 mg	India	Wild - Dehli, India	P14	P14_126	126	1998	Adak et al, 1998	Outpatients	28.6376	77.2235	8	Frequent relapse + long latency	Frequent relapse + long latency, Old World	Old World	tropical	Old World, tropical
126_1419	No	NA	360	CQ	Chloroquine	600 mg d0 + 300 mg d1	900 mg	India	Wild - Dehli, India	P14	P14_126	126	1998	Adak et al, 1998	Outpatients	28.6376	77.2235	8	Frequent relapse + long latency	Frequent relapse + long latency, Old World	Old World	tropical	Old World, tropical
126_142	Yes	60	60	CQ	Chloroquine	600 mg d0 + 300 mg d1	900 mg	India	Wild - Dehli, India	P14	P14_126	126	1998	Adak et al, 1998	Outpatients	28.6376	77.2235	8	Frequent relapse + long latency	Frequent relapse + long latency, Old World	Old World	tropical	Old World, tropical
126_1420	No	NA	360	CQ	Chloroquine	600 mg d0 + 300 mg d1	900 mg	India	Wild - Dehli, India	P14	P14_126	126	1998	Adak et al, 1998	Outpatients	28.6376	77.2235	8	Frequent relapse + long latency	Frequent relapse + long latency, Old World	Old World	tropical	Old World, tropical
126_1421	No	NA	360	CQ	Chloroquine	600 mg d0 + 300 mg d1	900 mg	India	Wild - Dehli, India	P14	P14_126	126	1998	Adak et al, 1998	Outpatients	28.6376	77.2235	8	Frequent relapse + long latency	Frequent relapse + long latency, Old World	Old World	tropical	Old World, tropical
126_1422	No	NA	360	CQ	Chloroquine	600 mg d0 + 300 mg d1	900 mg	India	Wild - Dehli, India	P14	P14_126	126	1998	Adak et al, 1998	Outpatients	28.6376	77.2235	8	Frequent relapse + long latency	Frequent relapse + long latency, Old World	Old World	tropical	Old World, tropical
126_1423	No	NA	360	CQ	Chloroquine	600 mg d0 + 300 mg d1	900 mg	India	Wild - Dehli, India	P14	P14_126	126	1998	Adak et al, 1998	Outpatients	28.6376	77.2235	8	Frequent relapse + long latency	Frequent relapse + long latency, Old World	Old World	tropical	Old World, tropical
126_1424	No	NA	360	CQ	Chloroquine	600 mg d0 + 300 mg d1	900 mg	India	Wild - Dehli, India	P14	P14_126	126	1998	Adak et al, 1998	Outpatients	28.6376	77.2235	8	Frequent relapse + long latency	Frequent relapse + long latency, Old World	Old World	tropical	Old World, tropical
126_1425	No	NA	360	CQ	Chloroquine	600 mg d0 + 300 mg d1	900 mg	India	Wild - Dehli, India	P14	P14_126	126	1998	Adak et al, 1998	Outpatients	28.6376	77.2235	8	Frequent relapse + long latency	Frequent relapse + long latency, Old World	Old World	tropical	Old World, tropical
126_1426	No	NA	360	CQ	Chloroquine	600 mg d0 + 300 mg d1	900 mg	India	Wild - Dehli, India	P14	P14_126	126	1998	Adak et al, 1998	Outpatients	28.6376	77.2235	8	Frequent relapse + long latency	Frequent relapse + long latency, Old World	Old World	tropical	Old World, tropical
126_1427	No	NA	360	CQ	Chloroquine	600 mg d0 + 300 mg d1	900 mg	India	Wild - Dehli, India	P14	P14_126	126	1998	Adak et al, 1998	Outpatients	28.6376	77.2235	8	Frequent relapse + long latency	Frequent relapse + long latency, Old World	Old World	tropical	Old World, tropical
126_1428	No	NA	360	CQ	Chloroquine	600 mg d0 + 300 mg d1	900 mg	India	Wild - Dehli, India	P14	P14_126	126	1998	Adak et al, 1998	Outpatients	28.6376	77.2235	8	Frequent relapse + long latency	Frequent relapse + long latency, Old World	Old World	tropical	Old World, tropical
126_1429	No	NA	360	CQ	Chloroquine	600 mg d0 + 300 mg d1	900 mg	India	Wild - Dehli, India	P14	P14_126	126	1998	Adak et al, 1998	Outpatients	28.6376	77.2235	8	Frequent relapse + long latency	Frequent relapse + long latency, Old World	Old World	tropical	Old World, tropical
126_143	Yes	60	60	CQ	Chloroquine	600 mg d0 + 300 mg d1	900 mg	India	Wild - Dehli, India	P14	P14_126	126	1998	Adak et al, 1998	Outpatients	28.6376	77.2235	8	Frequent relapse + long latency	Frequent relapse + long latency, Old World	Old World	tropical	Old World, tropical
126_1430	No	NA	360	CQ	Chloroquine	600 mg d0 + 300 mg d1	900 mg	India	Wild - Dehli, India	P14	P14_126	126	1998	Adak et al, 1998	Outpatients	28.6376	77.2235	8	Frequent relapse + long latency	Frequent relapse + long latency, Old World	Old World	tropical	Old World, tropical
126_1431	No	NA	360	CQ	Chloroquine	600 mg d0 + 300 mg d1	900 mg	India	Wild - Dehli, India	P14	P14_126	126	1998	Adak et al, 1998	Outpatients	28.6376	77.2235	8	Frequent relapse + long latency	Frequent relapse + long latency, Old World	Old World	tropical	Old World, tropical
126_1432	No	NA	360	CQ	Chloroquine	600 mg d0 + 300 mg d1	900 mg	India	Wild - Dehli, India	P14	P14_126	126	1998	Adak et al, 1998	Outpatients	28.6376	77.2235	8	Frequent relapse + long latency	Frequent relapse + long latency, Old World	Old World	tropical	Old World, tropical
126_1433	No	NA	360	CQ	Chloroquine	600 mg d0 + 300 mg d1	900 mg	India	Wild - Dehli, India	P14	P14_126	126	1998	Adak et al, 1998	Outpatients	28.6376	77.2235	8	Frequent relapse + long latency	Frequent relapse + long latency, Old World	Old World	tropical	Old World, tropical
126_1434	No	NA	360	CQ	Chloroquine	600 mg d0 + 300 mg d1	900 mg	India	Wild - Dehli, India	P14	P14_126	126	1998	Adak et al, 1998	Outpatients	28.6376	77.2235	8	Frequent relapse + long latency	Frequent relapse + long latency, Old World	Old World	tropical	Old World, tropical
126_1435	No	NA	360	CQ	Chloroquine	600 mg d0 + 300 mg d1	900 mg	India	Wild - Dehli, India	P14	P14_126	126	1998	Adak et al, 1998	Outpatients	28.6376	77.2235	8	Frequent relapse + long latency	Frequent relapse + long latency, Old World	Old World	tropical	Old World, tropical
126_1436	No	NA	360	CQ	Chloroquine	600 mg d0 + 300 mg d1	900 mg	India	Wild - Dehli, India	P14	P14_126	126	1998	Adak et al, 1998	Outpatients	28.6376	77.2235	8	Frequent relapse + long latency	Frequent relapse + long latency, Old World	Old World	tropical	Old World, tropical
126_1437	No	NA	360	CQ	Chloroquine	600 mg d0 + 300 mg d1	900 mg	India	Wild - Dehli, India	P14	P14_126	126	1998	Adak et al, 1998	Outpatients	28.6376	77.2235	8	Frequent relapse + long latency	Frequent relapse + long latency, Old World	Old World	tropical	Old World, tropical
126_1438	No	NA	360	CQ	Chloroquine	600 mg d0 + 300 mg d1	900 mg	India	Wild - Dehli, India	P14	P14_126	126	1998	Adak et al, 1998	Outpatients	28.6376	77.2235	8	Frequent relapse + long latency	Frequent relapse + long latency, Old World	Old World	tropical	Old World, tropical
126_1439	No	NA	360	CQ	Chloroquine	600 mg d0 + 300 mg d1	900 mg	India	Wild - Dehli, India	P14	P14_126	126	1998	Adak et al, 1998	Outpatients	28.6376	77.2235	8	Frequent relapse + long latency	Frequent relapse + long latency, Old World	Old World	tropical	Old World, tropical
126_144	Yes	60	60	CQ	Chloroquine	600 mg d0 + 300 mg d1	900 mg	India	Wild - Dehli, India	P14	P14_126	126	1998	Adak et al, 1998	Outpatients	28.6376	77.2235	8	Frequent relapse + long latency	Frequent relapse + long latency, Old World	Old World	tropical	Old World, tropical
126_1440	No	NA	360	CQ	Chloroquine	600 mg d0 + 300 mg d1	900 mg	India	Wild - Dehli, India	P14	P14_126	126	1998	Adak et al, 1998	Outpatients	28.6376	77.2235	8	Frequent relapse + long latency	Frequent relapse + long latency, Old World	Old World	tropical	Old World, tropical
126_1441	No	NA	360	CQ	Chloroquine	600 mg d0 + 300 mg d1	900 mg	India	Wild - Dehli, India	P14	P14_126	126	1998	Adak et al, 1998	Outpatients	28.6376	77.2235	8	Frequent relapse + long latency	Frequent relapse + long latency, Old World	Old World	tropical	Old World, tropical
126_1442	No	NA	360	CQ	Chloroquine	600 mg d0 + 300 mg d1	900 mg	India	Wild - Dehli, India	P14	P14_126	126	1998	Adak et al, 1998	Outpatients	28.6376	77.2235	8	Frequent relapse + long latency	Frequent relapse + long latency, Old World	Old World	tropical	Old World, tropical
126_1443	No	NA	360	CQ	Chloroquine	600 mg d0 + 300 mg d1	900 mg	India	Wild - Dehli, India	P14	P14_126	126	1998	Adak et al, 1998	Outpatients	28.6376	77.2235	8	Frequent relapse + long latency	Frequent relapse + long latency, Old World	Old World	tropical	Old World, tropical
126_1444	No	NA	360	CQ	Chloroquine	600 mg d0 + 300 mg d1	900 mg	India	Wild - Dehli, India	P14	P14_126	126	1998	Adak et al, 1998	Outpatients	28.6376	77.2235	8	Frequent relapse + long latency	Frequent relapse + long latency, Old World	Old World	tropical	Old World, tropical
126_1445	No	NA	360	CQ	Chloroquine	600 mg d0 + 300 mg d1	900 mg	India	Wild - Dehli, India	P14	P14_126	126	1998	Adak et al, 1998	Outpatients	28.6376	77.2235	8	Frequent relapse + long latency	Frequent relapse + long latency, Old World	Old World	tropical	Old World, tropical
126_1446	No	NA	360	CQ	Chloroquine	600 mg d0 + 300 mg d1	900 mg	India	Wild - Dehli, India	P14	P14_126	126	1998	Adak et al, 1998	Outpatients	28.6376	77.2235	8	Frequent relapse + long latency	Frequent relapse + long latency, Old World	Old World	tropical	Old World, tropical
126_1447	No	NA	360	CQ	Chloroquine	600 mg d0 + 300 mg d1	900 mg	India	Wild - Dehli, India	P14	P14_126	126	1998	Adak et al, 1998	Outpatients	28.6376	77.2235	8	Frequent relapse + long latency	Frequent relapse + long latency, Old World	Old World	tropical	Old World, tropical
126_1448	No	NA	360	CQ	Chloroquine	600 mg d0 + 300 mg d1	900 mg	India	Wild - Dehli, India	P14	P14_126	126	1998	Adak et al, 1998	Outpatients	28.6376	77.2235	8	Frequent relapse + long latency	Frequent relapse + long latency, Old World	Old World	tropical	Old World, tropical
126_1449	No	NA	360	CQ	Chloroquine	600 mg d0 + 300 mg d1	900 mg	India	Wild - Dehli, India	P14	P14_126	126	1998	Adak et al, 1998	Outpatients	28.6376	77.2235	8	Frequent relapse + long latency	Frequent relapse + long latency, Old World	Old World	tropical	Old World, tropical
126_145	Yes	60	60	CQ	Chloroquine	600 mg d0 + 300 mg d1	900 mg	India	Wild - Dehli, India	P14	P14_126	126	1998	Adak et al, 1998	Outpatients	28.6376	77.2235	8	Frequent relapse + long latency	Frequent relapse + long latency, Old World	Old World	tropical	Old World, tropical
126_1450	No	NA	360	CQ	Chloroquine	600 mg d0 + 300 mg d1	900 mg	India	Wild - Dehli, India	P14	P14_126	126	1998	Adak et al, 1998	Outpatients	28.6376	77.2235	8	Frequent relapse + long latency	Frequent relapse + long latency, Old World	Old World	tropical	Old World, tropical
126_1451	No	NA	360	CQ	Chloroquine	600 mg d0 + 300 mg d1	900 mg	India	Wild - Dehli, India	P14	P14_126	126	1998	Adak et al, 1998	Outpatients	28.6376	77.2235	8	Frequent relapse + long latency	Frequent relapse + long latency, Old World	Old World	tropical	Old World, tropical
126_1452	No	NA	360	CQ	Chloroquine	600 mg d0 + 300 mg d1	900 mg	India	Wild - Dehli, India	P14	P14_126	126	1998	Adak et al, 1998	Outpatients	28.6376	77.2235	8	Frequent relapse + long latency	Frequent relapse + long latency, Old World	Old World	tropical	Old World, tropical
126_1453	No	NA	360	CQ	Chloroquine	600 mg d0 + 300 mg d1	900 mg	India	Wild - Dehli, India	P14	P14_126	126	1998	Adak et al, 1998	Outpatients	28.6376	77.2235	8	Frequent relapse + long latency	Frequent relapse + long latency, Old World	Old World	tropical	Old World, tropical
126_1454	No	NA	360	CQ	Chloroquine	600 mg d0 + 300 mg d1	900 mg	India	Wild - Dehli, India	P14	P14_126	126	1998	Adak et al, 1998	Outpatients	28.6376	77.2235	8	Frequent relapse + long latency	Frequent relapse + long latency, Old World	Old World	tropical	Old World, tropical
126_1455	No	NA	360	CQ	Chloroquine	600 mg d0 + 300 mg d1	900 mg	India	Wild - Dehli, India	P14	P14_126	126	1998	Adak et al, 1998	Outpatients	28.6376	77.2235	8	Frequent relapse + long latency	Frequent relapse + long latency, Old World	Old World	tropical	Old World, tropical
126_1456	No	NA	360	CQ	Chloroquine	600 mg d0 + 300 mg d1	900 mg	India	Wild - Dehli, India	P14	P14_126	126	1998	Adak et al, 1998	Outpatients	28.6376	77.2235	8	Frequent relapse + long latency	Frequent relapse + long latency, Old World	Old World	tropical	Old World, tropical
126_1457	No	NA	360	CQ	Chloroquine	600 mg d0 + 300 mg d1	900 mg	India	Wild - Dehli, India	P14	P14_126	126	1998	Adak et al, 1998	Outpatients	28.6376	77.2235	8	Frequent relapse + long latency	Frequent relapse + long latency, Old World	Old World	tropical	Old World, tropical
126_1458	No	NA	360	CQ	Chloroquine	600 mg d0 + 300 mg d1	900 mg	India	Wild - Dehli, India	P14	P14_126	126	1998	Adak et al, 1998	Outpatients	28.6376	77.2235	8	Frequent relapse + long latency	Frequent relapse + long latency, Old World	Old World	tropical	Old World, tropical
126_1459	No	NA	360	CQ	Chloroquine	600 mg d0 + 300 mg d1	900 mg	India	Wild - Dehli, India	P14	P14_126	126	1998	Adak et al, 1998	Outpatients	28.6376	77.2235	8	Frequent relapse + long latency	Frequent relapse + long latency, Old World	Old World	tropical	Old World, tropical
126_146	Yes	60	60	CQ	Chloroquine	600 mg d0 + 300 mg d1	900 mg	India	Wild - Dehli, India	P14	P14_126	126	1998	Adak et al, 1998	Outpatients	28.6376	77.2235	8	Frequent relapse + long latency	Frequent relapse + long latency, Old World	Old World	tropical	Old World, tropical
126_1460	No	NA	360	CQ	Chloroquine	600 mg d0 + 300 mg d1	900 mg	India	Wild - Dehli, India	P14	P14_126	126	1998	Adak et al, 1998	Outpatients	28.6376	77.2235	8	Frequent relapse + long latency	Frequent relapse + long latency, Old World	Old World	tropical	Old World, tropical
126_1461	No	NA	360	CQ	Chloroquine	600 mg d0 + 300 mg d1	900 mg	India	Wild - Dehli, India	P14	P14_126	126	1998	Adak et al, 1998	Outpatients	28.6376	77.2235	8	Frequent relapse + long latency	Frequent relapse + long latency, Old World	Old World	tropical	Old World, tropical
126_1462	No	NA	360	CQ	Chloroquine	600 mg d0 + 300 mg d1	900 mg	India	Wild - Dehli, India	P14	P14_126	126	1998	Adak et al, 1998	Outpatients	28.6376	77.2235	8	Frequent relapse + long latency	Frequent relapse + long latency, Old World	Old World	tropical	Old World, tropical
126_1463	No	NA	360	CQ	Chloroquine	600 mg d0 + 300 mg d1	900 mg	India	Wild - Dehli, India	P14	P14_126	126	1998	Adak et al, 1998	Outpatients	28.6376	77.2235	8	Frequent relapse + long latency	Frequent relapse + long latency, Old World	Old World	tropical	Old World, tropical
126_1464	No	NA	360	CQ	Chloroquine	600 mg d0 + 300 mg d1	900 mg	India	Wild - Dehli, India	P14	P14_126	126	1998	Adak et al, 1998	Outpatients	28.6376	77.2235	8	Frequent relapse + long latency	Frequent relapse + long latency, Old World	Old World	tropical	Old World, tropical
126_1465	No	NA	360	CQ	Chloroquine	600 mg d0 + 300 mg d1	900 mg	India	Wild - Dehli, India	P14	P14_126	126	1998	Adak et al, 1998	Outpatients	28.6376	77.2235	8	Frequent relapse + long latency	Frequent relapse + long latency, Old World	Old World	tropical	Old World, tropical
126_1466	No	NA	360	CQ	Chloroquine	600 mg d0 + 300 mg d1	900 mg	India	Wild - Dehli, India	P14	P14_126	126	1998	Adak et al, 1998	Outpatients	28.6376	77.2235	8	Frequent relapse + long latency	Frequent relapse + long latency, Old World	Old World	tropical	Old World, tropical
126_1467	No	NA	360	CQ	Chloroquine	600 mg d0 + 300 mg d1	900 mg	India	Wild - Dehli, India	P14	P14_126	126	1998	Adak et al, 1998	Outpatients	28.6376	77.2235	8	Frequent relapse + long latency	Frequent relapse + long latency, Old World	Old World	tropical	Old World, tropical
126_1468	No	NA	360	CQ	Chloroquine	600 mg d0 + 300 mg d1	900 mg	India	Wild - Dehli, India	P14	P14_126	126	1998	Adak et al, 1998	Outpatients	28.6376	77.2235	8	Frequent relapse + long latency	Frequent relapse + long latency, Old World	Old World	tropical	Old World, tropical
126_1469	No	NA	360	CQ	Chloroquine	600 mg d0 + 300 mg d1	900 mg	India	Wild - Dehli, India	P14	P14_126	126	1998	Adak et al, 1998	Outpatients	28.6376	77.2235	8	Frequent relapse + long latency	Frequent relapse + long latency, Old World	Old World	tropical	Old World, tropical
126_147	Yes	60	60	CQ	Chloroquine	600 mg d0 + 300 mg d1	900 mg	India	Wild - Dehli, India	P14	P14_126	126	1998	Adak et al, 1998	Outpatients	28.6376	77.2235	8	Frequent relapse + long latency	Frequent relapse + long latency, Old World	Old World	tropical	Old World, tropical
126_1470	No	NA	360	CQ	Chloroquine	600 mg d0 + 300 mg d1	900 mg	India	Wild - Dehli, India	P14	P14_126	126	1998	Adak et al, 1998	Outpatients	28.6376	77.2235	8	Frequent relapse + long latency	Frequent relapse + long latency, Old World	Old World	tropical	Old World, tropical
126_1471	No	NA	360	CQ	Chloroquine	600 mg d0 + 300 mg d1	900 mg	India	Wild - Dehli, India	P14	P14_126	126	1998	Adak et al, 1998	Outpatients	28.6376	77.2235	8	Frequent relapse + long latency	Frequent relapse + long latency, Old World	Old World	tropical	Old World, tropical
126_1472	No	NA	360	CQ	Chloroquine	600 mg d0 + 300 mg d1	900 mg	India	Wild - Dehli, India	P14	P14_126	126	1998	Adak et al, 1998	Outpatients	28.6376	77.2235	8	Frequent relapse + long latency	Frequent relapse + long latency, Old World	Old World	tropical	Old World, tropical
126_1473	No	NA	360	CQ	Chloroquine	600 mg d0 + 300 mg d1	900 mg	India	Wild - Dehli, India	P14	P14_126	126	1998	Adak et al, 1998	Outpatients	28.6376	77.2235	8	Frequent relapse + long latency	Frequent relapse + long latency, Old World	Old World	tropical	Old World, tropical
126_1474	No	NA	360	CQ	Chloroquine	600 mg d0 + 300 mg d1	900 mg	India	Wild - Dehli, India	P14	P14_126	126	1998	Adak et al, 1998	Outpatients	28.6376	77.2235	8	Frequent relapse + long latency	Frequent relapse + long latency, Old World	Old World	tropical	Old World, tropical
126_1475	No	NA	360	CQ	Chloroquine	600 mg d0 + 300 mg d1	900 mg	India	Wild - Dehli, India	P14	P14_126	126	1998	Adak et al, 1998	Outpatients	28.6376	77.2235	8	Frequent relapse + long latency	Frequent relapse + long latency, Old World	Old World	tropical	Old World, tropical
126_1476	No	NA	360	CQ	Chloroquine	600 mg d0 + 300 mg d1	900 mg	India	Wild - Dehli, India	P14	P14_126	126	1998	Adak et al, 1998	Outpatients	28.6376	77.2235	8	Frequent relapse + long latency	Frequent relapse + long latency, Old World	Old World	tropical	Old World, tropical
126_1477	No	NA	360	CQ	Chloroquine	600 mg d0 + 300 mg d1	900 mg	India	Wild - Dehli, India	P14	P14_126	126	1998	Adak et al, 1998	Outpatients	28.6376	77.2235	8	Frequent relapse + long latency	Frequent relapse + long latency, Old World	Old World	tropical	Old World, tropical
126_1478	No	NA	360	CQ	Chloroquine	600 mg d0 + 300 mg d1	900 mg	India	Wild - Dehli, India	P14	P14_126	126	1998	Adak et al, 1998	Outpatients	28.6376	77.2235	8	Frequent relapse + long latency	Frequent relapse + long latency, Old World	Old World	tropical	Old World, tropical
126_1479	No	NA	360	CQ	Chloroquine	600 mg d0 + 300 mg d1	900 mg	India	Wild - Dehli, India	P14	P14_126	126	1998	Adak et al, 1998	Outpatients	28.6376	77.2235	8	Frequent relapse + long latency	Frequent relapse + long latency, Old World	Old World	tropical	Old World, tropical
126_148	Yes	60	60	CQ	Chloroquine	600 mg d0 + 300 mg d1	900 mg	India	Wild - Dehli, India	P14	P14_126	126	1998	Adak et al, 1998	Outpatients	28.6376	77.2235	8	Frequent relapse + long latency	Frequent relapse + long latency, Old World	Old World	tropical	Old World, tropical
126_1480	No	NA	360	CQ	Chloroquine	600 mg d0 + 300 mg d1	900 mg	India	Wild - Dehli, India	P14	P14_126	126	1998	Adak et al, 1998	Outpatients	28.6376	77.2235	8	Frequent relapse + long latency	Frequent relapse + long latency, Old World	Old World	tropical	Old World, tropical
126_1481	No	NA	360	CQ	Chloroquine	600 mg d0 + 300 mg d1	900 mg	India	Wild - Dehli, India	P14	P14_126	126	1998	Adak et al, 1998	Outpatients	28.6376	77.2235	8	Frequent relapse + long latency	Frequent relapse + long latency, Old World	Old World	tropical	Old World, tropical
126_1482	No	NA	360	CQ	Chloroquine	600 mg d0 + 300 mg d1	900 mg	India	Wild - Dehli, India	P14	P14_126	126	1998	Adak et al, 1998	Outpatients	28.6376	77.2235	8	Frequent relapse + long latency	Frequent relapse + long latency, Old World	Old World	tropical	Old World, tropical
126_1483	No	NA	360	CQ	Chloroquine	600 mg d0 + 300 mg d1	900 mg	India	Wild - Dehli, India	P14	P14_126	126	1998	Adak et al, 1998	Outpatients	28.6376	77.2235	8	Frequent relapse + long latency	Frequent relapse + long latency, Old World	Old World	tropical	Old World, tropical
126_1484	No	NA	360	CQ	Chloroquine	600 mg d0 + 300 mg d1	900 mg	India	Wild - Dehli, India	P14	P14_126	126	1998	Adak et al, 1998	Outpatients	28.6376	77.2235	8	Frequent relapse + long latency	Frequent relapse + long latency, Old World	Old World	tropical	Old World, tropical
126_1485	No	NA	360	CQ	Chloroquine	600 mg d0 + 300 mg d1	900 mg	India	Wild - Dehli, India	P14	P14_126	126	1998	Adak et al, 1998	Outpatients	28.6376	77.2235	8	Frequent relapse + long latency	Frequent relapse + long latency, Old World	Old World	tropical	Old World, tropical
126_1486	No	NA	360	CQ	Chloroquine	600 mg d0 + 300 mg d1	900 mg	India	Wild - Dehli, India	P14	P14_126	126	1998	Adak et al, 1998	Outpatients	28.6376	77.2235	8	Frequent relapse + long latency	Frequent relapse + long latency, Old World	Old World	tropical	Old World, tropical
126_1487	No	NA	360	CQ	Chloroquine	600 mg d0 + 300 mg d1	900 mg	India	Wild - Dehli, India	P14	P14_126	126	1998	Adak et al, 1998	Outpatients	28.6376	77.2235	8	Frequent relapse + long latency	Frequent relapse + long latency, Old World	Old World	tropical	Old World, tropical
126_1488	No	NA	360	CQ	Chloroquine	600 mg d0 + 300 mg d1	900 mg	India	Wild - Dehli, India	P14	P14_126	126	1998	Adak et al, 1998	Outpatients	28.6376	77.2235	8	Frequent relapse + long latency	Frequent relapse + long latency, Old World	Old World	tropical	Old World, tropical
126_1489	No	NA	360	CQ	Chloroquine	600 mg d0 + 300 mg d1	900 mg	India	Wild - Dehli, India	P14	P14_126	126	1998	Adak et al, 1998	Outpatients	28.6376	77.2235	8	Frequent relapse + long latency	Frequent relapse + long latency, Old World	Old World	tropical	Old World, tropical
126_149	Yes	60	60	CQ	Chloroquine	600 mg d0 + 300 mg d1	900 mg	India	Wild - Dehli, India	P14	P14_126	126	1998	Adak et al, 1998	Outpatients	28.6376	77.2235	8	Frequent relapse + long latency	Frequent relapse + long latency, Old World	Old World	tropical	Old World, tropical
126_1490	No	NA	360	CQ	Chloroquine	600 mg d0 + 300 mg d1	900 mg	India	Wild - Dehli, India	P14	P14_126	126	1998	Adak et al, 1998	Outpatients	28.6376	77.2235	8	Frequent relapse + long latency	Frequent relapse + long latency, Old World	Old World	tropical	Old World, tropical
126_1491	No	NA	360	CQ	Chloroquine	600 mg d0 + 300 mg d1	900 mg	India	Wild - Dehli, India	P14	P14_126	126	1998	Adak et al, 1998	Outpatients	28.6376	77.2235	8	Frequent relapse + long latency	Frequent relapse + long latency, Old World	Old World	tropical	Old World, tropical
126_1492	No	NA	360	CQ	Chloroquine	600 mg d0 + 300 mg d1	900 mg	India	Wild - Dehli, India	P14	P14_126	126	1998	Adak et al, 1998	Outpatients	28.6376	77.2235	8	Frequent relapse + long latency	Frequent relapse + long latency, Old World	Old World	tropical	Old World, tropical
126_1493	No	NA	360	CQ	Chloroquine	600 mg d0 + 300 mg d1	900 mg	India	Wild - Dehli, India	P14	P14_126	126	1998	Adak et al, 1998	Outpatients	28.6376	77.2235	8	Frequent relapse + long latency	Frequent relapse + long latency, Old World	Old World	tropical	Old World, tropical
126_1494	No	NA	360	CQ	Chloroquine	600 mg d0 + 300 mg d1	900 mg	India	Wild - Dehli, India	P14	P14_126	126	1998	Adak et al, 1998	Outpatients	28.6376	77.2235	8	Frequent relapse + long latency	Frequent relapse + long latency, Old World	Old World	tropical	Old World, tropical
126_1495	No	NA	360	CQ	Chloroquine	600 mg d0 + 300 mg d1	900 mg	India	Wild - Dehli, India	P14	P14_126	126	1998	Adak et al, 1998	Outpatients	28.6376	77.2235	8	Frequent relapse + long latency	Frequent relapse + long latency, Old World	Old World	tropical	Old World, tropical
126_1496	No	NA	360	CQ	Chloroquine	600 mg d0 + 300 mg d1	900 mg	India	Wild - Dehli, India	P14	P14_126	126	1998	Adak et al, 1998	Outpatients	28.6376	77.2235	8	Frequent relapse + long latency	Frequent relapse + long latency, Old World	Old World	tropical	Old World, tropical
126_1497	No	NA	360	CQ	Chloroquine	600 mg d0 + 300 mg d1	900 mg	India	Wild - Dehli, India	P14	P14_126	126	1998	Adak et al, 1998	Outpatients	28.6376	77.2235	8	Frequent relapse + long latency	Frequent relapse + long latency, Old World	Old World	tropical	Old World, tropical
126_1498	No	NA	360	CQ	Chloroquine	600 mg d0 + 300 mg d1	900 mg	India	Wild - Dehli, India	P14	P14_126	126	1998	Adak et al, 1998	Outpatients	28.6376	77.2235	8	Frequent relapse + long latency	Frequent relapse + long latency, Old World	Old World	tropical	Old World, tropical
126_1499	No	NA	360	CQ	Chloroquine	600 mg d0 + 300 mg d1	900 mg	India	Wild - Dehli, India	P14	P14_126	126	1998	Adak et al, 1998	Outpatients	28.6376	77.2235	8	Frequent relapse + long latency	Frequent relapse + long latency, Old World	Old World	tropical	Old World, tropical
126_15	Yes	30	30	CQ	Chloroquine	600 mg d0 + 300 mg d1	900 mg	India	Wild - Dehli, India	P14	P14_126	126	1998	Adak et al, 1998	Outpatients	28.6376	77.2235	8	Frequent relapse + long latency	Frequent relapse + long latency, Old World	Old World	tropical	Old World, tropical
126_150	Yes	60	60	CQ	Chloroquine	600 mg d0 + 300 mg d1	900 mg	India	Wild - Dehli, India	P14	P14_126	126	1998	Adak et al, 1998	Outpatients	28.6376	77.2235	8	Frequent relapse + long latency	Frequent relapse + long latency, Old World	Old World	tropical	Old World, tropical
126_1500	No	NA	360	CQ	Chloroquine	600 mg d0 + 300 mg d1	900 mg	India	Wild - Dehli, India	P14	P14_126	126	1998	Adak et al, 1998	Outpatients	28.6376	77.2235	8	Frequent relapse + long latency	Frequent relapse + long latency, Old World	Old World	tropical	Old World, tropical
126_1501	No	NA	360	CQ	Chloroquine	600 mg d0 + 300 mg d1	900 mg	India	Wild - Dehli, India	P14	P14_126	126	1998	Adak et al, 1998	Outpatients	28.6376	77.2235	8	Frequent relapse + long latency	Frequent relapse + long latency, Old World	Old World	tropical	Old World, tropical
126_1502	No	NA	360	CQ	Chloroquine	600 mg d0 + 300 mg d1	900 mg	India	Wild - Dehli, India	P14	P14_126	126	1998	Adak et al, 1998	Outpatients	28.6376	77.2235	8	Frequent relapse + long latency	Frequent relapse + long latency, Old World	Old World	tropical	Old World, tropical
126_1503	No	NA	360	CQ	Chloroquine	600 mg d0 + 300 mg d1	900 mg	India	Wild - Dehli, India	P14	P14_126	126	1998	Adak et al, 1998	Outpatients	28.6376	77.2235	8	Frequent relapse + long latency	Frequent relapse + long latency, Old World	Old World	tropical	Old World, tropical
126_1504	No	NA	360	CQ	Chloroquine	600 mg d0 + 300 mg d1	900 mg	India	Wild - Dehli, India	P14	P14_126	126	1998	Adak et al, 1998	Outpatients	28.6376	77.2235	8	Frequent relapse + long latency	Frequent relapse + long latency, Old World	Old World	tropical	Old World, tropical
126_1505	No	NA	360	CQ	Chloroquine	600 mg d0 + 300 mg d1	900 mg	India	Wild - Dehli, India	P14	P14_126	126	1998	Adak et al, 1998	Outpatients	28.6376	77.2235	8	Frequent relapse + long latency	Frequent relapse + long latency, Old World	Old World	tropical	Old World, tropical
126_1506	No	NA	360	CQ	Chloroquine	600 mg d0 + 300 mg d1	900 mg	India	Wild - Dehli, India	P14	P14_126	126	1998	Adak et al, 1998	Outpatients	28.6376	77.2235	8	Frequent relapse + long latency	Frequent relapse + long latency, Old World	Old World	tropical	Old World, tropical
126_1507	No	NA	360	CQ	Chloroquine	600 mg d0 + 300 mg d1	900 mg	India	Wild - Dehli, India	P14	P14_126	126	1998	Adak et al, 1998	Outpatients	28.6376	77.2235	8	Frequent relapse + long latency	Frequent relapse + long latency, Old World	Old World	tropical	Old World, tropical
126_1508	No	NA	360	CQ	Chloroquine	600 mg d0 + 300 mg d1	900 mg	India	Wild - Dehli, India	P14	P14_126	126	1998	Adak et al, 1998	Outpatients	28.6376	77.2235	8	Frequent relapse + long latency	Frequent relapse + long latency, Old World	Old World	tropical	Old World, tropical
126_1509	No	NA	360	CQ	Chloroquine	600 mg d0 + 300 mg d1	900 mg	India	Wild - Dehli, India	P14	P14_126	126	1998	Adak et al, 1998	Outpatients	28.6376	77.2235	8	Frequent relapse + long latency	Frequent relapse + long latency, Old World	Old World	tropical	Old World, tropical
126_151	Yes	60	60	CQ	Chloroquine	600 mg d0 + 300 mg d1	900 mg	India	Wild - Dehli, India	P14	P14_126	126	1998	Adak et al, 1998	Outpatients	28.6376	77.2235	8	Frequent relapse + long latency	Frequent relapse + long latency, Old World	Old World	tropical	Old World, tropical
126_1510	No	NA	360	CQ	Chloroquine	600 mg d0 + 300 mg d1	900 mg	India	Wild - Dehli, India	P14	P14_126	126	1998	Adak et al, 1998	Outpatients	28.6376	77.2235	8	Frequent relapse + long latency	Frequent relapse + long latency, Old World	Old World	tropical	Old World, tropical
126_1511	No	NA	360	CQ	Chloroquine	600 mg d0 + 300 mg d1	900 mg	India	Wild - Dehli, India	P14	P14_126	126	1998	Adak et al, 1998	Outpatients	28.6376	77.2235	8	Frequent relapse + long latency	Frequent relapse + long latency, Old World	Old World	tropical	Old World, tropical
126_1512	No	NA	360	CQ	Chloroquine	600 mg d0 + 300 mg d1	900 mg	India	Wild - Dehli, India	P14	P14_126	126	1998	Adak et al, 1998	Outpatients	28.6376	77.2235	8	Frequent relapse + long latency	Frequent relapse + long latency, Old World	Old World	tropical	Old World, tropical
126_1513	No	NA	360	CQ	Chloroquine	600 mg d0 + 300 mg d1	900 mg	India	Wild - Dehli, India	P14	P14_126	126	1998	Adak et al, 1998	Outpatients	28.6376	77.2235	8	Frequent relapse + long latency	Frequent relapse + long latency, Old World	Old World	tropical	Old World, tropical
126_1514	No	NA	360	CQ	Chloroquine	600 mg d0 + 300 mg d1	900 mg	India	Wild - Dehli, India	P14	P14_126	126	1998	Adak et al, 1998	Outpatients	28.6376	77.2235	8	Frequent relapse + long latency	Frequent relapse + long latency, Old World	Old World	tropical	Old World, tropical
126_1515	No	NA	360	CQ	Chloroquine	600 mg d0 + 300 mg d1	900 mg	India	Wild - Dehli, India	P14	P14_126	126	1998	Adak et al, 1998	Outpatients	28.6376	77.2235	8	Frequent relapse + long latency	Frequent relapse + long latency, Old World	Old World	tropical	Old World, tropical
126_1516	No	NA	360	CQ	Chloroquine	600 mg d0 + 300 mg d1	900 mg	India	Wild - Dehli, India	P14	P14_126	126	1998	Adak et al, 1998	Outpatients	28.6376	77.2235	8	Frequent relapse + long latency	Frequent relapse + long latency, Old World	Old World	tropical	Old World, tropical
126_1517	No	NA	360	CQ	Chloroquine	600 mg d0 + 300 mg d1	900 mg	India	Wild - Dehli, India	P14	P14_126	126	1998	Adak et al, 1998	Outpatients	28.6376	77.2235	8	Frequent relapse + long latency	Frequent relapse + long latency, Old World	Old World	tropical	Old World, tropical
126_1518	No	NA	360	CQ	Chloroquine	600 mg d0 + 300 mg d1	900 mg	India	Wild - Dehli, India	P14	P14_126	126	1998	Adak et al, 1998	Outpatients	28.6376	77.2235	8	Frequent relapse + long latency	Frequent relapse + long latency, Old World	Old World	tropical	Old World, tropical
126_1519	No	NA	360	CQ	Chloroquine	600 mg d0 + 300 mg d1	900 mg	India	Wild - Dehli, India	P14	P14_126	126	1998	Adak et al, 1998	Outpatients	28.6376	77.2235	8	Frequent relapse + long latency	Frequent relapse + long latency, Old World	Old World	tropical	Old World, tropical
126_152	Yes	60	60	CQ	Chloroquine	600 mg d0 + 300 mg d1	900 mg	India	Wild - Dehli, India	P14	P14_126	126	1998	Adak et al, 1998	Outpatients	28.6376	77.2235	8	Frequent relapse + long latency	Frequent relapse + long latency, Old World	Old World	tropical	Old World, tropical
126_1520	No	NA	360	CQ	Chloroquine	600 mg d0 + 300 mg d1	900 mg	India	Wild - Dehli, India	P14	P14_126	126	1998	Adak et al, 1998	Outpatients	28.6376	77.2235	8	Frequent relapse + long latency	Frequent relapse + long latency, Old World	Old World	tropical	Old World, tropical
126_1521	No	NA	360	CQ	Chloroquine	600 mg d0 + 300 mg d1	900 mg	India	Wild - Dehli, India	P14	P14_126	126	1998	Adak et al, 1998	Outpatients	28.6376	77.2235	8	Frequent relapse + long latency	Frequent relapse + long latency, Old World	Old World	tropical	Old World, tropical
126_1522	No	NA	360	CQ	Chloroquine	600 mg d0 + 300 mg d1	900 mg	India	Wild - Dehli, India	P14	P14_126	126	1998	Adak et al, 1998	Outpatients	28.6376	77.2235	8	Frequent relapse + long latency	Frequent relapse + long latency, Old World	Old World	tropical	Old World, tropical
126_1523	No	NA	360	CQ	Chloroquine	600 mg d0 + 300 mg d1	900 mg	India	Wild - Dehli, India	P14	P14_126	126	1998	Adak et al, 1998	Outpatients	28.6376	77.2235	8	Frequent relapse + long latency	Frequent relapse + long latency, Old World	Old World	tropical	Old World, tropical
126_1524	No	NA	360	CQ	Chloroquine	600 mg d0 + 300 mg d1	900 mg	India	Wild - Dehli, India	P14	P14_126	126	1998	Adak et al, 1998	Outpatients	28.6376	77.2235	8	Frequent relapse + long latency	Frequent relapse + long latency, Old World	Old World	tropical	Old World, tropical
126_1525	No	NA	360	CQ	Chloroquine	600 mg d0 + 300 mg d1	900 mg	India	Wild - Dehli, India	P14	P14_126	126	1998	Adak et al, 1998	Outpatients	28.6376	77.2235	8	Frequent relapse + long latency	Frequent relapse + long latency, Old World	Old World	tropical	Old World, tropical
126_1526	No	NA	360	CQ	Chloroquine	600 mg d0 + 300 mg d1	900 mg	India	Wild - Dehli, India	P14	P14_126	126	1998	Adak et al, 1998	Outpatients	28.6376	77.2235	8	Frequent relapse + long latency	Frequent relapse + long latency, Old World	Old World	tropical	Old World, tropical
126_1527	No	NA	360	CQ	Chloroquine	600 mg d0 + 300 mg d1	900 mg	India	Wild - Dehli, India	P14	P14_126	126	1998	Adak et al, 1998	Outpatients	28.6376	77.2235	8	Frequent relapse + long latency	Frequent relapse + long latency, Old World	Old World	tropical	Old World, tropical
126_1528	No	NA	360	CQ	Chloroquine	600 mg d0 + 300 mg d1	900 mg	India	Wild - Dehli, India	P14	P14_126	126	1998	Adak et al, 1998	Outpatients	28.6376	77.2235	8	Frequent relapse + long latency	Frequent relapse + long latency, Old World	Old World	tropical	Old World, tropical
126_1529	No	NA	360	CQ	Chloroquine	600 mg d0 + 300 mg d1	900 mg	India	Wild - Dehli, India	P14	P14_126	126	1998	Adak et al, 1998	Outpatients	28.6376	77.2235	8	Frequent relapse + long latency	Frequent relapse + long latency, Old World	Old World	tropical	Old World, tropical
126_153	Yes	60	60	CQ	Chloroquine	600 mg d0 + 300 mg d1	900 mg	India	Wild - Dehli, India	P14	P14_126	126	1998	Adak et al, 1998	Outpatients	28.6376	77.2235	8	Frequent relapse + long latency	Frequent relapse + long latency, Old World	Old World	tropical	Old World, tropical
126_1530	No	NA	360	CQ	Chloroquine	600 mg d0 + 300 mg d1	900 mg	India	Wild - Dehli, India	P14	P14_126	126	1998	Adak et al, 1998	Outpatients	28.6376	77.2235	8	Frequent relapse + long latency	Frequent relapse + long latency, Old World	Old World	tropical	Old World, tropical
126_1531	No	NA	360	CQ	Chloroquine	600 mg d0 + 300 mg d1	900 mg	India	Wild - Dehli, India	P14	P14_126	126	1998	Adak et al, 1998	Outpatients	28.6376	77.2235	8	Frequent relapse + long latency	Frequent relapse + long latency, Old World	Old World	tropical	Old World, tropical
126_1532	No	NA	360	CQ	Chloroquine	600 mg d0 + 300 mg d1	900 mg	India	Wild - Dehli, India	P14	P14_126	126	1998	Adak et al, 1998	Outpatients	28.6376	77.2235	8	Frequent relapse + long latency	Frequent relapse + long latency, Old World	Old World	tropical	Old World, tropical
126_1533	No	NA	360	CQ	Chloroquine	600 mg d0 + 300 mg d1	900 mg	India	Wild - Dehli, India	P14	P14_126	126	1998	Adak et al, 1998	Outpatients	28.6376	77.2235	8	Frequent relapse + long latency	Frequent relapse + long latency, Old World	Old World	tropical	Old World, tropical
126_1534	No	NA	360	CQ	Chloroquine	600 mg d0 + 300 mg d1	900 mg	India	Wild - Dehli, India	P14	P14_126	126	1998	Adak et al, 1998	Outpatients	28.6376	77.2235	8	Frequent relapse + long latency	Frequent relapse + long latency, Old World	Old World	tropical	Old World, tropical
126_1535	No	NA	360	CQ	Chloroquine	600 mg d0 + 300 mg d1	900 mg	India	Wild - Dehli, India	P14	P14_126	126	1998	Adak et al, 1998	Outpatients	28.6376	77.2235	8	Frequent relapse + long latency	Frequent relapse + long latency, Old World	Old World	tropical	Old World, tropical
126_1536	No	NA	360	CQ	Chloroquine	600 mg d0 + 300 mg d1	900 mg	India	Wild - Dehli, India	P14	P14_126	126	1998	Adak et al, 1998	Outpatients	28.6376	77.2235	8	Frequent relapse + long latency	Frequent relapse + long latency, Old World	Old World	tropical	Old World, tropical
126_1537	No	NA	360	CQ	Chloroquine	600 mg d0 + 300 mg d1	900 mg	India	Wild - Dehli, India	P14	P14_126	126	1998	Adak et al, 1998	Outpatients	28.6376	77.2235	8	Frequent relapse + long latency	Frequent relapse + long latency, Old World	Old World	tropical	Old World, tropical
126_1538	No	NA	360	CQ	Chloroquine	600 mg d0 + 300 mg d1	900 mg	India	Wild - Dehli, India	P14	P14_126	126	1998	Adak et al, 1998	Outpatients	28.6376	77.2235	8	Frequent relapse + long latency	Frequent relapse + long latency, Old World	Old World	tropical	Old World, tropical
126_1539	No	NA	360	CQ	Chloroquine	600 mg d0 + 300 mg d1	900 mg	India	Wild - Dehli, India	P14	P14_126	126	1998	Adak et al, 1998	Outpatients	28.6376	77.2235	8	Frequent relapse + long latency	Frequent relapse + long latency, Old World	Old World	tropical	Old World, tropical
126_154	Yes	60	60	CQ	Chloroquine	600 mg d0 + 300 mg d1	900 mg	India	Wild - Dehli, India	P14	P14_126	126	1998	Adak et al, 1998	Outpatients	28.6376	77.2235	8	Frequent relapse + long latency	Frequent relapse + long latency, Old World	Old World	tropical	Old World, tropical
126_1540	No	NA	360	CQ	Chloroquine	600 mg d0 + 300 mg d1	900 mg	India	Wild - Dehli, India	P14	P14_126	126	1998	Adak et al, 1998	Outpatients	28.6376	77.2235	8	Frequent relapse + long latency	Frequent relapse + long latency, Old World	Old World	tropical	Old World, tropical
126_1541	No	NA	360	CQ	Chloroquine	600 mg d0 + 300 mg d1	900 mg	India	Wild - Dehli, India	P14	P14_126	126	1998	Adak et al, 1998	Outpatients	28.6376	77.2235	8	Frequent relapse + long latency	Frequent relapse + long latency, Old World	Old World	tropical	Old World, tropical
126_1542	No	NA	360	CQ	Chloroquine	600 mg d0 + 300 mg d1	900 mg	India	Wild - Dehli, India	P14	P14_126	126	1998	Adak et al, 1998	Outpatients	28.6376	77.2235	8	Frequent relapse + long latency	Frequent relapse + long latency, Old World	Old World	tropical	Old World, tropical
126_1543	No	NA	360	CQ	Chloroquine	600 mg d0 + 300 mg d1	900 mg	India	Wild - Dehli, India	P14	P14_126	126	1998	Adak et al, 1998	Outpatients	28.6376	77.2235	8	Frequent relapse + long latency	Frequent relapse + long latency, Old World	Old World	tropical	Old World, tropical
126_1544	No	NA	360	CQ	Chloroquine	600 mg d0 + 300 mg d1	900 mg	India	Wild - Dehli, India	P14	P14_126	126	1998	Adak et al, 1998	Outpatients	28.6376	77.2235	8	Frequent relapse + long latency	Frequent relapse + long latency, Old World	Old World	tropical	Old World, tropical
126_1545	No	NA	360	CQ	Chloroquine	600 mg d0 + 300 mg d1	900 mg	India	Wild - Dehli, India	P14	P14_126	126	1998	Adak et al, 1998	Outpatients	28.6376	77.2235	8	Frequent relapse + long latency	Frequent relapse + long latency, Old World	Old World	tropical	Old World, tropical
126_1546	No	NA	360	CQ	Chloroquine	600 mg d0 + 300 mg d1	900 mg	India	Wild - Dehli, India	P14	P14_126	126	1998	Adak et al, 1998	Outpatients	28.6376	77.2235	8	Frequent relapse + long latency	Frequent relapse + long latency, Old World	Old World	tropical	Old World, tropical
126_1547	No	NA	360	CQ	Chloroquine	600 mg d0 + 300 mg d1	900 mg	India	Wild - Dehli, India	P14	P14_126	126	1998	Adak et al, 1998	Outpatients	28.6376	77.2235	8	Frequent relapse + long latency	Frequent relapse + long latency, Old World	Old World	tropical	Old World, tropical
126_1548	No	NA	360	CQ	Chloroquine	600 mg d0 + 300 mg d1	900 mg	India	Wild - Dehli, India	P14	P14_126	126	1998	Adak et al, 1998	Outpatients	28.6376	77.2235	8	Frequent relapse + long latency	Frequent relapse + long latency, Old World	Old World	tropical	Old World, tropical
126_1549	No	NA	360	CQ	Chloroquine	600 mg d0 + 300 mg d1	900 mg	India	Wild - Dehli, India	P14	P14_126	126	1998	Adak et al, 1998	Outpatients	28.6376	77.2235	8	Frequent relapse + long latency	Frequent relapse + long latency, Old World	Old World	tropical	Old World, tropical
126_155	Yes	60	60	CQ	Chloroquine	600 mg d0 + 300 mg d1	900 mg	India	Wild - Dehli, India	P14	P14_126	126	1998	Adak et al, 1998	Outpatients	28.6376	77.2235	8	Frequent relapse + long latency	Frequent relapse + long latency, Old World	Old World	tropical	Old World, tropical
126_1550	No	NA	360	CQ	Chloroquine	600 mg d0 + 300 mg d1	900 mg	India	Wild - Dehli, India	P14	P14_126	126	1998	Adak et al, 1998	Outpatients	28.6376	77.2235	8	Frequent relapse + long latency	Frequent relapse + long latency, Old World	Old World	tropical	Old World, tropical
126_1551	No	NA	360	CQ	Chloroquine	600 mg d0 + 300 mg d1	900 mg	India	Wild - Dehli, India	P14	P14_126	126	1998	Adak et al, 1998	Outpatients	28.6376	77.2235	8	Frequent relapse + long latency	Frequent relapse + long latency, Old World	Old World	tropical	Old World, tropical
126_1552	No	NA	360	CQ	Chloroquine	600 mg d0 + 300 mg d1	900 mg	India	Wild - Dehli, India	P14	P14_126	126	1998	Adak et al, 1998	Outpatients	28.6376	77.2235	8	Frequent relapse + long latency	Frequent relapse + long latency, Old World	Old World	tropical	Old World, tropical
126_1553	No	NA	360	CQ	Chloroquine	600 mg d0 + 300 mg d1	900 mg	India	Wild - Dehli, India	P14	P14_126	126	1998	Adak et al, 1998	Outpatients	28.6376	77.2235	8	Frequent relapse + long latency	Frequent relapse + long latency, Old World	Old World	tropical	Old World, tropical
126_1554	No	NA	360	CQ	Chloroquine	600 mg d0 + 300 mg d1	900 mg	India	Wild - Dehli, India	P14	P14_126	126	1998	Adak et al, 1998	Outpatients	28.6376	77.2235	8	Frequent relapse + long latency	Frequent relapse + long latency, Old World	Old World	tropical	Old World, tropical
126_1555	No	NA	360	CQ	Chloroquine	600 mg d0 + 300 mg d1	900 mg	India	Wild - Dehli, India	P14	P14_126	126	1998	Adak et al, 1998	Outpatients	28.6376	77.2235	8	Frequent relapse + long latency	Frequent relapse + long latency, Old World	Old World	tropical	Old World, tropical
126_1556	No	NA	360	CQ	Chloroquine	600 mg d0 + 300 mg d1	900 mg	India	Wild - Dehli, India	P14	P14_126	126	1998	Adak et al, 1998	Outpatients	28.6376	77.2235	8	Frequent relapse + long latency	Frequent relapse + long latency, Old World	Old World	tropical	Old World, tropical
126_1557	No	NA	360	CQ	Chloroquine	600 mg d0 + 300 mg d1	900 mg	India	Wild - Dehli, India	P14	P14_126	126	1998	Adak et al, 1998	Outpatients	28.6376	77.2235	8	Frequent relapse + long latency	Frequent relapse + long latency, Old World	Old World	tropical	Old World, tropical
126_1558	No	NA	360	CQ	Chloroquine	600 mg d0 + 300 mg d1	900 mg	India	Wild - Dehli, India	P14	P14_126	126	1998	Adak et al, 1998	Outpatients	28.6376	77.2235	8	Frequent relapse + long latency	Frequent relapse + long latency, Old World	Old World	tropical	Old World, tropical
126_1559	No	NA	360	CQ	Chloroquine	600 mg d0 + 300 mg d1	900 mg	India	Wild - Dehli, India	P14	P14_126	126	1998	Adak et al, 1998	Outpatients	28.6376	77.2235	8	Frequent relapse + long latency	Frequent relapse + long latency, Old World	Old World	tropical	Old World, tropical
126_156	Yes	60	60	CQ	Chloroquine	600 mg d0 + 300 mg d1	900 mg	India	Wild - Dehli, India	P14	P14_126	126	1998	Adak et al, 1998	Outpatients	28.6376	77.2235	8	Frequent relapse + long latency	Frequent relapse + long latency, Old World	Old World	tropical	Old World, tropical
126_1560	No	NA	360	CQ	Chloroquine	600 mg d0 + 300 mg d1	900 mg	India	Wild - Dehli, India	P14	P14_126	126	1998	Adak et al, 1998	Outpatients	28.6376	77.2235	8	Frequent relapse + long latency	Frequent relapse + long latency, Old World	Old World	tropical	Old World, tropical
126_1561	No	NA	360	CQ	Chloroquine	600 mg d0 + 300 mg d1	900 mg	India	Wild - Dehli, India	P14	P14_126	126	1998	Adak et al, 1998	Outpatients	28.6376	77.2235	8	Frequent relapse + long latency	Frequent relapse + long latency, Old World	Old World	tropical	Old World, tropical
126_1562	No	NA	360	CQ	Chloroquine	600 mg d0 + 300 mg d1	900 mg	India	Wild - Dehli, India	P14	P14_126	126	1998	Adak et al, 1998	Outpatients	28.6376	77.2235	8	Frequent relapse + long latency	Frequent relapse + long latency, Old World	Old World	tropical	Old World, tropical
126_1563	No	NA	360	CQ	Chloroquine	600 mg d0 + 300 mg d1	900 mg	India	Wild - Dehli, India	P14	P14_126	126	1998	Adak et al, 1998	Outpatients	28.6376	77.2235	8	Frequent relapse + long latency	Frequent relapse + long latency, Old World	Old World	tropical	Old World, tropical
126_1564	No	NA	360	CQ	Chloroquine	600 mg d0 + 300 mg d1	900 mg	India	Wild - Dehli, India	P14	P14_126	126	1998	Adak et al, 1998	Outpatients	28.6376	77.2235	8	Frequent relapse + long latency	Frequent relapse + long latency, Old World	Old World	tropical	Old World, tropical
126_1565	No	NA	360	CQ	Chloroquine	600 mg d0 + 300 mg d1	900 mg	India	Wild - Dehli, India	P14	P14_126	126	1998	Adak et al, 1998	Outpatients	28.6376	77.2235	8	Frequent relapse + long latency	Frequent relapse + long latency, Old World	Old World	tropical	Old World, tropical
126_1566	No	NA	360	CQ	Chloroquine	600 mg d0 + 300 mg d1	900 mg	India	Wild - Dehli, India	P14	P14_126	126	1998	Adak et al, 1998	Outpatients	28.6376	77.2235	8	Frequent relapse + long latency	Frequent relapse + long latency, Old World	Old World	tropical	Old World, tropical
126_1567	No	NA	360	CQ	Chloroquine	600 mg d0 + 300 mg d1	900 mg	India	Wild - Dehli, India	P14	P14_126	126	1998	Adak et al, 1998	Outpatients	28.6376	77.2235	8	Frequent relapse + long latency	Frequent relapse + long latency, Old World	Old World	tropical	Old World, tropical
126_1568	No	NA	360	CQ	Chloroquine	600 mg d0 + 300 mg d1	900 mg	India	Wild - Dehli, India	P14	P14_126	126	1998	Adak et al, 1998	Outpatients	28.6376	77.2235	8	Frequent relapse + long latency	Frequent relapse + long latency, Old World	Old World	tropical	Old World, tropical
126_1569	No	NA	360	CQ	Chloroquine	600 mg d0 + 300 mg d1	900 mg	India	Wild - Dehli, India	P14	P14_126	126	1998	Adak et al, 1998	Outpatients	28.6376	77.2235	8	Frequent relapse + long latency	Frequent relapse + long latency, Old World	Old World	tropical	Old World, tropical
126_157	Yes	60	60	CQ	Chloroquine	600 mg d0 + 300 mg d1	900 mg	India	Wild - Dehli, India	P14	P14_126	126	1998	Adak et al, 1998	Outpatients	28.6376	77.2235	8	Frequent relapse + long latency	Frequent relapse + long latency, Old World	Old World	tropical	Old World, tropical
126_1570	No	NA	360	CQ	Chloroquine	600 mg d0 + 300 mg d1	900 mg	India	Wild - Dehli, India	P14	P14_126	126	1998	Adak et al, 1998	Outpatients	28.6376	77.2235	8	Frequent relapse + long latency	Frequent relapse + long latency, Old World	Old World	tropical	Old World, tropical
126_1571	No	NA	360	CQ	Chloroquine	600 mg d0 + 300 mg d1	900 mg	India	Wild - Dehli, India	P14	P14_126	126	1998	Adak et al, 1998	Outpatients	28.6376	77.2235	8	Frequent relapse + long latency	Frequent relapse + long latency, Old World	Old World	tropical	Old World, tropical
126_1572	No	NA	360	CQ	Chloroquine	600 mg d0 + 300 mg d1	900 mg	India	Wild - Dehli, India	P14	P14_126	126	1998	Adak et al, 1998	Outpatients	28.6376	77.2235	8	Frequent relapse + long latency	Frequent relapse + long latency, Old World	Old World	tropical	Old World, tropical
126_1573	No	NA	360	CQ	Chloroquine	600 mg d0 + 300 mg d1	900 mg	India	Wild - Dehli, India	P14	P14_126	126	1998	Adak et al, 1998	Outpatients	28.6376	77.2235	8	Frequent relapse + long latency	Frequent relapse + long latency, Old World	Old World	tropical	Old World, tropical
126_1574	No	NA	360	CQ	Chloroquine	600 mg d0 + 300 mg d1	900 mg	India	Wild - Dehli, India	P14	P14_126	126	1998	Adak et al, 1998	Outpatients	28.6376	77.2235	8	Frequent relapse + long latency	Frequent relapse + long latency, Old World	Old World	tropical	Old World, tropical
126_1575	No	NA	360	CQ	Chloroquine	600 mg d0 + 300 mg d1	900 mg	India	Wild - Dehli, India	P14	P14_126	126	1998	Adak et al, 1998	Outpatients	28.6376	77.2235	8	Frequent relapse + long latency	Frequent relapse + long latency, Old World	Old World	tropical	Old World, tropical
126_1576	No	NA	360	CQ	Chloroquine	600 mg d0 + 300 mg d1	900 mg	India	Wild - Dehli, India	P14	P14_126	126	1998	Adak et al, 1998	Outpatients	28.6376	77.2235	8	Frequent relapse + long latency	Frequent relapse + long latency, Old World	Old World	tropical	Old World, tropical
126_1577	No	NA	360	CQ	Chloroquine	600 mg d0 + 300 mg d1	900 mg	India	Wild - Dehli, India	P14	P14_126	126	1998	Adak et al, 1998	Outpatients	28.6376	77.2235	8	Frequent relapse + long latency	Frequent relapse + long latency, Old World	Old World	tropical	Old World, tropical
126_1578	No	NA	360	CQ	Chloroquine	600 mg d0 + 300 mg d1	900 mg	India	Wild - Dehli, India	P14	P14_126	126	1998	Adak et al, 1998	Outpatients	28.6376	77.2235	8	Frequent relapse + long latency	Frequent relapse + long latency, Old World	Old World	tropical	Old World, tropical
126_1579	No	NA	360	CQ	Chloroquine	600 mg d0 + 300 mg d1	900 mg	India	Wild - Dehli, India	P14	P14_126	126	1998	Adak et al, 1998	Outpatients	28.6376	77.2235	8	Frequent relapse + long latency	Frequent relapse + long latency, Old World	Old World	tropical	Old World, tropical
126_158	Yes	60	60	CQ	Chloroquine	600 mg d0 + 300 mg d1	900 mg	India	Wild - Dehli, India	P14	P14_126	126	1998	Adak et al, 1998	Outpatients	28.6376	77.2235	8	Frequent relapse + long latency	Frequent relapse + long latency, Old World	Old World	tropical	Old World, tropical
126_1580	No	NA	360	CQ	Chloroquine	600 mg d0 + 300 mg d1	900 mg	India	Wild - Dehli, India	P14	P14_126	126	1998	Adak et al, 1998	Outpatients	28.6376	77.2235	8	Frequent relapse + long latency	Frequent relapse + long latency, Old World	Old World	tropical	Old World, tropical
126_1581	No	NA	360	CQ	Chloroquine	600 mg d0 + 300 mg d1	900 mg	India	Wild - Dehli, India	P14	P14_126	126	1998	Adak et al, 1998	Outpatients	28.6376	77.2235	8	Frequent relapse + long latency	Frequent relapse + long latency, Old World	Old World	tropical	Old World, tropical
126_1582	No	NA	360	CQ	Chloroquine	600 mg d0 + 300 mg d1	900 mg	India	Wild - Dehli, India	P14	P14_126	126	1998	Adak et al, 1998	Outpatients	28.6376	77.2235	8	Frequent relapse + long latency	Frequent relapse + long latency, Old World	Old World	tropical	Old World, tropical
126_1583	No	NA	360	CQ	Chloroquine	600 mg d0 + 300 mg d1	900 mg	India	Wild - Dehli, India	P14	P14_126	126	1998	Adak et al, 1998	Outpatients	28.6376	77.2235	8	Frequent relapse + long latency	Frequent relapse + long latency, Old World	Old World	tropical	Old World, tropical
126_1584	No	NA	360	CQ	Chloroquine	600 mg d0 + 300 mg d1	900 mg	India	Wild - Dehli, India	P14	P14_126	126	1998	Adak et al, 1998	Outpatients	28.6376	77.2235	8	Frequent relapse + long latency	Frequent relapse + long latency, Old World	Old World	tropical	Old World, tropical
126_1585	No	NA	360	CQ	Chloroquine	600 mg d0 + 300 mg d1	900 mg	India	Wild - Dehli, India	P14	P14_126	126	1998	Adak et al, 1998	Outpatients	28.6376	77.2235	8	Frequent relapse + long latency	Frequent relapse + long latency, Old World	Old World	tropical	Old World, tropical
126_1586	No	NA	360	CQ	Chloroquine	600 mg d0 + 300 mg d1	900 mg	India	Wild - Dehli, India	P14	P14_126	126	1998	Adak et al, 1998	Outpatients	28.6376	77.2235	8	Frequent relapse + long latency	Frequent relapse + long latency, Old World	Old World	tropical	Old World, tropical
126_1587	No	NA	360	CQ	Chloroquine	600 mg d0 + 300 mg d1	900 mg	India	Wild - Dehli, India	P14	P14_126	126	1998	Adak et al, 1998	Outpatients	28.6376	77.2235	8	Frequent relapse + long latency	Frequent relapse + long latency, Old World	Old World	tropical	Old World, tropical
126_1588	No	NA	360	CQ	Chloroquine	600 mg d0 + 300 mg d1	900 mg	India	Wild - Dehli, India	P14	P14_126	126	1998	Adak et al, 1998	Outpatients	28.6376	77.2235	8	Frequent relapse + long latency	Frequent relapse + long latency, Old World	Old World	tropical	Old World, tropical
126_1589	No	NA	360	CQ	Chloroquine	600 mg d0 + 300 mg d1	900 mg	India	Wild - Dehli, India	P14	P14_126	126	1998	Adak et al, 1998	Outpatients	28.6376	77.2235	8	Frequent relapse + long latency	Frequent relapse + long latency, Old World	Old World	tropical	Old World, tropical
126_159	Yes	60	60	CQ	Chloroquine	600 mg d0 + 300 mg d1	900 mg	India	Wild - Dehli, India	P14	P14_126	126	1998	Adak et al, 1998	Outpatients	28.6376	77.2235	8	Frequent relapse + long latency	Frequent relapse + long latency, Old World	Old World	tropical	Old World, tropical
126_1590	No	NA	360	CQ	Chloroquine	600 mg d0 + 300 mg d1	900 mg	India	Wild - Dehli, India	P14	P14_126	126	1998	Adak et al, 1998	Outpatients	28.6376	77.2235	8	Frequent relapse + long latency	Frequent relapse + long latency, Old World	Old World	tropical	Old World, tropical
126_1591	No	NA	360	CQ	Chloroquine	600 mg d0 + 300 mg d1	900 mg	India	Wild - Dehli, India	P14	P14_126	126	1998	Adak et al, 1998	Outpatients	28.6376	77.2235	8	Frequent relapse + long latency	Frequent relapse + long latency, Old World	Old World	tropical	Old World, tropical
126_1592	No	NA	360	CQ	Chloroquine	600 mg d0 + 300 mg d1	900 mg	India	Wild - Dehli, India	P14	P14_126	126	1998	Adak et al, 1998	Outpatients	28.6376	77.2235	8	Frequent relapse + long latency	Frequent relapse + long latency, Old World	Old World	tropical	Old World, tropical
126_1593	No	NA	360	CQ	Chloroquine	600 mg d0 + 300 mg d1	900 mg	India	Wild - Dehli, India	P14	P14_126	126	1998	Adak et al, 1998	Outpatients	28.6376	77.2235	8	Frequent relapse + long latency	Frequent relapse + long latency, Old World	Old World	tropical	Old World, tropical
126_1594	No	NA	360	CQ	Chloroquine	600 mg d0 + 300 mg d1	900 mg	India	Wild - Dehli, India	P14	P14_126	126	1998	Adak et al, 1998	Outpatients	28.6376	77.2235	8	Frequent relapse + long latency	Frequent relapse + long latency, Old World	Old World	tropical	Old World, tropical
126_1595	No	NA	360	CQ	Chloroquine	600 mg d0 + 300 mg d1	900 mg	India	Wild - Dehli, India	P14	P14_126	126	1998	Adak et al, 1998	Outpatients	28.6376	77.2235	8	Frequent relapse + long latency	Frequent relapse + long latency, Old World	Old World	tropical	Old World, tropical
126_1596	No	NA	360	CQ	Chloroquine	600 mg d0 + 300 mg d1	900 mg	India	Wild - Dehli, India	P14	P14_126	126	1998	Adak et al, 1998	Outpatients	28.6376	77.2235	8	Frequent relapse + long latency	Frequent relapse + long latency, Old World	Old World	tropical	Old World, tropical
126_1597	No	NA	360	CQ	Chloroquine	600 mg d0 + 300 mg d1	900 mg	India	Wild - Dehli, India	P14	P14_126	126	1998	Adak et al, 1998	Outpatients	28.6376	77.2235	8	Frequent relapse + long latency	Frequent relapse + long latency, Old World	Old World	tropical	Old World, tropical
126_1598	No	NA	360	CQ	Chloroquine	600 mg d0 + 300 mg d1	900 mg	India	Wild - Dehli, India	P14	P14_126	126	1998	Adak et al, 1998	Outpatients	28.6376	77.2235	8	Frequent relapse + long latency	Frequent relapse + long latency, Old World	Old World	tropical	Old World, tropical
126_1599	No	NA	360	CQ	Chloroquine	600 mg d0 + 300 mg d1	900 mg	India	Wild - Dehli, India	P14	P14_126	126	1998	Adak et al, 1998	Outpatients	28.6376	77.2235	8	Frequent relapse + long latency	Frequent relapse + long latency, Old World	Old World	tropical	Old World, tropical
126_16	Yes	30	30	CQ	Chloroquine	600 mg d0 + 300 mg d1	900 mg	India	Wild - Dehli, India	P14	P14_126	126	1998	Adak et al, 1998	Outpatients	28.6376	77.2235	8	Frequent relapse + long latency	Frequent relapse + long latency, Old World	Old World	tropical	Old World, tropical
126_160	Yes	60	60	CQ	Chloroquine	600 mg d0 + 300 mg d1	900 mg	India	Wild - Dehli, India	P14	P14_126	126	1998	Adak et al, 1998	Outpatients	28.6376	77.2235	8	Frequent relapse + long latency	Frequent relapse + long latency, Old World	Old World	tropical	Old World, tropical
126_1600	No	NA	360	CQ	Chloroquine	600 mg d0 + 300 mg d1	900 mg	India	Wild - Dehli, India	P14	P14_126	126	1998	Adak et al, 1998	Outpatients	28.6376	77.2235	8	Frequent relapse + long latency	Frequent relapse + long latency, Old World	Old World	tropical	Old World, tropical
126_1601	No	NA	360	CQ	Chloroquine	600 mg d0 + 300 mg d1	900 mg	India	Wild - Dehli, India	P14	P14_126	126	1998	Adak et al, 1998	Outpatients	28.6376	77.2235	8	Frequent relapse + long latency	Frequent relapse + long latency, Old World	Old World	tropical	Old World, tropical
126_1602	No	NA	360	CQ	Chloroquine	600 mg d0 + 300 mg d1	900 mg	India	Wild - Dehli, India	P14	P14_126	126	1998	Adak et al, 1998	Outpatients	28.6376	77.2235	8	Frequent relapse + long latency	Frequent relapse + long latency, Old World	Old World	tropical	Old World, tropical
126_1603	No	NA	360	CQ	Chloroquine	600 mg d0 + 300 mg d1	900 mg	India	Wild - Dehli, India	P14	P14_126	126	1998	Adak et al, 1998	Outpatients	28.6376	77.2235	8	Frequent relapse + long latency	Frequent relapse + long latency, Old World	Old World	tropical	Old World, tropical
126_1604	No	NA	360	CQ	Chloroquine	600 mg d0 + 300 mg d1	900 mg	India	Wild - Dehli, India	P14	P14_126	126	1998	Adak et al, 1998	Outpatients	28.6376	77.2235	8	Frequent relapse + long latency	Frequent relapse + long latency, Old World	Old World	tropical	Old World, tropical
126_1605	No	NA	360	CQ	Chloroquine	600 mg d0 + 300 mg d1	900 mg	India	Wild - Dehli, India	P14	P14_126	126	1998	Adak et al, 1998	Outpatients	28.6376	77.2235	8	Frequent relapse + long latency	Frequent relapse + long latency, Old World	Old World	tropical	Old World, tropical
126_1606	No	NA	360	CQ	Chloroquine	600 mg d0 + 300 mg d1	900 mg	India	Wild - Dehli, India	P14	P14_126	126	1998	Adak et al, 1998	Outpatients	28.6376	77.2235	8	Frequent relapse + long latency	Frequent relapse + long latency, Old World	Old World	tropical	Old World, tropical
126_1607	No	NA	360	CQ	Chloroquine	600 mg d0 + 300 mg d1	900 mg	India	Wild - Dehli, India	P14	P14_126	126	1998	Adak et al, 1998	Outpatients	28.6376	77.2235	8	Frequent relapse + long latency	Frequent relapse + long latency, Old World	Old World	tropical	Old World, tropical
126_1608	No	NA	360	CQ	Chloroquine	600 mg d0 + 300 mg d1	900 mg	India	Wild - Dehli, India	P14	P14_126	126	1998	Adak et al, 1998	Outpatients	28.6376	77.2235	8	Frequent relapse + long latency	Frequent relapse + long latency, Old World	Old World	tropical	Old World, tropical
126_1609	No	NA	360	CQ	Chloroquine	600 mg d0 + 300 mg d1	900 mg	India	Wild - Dehli, India	P14	P14_126	126	1998	Adak et al, 1998	Outpatients	28.6376	77.2235	8	Frequent relapse + long latency	Frequent relapse + long latency, Old World	Old World	tropical	Old World, tropical
126_161	Yes	60	60	CQ	Chloroquine	600 mg d0 + 300 mg d1	900 mg	India	Wild - Dehli, India	P14	P14_126	126	1998	Adak et al, 1998	Outpatients	28.6376	77.2235	8	Frequent relapse + long latency	Frequent relapse + long latency, Old World	Old World	tropical	Old World, tropical
126_1610	No	NA	360	CQ	Chloroquine	600 mg d0 + 300 mg d1	900 mg	India	Wild - Dehli, India	P14	P14_126	126	1998	Adak et al, 1998	Outpatients	28.6376	77.2235	8	Frequent relapse + long latency	Frequent relapse + long latency, Old World	Old World	tropical	Old World, tropical
126_1611	No	NA	360	CQ	Chloroquine	600 mg d0 + 300 mg d1	900 mg	India	Wild - Dehli, India	P14	P14_126	126	1998	Adak et al, 1998	Outpatients	28.6376	77.2235	8	Frequent relapse + long latency	Frequent relapse + long latency, Old World	Old World	tropical	Old World, tropical
126_1612	No	NA	360	CQ	Chloroquine	600 mg d0 + 300 mg d1	900 mg	India	Wild - Dehli, India	P14	P14_126	126	1998	Adak et al, 1998	Outpatients	28.6376	77.2235	8	Frequent relapse + long latency	Frequent relapse + long latency, Old World	Old World	tropical	Old World, tropical
126_1613	No	NA	360	CQ	Chloroquine	600 mg d0 + 300 mg d1	900 mg	India	Wild - Dehli, India	P14	P14_126	126	1998	Adak et al, 1998	Outpatients	28.6376	77.2235	8	Frequent relapse + long latency	Frequent relapse + long latency, Old World	Old World	tropical	Old World, tropical
126_1614	No	NA	360	CQ	Chloroquine	600 mg d0 + 300 mg d1	900 mg	India	Wild - Dehli, India	P14	P14_126	126	1998	Adak et al, 1998	Outpatients	28.6376	77.2235	8	Frequent relapse + long latency	Frequent relapse + long latency, Old World	Old World	tropical	Old World, tropical
126_1615	No	NA	360	CQ	Chloroquine	600 mg d0 + 300 mg d1	900 mg	India	Wild - Dehli, India	P14	P14_126	126	1998	Adak et al, 1998	Outpatients	28.6376	77.2235	8	Frequent relapse + long latency	Frequent relapse + long latency, Old World	Old World	tropical	Old World, tropical
126_1616	No	NA	360	CQ	Chloroquine	600 mg d0 + 300 mg d1	900 mg	India	Wild - Dehli, India	P14	P14_126	126	1998	Adak et al, 1998	Outpatients	28.6376	77.2235	8	Frequent relapse + long latency	Frequent relapse + long latency, Old World	Old World	tropical	Old World, tropical
126_1617	No	NA	360	CQ	Chloroquine	600 mg d0 + 300 mg d1	900 mg	India	Wild - Dehli, India	P14	P14_126	126	1998	Adak et al, 1998	Outpatients	28.6376	77.2235	8	Frequent relapse + long latency	Frequent relapse + long latency, Old World	Old World	tropical	Old World, tropical
126_1618	No	NA	360	CQ	Chloroquine	600 mg d0 + 300 mg d1	900 mg	India	Wild - Dehli, India	P14	P14_126	126	1998	Adak et al, 1998	Outpatients	28.6376	77.2235	8	Frequent relapse + long latency	Frequent relapse + long latency, Old World	Old World	tropical	Old World, tropical
126_1619	No	NA	360	CQ	Chloroquine	600 mg d0 + 300 mg d1	900 mg	India	Wild - Dehli, India	P14	P14_126	126	1998	Adak et al, 1998	Outpatients	28.6376	77.2235	8	Frequent relapse + long latency	Frequent relapse + long latency, Old World	Old World	tropical	Old World, tropical
126_162	Yes	60	60	CQ	Chloroquine	600 mg d0 + 300 mg d1	900 mg	India	Wild - Dehli, India	P14	P14_126	126	1998	Adak et al, 1998	Outpatients	28.6376	77.2235	8	Frequent relapse + long latency	Frequent relapse + long latency, Old World	Old World	tropical	Old World, tropical
126_1620	No	NA	360	CQ	Chloroquine	600 mg d0 + 300 mg d1	900 mg	India	Wild - Dehli, India	P14	P14_126	126	1998	Adak et al, 1998	Outpatients	28.6376	77.2235	8	Frequent relapse + long latency	Frequent relapse + long latency, Old World	Old World	tropical	Old World, tropical
126_1621	No	NA	360	CQ	Chloroquine	600 mg d0 + 300 mg d1	900 mg	India	Wild - Dehli, India	P14	P14_126	126	1998	Adak et al, 1998	Outpatients	28.6376	77.2235	8	Frequent relapse + long latency	Frequent relapse + long latency, Old World	Old World	tropical	Old World, tropical
126_1622	No	NA	360	CQ	Chloroquine	600 mg d0 + 300 mg d1	900 mg	India	Wild - Dehli, India	P14	P14_126	126	1998	Adak et al, 1998	Outpatients	28.6376	77.2235	8	Frequent relapse + long latency	Frequent relapse + long latency, Old World	Old World	tropical	Old World, tropical
126_1623	No	NA	360	CQ	Chloroquine	600 mg d0 + 300 mg d1	900 mg	India	Wild - Dehli, India	P14	P14_126	126	1998	Adak et al, 1998	Outpatients	28.6376	77.2235	8	Frequent relapse + long latency	Frequent relapse + long latency, Old World	Old World	tropical	Old World, tropical
126_1624	No	NA	360	CQ	Chloroquine	600 mg d0 + 300 mg d1	900 mg	India	Wild - Dehli, India	P14	P14_126	126	1998	Adak et al, 1998	Outpatients	28.6376	77.2235	8	Frequent relapse + long latency	Frequent relapse + long latency, Old World	Old World	tropical	Old World, tropical
126_1625	No	NA	360	CQ	Chloroquine	600 mg d0 + 300 mg d1	900 mg	India	Wild - Dehli, India	P14	P14_126	126	1998	Adak et al, 1998	Outpatients	28.6376	77.2235	8	Frequent relapse + long latency	Frequent relapse + long latency, Old World	Old World	tropical	Old World, tropical
126_1626	No	NA	360	CQ	Chloroquine	600 mg d0 + 300 mg d1	900 mg	India	Wild - Dehli, India	P14	P14_126	126	1998	Adak et al, 1998	Outpatients	28.6376	77.2235	8	Frequent relapse + long latency	Frequent relapse + long latency, Old World	Old World	tropical	Old World, tropical
126_1627	No	NA	360	CQ	Chloroquine	600 mg d0 + 300 mg d1	900 mg	India	Wild - Dehli, India	P14	P14_126	126	1998	Adak et al, 1998	Outpatients	28.6376	77.2235	8	Frequent relapse + long latency	Frequent relapse + long latency, Old World	Old World	tropical	Old World, tropical
126_1628	No	NA	360	CQ	Chloroquine	600 mg d0 + 300 mg d1	900 mg	India	Wild - Dehli, India	P14	P14_126	126	1998	Adak et al, 1998	Outpatients	28.6376	77.2235	8	Frequent relapse + long latency	Frequent relapse + long latency, Old World	Old World	tropical	Old World, tropical
126_1629	No	NA	360	CQ	Chloroquine	600 mg d0 + 300 mg d1	900 mg	India	Wild - Dehli, India	P14	P14_126	126	1998	Adak et al, 1998	Outpatients	28.6376	77.2235	8	Frequent relapse + long latency	Frequent relapse + long latency, Old World	Old World	tropical	Old World, tropical
126_163	Yes	60	60	CQ	Chloroquine	600 mg d0 + 300 mg d1	900 mg	India	Wild - Dehli, India	P14	P14_126	126	1998	Adak et al, 1998	Outpatients	28.6376	77.2235	8	Frequent relapse + long latency	Frequent relapse + long latency, Old World	Old World	tropical	Old World, tropical
126_1630	No	NA	360	CQ	Chloroquine	600 mg d0 + 300 mg d1	900 mg	India	Wild - Dehli, India	P14	P14_126	126	1998	Adak et al, 1998	Outpatients	28.6376	77.2235	8	Frequent relapse + long latency	Frequent relapse + long latency, Old World	Old World	tropical	Old World, tropical
126_1631	No	NA	360	CQ	Chloroquine	600 mg d0 + 300 mg d1	900 mg	India	Wild - Dehli, India	P14	P14_126	126	1998	Adak et al, 1998	Outpatients	28.6376	77.2235	8	Frequent relapse + long latency	Frequent relapse + long latency, Old World	Old World	tropical	Old World, tropical
126_1632	No	NA	360	CQ	Chloroquine	600 mg d0 + 300 mg d1	900 mg	India	Wild - Dehli, India	P14	P14_126	126	1998	Adak et al, 1998	Outpatients	28.6376	77.2235	8	Frequent relapse + long latency	Frequent relapse + long latency, Old World	Old World	tropical	Old World, tropical
126_1633	No	NA	360	CQ	Chloroquine	600 mg d0 + 300 mg d1	900 mg	India	Wild - Dehli, India	P14	P14_126	126	1998	Adak et al, 1998	Outpatients	28.6376	77.2235	8	Frequent relapse + long latency	Frequent relapse + long latency, Old World	Old World	tropical	Old World, tropical
126_1634	No	NA	360	CQ	Chloroquine	600 mg d0 + 300 mg d1	900 mg	India	Wild - Dehli, India	P14	P14_126	126	1998	Adak et al, 1998	Outpatients	28.6376	77.2235	8	Frequent relapse + long latency	Frequent relapse + long latency, Old World	Old World	tropical	Old World, tropical
126_1635	No	NA	360	CQ	Chloroquine	600 mg d0 + 300 mg d1	900 mg	India	Wild - Dehli, India	P14	P14_126	126	1998	Adak et al, 1998	Outpatients	28.6376	77.2235	8	Frequent relapse + long latency	Frequent relapse + long latency, Old World	Old World	tropical	Old World, tropical
126_1636	No	NA	360	CQ	Chloroquine	600 mg d0 + 300 mg d1	900 mg	India	Wild - Dehli, India	P14	P14_126	126	1998	Adak et al, 1998	Outpatients	28.6376	77.2235	8	Frequent relapse + long latency	Frequent relapse + long latency, Old World	Old World	tropical	Old World, tropical
126_1637	No	NA	360	CQ	Chloroquine	600 mg d0 + 300 mg d1	900 mg	India	Wild - Dehli, India	P14	P14_126	126	1998	Adak et al, 1998	Outpatients	28.6376	77.2235	8	Frequent relapse + long latency	Frequent relapse + long latency, Old World	Old World	tropical	Old World, tropical
126_1638	No	NA	360	CQ	Chloroquine	600 mg d0 + 300 mg d1	900 mg	India	Wild - Dehli, India	P14	P14_126	126	1998	Adak et al, 1998	Outpatients	28.6376	77.2235	8	Frequent relapse + long latency	Frequent relapse + long latency, Old World	Old World	tropical	Old World, tropical
126_1639	No	NA	360	CQ	Chloroquine	600 mg d0 + 300 mg d1	900 mg	India	Wild - Dehli, India	P14	P14_126	126	1998	Adak et al, 1998	Outpatients	28.6376	77.2235	8	Frequent relapse + long latency	Frequent relapse + long latency, Old World	Old World	tropical	Old World, tropical
126_164	Yes	60	60	CQ	Chloroquine	600 mg d0 + 300 mg d1	900 mg	India	Wild - Dehli, India	P14	P14_126	126	1998	Adak et al, 1998	Outpatients	28.6376	77.2235	8	Frequent relapse + long latency	Frequent relapse + long latency, Old World	Old World	tropical	Old World, tropical
126_1640	No	NA	360	CQ	Chloroquine	600 mg d0 + 300 mg d1	900 mg	India	Wild - Dehli, India	P14	P14_126	126	1998	Adak et al, 1998	Outpatients	28.6376	77.2235	8	Frequent relapse + long latency	Frequent relapse + long latency, Old World	Old World	tropical	Old World, tropical
126_1641	No	NA	360	CQ	Chloroquine	600 mg d0 + 300 mg d1	900 mg	India	Wild - Dehli, India	P14	P14_126	126	1998	Adak et al, 1998	Outpatients	28.6376	77.2235	8	Frequent relapse + long latency	Frequent relapse + long latency, Old World	Old World	tropical	Old World, tropical
126_1642	No	NA	360	CQ	Chloroquine	600 mg d0 + 300 mg d1	900 mg	India	Wild - Dehli, India	P14	P14_126	126	1998	Adak et al, 1998	Outpatients	28.6376	77.2235	8	Frequent relapse + long latency	Frequent relapse + long latency, Old World	Old World	tropical	Old World, tropical
126_1643	No	NA	360	CQ	Chloroquine	600 mg d0 + 300 mg d1	900 mg	India	Wild - Dehli, India	P14	P14_126	126	1998	Adak et al, 1998	Outpatients	28.6376	77.2235	8	Frequent relapse + long latency	Frequent relapse + long latency, Old World	Old World	tropical	Old World, tropical
126_1644	No	NA	360	CQ	Chloroquine	600 mg d0 + 300 mg d1	900 mg	India	Wild - Dehli, India	P14	P14_126	126	1998	Adak et al, 1998	Outpatients	28.6376	77.2235	8	Frequent relapse + long latency	Frequent relapse + long latency, Old World	Old World	tropical	Old World, tropical
126_1645	No	NA	360	CQ	Chloroquine	600 mg d0 + 300 mg d1	900 mg	India	Wild - Dehli, India	P14	P14_126	126	1998	Adak et al, 1998	Outpatients	28.6376	77.2235	8	Frequent relapse + long latency	Frequent relapse + long latency, Old World	Old World	tropical	Old World, tropical
126_1646	No	NA	360	CQ	Chloroquine	600 mg d0 + 300 mg d1	900 mg	India	Wild - Dehli, India	P14	P14_126	126	1998	Adak et al, 1998	Outpatients	28.6376	77.2235	8	Frequent relapse + long latency	Frequent relapse + long latency, Old World	Old World	tropical	Old World, tropical
126_1647	No	NA	360	CQ	Chloroquine	600 mg d0 + 300 mg d1	900 mg	India	Wild - Dehli, India	P14	P14_126	126	1998	Adak et al, 1998	Outpatients	28.6376	77.2235	8	Frequent relapse + long latency	Frequent relapse + long latency, Old World	Old World	tropical	Old World, tropical
126_1648	No	NA	360	CQ	Chloroquine	600 mg d0 + 300 mg d1	900 mg	India	Wild - Dehli, India	P14	P14_126	126	1998	Adak et al, 1998	Outpatients	28.6376	77.2235	8	Frequent relapse + long latency	Frequent relapse + long latency, Old World	Old World	tropical	Old World, tropical
126_1649	No	NA	360	CQ	Chloroquine	600 mg d0 + 300 mg d1	900 mg	India	Wild - Dehli, India	P14	P14_126	126	1998	Adak et al, 1998	Outpatients	28.6376	77.2235	8	Frequent relapse + long latency	Frequent relapse + long latency, Old World	Old World	tropical	Old World, tropical
126_165	Yes	60	60	CQ	Chloroquine	600 mg d0 + 300 mg d1	900 mg	India	Wild - Dehli, India	P14	P14_126	126	1998	Adak et al, 1998	Outpatients	28.6376	77.2235	8	Frequent relapse + long latency	Frequent relapse + long latency, Old World	Old World	tropical	Old World, tropical
126_1650	No	NA	360	CQ	Chloroquine	600 mg d0 + 300 mg d1	900 mg	India	Wild - Dehli, India	P14	P14_126	126	1998	Adak et al, 1998	Outpatients	28.6376	77.2235	8	Frequent relapse + long latency	Frequent relapse + long latency, Old World	Old World	tropical	Old World, tropical
126_1651	No	NA	360	CQ	Chloroquine	600 mg d0 + 300 mg d1	900 mg	India	Wild - Dehli, India	P14	P14_126	126	1998	Adak et al, 1998	Outpatients	28.6376	77.2235	8	Frequent relapse + long latency	Frequent relapse + long latency, Old World	Old World	tropical	Old World, tropical
126_1652	No	NA	360	CQ	Chloroquine	600 mg d0 + 300 mg d1	900 mg	India	Wild - Dehli, India	P14	P14_126	126	1998	Adak et al, 1998	Outpatients	28.6376	77.2235	8	Frequent relapse + long latency	Frequent relapse + long latency, Old World	Old World	tropical	Old World, tropical
126_1653	No	NA	360	CQ	Chloroquine	600 mg d0 + 300 mg d1	900 mg	India	Wild - Dehli, India	P14	P14_126	126	1998	Adak et al, 1998	Outpatients	28.6376	77.2235	8	Frequent relapse + long latency	Frequent relapse + long latency, Old World	Old World	tropical	Old World, tropical
126_1654	No	NA	360	CQ	Chloroquine	600 mg d0 + 300 mg d1	900 mg	India	Wild - Dehli, India	P14	P14_126	126	1998	Adak et al, 1998	Outpatients	28.6376	77.2235	8	Frequent relapse + long latency	Frequent relapse + long latency, Old World	Old World	tropical	Old World, tropical
126_1655	No	NA	360	CQ	Chloroquine	600 mg d0 + 300 mg d1	900 mg	India	Wild - Dehli, India	P14	P14_126	126	1998	Adak et al, 1998	Outpatients	28.6376	77.2235	8	Frequent relapse + long latency	Frequent relapse + long latency, Old World	Old World	tropical	Old World, tropical
126_1656	No	NA	360	CQ	Chloroquine	600 mg d0 + 300 mg d1	900 mg	India	Wild - Dehli, India	P14	P14_126	126	1998	Adak et al, 1998	Outpatients	28.6376	77.2235	8	Frequent relapse + long latency	Frequent relapse + long latency, Old World	Old World	tropical	Old World, tropical
126_1657	No	NA	360	CQ	Chloroquine	600 mg d0 + 300 mg d1	900 mg	India	Wild - Dehli, India	P14	P14_126	126	1998	Adak et al, 1998	Outpatients	28.6376	77.2235	8	Frequent relapse + long latency	Frequent relapse + long latency, Old World	Old World	tropical	Old World, tropical
126_1658	No	NA	360	CQ	Chloroquine	600 mg d0 + 300 mg d1	900 mg	India	Wild - Dehli, India	P14	P14_126	126	1998	Adak et al, 1998	Outpatients	28.6376	77.2235	8	Frequent relapse + long latency	Frequent relapse + long latency, Old World	Old World	tropical	Old World, tropical
126_1659	No	NA	360	CQ	Chloroquine	600 mg d0 + 300 mg d1	900 mg	India	Wild - Dehli, India	P14	P14_126	126	1998	Adak et al, 1998	Outpatients	28.6376	77.2235	8	Frequent relapse + long latency	Frequent relapse + long latency, Old World	Old World	tropical	Old World, tropical
126_166	Yes	60	60	CQ	Chloroquine	600 mg d0 + 300 mg d1	900 mg	India	Wild - Dehli, India	P14	P14_126	126	1998	Adak et al, 1998	Outpatients	28.6376	77.2235	8	Frequent relapse + long latency	Frequent relapse + long latency, Old World	Old World	tropical	Old World, tropical
126_1660	No	NA	360	CQ	Chloroquine	600 mg d0 + 300 mg d1	900 mg	India	Wild - Dehli, India	P14	P14_126	126	1998	Adak et al, 1998	Outpatients	28.6376	77.2235	8	Frequent relapse + long latency	Frequent relapse + long latency, Old World	Old World	tropical	Old World, tropical
126_1661	No	NA	360	CQ	Chloroquine	600 mg d0 + 300 mg d1	900 mg	India	Wild - Dehli, India	P14	P14_126	126	1998	Adak et al, 1998	Outpatients	28.6376	77.2235	8	Frequent relapse + long latency	Frequent relapse + long latency, Old World	Old World	tropical	Old World, tropical
126_1662	No	NA	360	CQ	Chloroquine	600 mg d0 + 300 mg d1	900 mg	India	Wild - Dehli, India	P14	P14_126	126	1998	Adak et al, 1998	Outpatients	28.6376	77.2235	8	Frequent relapse + long latency	Frequent relapse + long latency, Old World	Old World	tropical	Old World, tropical
126_1663	No	NA	360	CQ	Chloroquine	600 mg d0 + 300 mg d1	900 mg	India	Wild - Dehli, India	P14	P14_126	126	1998	Adak et al, 1998	Outpatients	28.6376	77.2235	8	Frequent relapse + long latency	Frequent relapse + long latency, Old World	Old World	tropical	Old World, tropical
126_1664	No	NA	360	CQ	Chloroquine	600 mg d0 + 300 mg d1	900 mg	India	Wild - Dehli, India	P14	P14_126	126	1998	Adak et al, 1998	Outpatients	28.6376	77.2235	8	Frequent relapse + long latency	Frequent relapse + long latency, Old World	Old World	tropical	Old World, tropical
126_1665	No	NA	360	CQ	Chloroquine	600 mg d0 + 300 mg d1	900 mg	India	Wild - Dehli, India	P14	P14_126	126	1998	Adak et al, 1998	Outpatients	28.6376	77.2235	8	Frequent relapse + long latency	Frequent relapse + long latency, Old World	Old World	tropical	Old World, tropical
126_1666	No	NA	360	CQ	Chloroquine	600 mg d0 + 300 mg d1	900 mg	India	Wild - Dehli, India	P14	P14_126	126	1998	Adak et al, 1998	Outpatients	28.6376	77.2235	8	Frequent relapse + long latency	Frequent relapse + long latency, Old World	Old World	tropical	Old World, tropical
126_1667	No	NA	360	CQ	Chloroquine	600 mg d0 + 300 mg d1	900 mg	India	Wild - Dehli, India	P14	P14_126	126	1998	Adak et al, 1998	Outpatients	28.6376	77.2235	8	Frequent relapse + long latency	Frequent relapse + long latency, Old World	Old World	tropical	Old World, tropical
126_1668	No	NA	360	CQ	Chloroquine	600 mg d0 + 300 mg d1	900 mg	India	Wild - Dehli, India	P14	P14_126	126	1998	Adak et al, 1998	Outpatients	28.6376	77.2235	8	Frequent relapse + long latency	Frequent relapse + long latency, Old World	Old World	tropical	Old World, tropical
126_1669	No	NA	360	CQ	Chloroquine	600 mg d0 + 300 mg d1	900 mg	India	Wild - Dehli, India	P14	P14_126	126	1998	Adak et al, 1998	Outpatients	28.6376	77.2235	8	Frequent relapse + long latency	Frequent relapse + long latency, Old World	Old World	tropical	Old World, tropical
126_167	Yes	60	60	CQ	Chloroquine	600 mg d0 + 300 mg d1	900 mg	India	Wild - Dehli, India	P14	P14_126	126	1998	Adak et al, 1998	Outpatients	28.6376	77.2235	8	Frequent relapse + long latency	Frequent relapse + long latency, Old World	Old World	tropical	Old World, tropical
126_1670	No	NA	360	CQ	Chloroquine	600 mg d0 + 300 mg d1	900 mg	India	Wild - Dehli, India	P14	P14_126	126	1998	Adak et al, 1998	Outpatients	28.6376	77.2235	8	Frequent relapse + long latency	Frequent relapse + long latency, Old World	Old World	tropical	Old World, tropical
126_1671	No	NA	360	CQ	Chloroquine	600 mg d0 + 300 mg d1	900 mg	India	Wild - Dehli, India	P14	P14_126	126	1998	Adak et al, 1998	Outpatients	28.6376	77.2235	8	Frequent relapse + long latency	Frequent relapse + long latency, Old World	Old World	tropical	Old World, tropical
126_1672	No	NA	360	CQ	Chloroquine	600 mg d0 + 300 mg d1	900 mg	India	Wild - Dehli, India	P14	P14_126	126	1998	Adak et al, 1998	Outpatients	28.6376	77.2235	8	Frequent relapse + long latency	Frequent relapse + long latency, Old World	Old World	tropical	Old World, tropical
126_1673	No	NA	360	CQ	Chloroquine	600 mg d0 + 300 mg d1	900 mg	India	Wild - Dehli, India	P14	P14_126	126	1998	Adak et al, 1998	Outpatients	28.6376	77.2235	8	Frequent relapse + long latency	Frequent relapse + long latency, Old World	Old World	tropical	Old World, tropical
126_1674	No	NA	360	CQ	Chloroquine	600 mg d0 + 300 mg d1	900 mg	India	Wild - Dehli, India	P14	P14_126	126	1998	Adak et al, 1998	Outpatients	28.6376	77.2235	8	Frequent relapse + long latency	Frequent relapse + long latency, Old World	Old World	tropical	Old World, tropical
126_1675	No	NA	360	CQ	Chloroquine	600 mg d0 + 300 mg d1	900 mg	India	Wild - Dehli, India	P14	P14_126	126	1998	Adak et al, 1998	Outpatients	28.6376	77.2235	8	Frequent relapse + long latency	Frequent relapse + long latency, Old World	Old World	tropical	Old World, tropical
126_1676	No	NA	360	CQ	Chloroquine	600 mg d0 + 300 mg d1	900 mg	India	Wild - Dehli, India	P14	P14_126	126	1998	Adak et al, 1998	Outpatients	28.6376	77.2235	8	Frequent relapse + long latency	Frequent relapse + long latency, Old World	Old World	tropical	Old World, tropical
126_1677	No	NA	360	CQ	Chloroquine	600 mg d0 + 300 mg d1	900 mg	India	Wild - Dehli, India	P14	P14_126	126	1998	Adak et al, 1998	Outpatients	28.6376	77.2235	8	Frequent relapse + long latency	Frequent relapse + long latency, Old World	Old World	tropical	Old World, tropical
126_1678	No	NA	360	CQ	Chloroquine	600 mg d0 + 300 mg d1	900 mg	India	Wild - Dehli, India	P14	P14_126	126	1998	Adak et al, 1998	Outpatients	28.6376	77.2235	8	Frequent relapse + long latency	Frequent relapse + long latency, Old World	Old World	tropical	Old World, tropical
126_1679	No	NA	360	CQ	Chloroquine	600 mg d0 + 300 mg d1	900 mg	India	Wild - Dehli, India	P14	P14_126	126	1998	Adak et al, 1998	Outpatients	28.6376	77.2235	8	Frequent relapse + long latency	Frequent relapse + long latency, Old World	Old World	tropical	Old World, tropical
126_168	Yes	60	60	CQ	Chloroquine	600 mg d0 + 300 mg d1	900 mg	India	Wild - Dehli, India	P14	P14_126	126	1998	Adak et al, 1998	Outpatients	28.6376	77.2235	8	Frequent relapse + long latency	Frequent relapse + long latency, Old World	Old World	tropical	Old World, tropical
126_1680	No	NA	360	CQ	Chloroquine	600 mg d0 + 300 mg d1	900 mg	India	Wild - Dehli, India	P14	P14_126	126	1998	Adak et al, 1998	Outpatients	28.6376	77.2235	8	Frequent relapse + long latency	Frequent relapse + long latency, Old World	Old World	tropical	Old World, tropical
126_1681	No	NA	360	CQ	Chloroquine	600 mg d0 + 300 mg d1	900 mg	India	Wild - Dehli, India	P14	P14_126	126	1998	Adak et al, 1998	Outpatients	28.6376	77.2235	8	Frequent relapse + long latency	Frequent relapse + long latency, Old World	Old World	tropical	Old World, tropical
126_1682	No	NA	360	CQ	Chloroquine	600 mg d0 + 300 mg d1	900 mg	India	Wild - Dehli, India	P14	P14_126	126	1998	Adak et al, 1998	Outpatients	28.6376	77.2235	8	Frequent relapse + long latency	Frequent relapse + long latency, Old World	Old World	tropical	Old World, tropical
126_1683	No	NA	360	CQ	Chloroquine	600 mg d0 + 300 mg d1	900 mg	India	Wild - Dehli, India	P14	P14_126	126	1998	Adak et al, 1998	Outpatients	28.6376	77.2235	8	Frequent relapse + long latency	Frequent relapse + long latency, Old World	Old World	tropical	Old World, tropical
126_1684	No	NA	360	CQ	Chloroquine	600 mg d0 + 300 mg d1	900 mg	India	Wild - Dehli, India	P14	P14_126	126	1998	Adak et al, 1998	Outpatients	28.6376	77.2235	8	Frequent relapse + long latency	Frequent relapse + long latency, Old World	Old World	tropical	Old World, tropical
126_1685	No	NA	360	CQ	Chloroquine	600 mg d0 + 300 mg d1	900 mg	India	Wild - Dehli, India	P14	P14_126	126	1998	Adak et al, 1998	Outpatients	28.6376	77.2235	8	Frequent relapse + long latency	Frequent relapse + long latency, Old World	Old World	tropical	Old World, tropical
126_1686	No	NA	360	CQ	Chloroquine	600 mg d0 + 300 mg d1	900 mg	India	Wild - Dehli, India	P14	P14_126	126	1998	Adak et al, 1998	Outpatients	28.6376	77.2235	8	Frequent relapse + long latency	Frequent relapse + long latency, Old World	Old World	tropical	Old World, tropical
126_1687	No	NA	360	CQ	Chloroquine	600 mg d0 + 300 mg d1	900 mg	India	Wild - Dehli, India	P14	P14_126	126	1998	Adak et al, 1998	Outpatients	28.6376	77.2235	8	Frequent relapse + long latency	Frequent relapse + long latency, Old World	Old World	tropical	Old World, tropical
126_1688	No	NA	360	CQ	Chloroquine	600 mg d0 + 300 mg d1	900 mg	India	Wild - Dehli, India	P14	P14_126	126	1998	Adak et al, 1998	Outpatients	28.6376	77.2235	8	Frequent relapse + long latency	Frequent relapse + long latency, Old World	Old World	tropical	Old World, tropical
126_1689	No	NA	360	CQ	Chloroquine	600 mg d0 + 300 mg d1	900 mg	India	Wild - Dehli, India	P14	P14_126	126	1998	Adak et al, 1998	Outpatients	28.6376	77.2235	8	Frequent relapse + long latency	Frequent relapse + long latency, Old World	Old World	tropical	Old World, tropical
126_169	Yes	60	60	CQ	Chloroquine	600 mg d0 + 300 mg d1	900 mg	India	Wild - Dehli, India	P14	P14_126	126	1998	Adak et al, 1998	Outpatients	28.6376	77.2235	8	Frequent relapse + long latency	Frequent relapse + long latency, Old World	Old World	tropical	Old World, tropical
126_1690	No	NA	360	CQ	Chloroquine	600 mg d0 + 300 mg d1	900 mg	India	Wild - Dehli, India	P14	P14_126	126	1998	Adak et al, 1998	Outpatients	28.6376	77.2235	8	Frequent relapse + long latency	Frequent relapse + long latency, Old World	Old World	tropical	Old World, tropical
126_1691	No	NA	360	CQ	Chloroquine	600 mg d0 + 300 mg d1	900 mg	India	Wild - Dehli, India	P14	P14_126	126	1998	Adak et al, 1998	Outpatients	28.6376	77.2235	8	Frequent relapse + long latency	Frequent relapse + long latency, Old World	Old World	tropical	Old World, tropical
126_1692	No	NA	360	CQ	Chloroquine	600 mg d0 + 300 mg d1	900 mg	India	Wild - Dehli, India	P14	P14_126	126	1998	Adak et al, 1998	Outpatients	28.6376	77.2235	8	Frequent relapse + long latency	Frequent relapse + long latency, Old World	Old World	tropical	Old World, tropical
126_1693	No	NA	360	CQ	Chloroquine	600 mg d0 + 300 mg d1	900 mg	India	Wild - Dehli, India	P14	P14_126	126	1998	Adak et al, 1998	Outpatients	28.6376	77.2235	8	Frequent relapse + long latency	Frequent relapse + long latency, Old World	Old World	tropical	Old World, tropical
126_1694	No	NA	360	CQ	Chloroquine	600 mg d0 + 300 mg d1	900 mg	India	Wild - Dehli, India	P14	P14_126	126	1998	Adak et al, 1998	Outpatients	28.6376	77.2235	8	Frequent relapse + long latency	Frequent relapse + long latency, Old World	Old World	tropical	Old World, tropical
126_1695	No	NA	360	CQ	Chloroquine	600 mg d0 + 300 mg d1	900 mg	India	Wild - Dehli, India	P14	P14_126	126	1998	Adak et al, 1998	Outpatients	28.6376	77.2235	8	Frequent relapse + long latency	Frequent relapse + long latency, Old World	Old World	tropical	Old World, tropical
126_1696	No	NA	360	CQ	Chloroquine	600 mg d0 + 300 mg d1	900 mg	India	Wild - Dehli, India	P14	P14_126	126	1998	Adak et al, 1998	Outpatients	28.6376	77.2235	8	Frequent relapse + long latency	Frequent relapse + long latency, Old World	Old World	tropical	Old World, tropical
126_1697	No	NA	360	CQ	Chloroquine	600 mg d0 + 300 mg d1	900 mg	India	Wild - Dehli, India	P14	P14_126	126	1998	Adak et al, 1998	Outpatients	28.6376	77.2235	8	Frequent relapse + long latency	Frequent relapse + long latency, Old World	Old World	tropical	Old World, tropical
126_1698	No	NA	360	CQ	Chloroquine	600 mg d0 + 300 mg d1	900 mg	India	Wild - Dehli, India	P14	P14_126	126	1998	Adak et al, 1998	Outpatients	28.6376	77.2235	8	Frequent relapse + long latency	Frequent relapse + long latency, Old World	Old World	tropical	Old World, tropical
126_1699	No	NA	360	CQ	Chloroquine	600 mg d0 + 300 mg d1	900 mg	India	Wild - Dehli, India	P14	P14_126	126	1998	Adak et al, 1998	Outpatients	28.6376	77.2235	8	Frequent relapse + long latency	Frequent relapse + long latency, Old World	Old World	tropical	Old World, tropical
126_17	Yes	30	30	CQ	Chloroquine	600 mg d0 + 300 mg d1	900 mg	India	Wild - Dehli, India	P14	P14_126	126	1998	Adak et al, 1998	Outpatients	28.6376	77.2235	8	Frequent relapse + long latency	Frequent relapse + long latency, Old World	Old World	tropical	Old World, tropical
126_170	Yes	60	60	CQ	Chloroquine	600 mg d0 + 300 mg d1	900 mg	India	Wild - Dehli, India	P14	P14_126	126	1998	Adak et al, 1998	Outpatients	28.6376	77.2235	8	Frequent relapse + long latency	Frequent relapse + long latency, Old World	Old World	tropical	Old World, tropical
126_1700	No	NA	360	CQ	Chloroquine	600 mg d0 + 300 mg d1	900 mg	India	Wild - Dehli, India	P14	P14_126	126	1998	Adak et al, 1998	Outpatients	28.6376	77.2235	8	Frequent relapse + long latency	Frequent relapse + long latency, Old World	Old World	tropical	Old World, tropical
126_1701	No	NA	360	CQ	Chloroquine	600 mg d0 + 300 mg d1	900 mg	India	Wild - Dehli, India	P14	P14_126	126	1998	Adak et al, 1998	Outpatients	28.6376	77.2235	8	Frequent relapse + long latency	Frequent relapse + long latency, Old World	Old World	tropical	Old World, tropical
126_1702	No	NA	360	CQ	Chloroquine	600 mg d0 + 300 mg d1	900 mg	India	Wild - Dehli, India	P14	P14_126	126	1998	Adak et al, 1998	Outpatients	28.6376	77.2235	8	Frequent relapse + long latency	Frequent relapse + long latency, Old World	Old World	tropical	Old World, tropical
126_1703	No	NA	360	CQ	Chloroquine	600 mg d0 + 300 mg d1	900 mg	India	Wild - Dehli, India	P14	P14_126	126	1998	Adak et al, 1998	Outpatients	28.6376	77.2235	8	Frequent relapse + long latency	Frequent relapse + long latency, Old World	Old World	tropical	Old World, tropical
126_1704	No	NA	360	CQ	Chloroquine	600 mg d0 + 300 mg d1	900 mg	India	Wild - Dehli, India	P14	P14_126	126	1998	Adak et al, 1998	Outpatients	28.6376	77.2235	8	Frequent relapse + long latency	Frequent relapse + long latency, Old World	Old World	tropical	Old World, tropical
126_1705	No	NA	360	CQ	Chloroquine	600 mg d0 + 300 mg d1	900 mg	India	Wild - Dehli, India	P14	P14_126	126	1998	Adak et al, 1998	Outpatients	28.6376	77.2235	8	Frequent relapse + long latency	Frequent relapse + long latency, Old World	Old World	tropical	Old World, tropical
126_1706	No	NA	360	CQ	Chloroquine	600 mg d0 + 300 mg d1	900 mg	India	Wild - Dehli, India	P14	P14_126	126	1998	Adak et al, 1998	Outpatients	28.6376	77.2235	8	Frequent relapse + long latency	Frequent relapse + long latency, Old World	Old World	tropical	Old World, tropical
126_1707	No	NA	360	CQ	Chloroquine	600 mg d0 + 300 mg d1	900 mg	India	Wild - Dehli, India	P14	P14_126	126	1998	Adak et al, 1998	Outpatients	28.6376	77.2235	8	Frequent relapse + long latency	Frequent relapse + long latency, Old World	Old World	tropical	Old World, tropical
126_1708	No	NA	360	CQ	Chloroquine	600 mg d0 + 300 mg d1	900 mg	India	Wild - Dehli, India	P14	P14_126	126	1998	Adak et al, 1998	Outpatients	28.6376	77.2235	8	Frequent relapse + long latency	Frequent relapse + long latency, Old World	Old World	tropical	Old World, tropical
126_1709	No	NA	360	CQ	Chloroquine	600 mg d0 + 300 mg d1	900 mg	India	Wild - Dehli, India	P14	P14_126	126	1998	Adak et al, 1998	Outpatients	28.6376	77.2235	8	Frequent relapse + long latency	Frequent relapse + long latency, Old World	Old World	tropical	Old World, tropical
126_171	Yes	60	60	CQ	Chloroquine	600 mg d0 + 300 mg d1	900 mg	India	Wild - Dehli, India	P14	P14_126	126	1998	Adak et al, 1998	Outpatients	28.6376	77.2235	8	Frequent relapse + long latency	Frequent relapse + long latency, Old World	Old World	tropical	Old World, tropical
126_1710	No	NA	360	CQ	Chloroquine	600 mg d0 + 300 mg d1	900 mg	India	Wild - Dehli, India	P14	P14_126	126	1998	Adak et al, 1998	Outpatients	28.6376	77.2235	8	Frequent relapse + long latency	Frequent relapse + long latency, Old World	Old World	tropical	Old World, tropical
126_1711	No	NA	360	CQ	Chloroquine	600 mg d0 + 300 mg d1	900 mg	India	Wild - Dehli, India	P14	P14_126	126	1998	Adak et al, 1998	Outpatients	28.6376	77.2235	8	Frequent relapse + long latency	Frequent relapse + long latency, Old World	Old World	tropical	Old World, tropical
126_1712	No	NA	360	CQ	Chloroquine	600 mg d0 + 300 mg d1	900 mg	India	Wild - Dehli, India	P14	P14_126	126	1998	Adak et al, 1998	Outpatients	28.6376	77.2235	8	Frequent relapse + long latency	Frequent relapse + long latency, Old World	Old World	tropical	Old World, tropical
126_1713	No	NA	360	CQ	Chloroquine	600 mg d0 + 300 mg d1	900 mg	India	Wild - Dehli, India	P14	P14_126	126	1998	Adak et al, 1998	Outpatients	28.6376	77.2235	8	Frequent relapse + long latency	Frequent relapse + long latency, Old World	Old World	tropical	Old World, tropical
126_1714	No	NA	360	CQ	Chloroquine	600 mg d0 + 300 mg d1	900 mg	India	Wild - Dehli, India	P14	P14_126	126	1998	Adak et al, 1998	Outpatients	28.6376	77.2235	8	Frequent relapse + long latency	Frequent relapse + long latency, Old World	Old World	tropical	Old World, tropical
126_1715	No	NA	360	CQ	Chloroquine	600 mg d0 + 300 mg d1	900 mg	India	Wild - Dehli, India	P14	P14_126	126	1998	Adak et al, 1998	Outpatients	28.6376	77.2235	8	Frequent relapse + long latency	Frequent relapse + long latency, Old World	Old World	tropical	Old World, tropical
126_1716	No	NA	360	CQ	Chloroquine	600 mg d0 + 300 mg d1	900 mg	India	Wild - Dehli, India	P14	P14_126	126	1998	Adak et al, 1998	Outpatients	28.6376	77.2235	8	Frequent relapse + long latency	Frequent relapse + long latency, Old World	Old World	tropical	Old World, tropical
126_1717	No	NA	360	CQ	Chloroquine	600 mg d0 + 300 mg d1	900 mg	India	Wild - Dehli, India	P14	P14_126	126	1998	Adak et al, 1998	Outpatients	28.6376	77.2235	8	Frequent relapse + long latency	Frequent relapse + long latency, Old World	Old World	tropical	Old World, tropical
126_1718	No	NA	360	CQ	Chloroquine	600 mg d0 + 300 mg d1	900 mg	India	Wild - Dehli, India	P14	P14_126	126	1998	Adak et al, 1998	Outpatients	28.6376	77.2235	8	Frequent relapse + long latency	Frequent relapse + long latency, Old World	Old World	tropical	Old World, tropical
126_1719	No	NA	360	CQ	Chloroquine	600 mg d0 + 300 mg d1	900 mg	India	Wild - Dehli, India	P14	P14_126	126	1998	Adak et al, 1998	Outpatients	28.6376	77.2235	8	Frequent relapse + long latency	Frequent relapse + long latency, Old World	Old World	tropical	Old World, tropical
126_172	Yes	90	90	CQ	Chloroquine	600 mg d0 + 300 mg d1	900 mg	India	Wild - Dehli, India	P14	P14_126	126	1998	Adak et al, 1998	Outpatients	28.6376	77.2235	8	Frequent relapse + long latency	Frequent relapse + long latency, Old World	Old World	tropical	Old World, tropical
126_1720	No	NA	360	CQ	Chloroquine	600 mg d0 + 300 mg d1	900 mg	India	Wild - Dehli, India	P14	P14_126	126	1998	Adak et al, 1998	Outpatients	28.6376	77.2235	8	Frequent relapse + long latency	Frequent relapse + long latency, Old World	Old World	tropical	Old World, tropical
126_1721	No	NA	360	CQ	Chloroquine	600 mg d0 + 300 mg d1	900 mg	India	Wild - Dehli, India	P14	P14_126	126	1998	Adak et al, 1998	Outpatients	28.6376	77.2235	8	Frequent relapse + long latency	Frequent relapse + long latency, Old World	Old World	tropical	Old World, tropical
126_1722	No	NA	360	CQ	Chloroquine	600 mg d0 + 300 mg d1	900 mg	India	Wild - Dehli, India	P14	P14_126	126	1998	Adak et al, 1998	Outpatients	28.6376	77.2235	8	Frequent relapse + long latency	Frequent relapse + long latency, Old World	Old World	tropical	Old World, tropical
126_1723	No	NA	360	CQ	Chloroquine	600 mg d0 + 300 mg d1	900 mg	India	Wild - Dehli, India	P14	P14_126	126	1998	Adak et al, 1998	Outpatients	28.6376	77.2235	8	Frequent relapse + long latency	Frequent relapse + long latency, Old World	Old World	tropical	Old World, tropical
126_1724	No	NA	360	CQ	Chloroquine	600 mg d0 + 300 mg d1	900 mg	India	Wild - Dehli, India	P14	P14_126	126	1998	Adak et al, 1998	Outpatients	28.6376	77.2235	8	Frequent relapse + long latency	Frequent relapse + long latency, Old World	Old World	tropical	Old World, tropical
126_1725	No	NA	360	CQ	Chloroquine	600 mg d0 + 300 mg d1	900 mg	India	Wild - Dehli, India	P14	P14_126	126	1998	Adak et al, 1998	Outpatients	28.6376	77.2235	8	Frequent relapse + long latency	Frequent relapse + long latency, Old World	Old World	tropical	Old World, tropical
126_1726	No	NA	360	CQ	Chloroquine	600 mg d0 + 300 mg d1	900 mg	India	Wild - Dehli, India	P14	P14_126	126	1998	Adak et al, 1998	Outpatients	28.6376	77.2235	8	Frequent relapse + long latency	Frequent relapse + long latency, Old World	Old World	tropical	Old World, tropical
126_1727	No	NA	360	CQ	Chloroquine	600 mg d0 + 300 mg d1	900 mg	India	Wild - Dehli, India	P14	P14_126	126	1998	Adak et al, 1998	Outpatients	28.6376	77.2235	8	Frequent relapse + long latency	Frequent relapse + long latency, Old World	Old World	tropical	Old World, tropical
126_1728	No	NA	360	CQ	Chloroquine	600 mg d0 + 300 mg d1	900 mg	India	Wild - Dehli, India	P14	P14_126	126	1998	Adak et al, 1998	Outpatients	28.6376	77.2235	8	Frequent relapse + long latency	Frequent relapse + long latency, Old World	Old World	tropical	Old World, tropical
126_1729	No	NA	360	CQ	Chloroquine	600 mg d0 + 300 mg d1	900 mg	India	Wild - Dehli, India	P14	P14_126	126	1998	Adak et al, 1998	Outpatients	28.6376	77.2235	8	Frequent relapse + long latency	Frequent relapse + long latency, Old World	Old World	tropical	Old World, tropical
126_173	Yes	90	90	CQ	Chloroquine	600 mg d0 + 300 mg d1	900 mg	India	Wild - Dehli, India	P14	P14_126	126	1998	Adak et al, 1998	Outpatients	28.6376	77.2235	8	Frequent relapse + long latency	Frequent relapse + long latency, Old World	Old World	tropical	Old World, tropical
126_1730	No	NA	360	CQ	Chloroquine	600 mg d0 + 300 mg d1	900 mg	India	Wild - Dehli, India	P14	P14_126	126	1998	Adak et al, 1998	Outpatients	28.6376	77.2235	8	Frequent relapse + long latency	Frequent relapse + long latency, Old World	Old World	tropical	Old World, tropical
126_1731	No	NA	360	CQ	Chloroquine	600 mg d0 + 300 mg d1	900 mg	India	Wild - Dehli, India	P14	P14_126	126	1998	Adak et al, 1998	Outpatients	28.6376	77.2235	8	Frequent relapse + long latency	Frequent relapse + long latency, Old World	Old World	tropical	Old World, tropical
126_1732	No	NA	360	CQ	Chloroquine	600 mg d0 + 300 mg d1	900 mg	India	Wild - Dehli, India	P14	P14_126	126	1998	Adak et al, 1998	Outpatients	28.6376	77.2235	8	Frequent relapse + long latency	Frequent relapse + long latency, Old World	Old World	tropical	Old World, tropical
126_1733	No	NA	360	CQ	Chloroquine	600 mg d0 + 300 mg d1	900 mg	India	Wild - Dehli, India	P14	P14_126	126	1998	Adak et al, 1998	Outpatients	28.6376	77.2235	8	Frequent relapse + long latency	Frequent relapse + long latency, Old World	Old World	tropical	Old World, tropical
126_1734	No	NA	360	CQ	Chloroquine	600 mg d0 + 300 mg d1	900 mg	India	Wild - Dehli, India	P14	P14_126	126	1998	Adak et al, 1998	Outpatients	28.6376	77.2235	8	Frequent relapse + long latency	Frequent relapse + long latency, Old World	Old World	tropical	Old World, tropical
126_1735	No	NA	360	CQ	Chloroquine	600 mg d0 + 300 mg d1	900 mg	India	Wild - Dehli, India	P14	P14_126	126	1998	Adak et al, 1998	Outpatients	28.6376	77.2235	8	Frequent relapse + long latency	Frequent relapse + long latency, Old World	Old World	tropical	Old World, tropical
126_1736	No	NA	360	CQ	Chloroquine	600 mg d0 + 300 mg d1	900 mg	India	Wild - Dehli, India	P14	P14_126	126	1998	Adak et al, 1998	Outpatients	28.6376	77.2235	8	Frequent relapse + long latency	Frequent relapse + long latency, Old World	Old World	tropical	Old World, tropical
126_1737	No	NA	360	CQ	Chloroquine	600 mg d0 + 300 mg d1	900 mg	India	Wild - Dehli, India	P14	P14_126	126	1998	Adak et al, 1998	Outpatients	28.6376	77.2235	8	Frequent relapse + long latency	Frequent relapse + long latency, Old World	Old World	tropical	Old World, tropical
126_1738	No	NA	360	CQ	Chloroquine	600 mg d0 + 300 mg d1	900 mg	India	Wild - Dehli, India	P14	P14_126	126	1998	Adak et al, 1998	Outpatients	28.6376	77.2235	8	Frequent relapse + long latency	Frequent relapse + long latency, Old World	Old World	tropical	Old World, tropical
126_1739	No	NA	360	CQ	Chloroquine	600 mg d0 + 300 mg d1	900 mg	India	Wild - Dehli, India	P14	P14_126	126	1998	Adak et al, 1998	Outpatients	28.6376	77.2235	8	Frequent relapse + long latency	Frequent relapse + long latency, Old World	Old World	tropical	Old World, tropical
126_174	Yes	90	90	CQ	Chloroquine	600 mg d0 + 300 mg d1	900 mg	India	Wild - Dehli, India	P14	P14_126	126	1998	Adak et al, 1998	Outpatients	28.6376	77.2235	8	Frequent relapse + long latency	Frequent relapse + long latency, Old World	Old World	tropical	Old World, tropical
126_1740	No	NA	360	CQ	Chloroquine	600 mg d0 + 300 mg d1	900 mg	India	Wild - Dehli, India	P14	P14_126	126	1998	Adak et al, 1998	Outpatients	28.6376	77.2235	8	Frequent relapse + long latency	Frequent relapse + long latency, Old World	Old World	tropical	Old World, tropical
126_1741	No	NA	360	CQ	Chloroquine	600 mg d0 + 300 mg d1	900 mg	India	Wild - Dehli, India	P14	P14_126	126	1998	Adak et al, 1998	Outpatients	28.6376	77.2235	8	Frequent relapse + long latency	Frequent relapse + long latency, Old World	Old World	tropical	Old World, tropical
126_1742	No	NA	360	CQ	Chloroquine	600 mg d0 + 300 mg d1	900 mg	India	Wild - Dehli, India	P14	P14_126	126	1998	Adak et al, 1998	Outpatients	28.6376	77.2235	8	Frequent relapse + long latency	Frequent relapse + long latency, Old World	Old World	tropical	Old World, tropical
126_1743	No	NA	360	CQ	Chloroquine	600 mg d0 + 300 mg d1	900 mg	India	Wild - Dehli, India	P14	P14_126	126	1998	Adak et al, 1998	Outpatients	28.6376	77.2235	8	Frequent relapse + long latency	Frequent relapse + long latency, Old World	Old World	tropical	Old World, tropical
126_1744	No	NA	360	CQ	Chloroquine	600 mg d0 + 300 mg d1	900 mg	India	Wild - Dehli, India	P14	P14_126	126	1998	Adak et al, 1998	Outpatients	28.6376	77.2235	8	Frequent relapse + long latency	Frequent relapse + long latency, Old World	Old World	tropical	Old World, tropical
126_1745	No	NA	360	CQ	Chloroquine	600 mg d0 + 300 mg d1	900 mg	India	Wild - Dehli, India	P14	P14_126	126	1998	Adak et al, 1998	Outpatients	28.6376	77.2235	8	Frequent relapse + long latency	Frequent relapse + long latency, Old World	Old World	tropical	Old World, tropical
126_1746	No	NA	360	CQ	Chloroquine	600 mg d0 + 300 mg d1	900 mg	India	Wild - Dehli, India	P14	P14_126	126	1998	Adak et al, 1998	Outpatients	28.6376	77.2235	8	Frequent relapse + long latency	Frequent relapse + long latency, Old World	Old World	tropical	Old World, tropical
126_1747	No	NA	360	CQ	Chloroquine	600 mg d0 + 300 mg d1	900 mg	India	Wild - Dehli, India	P14	P14_126	126	1998	Adak et al, 1998	Outpatients	28.6376	77.2235	8	Frequent relapse + long latency	Frequent relapse + long latency, Old World	Old World	tropical	Old World, tropical
126_1748	No	NA	360	CQ	Chloroquine	600 mg d0 + 300 mg d1	900 mg	India	Wild - Dehli, India	P14	P14_126	126	1998	Adak et al, 1998	Outpatients	28.6376	77.2235	8	Frequent relapse + long latency	Frequent relapse + long latency, Old World	Old World	tropical	Old World, tropical
126_1749	No	NA	360	CQ	Chloroquine	600 mg d0 + 300 mg d1	900 mg	India	Wild - Dehli, India	P14	P14_126	126	1998	Adak et al, 1998	Outpatients	28.6376	77.2235	8	Frequent relapse + long latency	Frequent relapse + long latency, Old World	Old World	tropical	Old World, tropical
126_175	Yes	90	90	CQ	Chloroquine	600 mg d0 + 300 mg d1	900 mg	India	Wild - Dehli, India	P14	P14_126	126	1998	Adak et al, 1998	Outpatients	28.6376	77.2235	8	Frequent relapse + long latency	Frequent relapse + long latency, Old World	Old World	tropical	Old World, tropical
126_1750	No	NA	360	CQ	Chloroquine	600 mg d0 + 300 mg d1	900 mg	India	Wild - Dehli, India	P14	P14_126	126	1998	Adak et al, 1998	Outpatients	28.6376	77.2235	8	Frequent relapse + long latency	Frequent relapse + long latency, Old World	Old World	tropical	Old World, tropical
126_1751	No	NA	360	CQ	Chloroquine	600 mg d0 + 300 mg d1	900 mg	India	Wild - Dehli, India	P14	P14_126	126	1998	Adak et al, 1998	Outpatients	28.6376	77.2235	8	Frequent relapse + long latency	Frequent relapse + long latency, Old World	Old World	tropical	Old World, tropical
126_1752	No	NA	360	CQ	Chloroquine	600 mg d0 + 300 mg d1	900 mg	India	Wild - Dehli, India	P14	P14_126	126	1998	Adak et al, 1998	Outpatients	28.6376	77.2235	8	Frequent relapse + long latency	Frequent relapse + long latency, Old World	Old World	tropical	Old World, tropical
126_1753	No	NA	360	CQ	Chloroquine	600 mg d0 + 300 mg d1	900 mg	India	Wild - Dehli, India	P14	P14_126	126	1998	Adak et al, 1998	Outpatients	28.6376	77.2235	8	Frequent relapse + long latency	Frequent relapse + long latency, Old World	Old World	tropical	Old World, tropical
126_1754	No	NA	360	CQ	Chloroquine	600 mg d0 + 300 mg d1	900 mg	India	Wild - Dehli, India	P14	P14_126	126	1998	Adak et al, 1998	Outpatients	28.6376	77.2235	8	Frequent relapse + long latency	Frequent relapse + long latency, Old World	Old World	tropical	Old World, tropical
126_1755	No	NA	360	CQ	Chloroquine	600 mg d0 + 300 mg d1	900 mg	India	Wild - Dehli, India	P14	P14_126	126	1998	Adak et al, 1998	Outpatients	28.6376	77.2235	8	Frequent relapse + long latency	Frequent relapse + long latency, Old World	Old World	tropical	Old World, tropical
126_1756	No	NA	360	CQ	Chloroquine	600 mg d0 + 300 mg d1	900 mg	India	Wild - Dehli, India	P14	P14_126	126	1998	Adak et al, 1998	Outpatients	28.6376	77.2235	8	Frequent relapse + long latency	Frequent relapse + long latency, Old World	Old World	tropical	Old World, tropical
126_1757	No	NA	360	CQ	Chloroquine	600 mg d0 + 300 mg d1	900 mg	India	Wild - Dehli, India	P14	P14_126	126	1998	Adak et al, 1998	Outpatients	28.6376	77.2235	8	Frequent relapse + long latency	Frequent relapse + long latency, Old World	Old World	tropical	Old World, tropical
126_1758	No	NA	360	CQ	Chloroquine	600 mg d0 + 300 mg d1	900 mg	India	Wild - Dehli, India	P14	P14_126	126	1998	Adak et al, 1998	Outpatients	28.6376	77.2235	8	Frequent relapse + long latency	Frequent relapse + long latency, Old World	Old World	tropical	Old World, tropical
126_1759	No	NA	360	CQ	Chloroquine	600 mg d0 + 300 mg d1	900 mg	India	Wild - Dehli, India	P14	P14_126	126	1998	Adak et al, 1998	Outpatients	28.6376	77.2235	8	Frequent relapse + long latency	Frequent relapse + long latency, Old World	Old World	tropical	Old World, tropical
126_176	Yes	90	90	CQ	Chloroquine	600 mg d0 + 300 mg d1	900 mg	India	Wild - Dehli, India	P14	P14_126	126	1998	Adak et al, 1998	Outpatients	28.6376	77.2235	8	Frequent relapse + long latency	Frequent relapse + long latency, Old World	Old World	tropical	Old World, tropical
126_1760	No	NA	360	CQ	Chloroquine	600 mg d0 + 300 mg d1	900 mg	India	Wild - Dehli, India	P14	P14_126	126	1998	Adak et al, 1998	Outpatients	28.6376	77.2235	8	Frequent relapse + long latency	Frequent relapse + long latency, Old World	Old World	tropical	Old World, tropical
126_1761	No	NA	360	CQ	Chloroquine	600 mg d0 + 300 mg d1	900 mg	India	Wild - Dehli, India	P14	P14_126	126	1998	Adak et al, 1998	Outpatients	28.6376	77.2235	8	Frequent relapse + long latency	Frequent relapse + long latency, Old World	Old World	tropical	Old World, tropical
126_1762	No	NA	360	CQ	Chloroquine	600 mg d0 + 300 mg d1	900 mg	India	Wild - Dehli, India	P14	P14_126	126	1998	Adak et al, 1998	Outpatients	28.6376	77.2235	8	Frequent relapse + long latency	Frequent relapse + long latency, Old World	Old World	tropical	Old World, tropical
126_1763	No	NA	360	CQ	Chloroquine	600 mg d0 + 300 mg d1	900 mg	India	Wild - Dehli, India	P14	P14_126	126	1998	Adak et al, 1998	Outpatients	28.6376	77.2235	8	Frequent relapse + long latency	Frequent relapse + long latency, Old World	Old World	tropical	Old World, tropical
126_1764	No	NA	360	CQ	Chloroquine	600 mg d0 + 300 mg d1	900 mg	India	Wild - Dehli, India	P14	P14_126	126	1998	Adak et al, 1998	Outpatients	28.6376	77.2235	8	Frequent relapse + long latency	Frequent relapse + long latency, Old World	Old World	tropical	Old World, tropical
126_1765	No	NA	360	CQ	Chloroquine	600 mg d0 + 300 mg d1	900 mg	India	Wild - Dehli, India	P14	P14_126	126	1998	Adak et al, 1998	Outpatients	28.6376	77.2235	8	Frequent relapse + long latency	Frequent relapse + long latency, Old World	Old World	tropical	Old World, tropical
126_1766	No	NA	360	CQ	Chloroquine	600 mg d0 + 300 mg d1	900 mg	India	Wild - Dehli, India	P14	P14_126	126	1998	Adak et al, 1998	Outpatients	28.6376	77.2235	8	Frequent relapse + long latency	Frequent relapse + long latency, Old World	Old World	tropical	Old World, tropical
126_1767	No	NA	360	CQ	Chloroquine	600 mg d0 + 300 mg d1	900 mg	India	Wild - Dehli, India	P14	P14_126	126	1998	Adak et al, 1998	Outpatients	28.6376	77.2235	8	Frequent relapse + long latency	Frequent relapse + long latency, Old World	Old World	tropical	Old World, tropical
126_1768	No	NA	360	CQ	Chloroquine	600 mg d0 + 300 mg d1	900 mg	India	Wild - Dehli, India	P14	P14_126	126	1998	Adak et al, 1998	Outpatients	28.6376	77.2235	8	Frequent relapse + long latency	Frequent relapse + long latency, Old World	Old World	tropical	Old World, tropical
126_1769	No	NA	360	CQ	Chloroquine	600 mg d0 + 300 mg d1	900 mg	India	Wild - Dehli, India	P14	P14_126	126	1998	Adak et al, 1998	Outpatients	28.6376	77.2235	8	Frequent relapse + long latency	Frequent relapse + long latency, Old World	Old World	tropical	Old World, tropical
126_177	Yes	90	90	CQ	Chloroquine	600 mg d0 + 300 mg d1	900 mg	India	Wild - Dehli, India	P14	P14_126	126	1998	Adak et al, 1998	Outpatients	28.6376	77.2235	8	Frequent relapse + long latency	Frequent relapse + long latency, Old World	Old World	tropical	Old World, tropical
126_1770	No	NA	360	CQ	Chloroquine	600 mg d0 + 300 mg d1	900 mg	India	Wild - Dehli, India	P14	P14_126	126	1998	Adak et al, 1998	Outpatients	28.6376	77.2235	8	Frequent relapse + long latency	Frequent relapse + long latency, Old World	Old World	tropical	Old World, tropical
126_1771	No	NA	360	CQ	Chloroquine	600 mg d0 + 300 mg d1	900 mg	India	Wild - Dehli, India	P14	P14_126	126	1998	Adak et al, 1998	Outpatients	28.6376	77.2235	8	Frequent relapse + long latency	Frequent relapse + long latency, Old World	Old World	tropical	Old World, tropical
126_1772	No	NA	360	CQ	Chloroquine	600 mg d0 + 300 mg d1	900 mg	India	Wild - Dehli, India	P14	P14_126	126	1998	Adak et al, 1998	Outpatients	28.6376	77.2235	8	Frequent relapse + long latency	Frequent relapse + long latency, Old World	Old World	tropical	Old World, tropical
126_1773	No	NA	360	CQ	Chloroquine	600 mg d0 + 300 mg d1	900 mg	India	Wild - Dehli, India	P14	P14_126	126	1998	Adak et al, 1998	Outpatients	28.6376	77.2235	8	Frequent relapse + long latency	Frequent relapse + long latency, Old World	Old World	tropical	Old World, tropical
126_1774	No	NA	360	CQ	Chloroquine	600 mg d0 + 300 mg d1	900 mg	India	Wild - Dehli, India	P14	P14_126	126	1998	Adak et al, 1998	Outpatients	28.6376	77.2235	8	Frequent relapse + long latency	Frequent relapse + long latency, Old World	Old World	tropical	Old World, tropical
126_1775	No	NA	360	CQ	Chloroquine	600 mg d0 + 300 mg d1	900 mg	India	Wild - Dehli, India	P14	P14_126	126	1998	Adak et al, 1998	Outpatients	28.6376	77.2235	8	Frequent relapse + long latency	Frequent relapse + long latency, Old World	Old World	tropical	Old World, tropical
126_1776	No	NA	360	CQ	Chloroquine	600 mg d0 + 300 mg d1	900 mg	India	Wild - Dehli, India	P14	P14_126	126	1998	Adak et al, 1998	Outpatients	28.6376	77.2235	8	Frequent relapse + long latency	Frequent relapse + long latency, Old World	Old World	tropical	Old World, tropical
126_1777	No	NA	360	CQ	Chloroquine	600 mg d0 + 300 mg d1	900 mg	India	Wild - Dehli, India	P14	P14_126	126	1998	Adak et al, 1998	Outpatients	28.6376	77.2235	8	Frequent relapse + long latency	Frequent relapse + long latency, Old World	Old World	tropical	Old World, tropical
126_1778	No	NA	360	CQ	Chloroquine	600 mg d0 + 300 mg d1	900 mg	India	Wild - Dehli, India	P14	P14_126	126	1998	Adak et al, 1998	Outpatients	28.6376	77.2235	8	Frequent relapse + long latency	Frequent relapse + long latency, Old World	Old World	tropical	Old World, tropical
126_1779	No	NA	360	CQ	Chloroquine	600 mg d0 + 300 mg d1	900 mg	India	Wild - Dehli, India	P14	P14_126	126	1998	Adak et al, 1998	Outpatients	28.6376	77.2235	8	Frequent relapse + long latency	Frequent relapse + long latency, Old World	Old World	tropical	Old World, tropical
126_178	Yes	90	90	CQ	Chloroquine	600 mg d0 + 300 mg d1	900 mg	India	Wild - Dehli, India	P14	P14_126	126	1998	Adak et al, 1998	Outpatients	28.6376	77.2235	8	Frequent relapse + long latency	Frequent relapse + long latency, Old World	Old World	tropical	Old World, tropical
126_1780	No	NA	360	CQ	Chloroquine	600 mg d0 + 300 mg d1	900 mg	India	Wild - Dehli, India	P14	P14_126	126	1998	Adak et al, 1998	Outpatients	28.6376	77.2235	8	Frequent relapse + long latency	Frequent relapse + long latency, Old World	Old World	tropical	Old World, tropical
126_1781	No	NA	360	CQ	Chloroquine	600 mg d0 + 300 mg d1	900 mg	India	Wild - Dehli, India	P14	P14_126	126	1998	Adak et al, 1998	Outpatients	28.6376	77.2235	8	Frequent relapse + long latency	Frequent relapse + long latency, Old World	Old World	tropical	Old World, tropical
126_1782	No	NA	360	CQ	Chloroquine	600 mg d0 + 300 mg d1	900 mg	India	Wild - Dehli, India	P14	P14_126	126	1998	Adak et al, 1998	Outpatients	28.6376	77.2235	8	Frequent relapse + long latency	Frequent relapse + long latency, Old World	Old World	tropical	Old World, tropical
126_1783	No	NA	360	CQ	Chloroquine	600 mg d0 + 300 mg d1	900 mg	India	Wild - Dehli, India	P14	P14_126	126	1998	Adak et al, 1998	Outpatients	28.6376	77.2235	8	Frequent relapse + long latency	Frequent relapse + long latency, Old World	Old World	tropical	Old World, tropical
126_1784	No	NA	360	CQ	Chloroquine	600 mg d0 + 300 mg d1	900 mg	India	Wild - Dehli, India	P14	P14_126	126	1998	Adak et al, 1998	Outpatients	28.6376	77.2235	8	Frequent relapse + long latency	Frequent relapse + long latency, Old World	Old World	tropical	Old World, tropical
126_1785	No	NA	360	CQ	Chloroquine	600 mg d0 + 300 mg d1	900 mg	India	Wild - Dehli, India	P14	P14_126	126	1998	Adak et al, 1998	Outpatients	28.6376	77.2235	8	Frequent relapse + long latency	Frequent relapse + long latency, Old World	Old World	tropical	Old World, tropical
126_1786	No	NA	360	CQ	Chloroquine	600 mg d0 + 300 mg d1	900 mg	India	Wild - Dehli, India	P14	P14_126	126	1998	Adak et al, 1998	Outpatients	28.6376	77.2235	8	Frequent relapse + long latency	Frequent relapse + long latency, Old World	Old World	tropical	Old World, tropical
126_1787	No	NA	360	CQ	Chloroquine	600 mg d0 + 300 mg d1	900 mg	India	Wild - Dehli, India	P14	P14_126	126	1998	Adak et al, 1998	Outpatients	28.6376	77.2235	8	Frequent relapse + long latency	Frequent relapse + long latency, Old World	Old World	tropical	Old World, tropical
126_1788	No	NA	360	CQ	Chloroquine	600 mg d0 + 300 mg d1	900 mg	India	Wild - Dehli, India	P14	P14_126	126	1998	Adak et al, 1998	Outpatients	28.6376	77.2235	8	Frequent relapse + long latency	Frequent relapse + long latency, Old World	Old World	tropical	Old World, tropical
126_1789	No	NA	360	CQ	Chloroquine	600 mg d0 + 300 mg d1	900 mg	India	Wild - Dehli, India	P14	P14_126	126	1998	Adak et al, 1998	Outpatients	28.6376	77.2235	8	Frequent relapse + long latency	Frequent relapse + long latency, Old World	Old World	tropical	Old World, tropical
126_179	Yes	90	90	CQ	Chloroquine	600 mg d0 + 300 mg d1	900 mg	India	Wild - Dehli, India	P14	P14_126	126	1998	Adak et al, 1998	Outpatients	28.6376	77.2235	8	Frequent relapse + long latency	Frequent relapse + long latency, Old World	Old World	tropical	Old World, tropical
126_1790	No	NA	360	CQ	Chloroquine	600 mg d0 + 300 mg d1	900 mg	India	Wild - Dehli, India	P14	P14_126	126	1998	Adak et al, 1998	Outpatients	28.6376	77.2235	8	Frequent relapse + long latency	Frequent relapse + long latency, Old World	Old World	tropical	Old World, tropical
126_1791	No	NA	360	CQ	Chloroquine	600 mg d0 + 300 mg d1	900 mg	India	Wild - Dehli, India	P14	P14_126	126	1998	Adak et al, 1998	Outpatients	28.6376	77.2235	8	Frequent relapse + long latency	Frequent relapse + long latency, Old World	Old World	tropical	Old World, tropical
126_1792	No	NA	360	CQ	Chloroquine	600 mg d0 + 300 mg d1	900 mg	India	Wild - Dehli, India	P14	P14_126	126	1998	Adak et al, 1998	Outpatients	28.6376	77.2235	8	Frequent relapse + long latency	Frequent relapse + long latency, Old World	Old World	tropical	Old World, tropical
126_1793	No	NA	360	CQ	Chloroquine	600 mg d0 + 300 mg d1	900 mg	India	Wild - Dehli, India	P14	P14_126	126	1998	Adak et al, 1998	Outpatients	28.6376	77.2235	8	Frequent relapse + long latency	Frequent relapse + long latency, Old World	Old World	tropical	Old World, tropical
126_1794	No	NA	360	CQ	Chloroquine	600 mg d0 + 300 mg d1	900 mg	India	Wild - Dehli, India	P14	P14_126	126	1998	Adak et al, 1998	Outpatients	28.6376	77.2235	8	Frequent relapse + long latency	Frequent relapse + long latency, Old World	Old World	tropical	Old World, tropical
126_1795	No	NA	360	CQ	Chloroquine	600 mg d0 + 300 mg d1	900 mg	India	Wild - Dehli, India	P14	P14_126	126	1998	Adak et al, 1998	Outpatients	28.6376	77.2235	8	Frequent relapse + long latency	Frequent relapse + long latency, Old World	Old World	tropical	Old World, tropical
126_1796	No	NA	360	CQ	Chloroquine	600 mg d0 + 300 mg d1	900 mg	India	Wild - Dehli, India	P14	P14_126	126	1998	Adak et al, 1998	Outpatients	28.6376	77.2235	8	Frequent relapse + long latency	Frequent relapse + long latency, Old World	Old World	tropical	Old World, tropical
126_1797	No	NA	360	CQ	Chloroquine	600 mg d0 + 300 mg d1	900 mg	India	Wild - Dehli, India	P14	P14_126	126	1998	Adak et al, 1998	Outpatients	28.6376	77.2235	8	Frequent relapse + long latency	Frequent relapse + long latency, Old World	Old World	tropical	Old World, tropical
126_1798	No	NA	360	CQ	Chloroquine	600 mg d0 + 300 mg d1	900 mg	India	Wild - Dehli, India	P14	P14_126	126	1998	Adak et al, 1998	Outpatients	28.6376	77.2235	8	Frequent relapse + long latency	Frequent relapse + long latency, Old World	Old World	tropical	Old World, tropical
126_1799	No	NA	360	CQ	Chloroquine	600 mg d0 + 300 mg d1	900 mg	India	Wild - Dehli, India	P14	P14_126	126	1998	Adak et al, 1998	Outpatients	28.6376	77.2235	8	Frequent relapse + long latency	Frequent relapse + long latency, Old World	Old World	tropical	Old World, tropical
126_18	Yes	30	30	CQ	Chloroquine	600 mg d0 + 300 mg d1	900 mg	India	Wild - Dehli, India	P14	P14_126	126	1998	Adak et al, 1998	Outpatients	28.6376	77.2235	8	Frequent relapse + long latency	Frequent relapse + long latency, Old World	Old World	tropical	Old World, tropical
126_180	Yes	90	90	CQ	Chloroquine	600 mg d0 + 300 mg d1	900 mg	India	Wild - Dehli, India	P14	P14_126	126	1998	Adak et al, 1998	Outpatients	28.6376	77.2235	8	Frequent relapse + long latency	Frequent relapse + long latency, Old World	Old World	tropical	Old World, tropical
126_1800	No	NA	360	CQ	Chloroquine	600 mg d0 + 300 mg d1	900 mg	India	Wild - Dehli, India	P14	P14_126	126	1998	Adak et al, 1998	Outpatients	28.6376	77.2235	8	Frequent relapse + long latency	Frequent relapse + long latency, Old World	Old World	tropical	Old World, tropical
126_1801	No	NA	360	CQ	Chloroquine	600 mg d0 + 300 mg d1	900 mg	India	Wild - Dehli, India	P14	P14_126	126	1998	Adak et al, 1998	Outpatients	28.6376	77.2235	8	Frequent relapse + long latency	Frequent relapse + long latency, Old World	Old World	tropical	Old World, tropical
126_1802	No	NA	360	CQ	Chloroquine	600 mg d0 + 300 mg d1	900 mg	India	Wild - Dehli, India	P14	P14_126	126	1998	Adak et al, 1998	Outpatients	28.6376	77.2235	8	Frequent relapse + long latency	Frequent relapse + long latency, Old World	Old World	tropical	Old World, tropical
126_1803	No	NA	360	CQ	Chloroquine	600 mg d0 + 300 mg d1	900 mg	India	Wild - Dehli, India	P14	P14_126	126	1998	Adak et al, 1998	Outpatients	28.6376	77.2235	8	Frequent relapse + long latency	Frequent relapse + long latency, Old World	Old World	tropical	Old World, tropical
126_1804	No	NA	360	CQ	Chloroquine	600 mg d0 + 300 mg d1	900 mg	India	Wild - Dehli, India	P14	P14_126	126	1998	Adak et al, 1998	Outpatients	28.6376	77.2235	8	Frequent relapse + long latency	Frequent relapse + long latency, Old World	Old World	tropical	Old World, tropical
126_1805	No	NA	360	CQ	Chloroquine	600 mg d0 + 300 mg d1	900 mg	India	Wild - Dehli, India	P14	P14_126	126	1998	Adak et al, 1998	Outpatients	28.6376	77.2235	8	Frequent relapse + long latency	Frequent relapse + long latency, Old World	Old World	tropical	Old World, tropical
126_1806	No	NA	360	CQ	Chloroquine	600 mg d0 + 300 mg d1	900 mg	India	Wild - Dehli, India	P14	P14_126	126	1998	Adak et al, 1998	Outpatients	28.6376	77.2235	8	Frequent relapse + long latency	Frequent relapse + long latency, Old World	Old World	tropical	Old World, tropical
126_1807	No	NA	360	CQ	Chloroquine	600 mg d0 + 300 mg d1	900 mg	India	Wild - Dehli, India	P14	P14_126	126	1998	Adak et al, 1998	Outpatients	28.6376	77.2235	8	Frequent relapse + long latency	Frequent relapse + long latency, Old World	Old World	tropical	Old World, tropical
126_1808	No	NA	360	CQ	Chloroquine	600 mg d0 + 300 mg d1	900 mg	India	Wild - Dehli, India	P14	P14_126	126	1998	Adak et al, 1998	Outpatients	28.6376	77.2235	8	Frequent relapse + long latency	Frequent relapse + long latency, Old World	Old World	tropical	Old World, tropical
126_1809	No	NA	360	CQ	Chloroquine	600 mg d0 + 300 mg d1	900 mg	India	Wild - Dehli, India	P14	P14_126	126	1998	Adak et al, 1998	Outpatients	28.6376	77.2235	8	Frequent relapse + long latency	Frequent relapse + long latency, Old World	Old World	tropical	Old World, tropical
126_181	Yes	90	90	CQ	Chloroquine	600 mg d0 + 300 mg d1	900 mg	India	Wild - Dehli, India	P14	P14_126	126	1998	Adak et al, 1998	Outpatients	28.6376	77.2235	8	Frequent relapse + long latency	Frequent relapse + long latency, Old World	Old World	tropical	Old World, tropical
126_1810	No	NA	360	CQ	Chloroquine	600 mg d0 + 300 mg d1	900 mg	India	Wild - Dehli, India	P14	P14_126	126	1998	Adak et al, 1998	Outpatients	28.6376	77.2235	8	Frequent relapse + long latency	Frequent relapse + long latency, Old World	Old World	tropical	Old World, tropical
126_1811	No	NA	360	CQ	Chloroquine	600 mg d0 + 300 mg d1	900 mg	India	Wild - Dehli, India	P14	P14_126	126	1998	Adak et al, 1998	Outpatients	28.6376	77.2235	8	Frequent relapse + long latency	Frequent relapse + long latency, Old World	Old World	tropical	Old World, tropical
126_1812	No	NA	360	CQ	Chloroquine	600 mg d0 + 300 mg d1	900 mg	India	Wild - Dehli, India	P14	P14_126	126	1998	Adak et al, 1998	Outpatients	28.6376	77.2235	8	Frequent relapse + long latency	Frequent relapse + long latency, Old World	Old World	tropical	Old World, tropical
126_1813	No	NA	360	CQ	Chloroquine	600 mg d0 + 300 mg d1	900 mg	India	Wild - Dehli, India	P14	P14_126	126	1998	Adak et al, 1998	Outpatients	28.6376	77.2235	8	Frequent relapse + long latency	Frequent relapse + long latency, Old World	Old World	tropical	Old World, tropical
126_1814	No	NA	360	CQ	Chloroquine	600 mg d0 + 300 mg d1	900 mg	India	Wild - Dehli, India	P14	P14_126	126	1998	Adak et al, 1998	Outpatients	28.6376	77.2235	8	Frequent relapse + long latency	Frequent relapse + long latency, Old World	Old World	tropical	Old World, tropical
126_1815	No	NA	360	CQ	Chloroquine	600 mg d0 + 300 mg d1	900 mg	India	Wild - Dehli, India	P14	P14_126	126	1998	Adak et al, 1998	Outpatients	28.6376	77.2235	8	Frequent relapse + long latency	Frequent relapse + long latency, Old World	Old World	tropical	Old World, tropical
126_1816	No	NA	360	CQ	Chloroquine	600 mg d0 + 300 mg d1	900 mg	India	Wild - Dehli, India	P14	P14_126	126	1998	Adak et al, 1998	Outpatients	28.6376	77.2235	8	Frequent relapse + long latency	Frequent relapse + long latency, Old World	Old World	tropical	Old World, tropical
126_1817	No	NA	360	CQ	Chloroquine	600 mg d0 + 300 mg d1	900 mg	India	Wild - Dehli, India	P14	P14_126	126	1998	Adak et al, 1998	Outpatients	28.6376	77.2235	8	Frequent relapse + long latency	Frequent relapse + long latency, Old World	Old World	tropical	Old World, tropical
126_1818	No	NA	360	CQ	Chloroquine	600 mg d0 + 300 mg d1	900 mg	India	Wild - Dehli, India	P14	P14_126	126	1998	Adak et al, 1998	Outpatients	28.6376	77.2235	8	Frequent relapse + long latency	Frequent relapse + long latency, Old World	Old World	tropical	Old World, tropical
126_1819	No	NA	360	CQ	Chloroquine	600 mg d0 + 300 mg d1	900 mg	India	Wild - Dehli, India	P14	P14_126	126	1998	Adak et al, 1998	Outpatients	28.6376	77.2235	8	Frequent relapse + long latency	Frequent relapse + long latency, Old World	Old World	tropical	Old World, tropical
126_182	Yes	90	90	CQ	Chloroquine	600 mg d0 + 300 mg d1	900 mg	India	Wild - Dehli, India	P14	P14_126	126	1998	Adak et al, 1998	Outpatients	28.6376	77.2235	8	Frequent relapse + long latency	Frequent relapse + long latency, Old World	Old World	tropical	Old World, tropical
126_1820	No	NA	360	CQ	Chloroquine	600 mg d0 + 300 mg d1	900 mg	India	Wild - Dehli, India	P14	P14_126	126	1998	Adak et al, 1998	Outpatients	28.6376	77.2235	8	Frequent relapse + long latency	Frequent relapse + long latency, Old World	Old World	tropical	Old World, tropical
126_1821	No	NA	360	CQ	Chloroquine	600 mg d0 + 300 mg d1	900 mg	India	Wild - Dehli, India	P14	P14_126	126	1998	Adak et al, 1998	Outpatients	28.6376	77.2235	8	Frequent relapse + long latency	Frequent relapse + long latency, Old World	Old World	tropical	Old World, tropical
126_1822	No	NA	360	CQ	Chloroquine	600 mg d0 + 300 mg d1	900 mg	India	Wild - Dehli, India	P14	P14_126	126	1998	Adak et al, 1998	Outpatients	28.6376	77.2235	8	Frequent relapse + long latency	Frequent relapse + long latency, Old World	Old World	tropical	Old World, tropical
126_1823	No	NA	360	CQ	Chloroquine	600 mg d0 + 300 mg d1	900 mg	India	Wild - Dehli, India	P14	P14_126	126	1998	Adak et al, 1998	Outpatients	28.6376	77.2235	8	Frequent relapse + long latency	Frequent relapse + long latency, Old World	Old World	tropical	Old World, tropical
126_1824	No	NA	360	CQ	Chloroquine	600 mg d0 + 300 mg d1	900 mg	India	Wild - Dehli, India	P14	P14_126	126	1998	Adak et al, 1998	Outpatients	28.6376	77.2235	8	Frequent relapse + long latency	Frequent relapse + long latency, Old World	Old World	tropical	Old World, tropical
126_1825	No	NA	360	CQ	Chloroquine	600 mg d0 + 300 mg d1	900 mg	India	Wild - Dehli, India	P14	P14_126	126	1998	Adak et al, 1998	Outpatients	28.6376	77.2235	8	Frequent relapse + long latency	Frequent relapse + long latency, Old World	Old World	tropical	Old World, tropical
126_1826	No	NA	360	CQ	Chloroquine	600 mg d0 + 300 mg d1	900 mg	India	Wild - Dehli, India	P14	P14_126	126	1998	Adak et al, 1998	Outpatients	28.6376	77.2235	8	Frequent relapse + long latency	Frequent relapse + long latency, Old World	Old World	tropical	Old World, tropical
126_1827	No	NA	360	CQ	Chloroquine	600 mg d0 + 300 mg d1	900 mg	India	Wild - Dehli, India	P14	P14_126	126	1998	Adak et al, 1998	Outpatients	28.6376	77.2235	8	Frequent relapse + long latency	Frequent relapse + long latency, Old World	Old World	tropical	Old World, tropical
126_1828	No	NA	360	CQ	Chloroquine	600 mg d0 + 300 mg d1	900 mg	India	Wild - Dehli, India	P14	P14_126	126	1998	Adak et al, 1998	Outpatients	28.6376	77.2235	8	Frequent relapse + long latency	Frequent relapse + long latency, Old World	Old World	tropical	Old World, tropical
126_1829	No	NA	360	CQ	Chloroquine	600 mg d0 + 300 mg d1	900 mg	India	Wild - Dehli, India	P14	P14_126	126	1998	Adak et al, 1998	Outpatients	28.6376	77.2235	8	Frequent relapse + long latency	Frequent relapse + long latency, Old World	Old World	tropical	Old World, tropical
126_183	Yes	90	90	CQ	Chloroquine	600 mg d0 + 300 mg d1	900 mg	India	Wild - Dehli, India	P14	P14_126	126	1998	Adak et al, 1998	Outpatients	28.6376	77.2235	8	Frequent relapse + long latency	Frequent relapse + long latency, Old World	Old World	tropical	Old World, tropical
126_1830	No	NA	360	CQ	Chloroquine	600 mg d0 + 300 mg d1	900 mg	India	Wild - Dehli, India	P14	P14_126	126	1998	Adak et al, 1998	Outpatients	28.6376	77.2235	8	Frequent relapse + long latency	Frequent relapse + long latency, Old World	Old World	tropical	Old World, tropical
126_1831	No	NA	360	CQ	Chloroquine	600 mg d0 + 300 mg d1	900 mg	India	Wild - Dehli, India	P14	P14_126	126	1998	Adak et al, 1998	Outpatients	28.6376	77.2235	8	Frequent relapse + long latency	Frequent relapse + long latency, Old World	Old World	tropical	Old World, tropical
126_1832	No	NA	360	CQ	Chloroquine	600 mg d0 + 300 mg d1	900 mg	India	Wild - Dehli, India	P14	P14_126	126	1998	Adak et al, 1998	Outpatients	28.6376	77.2235	8	Frequent relapse + long latency	Frequent relapse + long latency, Old World	Old World	tropical	Old World, tropical
126_1833	No	NA	360	CQ	Chloroquine	600 mg d0 + 300 mg d1	900 mg	India	Wild - Dehli, India	P14	P14_126	126	1998	Adak et al, 1998	Outpatients	28.6376	77.2235	8	Frequent relapse + long latency	Frequent relapse + long latency, Old World	Old World	tropical	Old World, tropical
126_1834	No	NA	360	CQ	Chloroquine	600 mg d0 + 300 mg d1	900 mg	India	Wild - Dehli, India	P14	P14_126	126	1998	Adak et al, 1998	Outpatients	28.6376	77.2235	8	Frequent relapse + long latency	Frequent relapse + long latency, Old World	Old World	tropical	Old World, tropical
126_1835	No	NA	360	CQ	Chloroquine	600 mg d0 + 300 mg d1	900 mg	India	Wild - Dehli, India	P14	P14_126	126	1998	Adak et al, 1998	Outpatients	28.6376	77.2235	8	Frequent relapse + long latency	Frequent relapse + long latency, Old World	Old World	tropical	Old World, tropical
126_1836	No	NA	360	CQ	Chloroquine	600 mg d0 + 300 mg d1	900 mg	India	Wild - Dehli, India	P14	P14_126	126	1998	Adak et al, 1998	Outpatients	28.6376	77.2235	8	Frequent relapse + long latency	Frequent relapse + long latency, Old World	Old World	tropical	Old World, tropical
126_1837	No	NA	360	CQ	Chloroquine	600 mg d0 + 300 mg d1	900 mg	India	Wild - Dehli, India	P14	P14_126	126	1998	Adak et al, 1998	Outpatients	28.6376	77.2235	8	Frequent relapse + long latency	Frequent relapse + long latency, Old World	Old World	tropical	Old World, tropical
126_1838	No	NA	360	CQ	Chloroquine	600 mg d0 + 300 mg d1	900 mg	India	Wild - Dehli, India	P14	P14_126	126	1998	Adak et al, 1998	Outpatients	28.6376	77.2235	8	Frequent relapse + long latency	Frequent relapse + long latency, Old World	Old World	tropical	Old World, tropical
126_1839	No	NA	360	CQ	Chloroquine	600 mg d0 + 300 mg d1	900 mg	India	Wild - Dehli, India	P14	P14_126	126	1998	Adak et al, 1998	Outpatients	28.6376	77.2235	8	Frequent relapse + long latency	Frequent relapse + long latency, Old World	Old World	tropical	Old World, tropical
126_184	Yes	90	90	CQ	Chloroquine	600 mg d0 + 300 mg d1	900 mg	India	Wild - Dehli, India	P14	P14_126	126	1998	Adak et al, 1998	Outpatients	28.6376	77.2235	8	Frequent relapse + long latency	Frequent relapse + long latency, Old World	Old World	tropical	Old World, tropical
126_1840	No	NA	360	CQ	Chloroquine	600 mg d0 + 300 mg d1	900 mg	India	Wild - Dehli, India	P14	P14_126	126	1998	Adak et al, 1998	Outpatients	28.6376	77.2235	8	Frequent relapse + long latency	Frequent relapse + long latency, Old World	Old World	tropical	Old World, tropical
126_1841	No	NA	360	CQ	Chloroquine	600 mg d0 + 300 mg d1	900 mg	India	Wild - Dehli, India	P14	P14_126	126	1998	Adak et al, 1998	Outpatients	28.6376	77.2235	8	Frequent relapse + long latency	Frequent relapse + long latency, Old World	Old World	tropical	Old World, tropical
126_1842	No	NA	360	CQ	Chloroquine	600 mg d0 + 300 mg d1	900 mg	India	Wild - Dehli, India	P14	P14_126	126	1998	Adak et al, 1998	Outpatients	28.6376	77.2235	8	Frequent relapse + long latency	Frequent relapse + long latency, Old World	Old World	tropical	Old World, tropical
126_1843	No	NA	360	CQ	Chloroquine	600 mg d0 + 300 mg d1	900 mg	India	Wild - Dehli, India	P14	P14_126	126	1998	Adak et al, 1998	Outpatients	28.6376	77.2235	8	Frequent relapse + long latency	Frequent relapse + long latency, Old World	Old World	tropical	Old World, tropical
126_1844	No	NA	360	CQ	Chloroquine	600 mg d0 + 300 mg d1	900 mg	India	Wild - Dehli, India	P14	P14_126	126	1998	Adak et al, 1998	Outpatients	28.6376	77.2235	8	Frequent relapse + long latency	Frequent relapse + long latency, Old World	Old World	tropical	Old World, tropical
126_1845	No	NA	360	CQ	Chloroquine	600 mg d0 + 300 mg d1	900 mg	India	Wild - Dehli, India	P14	P14_126	126	1998	Adak et al, 1998	Outpatients	28.6376	77.2235	8	Frequent relapse + long latency	Frequent relapse + long latency, Old World	Old World	tropical	Old World, tropical
126_1846	No	NA	360	CQ	Chloroquine	600 mg d0 + 300 mg d1	900 mg	India	Wild - Dehli, India	P14	P14_126	126	1998	Adak et al, 1998	Outpatients	28.6376	77.2235	8	Frequent relapse + long latency	Frequent relapse + long latency, Old World	Old World	tropical	Old World, tropical
126_1847	No	NA	360	CQ	Chloroquine	600 mg d0 + 300 mg d1	900 mg	India	Wild - Dehli, India	P14	P14_126	126	1998	Adak et al, 1998	Outpatients	28.6376	77.2235	8	Frequent relapse + long latency	Frequent relapse + long latency, Old World	Old World	tropical	Old World, tropical
126_1848	No	NA	360	CQ	Chloroquine	600 mg d0 + 300 mg d1	900 mg	India	Wild - Dehli, India	P14	P14_126	126	1998	Adak et al, 1998	Outpatients	28.6376	77.2235	8	Frequent relapse + long latency	Frequent relapse + long latency, Old World	Old World	tropical	Old World, tropical
126_1849	No	NA	360	CQ	Chloroquine	600 mg d0 + 300 mg d1	900 mg	India	Wild - Dehli, India	P14	P14_126	126	1998	Adak et al, 1998	Outpatients	28.6376	77.2235	8	Frequent relapse + long latency	Frequent relapse + long latency, Old World	Old World	tropical	Old World, tropical
126_185	Yes	90	90	CQ	Chloroquine	600 mg d0 + 300 mg d1	900 mg	India	Wild - Dehli, India	P14	P14_126	126	1998	Adak et al, 1998	Outpatients	28.6376	77.2235	8	Frequent relapse + long latency	Frequent relapse + long latency, Old World	Old World	tropical	Old World, tropical
126_1850	No	NA	360	CQ	Chloroquine	600 mg d0 + 300 mg d1	900 mg	India	Wild - Dehli, India	P14	P14_126	126	1998	Adak et al, 1998	Outpatients	28.6376	77.2235	8	Frequent relapse + long latency	Frequent relapse + long latency, Old World	Old World	tropical	Old World, tropical
126_1851	No	NA	360	CQ	Chloroquine	600 mg d0 + 300 mg d1	900 mg	India	Wild - Dehli, India	P14	P14_126	126	1998	Adak et al, 1998	Outpatients	28.6376	77.2235	8	Frequent relapse + long latency	Frequent relapse + long latency, Old World	Old World	tropical	Old World, tropical
126_1852	No	NA	360	CQ	Chloroquine	600 mg d0 + 300 mg d1	900 mg	India	Wild - Dehli, India	P14	P14_126	126	1998	Adak et al, 1998	Outpatients	28.6376	77.2235	8	Frequent relapse + long latency	Frequent relapse + long latency, Old World	Old World	tropical	Old World, tropical
126_1853	No	NA	360	CQ	Chloroquine	600 mg d0 + 300 mg d1	900 mg	India	Wild - Dehli, India	P14	P14_126	126	1998	Adak et al, 1998	Outpatients	28.6376	77.2235	8	Frequent relapse + long latency	Frequent relapse + long latency, Old World	Old World	tropical	Old World, tropical
126_1854	No	NA	360	CQ	Chloroquine	600 mg d0 + 300 mg d1	900 mg	India	Wild - Dehli, India	P14	P14_126	126	1998	Adak et al, 1998	Outpatients	28.6376	77.2235	8	Frequent relapse + long latency	Frequent relapse + long latency, Old World	Old World	tropical	Old World, tropical
126_1855	No	NA	360	CQ	Chloroquine	600 mg d0 + 300 mg d1	900 mg	India	Wild - Dehli, India	P14	P14_126	126	1998	Adak et al, 1998	Outpatients	28.6376	77.2235	8	Frequent relapse + long latency	Frequent relapse + long latency, Old World	Old World	tropical	Old World, tropical
126_1856	No	NA	360	CQ	Chloroquine	600 mg d0 + 300 mg d1	900 mg	India	Wild - Dehli, India	P14	P14_126	126	1998	Adak et al, 1998	Outpatients	28.6376	77.2235	8	Frequent relapse + long latency	Frequent relapse + long latency, Old World	Old World	tropical	Old World, tropical
126_1857	No	NA	360	CQ	Chloroquine	600 mg d0 + 300 mg d1	900 mg	India	Wild - Dehli, India	P14	P14_126	126	1998	Adak et al, 1998	Outpatients	28.6376	77.2235	8	Frequent relapse + long latency	Frequent relapse + long latency, Old World	Old World	tropical	Old World, tropical
126_1858	No	NA	360	CQ	Chloroquine	600 mg d0 + 300 mg d1	900 mg	India	Wild - Dehli, India	P14	P14_126	126	1998	Adak et al, 1998	Outpatients	28.6376	77.2235	8	Frequent relapse + long latency	Frequent relapse + long latency, Old World	Old World	tropical	Old World, tropical
126_1859	No	NA	360	CQ	Chloroquine	600 mg d0 + 300 mg d1	900 mg	India	Wild - Dehli, India	P14	P14_126	126	1998	Adak et al, 1998	Outpatients	28.6376	77.2235	8	Frequent relapse + long latency	Frequent relapse + long latency, Old World	Old World	tropical	Old World, tropical
126_186	Yes	90	90	CQ	Chloroquine	600 mg d0 + 300 mg d1	900 mg	India	Wild - Dehli, India	P14	P14_126	126	1998	Adak et al, 1998	Outpatients	28.6376	77.2235	8	Frequent relapse + long latency	Frequent relapse + long latency, Old World	Old World	tropical	Old World, tropical
126_1860	No	NA	360	CQ	Chloroquine	600 mg d0 + 300 mg d1	900 mg	India	Wild - Dehli, India	P14	P14_126	126	1998	Adak et al, 1998	Outpatients	28.6376	77.2235	8	Frequent relapse + long latency	Frequent relapse + long latency, Old World	Old World	tropical	Old World, tropical
126_1861	No	NA	360	CQ	Chloroquine	600 mg d0 + 300 mg d1	900 mg	India	Wild - Dehli, India	P14	P14_126	126	1998	Adak et al, 1998	Outpatients	28.6376	77.2235	8	Frequent relapse + long latency	Frequent relapse + long latency, Old World	Old World	tropical	Old World, tropical
126_1862	No	NA	360	CQ	Chloroquine	600 mg d0 + 300 mg d1	900 mg	India	Wild - Dehli, India	P14	P14_126	126	1998	Adak et al, 1998	Outpatients	28.6376	77.2235	8	Frequent relapse + long latency	Frequent relapse + long latency, Old World	Old World	tropical	Old World, tropical
126_1863	No	NA	360	CQ	Chloroquine	600 mg d0 + 300 mg d1	900 mg	India	Wild - Dehli, India	P14	P14_126	126	1998	Adak et al, 1998	Outpatients	28.6376	77.2235	8	Frequent relapse + long latency	Frequent relapse + long latency, Old World	Old World	tropical	Old World, tropical
126_1864	No	NA	360	CQ	Chloroquine	600 mg d0 + 300 mg d1	900 mg	India	Wild - Dehli, India	P14	P14_126	126	1998	Adak et al, 1998	Outpatients	28.6376	77.2235	8	Frequent relapse + long latency	Frequent relapse + long latency, Old World	Old World	tropical	Old World, tropical
126_1865	No	NA	360	CQ	Chloroquine	600 mg d0 + 300 mg d1	900 mg	India	Wild - Dehli, India	P14	P14_126	126	1998	Adak et al, 1998	Outpatients	28.6376	77.2235	8	Frequent relapse + long latency	Frequent relapse + long latency, Old World	Old World	tropical	Old World, tropical
126_1866	No	NA	360	CQ	Chloroquine	600 mg d0 + 300 mg d1	900 mg	India	Wild - Dehli, India	P14	P14_126	126	1998	Adak et al, 1998	Outpatients	28.6376	77.2235	8	Frequent relapse + long latency	Frequent relapse + long latency, Old World	Old World	tropical	Old World, tropical
126_1867	No	NA	360	CQ	Chloroquine	600 mg d0 + 300 mg d1	900 mg	India	Wild - Dehli, India	P14	P14_126	126	1998	Adak et al, 1998	Outpatients	28.6376	77.2235	8	Frequent relapse + long latency	Frequent relapse + long latency, Old World	Old World	tropical	Old World, tropical
126_1868	No	NA	360	CQ	Chloroquine	600 mg d0 + 300 mg d1	900 mg	India	Wild - Dehli, India	P14	P14_126	126	1998	Adak et al, 1998	Outpatients	28.6376	77.2235	8	Frequent relapse + long latency	Frequent relapse + long latency, Old World	Old World	tropical	Old World, tropical
126_1869	No	NA	360	CQ	Chloroquine	600 mg d0 + 300 mg d1	900 mg	India	Wild - Dehli, India	P14	P14_126	126	1998	Adak et al, 1998	Outpatients	28.6376	77.2235	8	Frequent relapse + long latency	Frequent relapse + long latency, Old World	Old World	tropical	Old World, tropical
126_187	Yes	90	90	CQ	Chloroquine	600 mg d0 + 300 mg d1	900 mg	India	Wild - Dehli, India	P14	P14_126	126	1998	Adak et al, 1998	Outpatients	28.6376	77.2235	8	Frequent relapse + long latency	Frequent relapse + long latency, Old World	Old World	tropical	Old World, tropical
126_1870	No	NA	360	CQ	Chloroquine	600 mg d0 + 300 mg d1	900 mg	India	Wild - Dehli, India	P14	P14_126	126	1998	Adak et al, 1998	Outpatients	28.6376	77.2235	8	Frequent relapse + long latency	Frequent relapse + long latency, Old World	Old World	tropical	Old World, tropical
126_1871	No	NA	360	CQ	Chloroquine	600 mg d0 + 300 mg d1	900 mg	India	Wild - Dehli, India	P14	P14_126	126	1998	Adak et al, 1998	Outpatients	28.6376	77.2235	8	Frequent relapse + long latency	Frequent relapse + long latency, Old World	Old World	tropical	Old World, tropical
126_1872	No	NA	360	CQ	Chloroquine	600 mg d0 + 300 mg d1	900 mg	India	Wild - Dehli, India	P14	P14_126	126	1998	Adak et al, 1998	Outpatients	28.6376	77.2235	8	Frequent relapse + long latency	Frequent relapse + long latency, Old World	Old World	tropical	Old World, tropical
126_1873	No	NA	360	CQ	Chloroquine	600 mg d0 + 300 mg d1	900 mg	India	Wild - Dehli, India	P14	P14_126	126	1998	Adak et al, 1998	Outpatients	28.6376	77.2235	8	Frequent relapse + long latency	Frequent relapse + long latency, Old World	Old World	tropical	Old World, tropical
126_1874	No	NA	360	CQ	Chloroquine	600 mg d0 + 300 mg d1	900 mg	India	Wild - Dehli, India	P14	P14_126	126	1998	Adak et al, 1998	Outpatients	28.6376	77.2235	8	Frequent relapse + long latency	Frequent relapse + long latency, Old World	Old World	tropical	Old World, tropical
126_1875	No	NA	360	CQ	Chloroquine	600 mg d0 + 300 mg d1	900 mg	India	Wild - Dehli, India	P14	P14_126	126	1998	Adak et al, 1998	Outpatients	28.6376	77.2235	8	Frequent relapse + long latency	Frequent relapse + long latency, Old World	Old World	tropical	Old World, tropical
126_1876	No	NA	360	CQ	Chloroquine	600 mg d0 + 300 mg d1	900 mg	India	Wild - Dehli, India	P14	P14_126	126	1998	Adak et al, 1998	Outpatients	28.6376	77.2235	8	Frequent relapse + long latency	Frequent relapse + long latency, Old World	Old World	tropical	Old World, tropical
126_1877	No	NA	360	CQ	Chloroquine	600 mg d0 + 300 mg d1	900 mg	India	Wild - Dehli, India	P14	P14_126	126	1998	Adak et al, 1998	Outpatients	28.6376	77.2235	8	Frequent relapse + long latency	Frequent relapse + long latency, Old World	Old World	tropical	Old World, tropical
126_1878	No	NA	360	CQ	Chloroquine	600 mg d0 + 300 mg d1	900 mg	India	Wild - Dehli, India	P14	P14_126	126	1998	Adak et al, 1998	Outpatients	28.6376	77.2235	8	Frequent relapse + long latency	Frequent relapse + long latency, Old World	Old World	tropical	Old World, tropical
126_1879	No	NA	360	CQ	Chloroquine	600 mg d0 + 300 mg d1	900 mg	India	Wild - Dehli, India	P14	P14_126	126	1998	Adak et al, 1998	Outpatients	28.6376	77.2235	8	Frequent relapse + long latency	Frequent relapse + long latency, Old World	Old World	tropical	Old World, tropical
126_188	Yes	90	90	CQ	Chloroquine	600 mg d0 + 300 mg d1	900 mg	India	Wild - Dehli, India	P14	P14_126	126	1998	Adak et al, 1998	Outpatients	28.6376	77.2235	8	Frequent relapse + long latency	Frequent relapse + long latency, Old World	Old World	tropical	Old World, tropical
126_1880	No	NA	360	CQ	Chloroquine	600 mg d0 + 300 mg d1	900 mg	India	Wild - Dehli, India	P14	P14_126	126	1998	Adak et al, 1998	Outpatients	28.6376	77.2235	8	Frequent relapse + long latency	Frequent relapse + long latency, Old World	Old World	tropical	Old World, tropical
126_1881	No	NA	360	CQ	Chloroquine	600 mg d0 + 300 mg d1	900 mg	India	Wild - Dehli, India	P14	P14_126	126	1998	Adak et al, 1998	Outpatients	28.6376	77.2235	8	Frequent relapse + long latency	Frequent relapse + long latency, Old World	Old World	tropical	Old World, tropical
126_1882	No	NA	360	CQ	Chloroquine	600 mg d0 + 300 mg d1	900 mg	India	Wild - Dehli, India	P14	P14_126	126	1998	Adak et al, 1998	Outpatients	28.6376	77.2235	8	Frequent relapse + long latency	Frequent relapse + long latency, Old World	Old World	tropical	Old World, tropical
126_1883	No	NA	360	CQ	Chloroquine	600 mg d0 + 300 mg d1	900 mg	India	Wild - Dehli, India	P14	P14_126	126	1998	Adak et al, 1998	Outpatients	28.6376	77.2235	8	Frequent relapse + long latency	Frequent relapse + long latency, Old World	Old World	tropical	Old World, tropical
126_1884	No	NA	360	CQ	Chloroquine	600 mg d0 + 300 mg d1	900 mg	India	Wild - Dehli, India	P14	P14_126	126	1998	Adak et al, 1998	Outpatients	28.6376	77.2235	8	Frequent relapse + long latency	Frequent relapse + long latency, Old World	Old World	tropical	Old World, tropical
126_1885	No	NA	360	CQ	Chloroquine	600 mg d0 + 300 mg d1	900 mg	India	Wild - Dehli, India	P14	P14_126	126	1998	Adak et al, 1998	Outpatients	28.6376	77.2235	8	Frequent relapse + long latency	Frequent relapse + long latency, Old World	Old World	tropical	Old World, tropical
126_1886	No	NA	360	CQ	Chloroquine	600 mg d0 + 300 mg d1	900 mg	India	Wild - Dehli, India	P14	P14_126	126	1998	Adak et al, 1998	Outpatients	28.6376	77.2235	8	Frequent relapse + long latency	Frequent relapse + long latency, Old World	Old World	tropical	Old World, tropical
126_1887	No	NA	360	CQ	Chloroquine	600 mg d0 + 300 mg d1	900 mg	India	Wild - Dehli, India	P14	P14_126	126	1998	Adak et al, 1998	Outpatients	28.6376	77.2235	8	Frequent relapse + long latency	Frequent relapse + long latency, Old World	Old World	tropical	Old World, tropical
126_1888	No	NA	360	CQ	Chloroquine	600 mg d0 + 300 mg d1	900 mg	India	Wild - Dehli, India	P14	P14_126	126	1998	Adak et al, 1998	Outpatients	28.6376	77.2235	8	Frequent relapse + long latency	Frequent relapse + long latency, Old World	Old World	tropical	Old World, tropical
126_1889	No	NA	360	CQ	Chloroquine	600 mg d0 + 300 mg d1	900 mg	India	Wild - Dehli, India	P14	P14_126	126	1998	Adak et al, 1998	Outpatients	28.6376	77.2235	8	Frequent relapse + long latency	Frequent relapse + long latency, Old World	Old World	tropical	Old World, tropical
126_189	Yes	90	90	CQ	Chloroquine	600 mg d0 + 300 mg d1	900 mg	India	Wild - Dehli, India	P14	P14_126	126	1998	Adak et al, 1998	Outpatients	28.6376	77.2235	8	Frequent relapse + long latency	Frequent relapse + long latency, Old World	Old World	tropical	Old World, tropical
126_1890	No	NA	360	CQ	Chloroquine	600 mg d0 + 300 mg d1	900 mg	India	Wild - Dehli, India	P14	P14_126	126	1998	Adak et al, 1998	Outpatients	28.6376	77.2235	8	Frequent relapse + long latency	Frequent relapse + long latency, Old World	Old World	tropical	Old World, tropical
126_1891	No	NA	360	CQ	Chloroquine	600 mg d0 + 300 mg d1	900 mg	India	Wild - Dehli, India	P14	P14_126	126	1998	Adak et al, 1998	Outpatients	28.6376	77.2235	8	Frequent relapse + long latency	Frequent relapse + long latency, Old World	Old World	tropical	Old World, tropical
126_1892	No	NA	360	CQ	Chloroquine	600 mg d0 + 300 mg d1	900 mg	India	Wild - Dehli, India	P14	P14_126	126	1998	Adak et al, 1998	Outpatients	28.6376	77.2235	8	Frequent relapse + long latency	Frequent relapse + long latency, Old World	Old World	tropical	Old World, tropical
126_1893	No	NA	360	CQ	Chloroquine	600 mg d0 + 300 mg d1	900 mg	India	Wild - Dehli, India	P14	P14_126	126	1998	Adak et al, 1998	Outpatients	28.6376	77.2235	8	Frequent relapse + long latency	Frequent relapse + long latency, Old World	Old World	tropical	Old World, tropical
126_1894	No	NA	360	CQ	Chloroquine	600 mg d0 + 300 mg d1	900 mg	India	Wild - Dehli, India	P14	P14_126	126	1998	Adak et al, 1998	Outpatients	28.6376	77.2235	8	Frequent relapse + long latency	Frequent relapse + long latency, Old World	Old World	tropical	Old World, tropical
126_1895	No	NA	360	CQ	Chloroquine	600 mg d0 + 300 mg d1	900 mg	India	Wild - Dehli, India	P14	P14_126	126	1998	Adak et al, 1998	Outpatients	28.6376	77.2235	8	Frequent relapse + long latency	Frequent relapse + long latency, Old World	Old World	tropical	Old World, tropical
126_1896	No	NA	360	CQ	Chloroquine	600 mg d0 + 300 mg d1	900 mg	India	Wild - Dehli, India	P14	P14_126	126	1998	Adak et al, 1998	Outpatients	28.6376	77.2235	8	Frequent relapse + long latency	Frequent relapse + long latency, Old World	Old World	tropical	Old World, tropical
126_1897	No	NA	360	CQ	Chloroquine	600 mg d0 + 300 mg d1	900 mg	India	Wild - Dehli, India	P14	P14_126	126	1998	Adak et al, 1998	Outpatients	28.6376	77.2235	8	Frequent relapse + long latency	Frequent relapse + long latency, Old World	Old World	tropical	Old World, tropical
126_1898	No	NA	360	CQ	Chloroquine	600 mg d0 + 300 mg d1	900 mg	India	Wild - Dehli, India	P14	P14_126	126	1998	Adak et al, 1998	Outpatients	28.6376	77.2235	8	Frequent relapse + long latency	Frequent relapse + long latency, Old World	Old World	tropical	Old World, tropical
126_1899	No	NA	360	CQ	Chloroquine	600 mg d0 + 300 mg d1	900 mg	India	Wild - Dehli, India	P14	P14_126	126	1998	Adak et al, 1998	Outpatients	28.6376	77.2235	8	Frequent relapse + long latency	Frequent relapse + long latency, Old World	Old World	tropical	Old World, tropical
126_19	Yes	30	30	CQ	Chloroquine	600 mg d0 + 300 mg d1	900 mg	India	Wild - Dehli, India	P14	P14_126	126	1998	Adak et al, 1998	Outpatients	28.6376	77.2235	8	Frequent relapse + long latency	Frequent relapse + long latency, Old World	Old World	tropical	Old World, tropical
126_190	Yes	90	90	CQ	Chloroquine	600 mg d0 + 300 mg d1	900 mg	India	Wild - Dehli, India	P14	P14_126	126	1998	Adak et al, 1998	Outpatients	28.6376	77.2235	8	Frequent relapse + long latency	Frequent relapse + long latency, Old World	Old World	tropical	Old World, tropical
126_1900	No	NA	360	CQ	Chloroquine	600 mg d0 + 300 mg d1	900 mg	India	Wild - Dehli, India	P14	P14_126	126	1998	Adak et al, 1998	Outpatients	28.6376	77.2235	8	Frequent relapse + long latency	Frequent relapse + long latency, Old World	Old World	tropical	Old World, tropical
126_1901	No	NA	360	CQ	Chloroquine	600 mg d0 + 300 mg d1	900 mg	India	Wild - Dehli, India	P14	P14_126	126	1998	Adak et al, 1998	Outpatients	28.6376	77.2235	8	Frequent relapse + long latency	Frequent relapse + long latency, Old World	Old World	tropical	Old World, tropical
126_1902	No	NA	360	CQ	Chloroquine	600 mg d0 + 300 mg d1	900 mg	India	Wild - Dehli, India	P14	P14_126	126	1998	Adak et al, 1998	Outpatients	28.6376	77.2235	8	Frequent relapse + long latency	Frequent relapse + long latency, Old World	Old World	tropical	Old World, tropical
126_1903	No	NA	360	CQ	Chloroquine	600 mg d0 + 300 mg d1	900 mg	India	Wild - Dehli, India	P14	P14_126	126	1998	Adak et al, 1998	Outpatients	28.6376	77.2235	8	Frequent relapse + long latency	Frequent relapse + long latency, Old World	Old World	tropical	Old World, tropical
126_1904	No	NA	360	CQ	Chloroquine	600 mg d0 + 300 mg d1	900 mg	India	Wild - Dehli, India	P14	P14_126	126	1998	Adak et al, 1998	Outpatients	28.6376	77.2235	8	Frequent relapse + long latency	Frequent relapse + long latency, Old World	Old World	tropical	Old World, tropical
126_1905	No	NA	360	CQ	Chloroquine	600 mg d0 + 300 mg d1	900 mg	India	Wild - Dehli, India	P14	P14_126	126	1998	Adak et al, 1998	Outpatients	28.6376	77.2235	8	Frequent relapse + long latency	Frequent relapse + long latency, Old World	Old World	tropical	Old World, tropical
126_1906	No	NA	360	CQ	Chloroquine	600 mg d0 + 300 mg d1	900 mg	India	Wild - Dehli, India	P14	P14_126	126	1998	Adak et al, 1998	Outpatients	28.6376	77.2235	8	Frequent relapse + long latency	Frequent relapse + long latency, Old World	Old World	tropical	Old World, tropical
126_1907	No	NA	360	CQ	Chloroquine	600 mg d0 + 300 mg d1	900 mg	India	Wild - Dehli, India	P14	P14_126	126	1998	Adak et al, 1998	Outpatients	28.6376	77.2235	8	Frequent relapse + long latency	Frequent relapse + long latency, Old World	Old World	tropical	Old World, tropical
126_1908	No	NA	360	CQ	Chloroquine	600 mg d0 + 300 mg d1	900 mg	India	Wild - Dehli, India	P14	P14_126	126	1998	Adak et al, 1998	Outpatients	28.6376	77.2235	8	Frequent relapse + long latency	Frequent relapse + long latency, Old World	Old World	tropical	Old World, tropical
126_1909	No	NA	360	CQ	Chloroquine	600 mg d0 + 300 mg d1	900 mg	India	Wild - Dehli, India	P14	P14_126	126	1998	Adak et al, 1998	Outpatients	28.6376	77.2235	8	Frequent relapse + long latency	Frequent relapse + long latency, Old World	Old World	tropical	Old World, tropical
126_191	Yes	90	90	CQ	Chloroquine	600 mg d0 + 300 mg d1	900 mg	India	Wild - Dehli, India	P14	P14_126	126	1998	Adak et al, 1998	Outpatients	28.6376	77.2235	8	Frequent relapse + long latency	Frequent relapse + long latency, Old World	Old World	tropical	Old World, tropical
126_1910	No	NA	360	CQ	Chloroquine	600 mg d0 + 300 mg d1	900 mg	India	Wild - Dehli, India	P14	P14_126	126	1998	Adak et al, 1998	Outpatients	28.6376	77.2235	8	Frequent relapse + long latency	Frequent relapse + long latency, Old World	Old World	tropical	Old World, tropical
126_1911	No	NA	360	CQ	Chloroquine	600 mg d0 + 300 mg d1	900 mg	India	Wild - Dehli, India	P14	P14_126	126	1998	Adak et al, 1998	Outpatients	28.6376	77.2235	8	Frequent relapse + long latency	Frequent relapse + long latency, Old World	Old World	tropical	Old World, tropical
126_1912	No	NA	360	CQ	Chloroquine	600 mg d0 + 300 mg d1	900 mg	India	Wild - Dehli, India	P14	P14_126	126	1998	Adak et al, 1998	Outpatients	28.6376	77.2235	8	Frequent relapse + long latency	Frequent relapse + long latency, Old World	Old World	tropical	Old World, tropical
126_1913	No	NA	360	CQ	Chloroquine	600 mg d0 + 300 mg d1	900 mg	India	Wild - Dehli, India	P14	P14_126	126	1998	Adak et al, 1998	Outpatients	28.6376	77.2235	8	Frequent relapse + long latency	Frequent relapse + long latency, Old World	Old World	tropical	Old World, tropical
126_1914	No	NA	360	CQ	Chloroquine	600 mg d0 + 300 mg d1	900 mg	India	Wild - Dehli, India	P14	P14_126	126	1998	Adak et al, 1998	Outpatients	28.6376	77.2235	8	Frequent relapse + long latency	Frequent relapse + long latency, Old World	Old World	tropical	Old World, tropical
126_1915	No	NA	360	CQ	Chloroquine	600 mg d0 + 300 mg d1	900 mg	India	Wild - Dehli, India	P14	P14_126	126	1998	Adak et al, 1998	Outpatients	28.6376	77.2235	8	Frequent relapse + long latency	Frequent relapse + long latency, Old World	Old World	tropical	Old World, tropical
126_1916	No	NA	360	CQ	Chloroquine	600 mg d0 + 300 mg d1	900 mg	India	Wild - Dehli, India	P14	P14_126	126	1998	Adak et al, 1998	Outpatients	28.6376	77.2235	8	Frequent relapse + long latency	Frequent relapse + long latency, Old World	Old World	tropical	Old World, tropical
126_1917	No	NA	360	CQ	Chloroquine	600 mg d0 + 300 mg d1	900 mg	India	Wild - Dehli, India	P14	P14_126	126	1998	Adak et al, 1998	Outpatients	28.6376	77.2235	8	Frequent relapse + long latency	Frequent relapse + long latency, Old World	Old World	tropical	Old World, tropical
126_1918	No	NA	360	CQ	Chloroquine	600 mg d0 + 300 mg d1	900 mg	India	Wild - Dehli, India	P14	P14_126	126	1998	Adak et al, 1998	Outpatients	28.6376	77.2235	8	Frequent relapse + long latency	Frequent relapse + long latency, Old World	Old World	tropical	Old World, tropical
126_1919	No	NA	360	CQ	Chloroquine	600 mg d0 + 300 mg d1	900 mg	India	Wild - Dehli, India	P14	P14_126	126	1998	Adak et al, 1998	Outpatients	28.6376	77.2235	8	Frequent relapse + long latency	Frequent relapse + long latency, Old World	Old World	tropical	Old World, tropical
126_192	Yes	90	90	CQ	Chloroquine	600 mg d0 + 300 mg d1	900 mg	India	Wild - Dehli, India	P14	P14_126	126	1998	Adak et al, 1998	Outpatients	28.6376	77.2235	8	Frequent relapse + long latency	Frequent relapse + long latency, Old World	Old World	tropical	Old World, tropical
126_1920	No	NA	360	CQ	Chloroquine	600 mg d0 + 300 mg d1	900 mg	India	Wild - Dehli, India	P14	P14_126	126	1998	Adak et al, 1998	Outpatients	28.6376	77.2235	8	Frequent relapse + long latency	Frequent relapse + long latency, Old World	Old World	tropical	Old World, tropical
126_1921	No	NA	360	CQ	Chloroquine	600 mg d0 + 300 mg d1	900 mg	India	Wild - Dehli, India	P14	P14_126	126	1998	Adak et al, 1998	Outpatients	28.6376	77.2235	8	Frequent relapse + long latency	Frequent relapse + long latency, Old World	Old World	tropical	Old World, tropical
126_1922	No	NA	360	CQ	Chloroquine	600 mg d0 + 300 mg d1	900 mg	India	Wild - Dehli, India	P14	P14_126	126	1998	Adak et al, 1998	Outpatients	28.6376	77.2235	8	Frequent relapse + long latency	Frequent relapse + long latency, Old World	Old World	tropical	Old World, tropical
126_1923	No	NA	360	CQ	Chloroquine	600 mg d0 + 300 mg d1	900 mg	India	Wild - Dehli, India	P14	P14_126	126	1998	Adak et al, 1998	Outpatients	28.6376	77.2235	8	Frequent relapse + long latency	Frequent relapse + long latency, Old World	Old World	tropical	Old World, tropical
126_1924	No	NA	360	CQ	Chloroquine	600 mg d0 + 300 mg d1	900 mg	India	Wild - Dehli, India	P14	P14_126	126	1998	Adak et al, 1998	Outpatients	28.6376	77.2235	8	Frequent relapse + long latency	Frequent relapse + long latency, Old World	Old World	tropical	Old World, tropical
126_1925	No	NA	360	CQ	Chloroquine	600 mg d0 + 300 mg d1	900 mg	India	Wild - Dehli, India	P14	P14_126	126	1998	Adak et al, 1998	Outpatients	28.6376	77.2235	8	Frequent relapse + long latency	Frequent relapse + long latency, Old World	Old World	tropical	Old World, tropical
126_1926	No	NA	360	CQ	Chloroquine	600 mg d0 + 300 mg d1	900 mg	India	Wild - Dehli, India	P14	P14_126	126	1998	Adak et al, 1998	Outpatients	28.6376	77.2235	8	Frequent relapse + long latency	Frequent relapse + long latency, Old World	Old World	tropical	Old World, tropical
126_1927	No	NA	360	CQ	Chloroquine	600 mg d0 + 300 mg d1	900 mg	India	Wild - Dehli, India	P14	P14_126	126	1998	Adak et al, 1998	Outpatients	28.6376	77.2235	8	Frequent relapse + long latency	Frequent relapse + long latency, Old World	Old World	tropical	Old World, tropical
126_1928	No	NA	360	CQ	Chloroquine	600 mg d0 + 300 mg d1	900 mg	India	Wild - Dehli, India	P14	P14_126	126	1998	Adak et al, 1998	Outpatients	28.6376	77.2235	8	Frequent relapse + long latency	Frequent relapse + long latency, Old World	Old World	tropical	Old World, tropical
126_1929	No	NA	360	CQ	Chloroquine	600 mg d0 + 300 mg d1	900 mg	India	Wild - Dehli, India	P14	P14_126	126	1998	Adak et al, 1998	Outpatients	28.6376	77.2235	8	Frequent relapse + long latency	Frequent relapse + long latency, Old World	Old World	tropical	Old World, tropical
126_193	Yes	90	90	CQ	Chloroquine	600 mg d0 + 300 mg d1	900 mg	India	Wild - Dehli, India	P14	P14_126	126	1998	Adak et al, 1998	Outpatients	28.6376	77.2235	8	Frequent relapse + long latency	Frequent relapse + long latency, Old World	Old World	tropical	Old World, tropical
126_1930	No	NA	360	CQ	Chloroquine	600 mg d0 + 300 mg d1	900 mg	India	Wild - Dehli, India	P14	P14_126	126	1998	Adak et al, 1998	Outpatients	28.6376	77.2235	8	Frequent relapse + long latency	Frequent relapse + long latency, Old World	Old World	tropical	Old World, tropical
126_1931	No	NA	360	CQ	Chloroquine	600 mg d0 + 300 mg d1	900 mg	India	Wild - Dehli, India	P14	P14_126	126	1998	Adak et al, 1998	Outpatients	28.6376	77.2235	8	Frequent relapse + long latency	Frequent relapse + long latency, Old World	Old World	tropical	Old World, tropical
126_1932	No	NA	360	CQ	Chloroquine	600 mg d0 + 300 mg d1	900 mg	India	Wild - Dehli, India	P14	P14_126	126	1998	Adak et al, 1998	Outpatients	28.6376	77.2235	8	Frequent relapse + long latency	Frequent relapse + long latency, Old World	Old World	tropical	Old World, tropical
126_1933	No	NA	360	CQ	Chloroquine	600 mg d0 + 300 mg d1	900 mg	India	Wild - Dehli, India	P14	P14_126	126	1998	Adak et al, 1998	Outpatients	28.6376	77.2235	8	Frequent relapse + long latency	Frequent relapse + long latency, Old World	Old World	tropical	Old World, tropical
126_1934	No	NA	360	CQ	Chloroquine	600 mg d0 + 300 mg d1	900 mg	India	Wild - Dehli, India	P14	P14_126	126	1998	Adak et al, 1998	Outpatients	28.6376	77.2235	8	Frequent relapse + long latency	Frequent relapse + long latency, Old World	Old World	tropical	Old World, tropical
126_1935	No	NA	360	CQ	Chloroquine	600 mg d0 + 300 mg d1	900 mg	India	Wild - Dehli, India	P14	P14_126	126	1998	Adak et al, 1998	Outpatients	28.6376	77.2235	8	Frequent relapse + long latency	Frequent relapse + long latency, Old World	Old World	tropical	Old World, tropical
126_1936	No	NA	360	CQ	Chloroquine	600 mg d0 + 300 mg d1	900 mg	India	Wild - Dehli, India	P14	P14_126	126	1998	Adak et al, 1998	Outpatients	28.6376	77.2235	8	Frequent relapse + long latency	Frequent relapse + long latency, Old World	Old World	tropical	Old World, tropical
126_1937	No	NA	360	CQ	Chloroquine	600 mg d0 + 300 mg d1	900 mg	India	Wild - Dehli, India	P14	P14_126	126	1998	Adak et al, 1998	Outpatients	28.6376	77.2235	8	Frequent relapse + long latency	Frequent relapse + long latency, Old World	Old World	tropical	Old World, tropical
126_1938	No	NA	360	CQ	Chloroquine	600 mg d0 + 300 mg d1	900 mg	India	Wild - Dehli, India	P14	P14_126	126	1998	Adak et al, 1998	Outpatients	28.6376	77.2235	8	Frequent relapse + long latency	Frequent relapse + long latency, Old World	Old World	tropical	Old World, tropical
126_1939	No	NA	360	CQ	Chloroquine	600 mg d0 + 300 mg d1	900 mg	India	Wild - Dehli, India	P14	P14_126	126	1998	Adak et al, 1998	Outpatients	28.6376	77.2235	8	Frequent relapse + long latency	Frequent relapse + long latency, Old World	Old World	tropical	Old World, tropical
126_194	Yes	90	90	CQ	Chloroquine	600 mg d0 + 300 mg d1	900 mg	India	Wild - Dehli, India	P14	P14_126	126	1998	Adak et al, 1998	Outpatients	28.6376	77.2235	8	Frequent relapse + long latency	Frequent relapse + long latency, Old World	Old World	tropical	Old World, tropical
126_1940	No	NA	360	CQ	Chloroquine	600 mg d0 + 300 mg d1	900 mg	India	Wild - Dehli, India	P14	P14_126	126	1998	Adak et al, 1998	Outpatients	28.6376	77.2235	8	Frequent relapse + long latency	Frequent relapse + long latency, Old World	Old World	tropical	Old World, tropical
126_1941	No	NA	360	CQ	Chloroquine	600 mg d0 + 300 mg d1	900 mg	India	Wild - Dehli, India	P14	P14_126	126	1998	Adak et al, 1998	Outpatients	28.6376	77.2235	8	Frequent relapse + long latency	Frequent relapse + long latency, Old World	Old World	tropical	Old World, tropical
126_1942	No	NA	360	CQ	Chloroquine	600 mg d0 + 300 mg d1	900 mg	India	Wild - Dehli, India	P14	P14_126	126	1998	Adak et al, 1998	Outpatients	28.6376	77.2235	8	Frequent relapse + long latency	Frequent relapse + long latency, Old World	Old World	tropical	Old World, tropical
126_1943	No	NA	360	CQ	Chloroquine	600 mg d0 + 300 mg d1	900 mg	India	Wild - Dehli, India	P14	P14_126	126	1998	Adak et al, 1998	Outpatients	28.6376	77.2235	8	Frequent relapse + long latency	Frequent relapse + long latency, Old World	Old World	tropical	Old World, tropical
126_1944	No	NA	360	CQ	Chloroquine	600 mg d0 + 300 mg d1	900 mg	India	Wild - Dehli, India	P14	P14_126	126	1998	Adak et al, 1998	Outpatients	28.6376	77.2235	8	Frequent relapse + long latency	Frequent relapse + long latency, Old World	Old World	tropical	Old World, tropical
126_1945	No	NA	360	CQ	Chloroquine	600 mg d0 + 300 mg d1	900 mg	India	Wild - Dehli, India	P14	P14_126	126	1998	Adak et al, 1998	Outpatients	28.6376	77.2235	8	Frequent relapse + long latency	Frequent relapse + long latency, Old World	Old World	tropical	Old World, tropical
126_1946	No	NA	360	CQ	Chloroquine	600 mg d0 + 300 mg d1	900 mg	India	Wild - Dehli, India	P14	P14_126	126	1998	Adak et al, 1998	Outpatients	28.6376	77.2235	8	Frequent relapse + long latency	Frequent relapse + long latency, Old World	Old World	tropical	Old World, tropical
126_1947	No	NA	360	CQ	Chloroquine	600 mg d0 + 300 mg d1	900 mg	India	Wild - Dehli, India	P14	P14_126	126	1998	Adak et al, 1998	Outpatients	28.6376	77.2235	8	Frequent relapse + long latency	Frequent relapse + long latency, Old World	Old World	tropical	Old World, tropical
126_1948	No	NA	360	CQ	Chloroquine	600 mg d0 + 300 mg d1	900 mg	India	Wild - Dehli, India	P14	P14_126	126	1998	Adak et al, 1998	Outpatients	28.6376	77.2235	8	Frequent relapse + long latency	Frequent relapse + long latency, Old World	Old World	tropical	Old World, tropical
126_1949	No	NA	360	CQ	Chloroquine	600 mg d0 + 300 mg d1	900 mg	India	Wild - Dehli, India	P14	P14_126	126	1998	Adak et al, 1998	Outpatients	28.6376	77.2235	8	Frequent relapse + long latency	Frequent relapse + long latency, Old World	Old World	tropical	Old World, tropical
126_195	Yes	90	90	CQ	Chloroquine	600 mg d0 + 300 mg d1	900 mg	India	Wild - Dehli, India	P14	P14_126	126	1998	Adak et al, 1998	Outpatients	28.6376	77.2235	8	Frequent relapse + long latency	Frequent relapse + long latency, Old World	Old World	tropical	Old World, tropical
126_1950	No	NA	360	CQ	Chloroquine	600 mg d0 + 300 mg d1	900 mg	India	Wild - Dehli, India	P14	P14_126	126	1998	Adak et al, 1998	Outpatients	28.6376	77.2235	8	Frequent relapse + long latency	Frequent relapse + long latency, Old World	Old World	tropical	Old World, tropical
126_1951	No	NA	360	CQ	Chloroquine	600 mg d0 + 300 mg d1	900 mg	India	Wild - Dehli, India	P14	P14_126	126	1998	Adak et al, 1998	Outpatients	28.6376	77.2235	8	Frequent relapse + long latency	Frequent relapse + long latency, Old World	Old World	tropical	Old World, tropical
126_1952	No	NA	360	CQ	Chloroquine	600 mg d0 + 300 mg d1	900 mg	India	Wild - Dehli, India	P14	P14_126	126	1998	Adak et al, 1998	Outpatients	28.6376	77.2235	8	Frequent relapse + long latency	Frequent relapse + long latency, Old World	Old World	tropical	Old World, tropical
126_1953	No	NA	360	CQ	Chloroquine	600 mg d0 + 300 mg d1	900 mg	India	Wild - Dehli, India	P14	P14_126	126	1998	Adak et al, 1998	Outpatients	28.6376	77.2235	8	Frequent relapse + long latency	Frequent relapse + long latency, Old World	Old World	tropical	Old World, tropical
126_1954	No	NA	360	CQ	Chloroquine	600 mg d0 + 300 mg d1	900 mg	India	Wild - Dehli, India	P14	P14_126	126	1998	Adak et al, 1998	Outpatients	28.6376	77.2235	8	Frequent relapse + long latency	Frequent relapse + long latency, Old World	Old World	tropical	Old World, tropical
126_1955	No	NA	360	CQ	Chloroquine	600 mg d0 + 300 mg d1	900 mg	India	Wild - Dehli, India	P14	P14_126	126	1998	Adak et al, 1998	Outpatients	28.6376	77.2235	8	Frequent relapse + long latency	Frequent relapse + long latency, Old World	Old World	tropical	Old World, tropical
126_1956	No	NA	360	CQ	Chloroquine	600 mg d0 + 300 mg d1	900 mg	India	Wild - Dehli, India	P14	P14_126	126	1998	Adak et al, 1998	Outpatients	28.6376	77.2235	8	Frequent relapse + long latency	Frequent relapse + long latency, Old World	Old World	tropical	Old World, tropical
126_1957	No	NA	360	CQ	Chloroquine	600 mg d0 + 300 mg d1	900 mg	India	Wild - Dehli, India	P14	P14_126	126	1998	Adak et al, 1998	Outpatients	28.6376	77.2235	8	Frequent relapse + long latency	Frequent relapse + long latency, Old World	Old World	tropical	Old World, tropical
126_1958	No	NA	360	CQ	Chloroquine	600 mg d0 + 300 mg d1	900 mg	India	Wild - Dehli, India	P14	P14_126	126	1998	Adak et al, 1998	Outpatients	28.6376	77.2235	8	Frequent relapse + long latency	Frequent relapse + long latency, Old World	Old World	tropical	Old World, tropical
126_1959	No	NA	360	CQ	Chloroquine	600 mg d0 + 300 mg d1	900 mg	India	Wild - Dehli, India	P14	P14_126	126	1998	Adak et al, 1998	Outpatients	28.6376	77.2235	8	Frequent relapse + long latency	Frequent relapse + long latency, Old World	Old World	tropical	Old World, tropical
126_196	Yes	90	90	CQ	Chloroquine	600 mg d0 + 300 mg d1	900 mg	India	Wild - Dehli, India	P14	P14_126	126	1998	Adak et al, 1998	Outpatients	28.6376	77.2235	8	Frequent relapse + long latency	Frequent relapse + long latency, Old World	Old World	tropical	Old World, tropical
126_1960	No	NA	360	CQ	Chloroquine	600 mg d0 + 300 mg d1	900 mg	India	Wild - Dehli, India	P14	P14_126	126	1998	Adak et al, 1998	Outpatients	28.6376	77.2235	8	Frequent relapse + long latency	Frequent relapse + long latency, Old World	Old World	tropical	Old World, tropical
126_1961	No	NA	360	CQ	Chloroquine	600 mg d0 + 300 mg d1	900 mg	India	Wild - Dehli, India	P14	P14_126	126	1998	Adak et al, 1998	Outpatients	28.6376	77.2235	8	Frequent relapse + long latency	Frequent relapse + long latency, Old World	Old World	tropical	Old World, tropical
126_1962	No	NA	360	CQ	Chloroquine	600 mg d0 + 300 mg d1	900 mg	India	Wild - Dehli, India	P14	P14_126	126	1998	Adak et al, 1998	Outpatients	28.6376	77.2235	8	Frequent relapse + long latency	Frequent relapse + long latency, Old World	Old World	tropical	Old World, tropical
126_1963	No	NA	360	CQ	Chloroquine	600 mg d0 + 300 mg d1	900 mg	India	Wild - Dehli, India	P14	P14_126	126	1998	Adak et al, 1998	Outpatients	28.6376	77.2235	8	Frequent relapse + long latency	Frequent relapse + long latency, Old World	Old World	tropical	Old World, tropical
126_1964	No	NA	360	CQ	Chloroquine	600 mg d0 + 300 mg d1	900 mg	India	Wild - Dehli, India	P14	P14_126	126	1998	Adak et al, 1998	Outpatients	28.6376	77.2235	8	Frequent relapse + long latency	Frequent relapse + long latency, Old World	Old World	tropical	Old World, tropical
126_1965	No	NA	360	CQ	Chloroquine	600 mg d0 + 300 mg d1	900 mg	India	Wild - Dehli, India	P14	P14_126	126	1998	Adak et al, 1998	Outpatients	28.6376	77.2235	8	Frequent relapse + long latency	Frequent relapse + long latency, Old World	Old World	tropical	Old World, tropical
126_1966	No	NA	360	CQ	Chloroquine	600 mg d0 + 300 mg d1	900 mg	India	Wild - Dehli, India	P14	P14_126	126	1998	Adak et al, 1998	Outpatients	28.6376	77.2235	8	Frequent relapse + long latency	Frequent relapse + long latency, Old World	Old World	tropical	Old World, tropical
126_1967	No	NA	360	CQ	Chloroquine	600 mg d0 + 300 mg d1	900 mg	India	Wild - Dehli, India	P14	P14_126	126	1998	Adak et al, 1998	Outpatients	28.6376	77.2235	8	Frequent relapse + long latency	Frequent relapse + long latency, Old World	Old World	tropical	Old World, tropical
126_1968	No	NA	360	CQ	Chloroquine	600 mg d0 + 300 mg d1	900 mg	India	Wild - Dehli, India	P14	P14_126	126	1998	Adak et al, 1998	Outpatients	28.6376	77.2235	8	Frequent relapse + long latency	Frequent relapse + long latency, Old World	Old World	tropical	Old World, tropical
126_1969	No	NA	360	CQ	Chloroquine	600 mg d0 + 300 mg d1	900 mg	India	Wild - Dehli, India	P14	P14_126	126	1998	Adak et al, 1998	Outpatients	28.6376	77.2235	8	Frequent relapse + long latency	Frequent relapse + long latency, Old World	Old World	tropical	Old World, tropical
126_197	Yes	90	90	CQ	Chloroquine	600 mg d0 + 300 mg d1	900 mg	India	Wild - Dehli, India	P14	P14_126	126	1998	Adak et al, 1998	Outpatients	28.6376	77.2235	8	Frequent relapse + long latency	Frequent relapse + long latency, Old World	Old World	tropical	Old World, tropical
126_1970	No	NA	360	CQ	Chloroquine	600 mg d0 + 300 mg d1	900 mg	India	Wild - Dehli, India	P14	P14_126	126	1998	Adak et al, 1998	Outpatients	28.6376	77.2235	8	Frequent relapse + long latency	Frequent relapse + long latency, Old World	Old World	tropical	Old World, tropical
126_1971	No	NA	360	CQ	Chloroquine	600 mg d0 + 300 mg d1	900 mg	India	Wild - Dehli, India	P14	P14_126	126	1998	Adak et al, 1998	Outpatients	28.6376	77.2235	8	Frequent relapse + long latency	Frequent relapse + long latency, Old World	Old World	tropical	Old World, tropical
126_1972	No	NA	360	CQ	Chloroquine	600 mg d0 + 300 mg d1	900 mg	India	Wild - Dehli, India	P14	P14_126	126	1998	Adak et al, 1998	Outpatients	28.6376	77.2235	8	Frequent relapse + long latency	Frequent relapse + long latency, Old World	Old World	tropical	Old World, tropical
126_1973	No	NA	360	CQ	Chloroquine	600 mg d0 + 300 mg d1	900 mg	India	Wild - Dehli, India	P14	P14_126	126	1998	Adak et al, 1998	Outpatients	28.6376	77.2235	8	Frequent relapse + long latency	Frequent relapse + long latency, Old World	Old World	tropical	Old World, tropical
126_1974	No	NA	360	CQ	Chloroquine	600 mg d0 + 300 mg d1	900 mg	India	Wild - Dehli, India	P14	P14_126	126	1998	Adak et al, 1998	Outpatients	28.6376	77.2235	8	Frequent relapse + long latency	Frequent relapse + long latency, Old World	Old World	tropical	Old World, tropical
126_1975	No	NA	360	CQ	Chloroquine	600 mg d0 + 300 mg d1	900 mg	India	Wild - Dehli, India	P14	P14_126	126	1998	Adak et al, 1998	Outpatients	28.6376	77.2235	8	Frequent relapse + long latency	Frequent relapse + long latency, Old World	Old World	tropical	Old World, tropical
126_1976	No	NA	360	CQ	Chloroquine	600 mg d0 + 300 mg d1	900 mg	India	Wild - Dehli, India	P14	P14_126	126	1998	Adak et al, 1998	Outpatients	28.6376	77.2235	8	Frequent relapse + long latency	Frequent relapse + long latency, Old World	Old World	tropical	Old World, tropical
126_1977	No	NA	360	CQ	Chloroquine	600 mg d0 + 300 mg d1	900 mg	India	Wild - Dehli, India	P14	P14_126	126	1998	Adak et al, 1998	Outpatients	28.6376	77.2235	8	Frequent relapse + long latency	Frequent relapse + long latency, Old World	Old World	tropical	Old World, tropical
126_1978	No	NA	360	CQ	Chloroquine	600 mg d0 + 300 mg d1	900 mg	India	Wild - Dehli, India	P14	P14_126	126	1998	Adak et al, 1998	Outpatients	28.6376	77.2235	8	Frequent relapse + long latency	Frequent relapse + long latency, Old World	Old World	tropical	Old World, tropical
126_1979	No	NA	360	CQ	Chloroquine	600 mg d0 + 300 mg d1	900 mg	India	Wild - Dehli, India	P14	P14_126	126	1998	Adak et al, 1998	Outpatients	28.6376	77.2235	8	Frequent relapse + long latency	Frequent relapse + long latency, Old World	Old World	tropical	Old World, tropical
126_198	Yes	90	90	CQ	Chloroquine	600 mg d0 + 300 mg d1	900 mg	India	Wild - Dehli, India	P14	P14_126	126	1998	Adak et al, 1998	Outpatients	28.6376	77.2235	8	Frequent relapse + long latency	Frequent relapse + long latency, Old World	Old World	tropical	Old World, tropical
126_1980	No	NA	360	CQ	Chloroquine	600 mg d0 + 300 mg d1	900 mg	India	Wild - Dehli, India	P14	P14_126	126	1998	Adak et al, 1998	Outpatients	28.6376	77.2235	8	Frequent relapse + long latency	Frequent relapse + long latency, Old World	Old World	tropical	Old World, tropical
126_1981	No	NA	360	CQ	Chloroquine	600 mg d0 + 300 mg d1	900 mg	India	Wild - Dehli, India	P14	P14_126	126	1998	Adak et al, 1998	Outpatients	28.6376	77.2235	8	Frequent relapse + long latency	Frequent relapse + long latency, Old World	Old World	tropical	Old World, tropical
126_1982	No	NA	360	CQ	Chloroquine	600 mg d0 + 300 mg d1	900 mg	India	Wild - Dehli, India	P14	P14_126	126	1998	Adak et al, 1998	Outpatients	28.6376	77.2235	8	Frequent relapse + long latency	Frequent relapse + long latency, Old World	Old World	tropical	Old World, tropical
126_1983	No	NA	360	CQ	Chloroquine	600 mg d0 + 300 mg d1	900 mg	India	Wild - Dehli, India	P14	P14_126	126	1998	Adak et al, 1998	Outpatients	28.6376	77.2235	8	Frequent relapse + long latency	Frequent relapse + long latency, Old World	Old World	tropical	Old World, tropical
126_1984	No	NA	360	CQ	Chloroquine	600 mg d0 + 300 mg d1	900 mg	India	Wild - Dehli, India	P14	P14_126	126	1998	Adak et al, 1998	Outpatients	28.6376	77.2235	8	Frequent relapse + long latency	Frequent relapse + long latency, Old World	Old World	tropical	Old World, tropical
126_1985	No	NA	360	CQ	Chloroquine	600 mg d0 + 300 mg d1	900 mg	India	Wild - Dehli, India	P14	P14_126	126	1998	Adak et al, 1998	Outpatients	28.6376	77.2235	8	Frequent relapse + long latency	Frequent relapse + long latency, Old World	Old World	tropical	Old World, tropical
126_1986	No	NA	360	CQ	Chloroquine	600 mg d0 + 300 mg d1	900 mg	India	Wild - Dehli, India	P14	P14_126	126	1998	Adak et al, 1998	Outpatients	28.6376	77.2235	8	Frequent relapse + long latency	Frequent relapse + long latency, Old World	Old World	tropical	Old World, tropical
126_1987	No	NA	360	CQ	Chloroquine	600 mg d0 + 300 mg d1	900 mg	India	Wild - Dehli, India	P14	P14_126	126	1998	Adak et al, 1998	Outpatients	28.6376	77.2235	8	Frequent relapse + long latency	Frequent relapse + long latency, Old World	Old World	tropical	Old World, tropical
126_1988	No	NA	360	CQ	Chloroquine	600 mg d0 + 300 mg d1	900 mg	India	Wild - Dehli, India	P14	P14_126	126	1998	Adak et al, 1998	Outpatients	28.6376	77.2235	8	Frequent relapse + long latency	Frequent relapse + long latency, Old World	Old World	tropical	Old World, tropical
126_1989	No	NA	360	CQ	Chloroquine	600 mg d0 + 300 mg d1	900 mg	India	Wild - Dehli, India	P14	P14_126	126	1998	Adak et al, 1998	Outpatients	28.6376	77.2235	8	Frequent relapse + long latency	Frequent relapse + long latency, Old World	Old World	tropical	Old World, tropical
126_199	Yes	90	90	CQ	Chloroquine	600 mg d0 + 300 mg d1	900 mg	India	Wild - Dehli, India	P14	P14_126	126	1998	Adak et al, 1998	Outpatients	28.6376	77.2235	8	Frequent relapse + long latency	Frequent relapse + long latency, Old World	Old World	tropical	Old World, tropical
126_1990	No	NA	360	CQ	Chloroquine	600 mg d0 + 300 mg d1	900 mg	India	Wild - Dehli, India	P14	P14_126	126	1998	Adak et al, 1998	Outpatients	28.6376	77.2235	8	Frequent relapse + long latency	Frequent relapse + long latency, Old World	Old World	tropical	Old World, tropical
126_1991	No	NA	360	CQ	Chloroquine	600 mg d0 + 300 mg d1	900 mg	India	Wild - Dehli, India	P14	P14_126	126	1998	Adak et al, 1998	Outpatients	28.6376	77.2235	8	Frequent relapse + long latency	Frequent relapse + long latency, Old World	Old World	tropical	Old World, tropical
126_1992	No	NA	360	CQ	Chloroquine	600 mg d0 + 300 mg d1	900 mg	India	Wild - Dehli, India	P14	P14_126	126	1998	Adak et al, 1998	Outpatients	28.6376	77.2235	8	Frequent relapse + long latency	Frequent relapse + long latency, Old World	Old World	tropical	Old World, tropical
126_1993	No	NA	360	CQ	Chloroquine	600 mg d0 + 300 mg d1	900 mg	India	Wild - Dehli, India	P14	P14_126	126	1998	Adak et al, 1998	Outpatients	28.6376	77.2235	8	Frequent relapse + long latency	Frequent relapse + long latency, Old World	Old World	tropical	Old World, tropical
126_1994	No	NA	360	CQ	Chloroquine	600 mg d0 + 300 mg d1	900 mg	India	Wild - Dehli, India	P14	P14_126	126	1998	Adak et al, 1998	Outpatients	28.6376	77.2235	8	Frequent relapse + long latency	Frequent relapse + long latency, Old World	Old World	tropical	Old World, tropical
126_1995	No	NA	360	CQ	Chloroquine	600 mg d0 + 300 mg d1	900 mg	India	Wild - Dehli, India	P14	P14_126	126	1998	Adak et al, 1998	Outpatients	28.6376	77.2235	8	Frequent relapse + long latency	Frequent relapse + long latency, Old World	Old World	tropical	Old World, tropical
126_1996	No	NA	360	CQ	Chloroquine	600 mg d0 + 300 mg d1	900 mg	India	Wild - Dehli, India	P14	P14_126	126	1998	Adak et al, 1998	Outpatients	28.6376	77.2235	8	Frequent relapse + long latency	Frequent relapse + long latency, Old World	Old World	tropical	Old World, tropical
126_1997	No	NA	360	CQ	Chloroquine	600 mg d0 + 300 mg d1	900 mg	India	Wild - Dehli, India	P14	P14_126	126	1998	Adak et al, 1998	Outpatients	28.6376	77.2235	8	Frequent relapse + long latency	Frequent relapse + long latency, Old World	Old World	tropical	Old World, tropical
126_1998	No	NA	360	CQ	Chloroquine	600 mg d0 + 300 mg d1	900 mg	India	Wild - Dehli, India	P14	P14_126	126	1998	Adak et al, 1998	Outpatients	28.6376	77.2235	8	Frequent relapse + long latency	Frequent relapse + long latency, Old World	Old World	tropical	Old World, tropical
126_1999	No	NA	360	CQ	Chloroquine	600 mg d0 + 300 mg d1	900 mg	India	Wild - Dehli, India	P14	P14_126	126	1998	Adak et al, 1998	Outpatients	28.6376	77.2235	8	Frequent relapse + long latency	Frequent relapse + long latency, Old World	Old World	tropical	Old World, tropical
126_20	Yes	30	30	CQ	Chloroquine	600 mg d0 + 300 mg d1	900 mg	India	Wild - Dehli, India	P14	P14_126	126	1998	Adak et al, 1998	Outpatients	28.6376	77.2235	8	Frequent relapse + long latency	Frequent relapse + long latency, Old World	Old World	tropical	Old World, tropical
126_200	Yes	90	90	CQ	Chloroquine	600 mg d0 + 300 mg d1	900 mg	India	Wild - Dehli, India	P14	P14_126	126	1998	Adak et al, 1998	Outpatients	28.6376	77.2235	8	Frequent relapse + long latency	Frequent relapse + long latency, Old World	Old World	tropical	Old World, tropical
126_2000	No	NA	360	CQ	Chloroquine	600 mg d0 + 300 mg d1	900 mg	India	Wild - Dehli, India	P14	P14_126	126	1998	Adak et al, 1998	Outpatients	28.6376	77.2235	8	Frequent relapse + long latency	Frequent relapse + long latency, Old World	Old World	tropical	Old World, tropical
126_2001	No	NA	360	CQ	Chloroquine	600 mg d0 + 300 mg d1	900 mg	India	Wild - Dehli, India	P14	P14_126	126	1998	Adak et al, 1998	Outpatients	28.6376	77.2235	8	Frequent relapse + long latency	Frequent relapse + long latency, Old World	Old World	tropical	Old World, tropical
126_2002	No	NA	360	CQ	Chloroquine	600 mg d0 + 300 mg d1	900 mg	India	Wild - Dehli, India	P14	P14_126	126	1998	Adak et al, 1998	Outpatients	28.6376	77.2235	8	Frequent relapse + long latency	Frequent relapse + long latency, Old World	Old World	tropical	Old World, tropical
126_2003	No	NA	360	CQ	Chloroquine	600 mg d0 + 300 mg d1	900 mg	India	Wild - Dehli, India	P14	P14_126	126	1998	Adak et al, 1998	Outpatients	28.6376	77.2235	8	Frequent relapse + long latency	Frequent relapse + long latency, Old World	Old World	tropical	Old World, tropical
126_2004	No	NA	360	CQ	Chloroquine	600 mg d0 + 300 mg d1	900 mg	India	Wild - Dehli, India	P14	P14_126	126	1998	Adak et al, 1998	Outpatients	28.6376	77.2235	8	Frequent relapse + long latency	Frequent relapse + long latency, Old World	Old World	tropical	Old World, tropical
126_2005	No	NA	360	CQ	Chloroquine	600 mg d0 + 300 mg d1	900 mg	India	Wild - Dehli, India	P14	P14_126	126	1998	Adak et al, 1998	Outpatients	28.6376	77.2235	8	Frequent relapse + long latency	Frequent relapse + long latency, Old World	Old World	tropical	Old World, tropical
126_2006	No	NA	360	CQ	Chloroquine	600 mg d0 + 300 mg d1	900 mg	India	Wild - Dehli, India	P14	P14_126	126	1998	Adak et al, 1998	Outpatients	28.6376	77.2235	8	Frequent relapse + long latency	Frequent relapse + long latency, Old World	Old World	tropical	Old World, tropical
126_2007	No	NA	360	CQ	Chloroquine	600 mg d0 + 300 mg d1	900 mg	India	Wild - Dehli, India	P14	P14_126	126	1998	Adak et al, 1998	Outpatients	28.6376	77.2235	8	Frequent relapse + long latency	Frequent relapse + long latency, Old World	Old World	tropical	Old World, tropical
126_2008	No	NA	360	CQ	Chloroquine	600 mg d0 + 300 mg d1	900 mg	India	Wild - Dehli, India	P14	P14_126	126	1998	Adak et al, 1998	Outpatients	28.6376	77.2235	8	Frequent relapse + long latency	Frequent relapse + long latency, Old World	Old World	tropical	Old World, tropical
126_2009	No	NA	360	CQ	Chloroquine	600 mg d0 + 300 mg d1	900 mg	India	Wild - Dehli, India	P14	P14_126	126	1998	Adak et al, 1998	Outpatients	28.6376	77.2235	8	Frequent relapse + long latency	Frequent relapse + long latency, Old World	Old World	tropical	Old World, tropical
126_201	Yes	90	90	CQ	Chloroquine	600 mg d0 + 300 mg d1	900 mg	India	Wild - Dehli, India	P14	P14_126	126	1998	Adak et al, 1998	Outpatients	28.6376	77.2235	8	Frequent relapse + long latency	Frequent relapse + long latency, Old World	Old World	tropical	Old World, tropical
126_2010	No	NA	360	CQ	Chloroquine	600 mg d0 + 300 mg d1	900 mg	India	Wild - Dehli, India	P14	P14_126	126	1998	Adak et al, 1998	Outpatients	28.6376	77.2235	8	Frequent relapse + long latency	Frequent relapse + long latency, Old World	Old World	tropical	Old World, tropical
126_2011	No	NA	360	CQ	Chloroquine	600 mg d0 + 300 mg d1	900 mg	India	Wild - Dehli, India	P14	P14_126	126	1998	Adak et al, 1998	Outpatients	28.6376	77.2235	8	Frequent relapse + long latency	Frequent relapse + long latency, Old World	Old World	tropical	Old World, tropical
126_2012	No	NA	360	CQ	Chloroquine	600 mg d0 + 300 mg d1	900 mg	India	Wild - Dehli, India	P14	P14_126	126	1998	Adak et al, 1998	Outpatients	28.6376	77.2235	8	Frequent relapse + long latency	Frequent relapse + long latency, Old World	Old World	tropical	Old World, tropical
126_2013	No	NA	360	CQ	Chloroquine	600 mg d0 + 300 mg d1	900 mg	India	Wild - Dehli, India	P14	P14_126	126	1998	Adak et al, 1998	Outpatients	28.6376	77.2235	8	Frequent relapse + long latency	Frequent relapse + long latency, Old World	Old World	tropical	Old World, tropical
126_2014	No	NA	360	CQ	Chloroquine	600 mg d0 + 300 mg d1	900 mg	India	Wild - Dehli, India	P14	P14_126	126	1998	Adak et al, 1998	Outpatients	28.6376	77.2235	8	Frequent relapse + long latency	Frequent relapse + long latency, Old World	Old World	tropical	Old World, tropical
126_2015	No	NA	360	CQ	Chloroquine	600 mg d0 + 300 mg d1	900 mg	India	Wild - Dehli, India	P14	P14_126	126	1998	Adak et al, 1998	Outpatients	28.6376	77.2235	8	Frequent relapse + long latency	Frequent relapse + long latency, Old World	Old World	tropical	Old World, tropical
126_2016	No	NA	360	CQ	Chloroquine	600 mg d0 + 300 mg d1	900 mg	India	Wild - Dehli, India	P14	P14_126	126	1998	Adak et al, 1998	Outpatients	28.6376	77.2235	8	Frequent relapse + long latency	Frequent relapse + long latency, Old World	Old World	tropical	Old World, tropical
126_2017	No	NA	360	CQ	Chloroquine	600 mg d0 + 300 mg d1	900 mg	India	Wild - Dehli, India	P14	P14_126	126	1998	Adak et al, 1998	Outpatients	28.6376	77.2235	8	Frequent relapse + long latency	Frequent relapse + long latency, Old World	Old World	tropical	Old World, tropical
126_2018	No	NA	360	CQ	Chloroquine	600 mg d0 + 300 mg d1	900 mg	India	Wild - Dehli, India	P14	P14_126	126	1998	Adak et al, 1998	Outpatients	28.6376	77.2235	8	Frequent relapse + long latency	Frequent relapse + long latency, Old World	Old World	tropical	Old World, tropical
126_2019	No	NA	360	CQ	Chloroquine	600 mg d0 + 300 mg d1	900 mg	India	Wild - Dehli, India	P14	P14_126	126	1998	Adak et al, 1998	Outpatients	28.6376	77.2235	8	Frequent relapse + long latency	Frequent relapse + long latency, Old World	Old World	tropical	Old World, tropical
126_202	Yes	90	90	CQ	Chloroquine	600 mg d0 + 300 mg d1	900 mg	India	Wild - Dehli, India	P14	P14_126	126	1998	Adak et al, 1998	Outpatients	28.6376	77.2235	8	Frequent relapse + long latency	Frequent relapse + long latency, Old World	Old World	tropical	Old World, tropical
126_2020	No	NA	360	CQ	Chloroquine	600 mg d0 + 300 mg d1	900 mg	India	Wild - Dehli, India	P14	P14_126	126	1998	Adak et al, 1998	Outpatients	28.6376	77.2235	8	Frequent relapse + long latency	Frequent relapse + long latency, Old World	Old World	tropical	Old World, tropical
126_2021	No	NA	360	CQ	Chloroquine	600 mg d0 + 300 mg d1	900 mg	India	Wild - Dehli, India	P14	P14_126	126	1998	Adak et al, 1998	Outpatients	28.6376	77.2235	8	Frequent relapse + long latency	Frequent relapse + long latency, Old World	Old World	tropical	Old World, tropical
126_2022	No	NA	360	CQ	Chloroquine	600 mg d0 + 300 mg d1	900 mg	India	Wild - Dehli, India	P14	P14_126	126	1998	Adak et al, 1998	Outpatients	28.6376	77.2235	8	Frequent relapse + long latency	Frequent relapse + long latency, Old World	Old World	tropical	Old World, tropical
126_2023	No	NA	360	CQ	Chloroquine	600 mg d0 + 300 mg d1	900 mg	India	Wild - Dehli, India	P14	P14_126	126	1998	Adak et al, 1998	Outpatients	28.6376	77.2235	8	Frequent relapse + long latency	Frequent relapse + long latency, Old World	Old World	tropical	Old World, tropical
126_2024	No	NA	360	CQ	Chloroquine	600 mg d0 + 300 mg d1	900 mg	India	Wild - Dehli, India	P14	P14_126	126	1998	Adak et al, 1998	Outpatients	28.6376	77.2235	8	Frequent relapse + long latency	Frequent relapse + long latency, Old World	Old World	tropical	Old World, tropical
126_2025	No	NA	360	CQ	Chloroquine	600 mg d0 + 300 mg d1	900 mg	India	Wild - Dehli, India	P14	P14_126	126	1998	Adak et al, 1998	Outpatients	28.6376	77.2235	8	Frequent relapse + long latency	Frequent relapse + long latency, Old World	Old World	tropical	Old World, tropical
126_2026	No	NA	360	CQ	Chloroquine	600 mg d0 + 300 mg d1	900 mg	India	Wild - Dehli, India	P14	P14_126	126	1998	Adak et al, 1998	Outpatients	28.6376	77.2235	8	Frequent relapse + long latency	Frequent relapse + long latency, Old World	Old World	tropical	Old World, tropical
126_2027	No	NA	360	CQ	Chloroquine	600 mg d0 + 300 mg d1	900 mg	India	Wild - Dehli, India	P14	P14_126	126	1998	Adak et al, 1998	Outpatients	28.6376	77.2235	8	Frequent relapse + long latency	Frequent relapse + long latency, Old World	Old World	tropical	Old World, tropical
126_2028	No	NA	360	CQ	Chloroquine	600 mg d0 + 300 mg d1	900 mg	India	Wild - Dehli, India	P14	P14_126	126	1998	Adak et al, 1998	Outpatients	28.6376	77.2235	8	Frequent relapse + long latency	Frequent relapse + long latency, Old World	Old World	tropical	Old World, tropical
126_2029	No	NA	360	CQ	Chloroquine	600 mg d0 + 300 mg d1	900 mg	India	Wild - Dehli, India	P14	P14_126	126	1998	Adak et al, 1998	Outpatients	28.6376	77.2235	8	Frequent relapse + long latency	Frequent relapse + long latency, Old World	Old World	tropical	Old World, tropical
126_203	Yes	90	90	CQ	Chloroquine	600 mg d0 + 300 mg d1	900 mg	India	Wild - Dehli, India	P14	P14_126	126	1998	Adak et al, 1998	Outpatients	28.6376	77.2235	8	Frequent relapse + long latency	Frequent relapse + long latency, Old World	Old World	tropical	Old World, tropical
126_2030	No	NA	360	CQ	Chloroquine	600 mg d0 + 300 mg d1	900 mg	India	Wild - Dehli, India	P14	P14_126	126	1998	Adak et al, 1998	Outpatients	28.6376	77.2235	8	Frequent relapse + long latency	Frequent relapse + long latency, Old World	Old World	tropical	Old World, tropical
126_2031	No	NA	360	CQ	Chloroquine	600 mg d0 + 300 mg d1	900 mg	India	Wild - Dehli, India	P14	P14_126	126	1998	Adak et al, 1998	Outpatients	28.6376	77.2235	8	Frequent relapse + long latency	Frequent relapse + long latency, Old World	Old World	tropical	Old World, tropical
126_2032	No	NA	360	CQ	Chloroquine	600 mg d0 + 300 mg d1	900 mg	India	Wild - Dehli, India	P14	P14_126	126	1998	Adak et al, 1998	Outpatients	28.6376	77.2235	8	Frequent relapse + long latency	Frequent relapse + long latency, Old World	Old World	tropical	Old World, tropical
126_2033	No	NA	360	CQ	Chloroquine	600 mg d0 + 300 mg d1	900 mg	India	Wild - Dehli, India	P14	P14_126	126	1998	Adak et al, 1998	Outpatients	28.6376	77.2235	8	Frequent relapse + long latency	Frequent relapse + long latency, Old World	Old World	tropical	Old World, tropical
126_2034	No	NA	360	CQ	Chloroquine	600 mg d0 + 300 mg d1	900 mg	India	Wild - Dehli, India	P14	P14_126	126	1998	Adak et al, 1998	Outpatients	28.6376	77.2235	8	Frequent relapse + long latency	Frequent relapse + long latency, Old World	Old World	tropical	Old World, tropical
126_2035	No	NA	360	CQ	Chloroquine	600 mg d0 + 300 mg d1	900 mg	India	Wild - Dehli, India	P14	P14_126	126	1998	Adak et al, 1998	Outpatients	28.6376	77.2235	8	Frequent relapse + long latency	Frequent relapse + long latency, Old World	Old World	tropical	Old World, tropical
126_2036	No	NA	360	CQ	Chloroquine	600 mg d0 + 300 mg d1	900 mg	India	Wild - Dehli, India	P14	P14_126	126	1998	Adak et al, 1998	Outpatients	28.6376	77.2235	8	Frequent relapse + long latency	Frequent relapse + long latency, Old World	Old World	tropical	Old World, tropical
126_2037	No	NA	360	CQ	Chloroquine	600 mg d0 + 300 mg d1	900 mg	India	Wild - Dehli, India	P14	P14_126	126	1998	Adak et al, 1998	Outpatients	28.6376	77.2235	8	Frequent relapse + long latency	Frequent relapse + long latency, Old World	Old World	tropical	Old World, tropical
126_2038	No	NA	360	CQ	Chloroquine	600 mg d0 + 300 mg d1	900 mg	India	Wild - Dehli, India	P14	P14_126	126	1998	Adak et al, 1998	Outpatients	28.6376	77.2235	8	Frequent relapse + long latency	Frequent relapse + long latency, Old World	Old World	tropical	Old World, tropical
126_2039	No	NA	360	CQ	Chloroquine	600 mg d0 + 300 mg d1	900 mg	India	Wild - Dehli, India	P14	P14_126	126	1998	Adak et al, 1998	Outpatients	28.6376	77.2235	8	Frequent relapse + long latency	Frequent relapse + long latency, Old World	Old World	tropical	Old World, tropical
126_204	Yes	120	120	CQ	Chloroquine	600 mg d0 + 300 mg d1	900 mg	India	Wild - Dehli, India	P14	P14_126	126	1998	Adak et al, 1998	Outpatients	28.6376	77.2235	8	Frequent relapse + long latency	Frequent relapse + long latency, Old World	Old World	tropical	Old World, tropical
126_2040	No	NA	360	CQ	Chloroquine	600 mg d0 + 300 mg d1	900 mg	India	Wild - Dehli, India	P14	P14_126	126	1998	Adak et al, 1998	Outpatients	28.6376	77.2235	8	Frequent relapse + long latency	Frequent relapse + long latency, Old World	Old World	tropical	Old World, tropical
126_2041	No	NA	360	CQ	Chloroquine	600 mg d0 + 300 mg d1	900 mg	India	Wild - Dehli, India	P14	P14_126	126	1998	Adak et al, 1998	Outpatients	28.6376	77.2235	8	Frequent relapse + long latency	Frequent relapse + long latency, Old World	Old World	tropical	Old World, tropical
126_2042	No	NA	360	CQ	Chloroquine	600 mg d0 + 300 mg d1	900 mg	India	Wild - Dehli, India	P14	P14_126	126	1998	Adak et al, 1998	Outpatients	28.6376	77.2235	8	Frequent relapse + long latency	Frequent relapse + long latency, Old World	Old World	tropical	Old World, tropical
126_2043	No	NA	360	CQ	Chloroquine	600 mg d0 + 300 mg d1	900 mg	India	Wild - Dehli, India	P14	P14_126	126	1998	Adak et al, 1998	Outpatients	28.6376	77.2235	8	Frequent relapse + long latency	Frequent relapse + long latency, Old World	Old World	tropical	Old World, tropical
126_2044	No	NA	360	CQ	Chloroquine	600 mg d0 + 300 mg d1	900 mg	India	Wild - Dehli, India	P14	P14_126	126	1998	Adak et al, 1998	Outpatients	28.6376	77.2235	8	Frequent relapse + long latency	Frequent relapse + long latency, Old World	Old World	tropical	Old World, tropical
126_2045	No	NA	360	CQ	Chloroquine	600 mg d0 + 300 mg d1	900 mg	India	Wild - Dehli, India	P14	P14_126	126	1998	Adak et al, 1998	Outpatients	28.6376	77.2235	8	Frequent relapse + long latency	Frequent relapse + long latency, Old World	Old World	tropical	Old World, tropical
126_2046	No	NA	360	CQ	Chloroquine	600 mg d0 + 300 mg d1	900 mg	India	Wild - Dehli, India	P14	P14_126	126	1998	Adak et al, 1998	Outpatients	28.6376	77.2235	8	Frequent relapse + long latency	Frequent relapse + long latency, Old World	Old World	tropical	Old World, tropical
126_2047	No	NA	360	CQ	Chloroquine	600 mg d0 + 300 mg d1	900 mg	India	Wild - Dehli, India	P14	P14_126	126	1998	Adak et al, 1998	Outpatients	28.6376	77.2235	8	Frequent relapse + long latency	Frequent relapse + long latency, Old World	Old World	tropical	Old World, tropical
126_2048	No	NA	360	CQ	Chloroquine	600 mg d0 + 300 mg d1	900 mg	India	Wild - Dehli, India	P14	P14_126	126	1998	Adak et al, 1998	Outpatients	28.6376	77.2235	8	Frequent relapse + long latency	Frequent relapse + long latency, Old World	Old World	tropical	Old World, tropical
126_2049	No	NA	360	CQ	Chloroquine	600 mg d0 + 300 mg d1	900 mg	India	Wild - Dehli, India	P14	P14_126	126	1998	Adak et al, 1998	Outpatients	28.6376	77.2235	8	Frequent relapse + long latency	Frequent relapse + long latency, Old World	Old World	tropical	Old World, tropical
126_205	Yes	120	120	CQ	Chloroquine	600 mg d0 + 300 mg d1	900 mg	India	Wild - Dehli, India	P14	P14_126	126	1998	Adak et al, 1998	Outpatients	28.6376	77.2235	8	Frequent relapse + long latency	Frequent relapse + long latency, Old World	Old World	tropical	Old World, tropical
126_2050	No	NA	360	CQ	Chloroquine	600 mg d0 + 300 mg d1	900 mg	India	Wild - Dehli, India	P14	P14_126	126	1998	Adak et al, 1998	Outpatients	28.6376	77.2235	8	Frequent relapse + long latency	Frequent relapse + long latency, Old World	Old World	tropical	Old World, tropical
126_2051	No	NA	360	CQ	Chloroquine	600 mg d0 + 300 mg d1	900 mg	India	Wild - Dehli, India	P14	P14_126	126	1998	Adak et al, 1998	Outpatients	28.6376	77.2235	8	Frequent relapse + long latency	Frequent relapse + long latency, Old World	Old World	tropical	Old World, tropical
126_2052	No	NA	360	CQ	Chloroquine	600 mg d0 + 300 mg d1	900 mg	India	Wild - Dehli, India	P14	P14_126	126	1998	Adak et al, 1998	Outpatients	28.6376	77.2235	8	Frequent relapse + long latency	Frequent relapse + long latency, Old World	Old World	tropical	Old World, tropical
126_2053	No	NA	360	CQ	Chloroquine	600 mg d0 + 300 mg d1	900 mg	India	Wild - Dehli, India	P14	P14_126	126	1998	Adak et al, 1998	Outpatients	28.6376	77.2235	8	Frequent relapse + long latency	Frequent relapse + long latency, Old World	Old World	tropical	Old World, tropical
126_2054	No	NA	360	CQ	Chloroquine	600 mg d0 + 300 mg d1	900 mg	India	Wild - Dehli, India	P14	P14_126	126	1998	Adak et al, 1998	Outpatients	28.6376	77.2235	8	Frequent relapse + long latency	Frequent relapse + long latency, Old World	Old World	tropical	Old World, tropical
126_2055	No	NA	360	CQ	Chloroquine	600 mg d0 + 300 mg d1	900 mg	India	Wild - Dehli, India	P14	P14_126	126	1998	Adak et al, 1998	Outpatients	28.6376	77.2235	8	Frequent relapse + long latency	Frequent relapse + long latency, Old World	Old World	tropical	Old World, tropical
126_2056	No	NA	360	CQ	Chloroquine	600 mg d0 + 300 mg d1	900 mg	India	Wild - Dehli, India	P14	P14_126	126	1998	Adak et al, 1998	Outpatients	28.6376	77.2235	8	Frequent relapse + long latency	Frequent relapse + long latency, Old World	Old World	tropical	Old World, tropical
126_2057	No	NA	360	CQ	Chloroquine	600 mg d0 + 300 mg d1	900 mg	India	Wild - Dehli, India	P14	P14_126	126	1998	Adak et al, 1998	Outpatients	28.6376	77.2235	8	Frequent relapse + long latency	Frequent relapse + long latency, Old World	Old World	tropical	Old World, tropical
126_2058	No	NA	360	CQ	Chloroquine	600 mg d0 + 300 mg d1	900 mg	India	Wild - Dehli, India	P14	P14_126	126	1998	Adak et al, 1998	Outpatients	28.6376	77.2235	8	Frequent relapse + long latency	Frequent relapse + long latency, Old World	Old World	tropical	Old World, tropical
126_2059	No	NA	360	CQ	Chloroquine	600 mg d0 + 300 mg d1	900 mg	India	Wild - Dehli, India	P14	P14_126	126	1998	Adak et al, 1998	Outpatients	28.6376	77.2235	8	Frequent relapse + long latency	Frequent relapse + long latency, Old World	Old World	tropical	Old World, tropical
126_206	Yes	120	120	CQ	Chloroquine	600 mg d0 + 300 mg d1	900 mg	India	Wild - Dehli, India	P14	P14_126	126	1998	Adak et al, 1998	Outpatients	28.6376	77.2235	8	Frequent relapse + long latency	Frequent relapse + long latency, Old World	Old World	tropical	Old World, tropical
126_2060	No	NA	360	CQ	Chloroquine	600 mg d0 + 300 mg d1	900 mg	India	Wild - Dehli, India	P14	P14_126	126	1998	Adak et al, 1998	Outpatients	28.6376	77.2235	8	Frequent relapse + long latency	Frequent relapse + long latency, Old World	Old World	tropical	Old World, tropical
126_2061	No	NA	360	CQ	Chloroquine	600 mg d0 + 300 mg d1	900 mg	India	Wild - Dehli, India	P14	P14_126	126	1998	Adak et al, 1998	Outpatients	28.6376	77.2235	8	Frequent relapse + long latency	Frequent relapse + long latency, Old World	Old World	tropical	Old World, tropical
126_2062	No	NA	360	CQ	Chloroquine	600 mg d0 + 300 mg d1	900 mg	India	Wild - Dehli, India	P14	P14_126	126	1998	Adak et al, 1998	Outpatients	28.6376	77.2235	8	Frequent relapse + long latency	Frequent relapse + long latency, Old World	Old World	tropical	Old World, tropical
126_2063	No	NA	360	CQ	Chloroquine	600 mg d0 + 300 mg d1	900 mg	India	Wild - Dehli, India	P14	P14_126	126	1998	Adak et al, 1998	Outpatients	28.6376	77.2235	8	Frequent relapse + long latency	Frequent relapse + long latency, Old World	Old World	tropical	Old World, tropical
126_2064	No	NA	360	CQ	Chloroquine	600 mg d0 + 300 mg d1	900 mg	India	Wild - Dehli, India	P14	P14_126	126	1998	Adak et al, 1998	Outpatients	28.6376	77.2235	8	Frequent relapse + long latency	Frequent relapse + long latency, Old World	Old World	tropical	Old World, tropical
126_2065	No	NA	360	CQ	Chloroquine	600 mg d0 + 300 mg d1	900 mg	India	Wild - Dehli, India	P14	P14_126	126	1998	Adak et al, 1998	Outpatients	28.6376	77.2235	8	Frequent relapse + long latency	Frequent relapse + long latency, Old World	Old World	tropical	Old World, tropical
126_2066	No	NA	360	CQ	Chloroquine	600 mg d0 + 300 mg d1	900 mg	India	Wild - Dehli, India	P14	P14_126	126	1998	Adak et al, 1998	Outpatients	28.6376	77.2235	8	Frequent relapse + long latency	Frequent relapse + long latency, Old World	Old World	tropical	Old World, tropical
126_2067	No	NA	360	CQ	Chloroquine	600 mg d0 + 300 mg d1	900 mg	India	Wild - Dehli, India	P14	P14_126	126	1998	Adak et al, 1998	Outpatients	28.6376	77.2235	8	Frequent relapse + long latency	Frequent relapse + long latency, Old World	Old World	tropical	Old World, tropical
126_2068	No	NA	360	CQ	Chloroquine	600 mg d0 + 300 mg d1	900 mg	India	Wild - Dehli, India	P14	P14_126	126	1998	Adak et al, 1998	Outpatients	28.6376	77.2235	8	Frequent relapse + long latency	Frequent relapse + long latency, Old World	Old World	tropical	Old World, tropical
126_2069	No	NA	360	CQ	Chloroquine	600 mg d0 + 300 mg d1	900 mg	India	Wild - Dehli, India	P14	P14_126	126	1998	Adak et al, 1998	Outpatients	28.6376	77.2235	8	Frequent relapse + long latency	Frequent relapse + long latency, Old World	Old World	tropical	Old World, tropical
126_207	Yes	120	120	CQ	Chloroquine	600 mg d0 + 300 mg d1	900 mg	India	Wild - Dehli, India	P14	P14_126	126	1998	Adak et al, 1998	Outpatients	28.6376	77.2235	8	Frequent relapse + long latency	Frequent relapse + long latency, Old World	Old World	tropical	Old World, tropical
126_2070	No	NA	360	CQ	Chloroquine	600 mg d0 + 300 mg d1	900 mg	India	Wild - Dehli, India	P14	P14_126	126	1998	Adak et al, 1998	Outpatients	28.6376	77.2235	8	Frequent relapse + long latency	Frequent relapse + long latency, Old World	Old World	tropical	Old World, tropical
126_2071	No	NA	360	CQ	Chloroquine	600 mg d0 + 300 mg d1	900 mg	India	Wild - Dehli, India	P14	P14_126	126	1998	Adak et al, 1998	Outpatients	28.6376	77.2235	8	Frequent relapse + long latency	Frequent relapse + long latency, Old World	Old World	tropical	Old World, tropical
126_2072	No	NA	360	CQ	Chloroquine	600 mg d0 + 300 mg d1	900 mg	India	Wild - Dehli, India	P14	P14_126	126	1998	Adak et al, 1998	Outpatients	28.6376	77.2235	8	Frequent relapse + long latency	Frequent relapse + long latency, Old World	Old World	tropical	Old World, tropical
126_2073	No	NA	360	CQ	Chloroquine	600 mg d0 + 300 mg d1	900 mg	India	Wild - Dehli, India	P14	P14_126	126	1998	Adak et al, 1998	Outpatients	28.6376	77.2235	8	Frequent relapse + long latency	Frequent relapse + long latency, Old World	Old World	tropical	Old World, tropical
126_2074	No	NA	360	CQ	Chloroquine	600 mg d0 + 300 mg d1	900 mg	India	Wild - Dehli, India	P14	P14_126	126	1998	Adak et al, 1998	Outpatients	28.6376	77.2235	8	Frequent relapse + long latency	Frequent relapse + long latency, Old World	Old World	tropical	Old World, tropical
126_2075	No	NA	360	CQ	Chloroquine	600 mg d0 + 300 mg d1	900 mg	India	Wild - Dehli, India	P14	P14_126	126	1998	Adak et al, 1998	Outpatients	28.6376	77.2235	8	Frequent relapse + long latency	Frequent relapse + long latency, Old World	Old World	tropical	Old World, tropical
126_2076	No	NA	360	CQ	Chloroquine	600 mg d0 + 300 mg d1	900 mg	India	Wild - Dehli, India	P14	P14_126	126	1998	Adak et al, 1998	Outpatients	28.6376	77.2235	8	Frequent relapse + long latency	Frequent relapse + long latency, Old World	Old World	tropical	Old World, tropical
126_2077	No	NA	360	CQ	Chloroquine	600 mg d0 + 300 mg d1	900 mg	India	Wild - Dehli, India	P14	P14_126	126	1998	Adak et al, 1998	Outpatients	28.6376	77.2235	8	Frequent relapse + long latency	Frequent relapse + long latency, Old World	Old World	tropical	Old World, tropical
126_2078	No	NA	360	CQ	Chloroquine	600 mg d0 + 300 mg d1	900 mg	India	Wild - Dehli, India	P14	P14_126	126	1998	Adak et al, 1998	Outpatients	28.6376	77.2235	8	Frequent relapse + long latency	Frequent relapse + long latency, Old World	Old World	tropical	Old World, tropical
126_2079	No	NA	360	CQ	Chloroquine	600 mg d0 + 300 mg d1	900 mg	India	Wild - Dehli, India	P14	P14_126	126	1998	Adak et al, 1998	Outpatients	28.6376	77.2235	8	Frequent relapse + long latency	Frequent relapse + long latency, Old World	Old World	tropical	Old World, tropical
126_208	Yes	120	120	CQ	Chloroquine	600 mg d0 + 300 mg d1	900 mg	India	Wild - Dehli, India	P14	P14_126	126	1998	Adak et al, 1998	Outpatients	28.6376	77.2235	8	Frequent relapse + long latency	Frequent relapse + long latency, Old World	Old World	tropical	Old World, tropical
126_2080	No	NA	360	CQ	Chloroquine	600 mg d0 + 300 mg d1	900 mg	India	Wild - Dehli, India	P14	P14_126	126	1998	Adak et al, 1998	Outpatients	28.6376	77.2235	8	Frequent relapse + long latency	Frequent relapse + long latency, Old World	Old World	tropical	Old World, tropical
126_2081	No	NA	360	CQ	Chloroquine	600 mg d0 + 300 mg d1	900 mg	India	Wild - Dehli, India	P14	P14_126	126	1998	Adak et al, 1998	Outpatients	28.6376	77.2235	8	Frequent relapse + long latency	Frequent relapse + long latency, Old World	Old World	tropical	Old World, tropical
126_2082	No	NA	360	CQ	Chloroquine	600 mg d0 + 300 mg d1	900 mg	India	Wild - Dehli, India	P14	P14_126	126	1998	Adak et al, 1998	Outpatients	28.6376	77.2235	8	Frequent relapse + long latency	Frequent relapse + long latency, Old World	Old World	tropical	Old World, tropical
126_2083	No	NA	360	CQ	Chloroquine	600 mg d0 + 300 mg d1	900 mg	India	Wild - Dehli, India	P14	P14_126	126	1998	Adak et al, 1998	Outpatients	28.6376	77.2235	8	Frequent relapse + long latency	Frequent relapse + long latency, Old World	Old World	tropical	Old World, tropical
126_2084	No	NA	360	CQ	Chloroquine	600 mg d0 + 300 mg d1	900 mg	India	Wild - Dehli, India	P14	P14_126	126	1998	Adak et al, 1998	Outpatients	28.6376	77.2235	8	Frequent relapse + long latency	Frequent relapse + long latency, Old World	Old World	tropical	Old World, tropical
126_2085	No	NA	360	CQ	Chloroquine	600 mg d0 + 300 mg d1	900 mg	India	Wild - Dehli, India	P14	P14_126	126	1998	Adak et al, 1998	Outpatients	28.6376	77.2235	8	Frequent relapse + long latency	Frequent relapse + long latency, Old World	Old World	tropical	Old World, tropical
126_2086	No	NA	360	CQ	Chloroquine	600 mg d0 + 300 mg d1	900 mg	India	Wild - Dehli, India	P14	P14_126	126	1998	Adak et al, 1998	Outpatients	28.6376	77.2235	8	Frequent relapse + long latency	Frequent relapse + long latency, Old World	Old World	tropical	Old World, tropical
126_2087	No	NA	360	CQ	Chloroquine	600 mg d0 + 300 mg d1	900 mg	India	Wild - Dehli, India	P14	P14_126	126	1998	Adak et al, 1998	Outpatients	28.6376	77.2235	8	Frequent relapse + long latency	Frequent relapse + long latency, Old World	Old World	tropical	Old World, tropical
126_2088	No	NA	360	CQ	Chloroquine	600 mg d0 + 300 mg d1	900 mg	India	Wild - Dehli, India	P14	P14_126	126	1998	Adak et al, 1998	Outpatients	28.6376	77.2235	8	Frequent relapse + long latency	Frequent relapse + long latency, Old World	Old World	tropical	Old World, tropical
126_2089	No	NA	360	CQ	Chloroquine	600 mg d0 + 300 mg d1	900 mg	India	Wild - Dehli, India	P14	P14_126	126	1998	Adak et al, 1998	Outpatients	28.6376	77.2235	8	Frequent relapse + long latency	Frequent relapse + long latency, Old World	Old World	tropical	Old World, tropical
126_209	Yes	120	120	CQ	Chloroquine	600 mg d0 + 300 mg d1	900 mg	India	Wild - Dehli, India	P14	P14_126	126	1998	Adak et al, 1998	Outpatients	28.6376	77.2235	8	Frequent relapse + long latency	Frequent relapse + long latency, Old World	Old World	tropical	Old World, tropical
126_2090	No	NA	360	CQ	Chloroquine	600 mg d0 + 300 mg d1	900 mg	India	Wild - Dehli, India	P14	P14_126	126	1998	Adak et al, 1998	Outpatients	28.6376	77.2235	8	Frequent relapse + long latency	Frequent relapse + long latency, Old World	Old World	tropical	Old World, tropical
126_2091	No	NA	360	CQ	Chloroquine	600 mg d0 + 300 mg d1	900 mg	India	Wild - Dehli, India	P14	P14_126	126	1998	Adak et al, 1998	Outpatients	28.6376	77.2235	8	Frequent relapse + long latency	Frequent relapse + long latency, Old World	Old World	tropical	Old World, tropical
126_2092	No	NA	360	CQ	Chloroquine	600 mg d0 + 300 mg d1	900 mg	India	Wild - Dehli, India	P14	P14_126	126	1998	Adak et al, 1998	Outpatients	28.6376	77.2235	8	Frequent relapse + long latency	Frequent relapse + long latency, Old World	Old World	tropical	Old World, tropical
126_2093	No	NA	360	CQ	Chloroquine	600 mg d0 + 300 mg d1	900 mg	India	Wild - Dehli, India	P14	P14_126	126	1998	Adak et al, 1998	Outpatients	28.6376	77.2235	8	Frequent relapse + long latency	Frequent relapse + long latency, Old World	Old World	tropical	Old World, tropical
126_2094	No	NA	360	CQ	Chloroquine	600 mg d0 + 300 mg d1	900 mg	India	Wild - Dehli, India	P14	P14_126	126	1998	Adak et al, 1998	Outpatients	28.6376	77.2235	8	Frequent relapse + long latency	Frequent relapse + long latency, Old World	Old World	tropical	Old World, tropical
126_2095	No	NA	360	CQ	Chloroquine	600 mg d0 + 300 mg d1	900 mg	India	Wild - Dehli, India	P14	P14_126	126	1998	Adak et al, 1998	Outpatients	28.6376	77.2235	8	Frequent relapse + long latency	Frequent relapse + long latency, Old World	Old World	tropical	Old World, tropical
126_2096	No	NA	360	CQ	Chloroquine	600 mg d0 + 300 mg d1	900 mg	India	Wild - Dehli, India	P14	P14_126	126	1998	Adak et al, 1998	Outpatients	28.6376	77.2235	8	Frequent relapse + long latency	Frequent relapse + long latency, Old World	Old World	tropical	Old World, tropical
126_2097	No	NA	360	CQ	Chloroquine	600 mg d0 + 300 mg d1	900 mg	India	Wild - Dehli, India	P14	P14_126	126	1998	Adak et al, 1998	Outpatients	28.6376	77.2235	8	Frequent relapse + long latency	Frequent relapse + long latency, Old World	Old World	tropical	Old World, tropical
126_2098	No	NA	360	CQ	Chloroquine	600 mg d0 + 300 mg d1	900 mg	India	Wild - Dehli, India	P14	P14_126	126	1998	Adak et al, 1998	Outpatients	28.6376	77.2235	8	Frequent relapse + long latency	Frequent relapse + long latency, Old World	Old World	tropical	Old World, tropical
126_2099	No	NA	360	CQ	Chloroquine	600 mg d0 + 300 mg d1	900 mg	India	Wild - Dehli, India	P14	P14_126	126	1998	Adak et al, 1998	Outpatients	28.6376	77.2235	8	Frequent relapse + long latency	Frequent relapse + long latency, Old World	Old World	tropical	Old World, tropical
126_21	Yes	30	30	CQ	Chloroquine	600 mg d0 + 300 mg d1	900 mg	India	Wild - Dehli, India	P14	P14_126	126	1998	Adak et al, 1998	Outpatients	28.6376	77.2235	8	Frequent relapse + long latency	Frequent relapse + long latency, Old World	Old World	tropical	Old World, tropical
126_210	Yes	120	120	CQ	Chloroquine	600 mg d0 + 300 mg d1	900 mg	India	Wild - Dehli, India	P14	P14_126	126	1998	Adak et al, 1998	Outpatients	28.6376	77.2235	8	Frequent relapse + long latency	Frequent relapse + long latency, Old World	Old World	tropical	Old World, tropical
126_2100	No	NA	360	CQ	Chloroquine	600 mg d0 + 300 mg d1	900 mg	India	Wild - Dehli, India	P14	P14_126	126	1998	Adak et al, 1998	Outpatients	28.6376	77.2235	8	Frequent relapse + long latency	Frequent relapse + long latency, Old World	Old World	tropical	Old World, tropical
126_2101	No	NA	360	CQ	Chloroquine	600 mg d0 + 300 mg d1	900 mg	India	Wild - Dehli, India	P14	P14_126	126	1998	Adak et al, 1998	Outpatients	28.6376	77.2235	8	Frequent relapse + long latency	Frequent relapse + long latency, Old World	Old World	tropical	Old World, tropical
126_2102	No	NA	360	CQ	Chloroquine	600 mg d0 + 300 mg d1	900 mg	India	Wild - Dehli, India	P14	P14_126	126	1998	Adak et al, 1998	Outpatients	28.6376	77.2235	8	Frequent relapse + long latency	Frequent relapse + long latency, Old World	Old World	tropical	Old World, tropical
126_2103	No	NA	360	CQ	Chloroquine	600 mg d0 + 300 mg d1	900 mg	India	Wild - Dehli, India	P14	P14_126	126	1998	Adak et al, 1998	Outpatients	28.6376	77.2235	8	Frequent relapse + long latency	Frequent relapse + long latency, Old World	Old World	tropical	Old World, tropical
126_2104	No	NA	360	CQ	Chloroquine	600 mg d0 + 300 mg d1	900 mg	India	Wild - Dehli, India	P14	P14_126	126	1998	Adak et al, 1998	Outpatients	28.6376	77.2235	8	Frequent relapse + long latency	Frequent relapse + long latency, Old World	Old World	tropical	Old World, tropical
126_2105	No	NA	360	CQ	Chloroquine	600 mg d0 + 300 mg d1	900 mg	India	Wild - Dehli, India	P14	P14_126	126	1998	Adak et al, 1998	Outpatients	28.6376	77.2235	8	Frequent relapse + long latency	Frequent relapse + long latency, Old World	Old World	tropical	Old World, tropical
126_2106	No	NA	360	CQ	Chloroquine	600 mg d0 + 300 mg d1	900 mg	India	Wild - Dehli, India	P14	P14_126	126	1998	Adak et al, 1998	Outpatients	28.6376	77.2235	8	Frequent relapse + long latency	Frequent relapse + long latency, Old World	Old World	tropical	Old World, tropical
126_2107	No	NA	360	CQ	Chloroquine	600 mg d0 + 300 mg d1	900 mg	India	Wild - Dehli, India	P14	P14_126	126	1998	Adak et al, 1998	Outpatients	28.6376	77.2235	8	Frequent relapse + long latency	Frequent relapse + long latency, Old World	Old World	tropical	Old World, tropical
126_2108	No	NA	360	CQ	Chloroquine	600 mg d0 + 300 mg d1	900 mg	India	Wild - Dehli, India	P14	P14_126	126	1998	Adak et al, 1998	Outpatients	28.6376	77.2235	8	Frequent relapse + long latency	Frequent relapse + long latency, Old World	Old World	tropical	Old World, tropical
126_2109	No	NA	360	CQ	Chloroquine	600 mg d0 + 300 mg d1	900 mg	India	Wild - Dehli, India	P14	P14_126	126	1998	Adak et al, 1998	Outpatients	28.6376	77.2235	8	Frequent relapse + long latency	Frequent relapse + long latency, Old World	Old World	tropical	Old World, tropical
126_211	Yes	120	120	CQ	Chloroquine	600 mg d0 + 300 mg d1	900 mg	India	Wild - Dehli, India	P14	P14_126	126	1998	Adak et al, 1998	Outpatients	28.6376	77.2235	8	Frequent relapse + long latency	Frequent relapse + long latency, Old World	Old World	tropical	Old World, tropical
126_2110	No	NA	360	CQ	Chloroquine	600 mg d0 + 300 mg d1	900 mg	India	Wild - Dehli, India	P14	P14_126	126	1998	Adak et al, 1998	Outpatients	28.6376	77.2235	8	Frequent relapse + long latency	Frequent relapse + long latency, Old World	Old World	tropical	Old World, tropical
126_2111	No	NA	360	CQ	Chloroquine	600 mg d0 + 300 mg d1	900 mg	India	Wild - Dehli, India	P14	P14_126	126	1998	Adak et al, 1998	Outpatients	28.6376	77.2235	8	Frequent relapse + long latency	Frequent relapse + long latency, Old World	Old World	tropical	Old World, tropical
126_2112	No	NA	360	CQ	Chloroquine	600 mg d0 + 300 mg d1	900 mg	India	Wild - Dehli, India	P14	P14_126	126	1998	Adak et al, 1998	Outpatients	28.6376	77.2235	8	Frequent relapse + long latency	Frequent relapse + long latency, Old World	Old World	tropical	Old World, tropical
126_2113	No	NA	360	CQ	Chloroquine	600 mg d0 + 300 mg d1	900 mg	India	Wild - Dehli, India	P14	P14_126	126	1998	Adak et al, 1998	Outpatients	28.6376	77.2235	8	Frequent relapse + long latency	Frequent relapse + long latency, Old World	Old World	tropical	Old World, tropical
126_2114	No	NA	360	CQ	Chloroquine	600 mg d0 + 300 mg d1	900 mg	India	Wild - Dehli, India	P14	P14_126	126	1998	Adak et al, 1998	Outpatients	28.6376	77.2235	8	Frequent relapse + long latency	Frequent relapse + long latency, Old World	Old World	tropical	Old World, tropical
126_2115	No	NA	360	CQ	Chloroquine	600 mg d0 + 300 mg d1	900 mg	India	Wild - Dehli, India	P14	P14_126	126	1998	Adak et al, 1998	Outpatients	28.6376	77.2235	8	Frequent relapse + long latency	Frequent relapse + long latency, Old World	Old World	tropical	Old World, tropical
126_2116	No	NA	360	CQ	Chloroquine	600 mg d0 + 300 mg d1	900 mg	India	Wild - Dehli, India	P14	P14_126	126	1998	Adak et al, 1998	Outpatients	28.6376	77.2235	8	Frequent relapse + long latency	Frequent relapse + long latency, Old World	Old World	tropical	Old World, tropical
126_2117	No	NA	360	CQ	Chloroquine	600 mg d0 + 300 mg d1	900 mg	India	Wild - Dehli, India	P14	P14_126	126	1998	Adak et al, 1998	Outpatients	28.6376	77.2235	8	Frequent relapse + long latency	Frequent relapse + long latency, Old World	Old World	tropical	Old World, tropical
126_2118	No	NA	360	CQ	Chloroquine	600 mg d0 + 300 mg d1	900 mg	India	Wild - Dehli, India	P14	P14_126	126	1998	Adak et al, 1998	Outpatients	28.6376	77.2235	8	Frequent relapse + long latency	Frequent relapse + long latency, Old World	Old World	tropical	Old World, tropical
126_2119	No	NA	360	CQ	Chloroquine	600 mg d0 + 300 mg d1	900 mg	India	Wild - Dehli, India	P14	P14_126	126	1998	Adak et al, 1998	Outpatients	28.6376	77.2235	8	Frequent relapse + long latency	Frequent relapse + long latency, Old World	Old World	tropical	Old World, tropical
126_212	Yes	120	120	CQ	Chloroquine	600 mg d0 + 300 mg d1	900 mg	India	Wild - Dehli, India	P14	P14_126	126	1998	Adak et al, 1998	Outpatients	28.6376	77.2235	8	Frequent relapse + long latency	Frequent relapse + long latency, Old World	Old World	tropical	Old World, tropical
126_2120	No	NA	360	CQ	Chloroquine	600 mg d0 + 300 mg d1	900 mg	India	Wild - Dehli, India	P14	P14_126	126	1998	Adak et al, 1998	Outpatients	28.6376	77.2235	8	Frequent relapse + long latency	Frequent relapse + long latency, Old World	Old World	tropical	Old World, tropical
126_2121	No	NA	360	CQ	Chloroquine	600 mg d0 + 300 mg d1	900 mg	India	Wild - Dehli, India	P14	P14_126	126	1998	Adak et al, 1998	Outpatients	28.6376	77.2235	8	Frequent relapse + long latency	Frequent relapse + long latency, Old World	Old World	tropical	Old World, tropical
126_2122	No	NA	360	CQ	Chloroquine	600 mg d0 + 300 mg d1	900 mg	India	Wild - Dehli, India	P14	P14_126	126	1998	Adak et al, 1998	Outpatients	28.6376	77.2235	8	Frequent relapse + long latency	Frequent relapse + long latency, Old World	Old World	tropical	Old World, tropical
126_2123	No	NA	360	CQ	Chloroquine	600 mg d0 + 300 mg d1	900 mg	India	Wild - Dehli, India	P14	P14_126	126	1998	Adak et al, 1998	Outpatients	28.6376	77.2235	8	Frequent relapse + long latency	Frequent relapse + long latency, Old World	Old World	tropical	Old World, tropical
126_2124	No	NA	360	CQ	Chloroquine	600 mg d0 + 300 mg d1	900 mg	India	Wild - Dehli, India	P14	P14_126	126	1998	Adak et al, 1998	Outpatients	28.6376	77.2235	8	Frequent relapse + long latency	Frequent relapse + long latency, Old World	Old World	tropical	Old World, tropical
126_2125	No	NA	360	CQ	Chloroquine	600 mg d0 + 300 mg d1	900 mg	India	Wild - Dehli, India	P14	P14_126	126	1998	Adak et al, 1998	Outpatients	28.6376	77.2235	8	Frequent relapse + long latency	Frequent relapse + long latency, Old World	Old World	tropical	Old World, tropical
126_2126	No	NA	360	CQ	Chloroquine	600 mg d0 + 300 mg d1	900 mg	India	Wild - Dehli, India	P14	P14_126	126	1998	Adak et al, 1998	Outpatients	28.6376	77.2235	8	Frequent relapse + long latency	Frequent relapse + long latency, Old World	Old World	tropical	Old World, tropical
126_2127	No	NA	360	CQ	Chloroquine	600 mg d0 + 300 mg d1	900 mg	India	Wild - Dehli, India	P14	P14_126	126	1998	Adak et al, 1998	Outpatients	28.6376	77.2235	8	Frequent relapse + long latency	Frequent relapse + long latency, Old World	Old World	tropical	Old World, tropical
126_2128	No	NA	360	CQ	Chloroquine	600 mg d0 + 300 mg d1	900 mg	India	Wild - Dehli, India	P14	P14_126	126	1998	Adak et al, 1998	Outpatients	28.6376	77.2235	8	Frequent relapse + long latency	Frequent relapse + long latency, Old World	Old World	tropical	Old World, tropical
126_2129	No	NA	360	CQ	Chloroquine	600 mg d0 + 300 mg d1	900 mg	India	Wild - Dehli, India	P14	P14_126	126	1998	Adak et al, 1998	Outpatients	28.6376	77.2235	8	Frequent relapse + long latency	Frequent relapse + long latency, Old World	Old World	tropical	Old World, tropical
126_213	Yes	120	120	CQ	Chloroquine	600 mg d0 + 300 mg d1	900 mg	India	Wild - Dehli, India	P14	P14_126	126	1998	Adak et al, 1998	Outpatients	28.6376	77.2235	8	Frequent relapse + long latency	Frequent relapse + long latency, Old World	Old World	tropical	Old World, tropical
126_2130	No	NA	360	CQ	Chloroquine	600 mg d0 + 300 mg d1	900 mg	India	Wild - Dehli, India	P14	P14_126	126	1998	Adak et al, 1998	Outpatients	28.6376	77.2235	8	Frequent relapse + long latency	Frequent relapse + long latency, Old World	Old World	tropical	Old World, tropical
126_2131	No	NA	360	CQ	Chloroquine	600 mg d0 + 300 mg d1	900 mg	India	Wild - Dehli, India	P14	P14_126	126	1998	Adak et al, 1998	Outpatients	28.6376	77.2235	8	Frequent relapse + long latency	Frequent relapse + long latency, Old World	Old World	tropical	Old World, tropical
126_2132	No	NA	360	CQ	Chloroquine	600 mg d0 + 300 mg d1	900 mg	India	Wild - Dehli, India	P14	P14_126	126	1998	Adak et al, 1998	Outpatients	28.6376	77.2235	8	Frequent relapse + long latency	Frequent relapse + long latency, Old World	Old World	tropical	Old World, tropical
126_2133	No	NA	360	CQ	Chloroquine	600 mg d0 + 300 mg d1	900 mg	India	Wild - Dehli, India	P14	P14_126	126	1998	Adak et al, 1998	Outpatients	28.6376	77.2235	8	Frequent relapse + long latency	Frequent relapse + long latency, Old World	Old World	tropical	Old World, tropical
126_2134	No	NA	360	CQ	Chloroquine	600 mg d0 + 300 mg d1	900 mg	India	Wild - Dehli, India	P14	P14_126	126	1998	Adak et al, 1998	Outpatients	28.6376	77.2235	8	Frequent relapse + long latency	Frequent relapse + long latency, Old World	Old World	tropical	Old World, tropical
126_2135	No	NA	360	CQ	Chloroquine	600 mg d0 + 300 mg d1	900 mg	India	Wild - Dehli, India	P14	P14_126	126	1998	Adak et al, 1998	Outpatients	28.6376	77.2235	8	Frequent relapse + long latency	Frequent relapse + long latency, Old World	Old World	tropical	Old World, tropical
126_2136	No	NA	360	CQ	Chloroquine	600 mg d0 + 300 mg d1	900 mg	India	Wild - Dehli, India	P14	P14_126	126	1998	Adak et al, 1998	Outpatients	28.6376	77.2235	8	Frequent relapse + long latency	Frequent relapse + long latency, Old World	Old World	tropical	Old World, tropical
126_2137	No	NA	360	CQ	Chloroquine	600 mg d0 + 300 mg d1	900 mg	India	Wild - Dehli, India	P14	P14_126	126	1998	Adak et al, 1998	Outpatients	28.6376	77.2235	8	Frequent relapse + long latency	Frequent relapse + long latency, Old World	Old World	tropical	Old World, tropical
126_2138	No	NA	360	CQ	Chloroquine	600 mg d0 + 300 mg d1	900 mg	India	Wild - Dehli, India	P14	P14_126	126	1998	Adak et al, 1998	Outpatients	28.6376	77.2235	8	Frequent relapse + long latency	Frequent relapse + long latency, Old World	Old World	tropical	Old World, tropical
126_2139	No	NA	360	CQ	Chloroquine	600 mg d0 + 300 mg d1	900 mg	India	Wild - Dehli, India	P14	P14_126	126	1998	Adak et al, 1998	Outpatients	28.6376	77.2235	8	Frequent relapse + long latency	Frequent relapse + long latency, Old World	Old World	tropical	Old World, tropical
126_214	Yes	120	120	CQ	Chloroquine	600 mg d0 + 300 mg d1	900 mg	India	Wild - Dehli, India	P14	P14_126	126	1998	Adak et al, 1998	Outpatients	28.6376	77.2235	8	Frequent relapse + long latency	Frequent relapse + long latency, Old World	Old World	tropical	Old World, tropical
126_2140	No	NA	360	CQ	Chloroquine	600 mg d0 + 300 mg d1	900 mg	India	Wild - Dehli, India	P14	P14_126	126	1998	Adak et al, 1998	Outpatients	28.6376	77.2235	8	Frequent relapse + long latency	Frequent relapse + long latency, Old World	Old World	tropical	Old World, tropical
126_2141	No	NA	360	CQ	Chloroquine	600 mg d0 + 300 mg d1	900 mg	India	Wild - Dehli, India	P14	P14_126	126	1998	Adak et al, 1998	Outpatients	28.6376	77.2235	8	Frequent relapse + long latency	Frequent relapse + long latency, Old World	Old World	tropical	Old World, tropical
126_2142	No	NA	360	CQ	Chloroquine	600 mg d0 + 300 mg d1	900 mg	India	Wild - Dehli, India	P14	P14_126	126	1998	Adak et al, 1998	Outpatients	28.6376	77.2235	8	Frequent relapse + long latency	Frequent relapse + long latency, Old World	Old World	tropical	Old World, tropical
126_2143	No	NA	360	CQ	Chloroquine	600 mg d0 + 300 mg d1	900 mg	India	Wild - Dehli, India	P14	P14_126	126	1998	Adak et al, 1998	Outpatients	28.6376	77.2235	8	Frequent relapse + long latency	Frequent relapse + long latency, Old World	Old World	tropical	Old World, tropical
126_2144	No	NA	360	CQ	Chloroquine	600 mg d0 + 300 mg d1	900 mg	India	Wild - Dehli, India	P14	P14_126	126	1998	Adak et al, 1998	Outpatients	28.6376	77.2235	8	Frequent relapse + long latency	Frequent relapse + long latency, Old World	Old World	tropical	Old World, tropical
126_2145	No	NA	360	CQ	Chloroquine	600 mg d0 + 300 mg d1	900 mg	India	Wild - Dehli, India	P14	P14_126	126	1998	Adak et al, 1998	Outpatients	28.6376	77.2235	8	Frequent relapse + long latency	Frequent relapse + long latency, Old World	Old World	tropical	Old World, tropical
126_2146	No	NA	360	CQ	Chloroquine	600 mg d0 + 300 mg d1	900 mg	India	Wild - Dehli, India	P14	P14_126	126	1998	Adak et al, 1998	Outpatients	28.6376	77.2235	8	Frequent relapse + long latency	Frequent relapse + long latency, Old World	Old World	tropical	Old World, tropical
126_2147	No	NA	360	CQ	Chloroquine	600 mg d0 + 300 mg d1	900 mg	India	Wild - Dehli, India	P14	P14_126	126	1998	Adak et al, 1998	Outpatients	28.6376	77.2235	8	Frequent relapse + long latency	Frequent relapse + long latency, Old World	Old World	tropical	Old World, tropical
126_2148	No	NA	360	CQ	Chloroquine	600 mg d0 + 300 mg d1	900 mg	India	Wild - Dehli, India	P14	P14_126	126	1998	Adak et al, 1998	Outpatients	28.6376	77.2235	8	Frequent relapse + long latency	Frequent relapse + long latency, Old World	Old World	tropical	Old World, tropical
126_2149	No	NA	360	CQ	Chloroquine	600 mg d0 + 300 mg d1	900 mg	India	Wild - Dehli, India	P14	P14_126	126	1998	Adak et al, 1998	Outpatients	28.6376	77.2235	8	Frequent relapse + long latency	Frequent relapse + long latency, Old World	Old World	tropical	Old World, tropical
126_215	Yes	120	120	CQ	Chloroquine	600 mg d0 + 300 mg d1	900 mg	India	Wild - Dehli, India	P14	P14_126	126	1998	Adak et al, 1998	Outpatients	28.6376	77.2235	8	Frequent relapse + long latency	Frequent relapse + long latency, Old World	Old World	tropical	Old World, tropical
126_2150	No	NA	360	CQ	Chloroquine	600 mg d0 + 300 mg d1	900 mg	India	Wild - Dehli, India	P14	P14_126	126	1998	Adak et al, 1998	Outpatients	28.6376	77.2235	8	Frequent relapse + long latency	Frequent relapse + long latency, Old World	Old World	tropical	Old World, tropical
126_2151	No	NA	360	CQ	Chloroquine	600 mg d0 + 300 mg d1	900 mg	India	Wild - Dehli, India	P14	P14_126	126	1998	Adak et al, 1998	Outpatients	28.6376	77.2235	8	Frequent relapse + long latency	Frequent relapse + long latency, Old World	Old World	tropical	Old World, tropical
126_2152	No	NA	360	CQ	Chloroquine	600 mg d0 + 300 mg d1	900 mg	India	Wild - Dehli, India	P14	P14_126	126	1998	Adak et al, 1998	Outpatients	28.6376	77.2235	8	Frequent relapse + long latency	Frequent relapse + long latency, Old World	Old World	tropical	Old World, tropical
126_2153	No	NA	360	CQ	Chloroquine	600 mg d0 + 300 mg d1	900 mg	India	Wild - Dehli, India	P14	P14_126	126	1998	Adak et al, 1998	Outpatients	28.6376	77.2235	8	Frequent relapse + long latency	Frequent relapse + long latency, Old World	Old World	tropical	Old World, tropical
126_2154	No	NA	360	CQ	Chloroquine	600 mg d0 + 300 mg d1	900 mg	India	Wild - Dehli, India	P14	P14_126	126	1998	Adak et al, 1998	Outpatients	28.6376	77.2235	8	Frequent relapse + long latency	Frequent relapse + long latency, Old World	Old World	tropical	Old World, tropical
126_2155	No	NA	360	CQ	Chloroquine	600 mg d0 + 300 mg d1	900 mg	India	Wild - Dehli, India	P14	P14_126	126	1998	Adak et al, 1998	Outpatients	28.6376	77.2235	8	Frequent relapse + long latency	Frequent relapse + long latency, Old World	Old World	tropical	Old World, tropical
126_2156	No	NA	360	CQ	Chloroquine	600 mg d0 + 300 mg d1	900 mg	India	Wild - Dehli, India	P14	P14_126	126	1998	Adak et al, 1998	Outpatients	28.6376	77.2235	8	Frequent relapse + long latency	Frequent relapse + long latency, Old World	Old World	tropical	Old World, tropical
126_2157	No	NA	360	CQ	Chloroquine	600 mg d0 + 300 mg d1	900 mg	India	Wild - Dehli, India	P14	P14_126	126	1998	Adak et al, 1998	Outpatients	28.6376	77.2235	8	Frequent relapse + long latency	Frequent relapse + long latency, Old World	Old World	tropical	Old World, tropical
126_2158	No	NA	360	CQ	Chloroquine	600 mg d0 + 300 mg d1	900 mg	India	Wild - Dehli, India	P14	P14_126	126	1998	Adak et al, 1998	Outpatients	28.6376	77.2235	8	Frequent relapse + long latency	Frequent relapse + long latency, Old World	Old World	tropical	Old World, tropical
126_2159	No	NA	360	CQ	Chloroquine	600 mg d0 + 300 mg d1	900 mg	India	Wild - Dehli, India	P14	P14_126	126	1998	Adak et al, 1998	Outpatients	28.6376	77.2235	8	Frequent relapse + long latency	Frequent relapse + long latency, Old World	Old World	tropical	Old World, tropical
126_216	Yes	120	120	CQ	Chloroquine	600 mg d0 + 300 mg d1	900 mg	India	Wild - Dehli, India	P14	P14_126	126	1998	Adak et al, 1998	Outpatients	28.6376	77.2235	8	Frequent relapse + long latency	Frequent relapse + long latency, Old World	Old World	tropical	Old World, tropical
126_2160	No	NA	360	CQ	Chloroquine	600 mg d0 + 300 mg d1	900 mg	India	Wild - Dehli, India	P14	P14_126	126	1998	Adak et al, 1998	Outpatients	28.6376	77.2235	8	Frequent relapse + long latency	Frequent relapse + long latency, Old World	Old World	tropical	Old World, tropical
126_2161	No	NA	360	CQ	Chloroquine	600 mg d0 + 300 mg d1	900 mg	India	Wild - Dehli, India	P14	P14_126	126	1998	Adak et al, 1998	Outpatients	28.6376	77.2235	8	Frequent relapse + long latency	Frequent relapse + long latency, Old World	Old World	tropical	Old World, tropical
126_2162	No	NA	360	CQ	Chloroquine	600 mg d0 + 300 mg d1	900 mg	India	Wild - Dehli, India	P14	P14_126	126	1998	Adak et al, 1998	Outpatients	28.6376	77.2235	8	Frequent relapse + long latency	Frequent relapse + long latency, Old World	Old World	tropical	Old World, tropical
126_2163	No	NA	360	CQ	Chloroquine	600 mg d0 + 300 mg d1	900 mg	India	Wild - Dehli, India	P14	P14_126	126	1998	Adak et al, 1998	Outpatients	28.6376	77.2235	8	Frequent relapse + long latency	Frequent relapse + long latency, Old World	Old World	tropical	Old World, tropical
126_2164	No	NA	360	CQ	Chloroquine	600 mg d0 + 300 mg d1	900 mg	India	Wild - Dehli, India	P14	P14_126	126	1998	Adak et al, 1998	Outpatients	28.6376	77.2235	8	Frequent relapse + long latency	Frequent relapse + long latency, Old World	Old World	tropical	Old World, tropical
126_2165	No	NA	360	CQ	Chloroquine	600 mg d0 + 300 mg d1	900 mg	India	Wild - Dehli, India	P14	P14_126	126	1998	Adak et al, 1998	Outpatients	28.6376	77.2235	8	Frequent relapse + long latency	Frequent relapse + long latency, Old World	Old World	tropical	Old World, tropical
126_2166	No	NA	360	CQ	Chloroquine	600 mg d0 + 300 mg d1	900 mg	India	Wild - Dehli, India	P14	P14_126	126	1998	Adak et al, 1998	Outpatients	28.6376	77.2235	8	Frequent relapse + long latency	Frequent relapse + long latency, Old World	Old World	tropical	Old World, tropical
126_2167	No	NA	360	CQ	Chloroquine	600 mg d0 + 300 mg d1	900 mg	India	Wild - Dehli, India	P14	P14_126	126	1998	Adak et al, 1998	Outpatients	28.6376	77.2235	8	Frequent relapse + long latency	Frequent relapse + long latency, Old World	Old World	tropical	Old World, tropical
126_2168	No	NA	360	CQ	Chloroquine	600 mg d0 + 300 mg d1	900 mg	India	Wild - Dehli, India	P14	P14_126	126	1998	Adak et al, 1998	Outpatients	28.6376	77.2235	8	Frequent relapse + long latency	Frequent relapse + long latency, Old World	Old World	tropical	Old World, tropical
126_2169	No	NA	360	CQ	Chloroquine	600 mg d0 + 300 mg d1	900 mg	India	Wild - Dehli, India	P14	P14_126	126	1998	Adak et al, 1998	Outpatients	28.6376	77.2235	8	Frequent relapse + long latency	Frequent relapse + long latency, Old World	Old World	tropical	Old World, tropical
126_217	Yes	120	120	CQ	Chloroquine	600 mg d0 + 300 mg d1	900 mg	India	Wild - Dehli, India	P14	P14_126	126	1998	Adak et al, 1998	Outpatients	28.6376	77.2235	8	Frequent relapse + long latency	Frequent relapse + long latency, Old World	Old World	tropical	Old World, tropical
126_2170	No	NA	360	CQ	Chloroquine	600 mg d0 + 300 mg d1	900 mg	India	Wild - Dehli, India	P14	P14_126	126	1998	Adak et al, 1998	Outpatients	28.6376	77.2235	8	Frequent relapse + long latency	Frequent relapse + long latency, Old World	Old World	tropical	Old World, tropical
126_2171	No	NA	360	CQ	Chloroquine	600 mg d0 + 300 mg d1	900 mg	India	Wild - Dehli, India	P14	P14_126	126	1998	Adak et al, 1998	Outpatients	28.6376	77.2235	8	Frequent relapse + long latency	Frequent relapse + long latency, Old World	Old World	tropical	Old World, tropical
126_2172	No	NA	360	CQ	Chloroquine	600 mg d0 + 300 mg d1	900 mg	India	Wild - Dehli, India	P14	P14_126	126	1998	Adak et al, 1998	Outpatients	28.6376	77.2235	8	Frequent relapse + long latency	Frequent relapse + long latency, Old World	Old World	tropical	Old World, tropical
126_2173	No	NA	360	CQ	Chloroquine	600 mg d0 + 300 mg d1	900 mg	India	Wild - Dehli, India	P14	P14_126	126	1998	Adak et al, 1998	Outpatients	28.6376	77.2235	8	Frequent relapse + long latency	Frequent relapse + long latency, Old World	Old World	tropical	Old World, tropical
126_2174	No	NA	360	CQ	Chloroquine	600 mg d0 + 300 mg d1	900 mg	India	Wild - Dehli, India	P14	P14_126	126	1998	Adak et al, 1998	Outpatients	28.6376	77.2235	8	Frequent relapse + long latency	Frequent relapse + long latency, Old World	Old World	tropical	Old World, tropical
126_2175	No	NA	360	CQ	Chloroquine	600 mg d0 + 300 mg d1	900 mg	India	Wild - Dehli, India	P14	P14_126	126	1998	Adak et al, 1998	Outpatients	28.6376	77.2235	8	Frequent relapse + long latency	Frequent relapse + long latency, Old World	Old World	tropical	Old World, tropical
126_2176	No	NA	360	CQ	Chloroquine	600 mg d0 + 300 mg d1	900 mg	India	Wild - Dehli, India	P14	P14_126	126	1998	Adak et al, 1998	Outpatients	28.6376	77.2235	8	Frequent relapse + long latency	Frequent relapse + long latency, Old World	Old World	tropical	Old World, tropical
126_2177	No	NA	360	CQ	Chloroquine	600 mg d0 + 300 mg d1	900 mg	India	Wild - Dehli, India	P14	P14_126	126	1998	Adak et al, 1998	Outpatients	28.6376	77.2235	8	Frequent relapse + long latency	Frequent relapse + long latency, Old World	Old World	tropical	Old World, tropical
126_2178	No	NA	360	CQ	Chloroquine	600 mg d0 + 300 mg d1	900 mg	India	Wild - Dehli, India	P14	P14_126	126	1998	Adak et al, 1998	Outpatients	28.6376	77.2235	8	Frequent relapse + long latency	Frequent relapse + long latency, Old World	Old World	tropical	Old World, tropical
126_2179	No	NA	360	CQ	Chloroquine	600 mg d0 + 300 mg d1	900 mg	India	Wild - Dehli, India	P14	P14_126	126	1998	Adak et al, 1998	Outpatients	28.6376	77.2235	8	Frequent relapse + long latency	Frequent relapse + long latency, Old World	Old World	tropical	Old World, tropical
126_218	Yes	120	120	CQ	Chloroquine	600 mg d0 + 300 mg d1	900 mg	India	Wild - Dehli, India	P14	P14_126	126	1998	Adak et al, 1998	Outpatients	28.6376	77.2235	8	Frequent relapse + long latency	Frequent relapse + long latency, Old World	Old World	tropical	Old World, tropical
126_2180	No	NA	360	CQ	Chloroquine	600 mg d0 + 300 mg d1	900 mg	India	Wild - Dehli, India	P14	P14_126	126	1998	Adak et al, 1998	Outpatients	28.6376	77.2235	8	Frequent relapse + long latency	Frequent relapse + long latency, Old World	Old World	tropical	Old World, tropical
126_2181	No	NA	360	CQ	Chloroquine	600 mg d0 + 300 mg d1	900 mg	India	Wild - Dehli, India	P14	P14_126	126	1998	Adak et al, 1998	Outpatients	28.6376	77.2235	8	Frequent relapse + long latency	Frequent relapse + long latency, Old World	Old World	tropical	Old World, tropical
126_2182	No	NA	360	CQ	Chloroquine	600 mg d0 + 300 mg d1	900 mg	India	Wild - Dehli, India	P14	P14_126	126	1998	Adak et al, 1998	Outpatients	28.6376	77.2235	8	Frequent relapse + long latency	Frequent relapse + long latency, Old World	Old World	tropical	Old World, tropical
126_2183	No	NA	360	CQ	Chloroquine	600 mg d0 + 300 mg d1	900 mg	India	Wild - Dehli, India	P14	P14_126	126	1998	Adak et al, 1998	Outpatients	28.6376	77.2235	8	Frequent relapse + long latency	Frequent relapse + long latency, Old World	Old World	tropical	Old World, tropical
126_2184	No	NA	360	CQ	Chloroquine	600 mg d0 + 300 mg d1	900 mg	India	Wild - Dehli, India	P14	P14_126	126	1998	Adak et al, 1998	Outpatients	28.6376	77.2235	8	Frequent relapse + long latency	Frequent relapse + long latency, Old World	Old World	tropical	Old World, tropical
126_2185	No	NA	360	CQ	Chloroquine	600 mg d0 + 300 mg d1	900 mg	India	Wild - Dehli, India	P14	P14_126	126	1998	Adak et al, 1998	Outpatients	28.6376	77.2235	8	Frequent relapse + long latency	Frequent relapse + long latency, Old World	Old World	tropical	Old World, tropical
126_2186	No	NA	360	CQ	Chloroquine	600 mg d0 + 300 mg d1	900 mg	India	Wild - Dehli, India	P14	P14_126	126	1998	Adak et al, 1998	Outpatients	28.6376	77.2235	8	Frequent relapse + long latency	Frequent relapse + long latency, Old World	Old World	tropical	Old World, tropical
126_2187	No	NA	360	CQ	Chloroquine	600 mg d0 + 300 mg d1	900 mg	India	Wild - Dehli, India	P14	P14_126	126	1998	Adak et al, 1998	Outpatients	28.6376	77.2235	8	Frequent relapse + long latency	Frequent relapse + long latency, Old World	Old World	tropical	Old World, tropical
126_2188	No	NA	360	CQ	Chloroquine	600 mg d0 + 300 mg d1	900 mg	India	Wild - Dehli, India	P14	P14_126	126	1998	Adak et al, 1998	Outpatients	28.6376	77.2235	8	Frequent relapse + long latency	Frequent relapse + long latency, Old World	Old World	tropical	Old World, tropical
126_2189	No	NA	360	CQ	Chloroquine	600 mg d0 + 300 mg d1	900 mg	India	Wild - Dehli, India	P14	P14_126	126	1998	Adak et al, 1998	Outpatients	28.6376	77.2235	8	Frequent relapse + long latency	Frequent relapse + long latency, Old World	Old World	tropical	Old World, tropical
126_219	Yes	120	120	CQ	Chloroquine	600 mg d0 + 300 mg d1	900 mg	India	Wild - Dehli, India	P14	P14_126	126	1998	Adak et al, 1998	Outpatients	28.6376	77.2235	8	Frequent relapse + long latency	Frequent relapse + long latency, Old World	Old World	tropical	Old World, tropical
126_2190	No	NA	360	CQ	Chloroquine	600 mg d0 + 300 mg d1	900 mg	India	Wild - Dehli, India	P14	P14_126	126	1998	Adak et al, 1998	Outpatients	28.6376	77.2235	8	Frequent relapse + long latency	Frequent relapse + long latency, Old World	Old World	tropical	Old World, tropical
126_2191	No	NA	360	CQ	Chloroquine	600 mg d0 + 300 mg d1	900 mg	India	Wild - Dehli, India	P14	P14_126	126	1998	Adak et al, 1998	Outpatients	28.6376	77.2235	8	Frequent relapse + long latency	Frequent relapse + long latency, Old World	Old World	tropical	Old World, tropical
126_2192	No	NA	360	CQ	Chloroquine	600 mg d0 + 300 mg d1	900 mg	India	Wild - Dehli, India	P14	P14_126	126	1998	Adak et al, 1998	Outpatients	28.6376	77.2235	8	Frequent relapse + long latency	Frequent relapse + long latency, Old World	Old World	tropical	Old World, tropical
126_2193	No	NA	360	CQ	Chloroquine	600 mg d0 + 300 mg d1	900 mg	India	Wild - Dehli, India	P14	P14_126	126	1998	Adak et al, 1998	Outpatients	28.6376	77.2235	8	Frequent relapse + long latency	Frequent relapse + long latency, Old World	Old World	tropical	Old World, tropical
126_2194	No	NA	360	CQ	Chloroquine	600 mg d0 + 300 mg d1	900 mg	India	Wild - Dehli, India	P14	P14_126	126	1998	Adak et al, 1998	Outpatients	28.6376	77.2235	8	Frequent relapse + long latency	Frequent relapse + long latency, Old World	Old World	tropical	Old World, tropical
126_2195	No	NA	360	CQ	Chloroquine	600 mg d0 + 300 mg d1	900 mg	India	Wild - Dehli, India	P14	P14_126	126	1998	Adak et al, 1998	Outpatients	28.6376	77.2235	8	Frequent relapse + long latency	Frequent relapse + long latency, Old World	Old World	tropical	Old World, tropical
126_2196	No	NA	360	CQ	Chloroquine	600 mg d0 + 300 mg d1	900 mg	India	Wild - Dehli, India	P14	P14_126	126	1998	Adak et al, 1998	Outpatients	28.6376	77.2235	8	Frequent relapse + long latency	Frequent relapse + long latency, Old World	Old World	tropical	Old World, tropical
126_2197	No	NA	360	CQ	Chloroquine	600 mg d0 + 300 mg d1	900 mg	India	Wild - Dehli, India	P14	P14_126	126	1998	Adak et al, 1998	Outpatients	28.6376	77.2235	8	Frequent relapse + long latency	Frequent relapse + long latency, Old World	Old World	tropical	Old World, tropical
126_2198	No	NA	360	CQ	Chloroquine	600 mg d0 + 300 mg d1	900 mg	India	Wild - Dehli, India	P14	P14_126	126	1998	Adak et al, 1998	Outpatients	28.6376	77.2235	8	Frequent relapse + long latency	Frequent relapse + long latency, Old World	Old World	tropical	Old World, tropical
126_2199	No	NA	360	CQ	Chloroquine	600 mg d0 + 300 mg d1	900 mg	India	Wild - Dehli, India	P14	P14_126	126	1998	Adak et al, 1998	Outpatients	28.6376	77.2235	8	Frequent relapse + long latency	Frequent relapse + long latency, Old World	Old World	tropical	Old World, tropical
126_22	Yes	30	30	CQ	Chloroquine	600 mg d0 + 300 mg d1	900 mg	India	Wild - Dehli, India	P14	P14_126	126	1998	Adak et al, 1998	Outpatients	28.6376	77.2235	8	Frequent relapse + long latency	Frequent relapse + long latency, Old World	Old World	tropical	Old World, tropical
126_220	Yes	120	120	CQ	Chloroquine	600 mg d0 + 300 mg d1	900 mg	India	Wild - Dehli, India	P14	P14_126	126	1998	Adak et al, 1998	Outpatients	28.6376	77.2235	8	Frequent relapse + long latency	Frequent relapse + long latency, Old World	Old World	tropical	Old World, tropical
126_2200	No	NA	360	CQ	Chloroquine	600 mg d0 + 300 mg d1	900 mg	India	Wild - Dehli, India	P14	P14_126	126	1998	Adak et al, 1998	Outpatients	28.6376	77.2235	8	Frequent relapse + long latency	Frequent relapse + long latency, Old World	Old World	tropical	Old World, tropical
126_2201	No	NA	360	CQ	Chloroquine	600 mg d0 + 300 mg d1	900 mg	India	Wild - Dehli, India	P14	P14_126	126	1998	Adak et al, 1998	Outpatients	28.6376	77.2235	8	Frequent relapse + long latency	Frequent relapse + long latency, Old World	Old World	tropical	Old World, tropical
126_2202	No	NA	360	CQ	Chloroquine	600 mg d0 + 300 mg d1	900 mg	India	Wild - Dehli, India	P14	P14_126	126	1998	Adak et al, 1998	Outpatients	28.6376	77.2235	8	Frequent relapse + long latency	Frequent relapse + long latency, Old World	Old World	tropical	Old World, tropical
126_2203	No	NA	360	CQ	Chloroquine	600 mg d0 + 300 mg d1	900 mg	India	Wild - Dehli, India	P14	P14_126	126	1998	Adak et al, 1998	Outpatients	28.6376	77.2235	8	Frequent relapse + long latency	Frequent relapse + long latency, Old World	Old World	tropical	Old World, tropical
126_2204	No	NA	360	CQ	Chloroquine	600 mg d0 + 300 mg d1	900 mg	India	Wild - Dehli, India	P14	P14_126	126	1998	Adak et al, 1998	Outpatients	28.6376	77.2235	8	Frequent relapse + long latency	Frequent relapse + long latency, Old World	Old World	tropical	Old World, tropical
126_2205	No	NA	360	CQ	Chloroquine	600 mg d0 + 300 mg d1	900 mg	India	Wild - Dehli, India	P14	P14_126	126	1998	Adak et al, 1998	Outpatients	28.6376	77.2235	8	Frequent relapse + long latency	Frequent relapse + long latency, Old World	Old World	tropical	Old World, tropical
126_2206	No	NA	360	CQ	Chloroquine	600 mg d0 + 300 mg d1	900 mg	India	Wild - Dehli, India	P14	P14_126	126	1998	Adak et al, 1998	Outpatients	28.6376	77.2235	8	Frequent relapse + long latency	Frequent relapse + long latency, Old World	Old World	tropical	Old World, tropical
126_2207	No	NA	360	CQ	Chloroquine	600 mg d0 + 300 mg d1	900 mg	India	Wild - Dehli, India	P14	P14_126	126	1998	Adak et al, 1998	Outpatients	28.6376	77.2235	8	Frequent relapse + long latency	Frequent relapse + long latency, Old World	Old World	tropical	Old World, tropical
126_2208	No	NA	360	CQ	Chloroquine	600 mg d0 + 300 mg d1	900 mg	India	Wild - Dehli, India	P14	P14_126	126	1998	Adak et al, 1998	Outpatients	28.6376	77.2235	8	Frequent relapse + long latency	Frequent relapse + long latency, Old World	Old World	tropical	Old World, tropical
126_2209	No	NA	360	CQ	Chloroquine	600 mg d0 + 300 mg d1	900 mg	India	Wild - Dehli, India	P14	P14_126	126	1998	Adak et al, 1998	Outpatients	28.6376	77.2235	8	Frequent relapse + long latency	Frequent relapse + long latency, Old World	Old World	tropical	Old World, tropical
126_221	Yes	120	120	CQ	Chloroquine	600 mg d0 + 300 mg d1	900 mg	India	Wild - Dehli, India	P14	P14_126	126	1998	Adak et al, 1998	Outpatients	28.6376	77.2235	8	Frequent relapse + long latency	Frequent relapse + long latency, Old World	Old World	tropical	Old World, tropical
126_2210	No	NA	360	CQ	Chloroquine	600 mg d0 + 300 mg d1	900 mg	India	Wild - Dehli, India	P14	P14_126	126	1998	Adak et al, 1998	Outpatients	28.6376	77.2235	8	Frequent relapse + long latency	Frequent relapse + long latency, Old World	Old World	tropical	Old World, tropical
126_2211	No	NA	360	CQ	Chloroquine	600 mg d0 + 300 mg d1	900 mg	India	Wild - Dehli, India	P14	P14_126	126	1998	Adak et al, 1998	Outpatients	28.6376	77.2235	8	Frequent relapse + long latency	Frequent relapse + long latency, Old World	Old World	tropical	Old World, tropical
126_2212	No	NA	360	CQ	Chloroquine	600 mg d0 + 300 mg d1	900 mg	India	Wild - Dehli, India	P14	P14_126	126	1998	Adak et al, 1998	Outpatients	28.6376	77.2235	8	Frequent relapse + long latency	Frequent relapse + long latency, Old World	Old World	tropical	Old World, tropical
126_2213	No	NA	360	CQ	Chloroquine	600 mg d0 + 300 mg d1	900 mg	India	Wild - Dehli, India	P14	P14_126	126	1998	Adak et al, 1998	Outpatients	28.6376	77.2235	8	Frequent relapse + long latency	Frequent relapse + long latency, Old World	Old World	tropical	Old World, tropical
126_2214	No	NA	360	CQ	Chloroquine	600 mg d0 + 300 mg d1	900 mg	India	Wild - Dehli, India	P14	P14_126	126	1998	Adak et al, 1998	Outpatients	28.6376	77.2235	8	Frequent relapse + long latency	Frequent relapse + long latency, Old World	Old World	tropical	Old World, tropical
126_2215	No	NA	360	CQ	Chloroquine	600 mg d0 + 300 mg d1	900 mg	India	Wild - Dehli, India	P14	P14_126	126	1998	Adak et al, 1998	Outpatients	28.6376	77.2235	8	Frequent relapse + long latency	Frequent relapse + long latency, Old World	Old World	tropical	Old World, tropical
126_2216	No	NA	360	CQ	Chloroquine	600 mg d0 + 300 mg d1	900 mg	India	Wild - Dehli, India	P14	P14_126	126	1998	Adak et al, 1998	Outpatients	28.6376	77.2235	8	Frequent relapse + long latency	Frequent relapse + long latency, Old World	Old World	tropical	Old World, tropical
126_2217	No	NA	360	CQ	Chloroquine	600 mg d0 + 300 mg d1	900 mg	India	Wild - Dehli, India	P14	P14_126	126	1998	Adak et al, 1998	Outpatients	28.6376	77.2235	8	Frequent relapse + long latency	Frequent relapse + long latency, Old World	Old World	tropical	Old World, tropical
126_2218	No	NA	360	CQ	Chloroquine	600 mg d0 + 300 mg d1	900 mg	India	Wild - Dehli, India	P14	P14_126	126	1998	Adak et al, 1998	Outpatients	28.6376	77.2235	8	Frequent relapse + long latency	Frequent relapse + long latency, Old World	Old World	tropical	Old World, tropical
126_2219	No	NA	360	CQ	Chloroquine	600 mg d0 + 300 mg d1	900 mg	India	Wild - Dehli, India	P14	P14_126	126	1998	Adak et al, 1998	Outpatients	28.6376	77.2235	8	Frequent relapse + long latency	Frequent relapse + long latency, Old World	Old World	tropical	Old World, tropical
126_222	Yes	120	120	CQ	Chloroquine	600 mg d0 + 300 mg d1	900 mg	India	Wild - Dehli, India	P14	P14_126	126	1998	Adak et al, 1998	Outpatients	28.6376	77.2235	8	Frequent relapse + long latency	Frequent relapse + long latency, Old World	Old World	tropical	Old World, tropical
126_2220	No	NA	360	CQ	Chloroquine	600 mg d0 + 300 mg d1	900 mg	India	Wild - Dehli, India	P14	P14_126	126	1998	Adak et al, 1998	Outpatients	28.6376	77.2235	8	Frequent relapse + long latency	Frequent relapse + long latency, Old World	Old World	tropical	Old World, tropical
126_2221	No	NA	360	CQ	Chloroquine	600 mg d0 + 300 mg d1	900 mg	India	Wild - Dehli, India	P14	P14_126	126	1998	Adak et al, 1998	Outpatients	28.6376	77.2235	8	Frequent relapse + long latency	Frequent relapse + long latency, Old World	Old World	tropical	Old World, tropical
126_2222	No	NA	360	CQ	Chloroquine	600 mg d0 + 300 mg d1	900 mg	India	Wild - Dehli, India	P14	P14_126	126	1998	Adak et al, 1998	Outpatients	28.6376	77.2235	8	Frequent relapse + long latency	Frequent relapse + long latency, Old World	Old World	tropical	Old World, tropical
126_2223	No	NA	360	CQ	Chloroquine	600 mg d0 + 300 mg d1	900 mg	India	Wild - Dehli, India	P14	P14_126	126	1998	Adak et al, 1998	Outpatients	28.6376	77.2235	8	Frequent relapse + long latency	Frequent relapse + long latency, Old World	Old World	tropical	Old World, tropical
126_2224	No	NA	360	CQ	Chloroquine	600 mg d0 + 300 mg d1	900 mg	India	Wild - Dehli, India	P14	P14_126	126	1998	Adak et al, 1998	Outpatients	28.6376	77.2235	8	Frequent relapse + long latency	Frequent relapse + long latency, Old World	Old World	tropical	Old World, tropical
126_2225	No	NA	360	CQ	Chloroquine	600 mg d0 + 300 mg d1	900 mg	India	Wild - Dehli, India	P14	P14_126	126	1998	Adak et al, 1998	Outpatients	28.6376	77.2235	8	Frequent relapse + long latency	Frequent relapse + long latency, Old World	Old World	tropical	Old World, tropical
126_2226	No	NA	360	CQ	Chloroquine	600 mg d0 + 300 mg d1	900 mg	India	Wild - Dehli, India	P14	P14_126	126	1998	Adak et al, 1998	Outpatients	28.6376	77.2235	8	Frequent relapse + long latency	Frequent relapse + long latency, Old World	Old World	tropical	Old World, tropical
126_2227	No	NA	360	CQ	Chloroquine	600 mg d0 + 300 mg d1	900 mg	India	Wild - Dehli, India	P14	P14_126	126	1998	Adak et al, 1998	Outpatients	28.6376	77.2235	8	Frequent relapse + long latency	Frequent relapse + long latency, Old World	Old World	tropical	Old World, tropical
126_2228	No	NA	360	CQ	Chloroquine	600 mg d0 + 300 mg d1	900 mg	India	Wild - Dehli, India	P14	P14_126	126	1998	Adak et al, 1998	Outpatients	28.6376	77.2235	8	Frequent relapse + long latency	Frequent relapse + long latency, Old World	Old World	tropical	Old World, tropical
126_2229	No	NA	360	CQ	Chloroquine	600 mg d0 + 300 mg d1	900 mg	India	Wild - Dehli, India	P14	P14_126	126	1998	Adak et al, 1998	Outpatients	28.6376	77.2235	8	Frequent relapse + long latency	Frequent relapse + long latency, Old World	Old World	tropical	Old World, tropical
126_223	Yes	120	120	CQ	Chloroquine	600 mg d0 + 300 mg d1	900 mg	India	Wild - Dehli, India	P14	P14_126	126	1998	Adak et al, 1998	Outpatients	28.6376	77.2235	8	Frequent relapse + long latency	Frequent relapse + long latency, Old World	Old World	tropical	Old World, tropical
126_2230	No	NA	360	CQ	Chloroquine	600 mg d0 + 300 mg d1	900 mg	India	Wild - Dehli, India	P14	P14_126	126	1998	Adak et al, 1998	Outpatients	28.6376	77.2235	8	Frequent relapse + long latency	Frequent relapse + long latency, Old World	Old World	tropical	Old World, tropical
126_2231	No	NA	360	CQ	Chloroquine	600 mg d0 + 300 mg d1	900 mg	India	Wild - Dehli, India	P14	P14_126	126	1998	Adak et al, 1998	Outpatients	28.6376	77.2235	8	Frequent relapse + long latency	Frequent relapse + long latency, Old World	Old World	tropical	Old World, tropical
126_2232	No	NA	360	CQ	Chloroquine	600 mg d0 + 300 mg d1	900 mg	India	Wild - Dehli, India	P14	P14_126	126	1998	Adak et al, 1998	Outpatients	28.6376	77.2235	8	Frequent relapse + long latency	Frequent relapse + long latency, Old World	Old World	tropical	Old World, tropical
126_2233	No	NA	360	CQ	Chloroquine	600 mg d0 + 300 mg d1	900 mg	India	Wild - Dehli, India	P14	P14_126	126	1998	Adak et al, 1998	Outpatients	28.6376	77.2235	8	Frequent relapse + long latency	Frequent relapse + long latency, Old World	Old World	tropical	Old World, tropical
126_2234	No	NA	360	CQ	Chloroquine	600 mg d0 + 300 mg d1	900 mg	India	Wild - Dehli, India	P14	P14_126	126	1998	Adak et al, 1998	Outpatients	28.6376	77.2235	8	Frequent relapse + long latency	Frequent relapse + long latency, Old World	Old World	tropical	Old World, tropical
126_2235	No	NA	360	CQ	Chloroquine	600 mg d0 + 300 mg d1	900 mg	India	Wild - Dehli, India	P14	P14_126	126	1998	Adak et al, 1998	Outpatients	28.6376	77.2235	8	Frequent relapse + long latency	Frequent relapse + long latency, Old World	Old World	tropical	Old World, tropical
126_2236	No	NA	360	CQ	Chloroquine	600 mg d0 + 300 mg d1	900 mg	India	Wild - Dehli, India	P14	P14_126	126	1998	Adak et al, 1998	Outpatients	28.6376	77.2235	8	Frequent relapse + long latency	Frequent relapse + long latency, Old World	Old World	tropical	Old World, tropical
126_2237	No	NA	360	CQ	Chloroquine	600 mg d0 + 300 mg d1	900 mg	India	Wild - Dehli, India	P14	P14_126	126	1998	Adak et al, 1998	Outpatients	28.6376	77.2235	8	Frequent relapse + long latency	Frequent relapse + long latency, Old World	Old World	tropical	Old World, tropical
126_2238	No	NA	360	CQ	Chloroquine	600 mg d0 + 300 mg d1	900 mg	India	Wild - Dehli, India	P14	P14_126	126	1998	Adak et al, 1998	Outpatients	28.6376	77.2235	8	Frequent relapse + long latency	Frequent relapse + long latency, Old World	Old World	tropical	Old World, tropical
126_2239	No	NA	360	CQ	Chloroquine	600 mg d0 + 300 mg d1	900 mg	India	Wild - Dehli, India	P14	P14_126	126	1998	Adak et al, 1998	Outpatients	28.6376	77.2235	8	Frequent relapse + long latency	Frequent relapse + long latency, Old World	Old World	tropical	Old World, tropical
126_224	Yes	120	120	CQ	Chloroquine	600 mg d0 + 300 mg d1	900 mg	India	Wild - Dehli, India	P14	P14_126	126	1998	Adak et al, 1998	Outpatients	28.6376	77.2235	8	Frequent relapse + long latency	Frequent relapse + long latency, Old World	Old World	tropical	Old World, tropical
126_2240	No	NA	360	CQ	Chloroquine	600 mg d0 + 300 mg d1	900 mg	India	Wild - Dehli, India	P14	P14_126	126	1998	Adak et al, 1998	Outpatients	28.6376	77.2235	8	Frequent relapse + long latency	Frequent relapse + long latency, Old World	Old World	tropical	Old World, tropical
126_2241	No	NA	360	CQ	Chloroquine	600 mg d0 + 300 mg d1	900 mg	India	Wild - Dehli, India	P14	P14_126	126	1998	Adak et al, 1998	Outpatients	28.6376	77.2235	8	Frequent relapse + long latency	Frequent relapse + long latency, Old World	Old World	tropical	Old World, tropical
126_2242	No	NA	360	CQ	Chloroquine	600 mg d0 + 300 mg d1	900 mg	India	Wild - Dehli, India	P14	P14_126	126	1998	Adak et al, 1998	Outpatients	28.6376	77.2235	8	Frequent relapse + long latency	Frequent relapse + long latency, Old World	Old World	tropical	Old World, tropical
126_2243	No	NA	360	CQ	Chloroquine	600 mg d0 + 300 mg d1	900 mg	India	Wild - Dehli, India	P14	P14_126	126	1998	Adak et al, 1998	Outpatients	28.6376	77.2235	8	Frequent relapse + long latency	Frequent relapse + long latency, Old World	Old World	tropical	Old World, tropical
126_2244	No	NA	360	CQ	Chloroquine	600 mg d0 + 300 mg d1	900 mg	India	Wild - Dehli, India	P14	P14_126	126	1998	Adak et al, 1998	Outpatients	28.6376	77.2235	8	Frequent relapse + long latency	Frequent relapse + long latency, Old World	Old World	tropical	Old World, tropical
126_2245	No	NA	360	CQ	Chloroquine	600 mg d0 + 300 mg d1	900 mg	India	Wild - Dehli, India	P14	P14_126	126	1998	Adak et al, 1998	Outpatients	28.6376	77.2235	8	Frequent relapse + long latency	Frequent relapse + long latency, Old World	Old World	tropical	Old World, tropical
126_2246	No	NA	360	CQ	Chloroquine	600 mg d0 + 300 mg d1	900 mg	India	Wild - Dehli, India	P14	P14_126	126	1998	Adak et al, 1998	Outpatients	28.6376	77.2235	8	Frequent relapse + long latency	Frequent relapse + long latency, Old World	Old World	tropical	Old World, tropical
126_2247	No	NA	360	CQ	Chloroquine	600 mg d0 + 300 mg d1	900 mg	India	Wild - Dehli, India	P14	P14_126	126	1998	Adak et al, 1998	Outpatients	28.6376	77.2235	8	Frequent relapse + long latency	Frequent relapse + long latency, Old World	Old World	tropical	Old World, tropical
126_2248	No	NA	360	CQ	Chloroquine	600 mg d0 + 300 mg d1	900 mg	India	Wild - Dehli, India	P14	P14_126	126	1998	Adak et al, 1998	Outpatients	28.6376	77.2235	8	Frequent relapse + long latency	Frequent relapse + long latency, Old World	Old World	tropical	Old World, tropical
126_2249	No	NA	360	CQ	Chloroquine	600 mg d0 + 300 mg d1	900 mg	India	Wild - Dehli, India	P14	P14_126	126	1998	Adak et al, 1998	Outpatients	28.6376	77.2235	8	Frequent relapse + long latency	Frequent relapse + long latency, Old World	Old World	tropical	Old World, tropical
126_225	Yes	120	120	CQ	Chloroquine	600 mg d0 + 300 mg d1	900 mg	India	Wild - Dehli, India	P14	P14_126	126	1998	Adak et al, 1998	Outpatients	28.6376	77.2235	8	Frequent relapse + long latency	Frequent relapse + long latency, Old World	Old World	tropical	Old World, tropical
126_2250	No	NA	360	CQ	Chloroquine	600 mg d0 + 300 mg d1	900 mg	India	Wild - Dehli, India	P14	P14_126	126	1998	Adak et al, 1998	Outpatients	28.6376	77.2235	8	Frequent relapse + long latency	Frequent relapse + long latency, Old World	Old World	tropical	Old World, tropical
126_2251	No	NA	360	CQ	Chloroquine	600 mg d0 + 300 mg d1	900 mg	India	Wild - Dehli, India	P14	P14_126	126	1998	Adak et al, 1998	Outpatients	28.6376	77.2235	8	Frequent relapse + long latency	Frequent relapse + long latency, Old World	Old World	tropical	Old World, tropical
126_2252	No	NA	360	CQ	Chloroquine	600 mg d0 + 300 mg d1	900 mg	India	Wild - Dehli, India	P14	P14_126	126	1998	Adak et al, 1998	Outpatients	28.6376	77.2235	8	Frequent relapse + long latency	Frequent relapse + long latency, Old World	Old World	tropical	Old World, tropical
126_2253	No	NA	360	CQ	Chloroquine	600 mg d0 + 300 mg d1	900 mg	India	Wild - Dehli, India	P14	P14_126	126	1998	Adak et al, 1998	Outpatients	28.6376	77.2235	8	Frequent relapse + long latency	Frequent relapse + long latency, Old World	Old World	tropical	Old World, tropical
126_2254	No	NA	360	CQ	Chloroquine	600 mg d0 + 300 mg d1	900 mg	India	Wild - Dehli, India	P14	P14_126	126	1998	Adak et al, 1998	Outpatients	28.6376	77.2235	8	Frequent relapse + long latency	Frequent relapse + long latency, Old World	Old World	tropical	Old World, tropical
126_2255	No	NA	360	CQ	Chloroquine	600 mg d0 + 300 mg d1	900 mg	India	Wild - Dehli, India	P14	P14_126	126	1998	Adak et al, 1998	Outpatients	28.6376	77.2235	8	Frequent relapse + long latency	Frequent relapse + long latency, Old World	Old World	tropical	Old World, tropical
126_2256	No	NA	360	CQ	Chloroquine	600 mg d0 + 300 mg d1	900 mg	India	Wild - Dehli, India	P14	P14_126	126	1998	Adak et al, 1998	Outpatients	28.6376	77.2235	8	Frequent relapse + long latency	Frequent relapse + long latency, Old World	Old World	tropical	Old World, tropical
126_2257	No	NA	360	CQ	Chloroquine	600 mg d0 + 300 mg d1	900 mg	India	Wild - Dehli, India	P14	P14_126	126	1998	Adak et al, 1998	Outpatients	28.6376	77.2235	8	Frequent relapse + long latency	Frequent relapse + long latency, Old World	Old World	tropical	Old World, tropical
126_2258	No	NA	360	CQ	Chloroquine	600 mg d0 + 300 mg d1	900 mg	India	Wild - Dehli, India	P14	P14_126	126	1998	Adak et al, 1998	Outpatients	28.6376	77.2235	8	Frequent relapse + long latency	Frequent relapse + long latency, Old World	Old World	tropical	Old World, tropical
126_2259	No	NA	360	CQ	Chloroquine	600 mg d0 + 300 mg d1	900 mg	India	Wild - Dehli, India	P14	P14_126	126	1998	Adak et al, 1998	Outpatients	28.6376	77.2235	8	Frequent relapse + long latency	Frequent relapse + long latency, Old World	Old World	tropical	Old World, tropical
126_226	Yes	120	120	CQ	Chloroquine	600 mg d0 + 300 mg d1	900 mg	India	Wild - Dehli, India	P14	P14_126	126	1998	Adak et al, 1998	Outpatients	28.6376	77.2235	8	Frequent relapse + long latency	Frequent relapse + long latency, Old World	Old World	tropical	Old World, tropical
126_2260	No	NA	360	CQ	Chloroquine	600 mg d0 + 300 mg d1	900 mg	India	Wild - Dehli, India	P14	P14_126	126	1998	Adak et al, 1998	Outpatients	28.6376	77.2235	8	Frequent relapse + long latency	Frequent relapse + long latency, Old World	Old World	tropical	Old World, tropical
126_2261	No	NA	360	CQ	Chloroquine	600 mg d0 + 300 mg d1	900 mg	India	Wild - Dehli, India	P14	P14_126	126	1998	Adak et al, 1998	Outpatients	28.6376	77.2235	8	Frequent relapse + long latency	Frequent relapse + long latency, Old World	Old World	tropical	Old World, tropical
126_2262	No	NA	360	CQ	Chloroquine	600 mg d0 + 300 mg d1	900 mg	India	Wild - Dehli, India	P14	P14_126	126	1998	Adak et al, 1998	Outpatients	28.6376	77.2235	8	Frequent relapse + long latency	Frequent relapse + long latency, Old World	Old World	tropical	Old World, tropical
126_2263	No	NA	360	CQ	Chloroquine	600 mg d0 + 300 mg d1	900 mg	India	Wild - Dehli, India	P14	P14_126	126	1998	Adak et al, 1998	Outpatients	28.6376	77.2235	8	Frequent relapse + long latency	Frequent relapse + long latency, Old World	Old World	tropical	Old World, tropical
126_2264	No	NA	360	CQ	Chloroquine	600 mg d0 + 300 mg d1	900 mg	India	Wild - Dehli, India	P14	P14_126	126	1998	Adak et al, 1998	Outpatients	28.6376	77.2235	8	Frequent relapse + long latency	Frequent relapse + long latency, Old World	Old World	tropical	Old World, tropical
126_2265	No	NA	360	CQ	Chloroquine	600 mg d0 + 300 mg d1	900 mg	India	Wild - Dehli, India	P14	P14_126	126	1998	Adak et al, 1998	Outpatients	28.6376	77.2235	8	Frequent relapse + long latency	Frequent relapse + long latency, Old World	Old World	tropical	Old World, tropical
126_2266	No	NA	360	CQ	Chloroquine	600 mg d0 + 300 mg d1	900 mg	India	Wild - Dehli, India	P14	P14_126	126	1998	Adak et al, 1998	Outpatients	28.6376	77.2235	8	Frequent relapse + long latency	Frequent relapse + long latency, Old World	Old World	tropical	Old World, tropical
126_2267	No	NA	360	CQ	Chloroquine	600 mg d0 + 300 mg d1	900 mg	India	Wild - Dehli, India	P14	P14_126	126	1998	Adak et al, 1998	Outpatients	28.6376	77.2235	8	Frequent relapse + long latency	Frequent relapse + long latency, Old World	Old World	tropical	Old World, tropical
126_2268	No	NA	360	CQ	Chloroquine	600 mg d0 + 300 mg d1	900 mg	India	Wild - Dehli, India	P14	P14_126	126	1998	Adak et al, 1998	Outpatients	28.6376	77.2235	8	Frequent relapse + long latency	Frequent relapse + long latency, Old World	Old World	tropical	Old World, tropical
126_2269	No	NA	360	CQ	Chloroquine	600 mg d0 + 300 mg d1	900 mg	India	Wild - Dehli, India	P14	P14_126	126	1998	Adak et al, 1998	Outpatients	28.6376	77.2235	8	Frequent relapse + long latency	Frequent relapse + long latency, Old World	Old World	tropical	Old World, tropical
126_227	Yes	120	120	CQ	Chloroquine	600 mg d0 + 300 mg d1	900 mg	India	Wild - Dehli, India	P14	P14_126	126	1998	Adak et al, 1998	Outpatients	28.6376	77.2235	8	Frequent relapse + long latency	Frequent relapse + long latency, Old World	Old World	tropical	Old World, tropical
126_2270	No	NA	360	CQ	Chloroquine	600 mg d0 + 300 mg d1	900 mg	India	Wild - Dehli, India	P14	P14_126	126	1998	Adak et al, 1998	Outpatients	28.6376	77.2235	8	Frequent relapse + long latency	Frequent relapse + long latency, Old World	Old World	tropical	Old World, tropical
126_2271	No	NA	360	CQ	Chloroquine	600 mg d0 + 300 mg d1	900 mg	India	Wild - Dehli, India	P14	P14_126	126	1998	Adak et al, 1998	Outpatients	28.6376	77.2235	8	Frequent relapse + long latency	Frequent relapse + long latency, Old World	Old World	tropical	Old World, tropical
126_2272	No	NA	360	CQ	Chloroquine	600 mg d0 + 300 mg d1	900 mg	India	Wild - Dehli, India	P14	P14_126	126	1998	Adak et al, 1998	Outpatients	28.6376	77.2235	8	Frequent relapse + long latency	Frequent relapse + long latency, Old World	Old World	tropical	Old World, tropical
126_2273	No	NA	360	CQ	Chloroquine	600 mg d0 + 300 mg d1	900 mg	India	Wild - Dehli, India	P14	P14_126	126	1998	Adak et al, 1998	Outpatients	28.6376	77.2235	8	Frequent relapse + long latency	Frequent relapse + long latency, Old World	Old World	tropical	Old World, tropical
126_2274	No	NA	360	CQ	Chloroquine	600 mg d0 + 300 mg d1	900 mg	India	Wild - Dehli, India	P14	P14_126	126	1998	Adak et al, 1998	Outpatients	28.6376	77.2235	8	Frequent relapse + long latency	Frequent relapse + long latency, Old World	Old World	tropical	Old World, tropical
126_2275	No	NA	360	CQ	Chloroquine	600 mg d0 + 300 mg d1	900 mg	India	Wild - Dehli, India	P14	P14_126	126	1998	Adak et al, 1998	Outpatients	28.6376	77.2235	8	Frequent relapse + long latency	Frequent relapse + long latency, Old World	Old World	tropical	Old World, tropical
126_2276	No	NA	360	CQ	Chloroquine	600 mg d0 + 300 mg d1	900 mg	India	Wild - Dehli, India	P14	P14_126	126	1998	Adak et al, 1998	Outpatients	28.6376	77.2235	8	Frequent relapse + long latency	Frequent relapse + long latency, Old World	Old World	tropical	Old World, tropical
126_2277	No	NA	360	CQ	Chloroquine	600 mg d0 + 300 mg d1	900 mg	India	Wild - Dehli, India	P14	P14_126	126	1998	Adak et al, 1998	Outpatients	28.6376	77.2235	8	Frequent relapse + long latency	Frequent relapse + long latency, Old World	Old World	tropical	Old World, tropical
126_2278	No	NA	360	CQ	Chloroquine	600 mg d0 + 300 mg d1	900 mg	India	Wild - Dehli, India	P14	P14_126	126	1998	Adak et al, 1998	Outpatients	28.6376	77.2235	8	Frequent relapse + long latency	Frequent relapse + long latency, Old World	Old World	tropical	Old World, tropical
126_2279	No	NA	360	CQ	Chloroquine	600 mg d0 + 300 mg d1	900 mg	India	Wild - Dehli, India	P14	P14_126	126	1998	Adak et al, 1998	Outpatients	28.6376	77.2235	8	Frequent relapse + long latency	Frequent relapse + long latency, Old World	Old World	tropical	Old World, tropical
126_228	Yes	120	120	CQ	Chloroquine	600 mg d0 + 300 mg d1	900 mg	India	Wild - Dehli, India	P14	P14_126	126	1998	Adak et al, 1998	Outpatients	28.6376	77.2235	8	Frequent relapse + long latency	Frequent relapse + long latency, Old World	Old World	tropical	Old World, tropical
126_2280	No	NA	360	CQ	Chloroquine	600 mg d0 + 300 mg d1	900 mg	India	Wild - Dehli, India	P14	P14_126	126	1998	Adak et al, 1998	Outpatients	28.6376	77.2235	8	Frequent relapse + long latency	Frequent relapse + long latency, Old World	Old World	tropical	Old World, tropical
126_2281	No	NA	360	CQ	Chloroquine	600 mg d0 + 300 mg d1	900 mg	India	Wild - Dehli, India	P14	P14_126	126	1998	Adak et al, 1998	Outpatients	28.6376	77.2235	8	Frequent relapse + long latency	Frequent relapse + long latency, Old World	Old World	tropical	Old World, tropical
126_2282	No	NA	360	CQ	Chloroquine	600 mg d0 + 300 mg d1	900 mg	India	Wild - Dehli, India	P14	P14_126	126	1998	Adak et al, 1998	Outpatients	28.6376	77.2235	8	Frequent relapse + long latency	Frequent relapse + long latency, Old World	Old World	tropical	Old World, tropical
126_2283	No	NA	360	CQ	Chloroquine	600 mg d0 + 300 mg d1	900 mg	India	Wild - Dehli, India	P14	P14_126	126	1998	Adak et al, 1998	Outpatients	28.6376	77.2235	8	Frequent relapse + long latency	Frequent relapse + long latency, Old World	Old World	tropical	Old World, tropical
126_2284	No	NA	360	CQ	Chloroquine	600 mg d0 + 300 mg d1	900 mg	India	Wild - Dehli, India	P14	P14_126	126	1998	Adak et al, 1998	Outpatients	28.6376	77.2235	8	Frequent relapse + long latency	Frequent relapse + long latency, Old World	Old World	tropical	Old World, tropical
126_2285	No	NA	360	CQ	Chloroquine	600 mg d0 + 300 mg d1	900 mg	India	Wild - Dehli, India	P14	P14_126	126	1998	Adak et al, 1998	Outpatients	28.6376	77.2235	8	Frequent relapse + long latency	Frequent relapse + long latency, Old World	Old World	tropical	Old World, tropical
126_2286	No	NA	360	CQ	Chloroquine	600 mg d0 + 300 mg d1	900 mg	India	Wild - Dehli, India	P14	P14_126	126	1998	Adak et al, 1998	Outpatients	28.6376	77.2235	8	Frequent relapse + long latency	Frequent relapse + long latency, Old World	Old World	tropical	Old World, tropical
126_2287	No	NA	360	CQ	Chloroquine	600 mg d0 + 300 mg d1	900 mg	India	Wild - Dehli, India	P14	P14_126	126	1998	Adak et al, 1998	Outpatients	28.6376	77.2235	8	Frequent relapse + long latency	Frequent relapse + long latency, Old World	Old World	tropical	Old World, tropical
126_2288	No	NA	360	CQ	Chloroquine	600 mg d0 + 300 mg d1	900 mg	India	Wild - Dehli, India	P14	P14_126	126	1998	Adak et al, 1998	Outpatients	28.6376	77.2235	8	Frequent relapse + long latency	Frequent relapse + long latency, Old World	Old World	tropical	Old World, tropical
126_2289	No	NA	360	CQ	Chloroquine	600 mg d0 + 300 mg d1	900 mg	India	Wild - Dehli, India	P14	P14_126	126	1998	Adak et al, 1998	Outpatients	28.6376	77.2235	8	Frequent relapse + long latency	Frequent relapse + long latency, Old World	Old World	tropical	Old World, tropical
126_229	Yes	120	120	CQ	Chloroquine	600 mg d0 + 300 mg d1	900 mg	India	Wild - Dehli, India	P14	P14_126	126	1998	Adak et al, 1998	Outpatients	28.6376	77.2235	8	Frequent relapse + long latency	Frequent relapse + long latency, Old World	Old World	tropical	Old World, tropical
126_2290	No	NA	360	CQ	Chloroquine	600 mg d0 + 300 mg d1	900 mg	India	Wild - Dehli, India	P14	P14_126	126	1998	Adak et al, 1998	Outpatients	28.6376	77.2235	8	Frequent relapse + long latency	Frequent relapse + long latency, Old World	Old World	tropical	Old World, tropical
126_2291	No	NA	360	CQ	Chloroquine	600 mg d0 + 300 mg d1	900 mg	India	Wild - Dehli, India	P14	P14_126	126	1998	Adak et al, 1998	Outpatients	28.6376	77.2235	8	Frequent relapse + long latency	Frequent relapse + long latency, Old World	Old World	tropical	Old World, tropical
126_2292	No	NA	360	CQ	Chloroquine	600 mg d0 + 300 mg d1	900 mg	India	Wild - Dehli, India	P14	P14_126	126	1998	Adak et al, 1998	Outpatients	28.6376	77.2235	8	Frequent relapse + long latency	Frequent relapse + long latency, Old World	Old World	tropical	Old World, tropical
126_2293	No	NA	360	CQ	Chloroquine	600 mg d0 + 300 mg d1	900 mg	India	Wild - Dehli, India	P14	P14_126	126	1998	Adak et al, 1998	Outpatients	28.6376	77.2235	8	Frequent relapse + long latency	Frequent relapse + long latency, Old World	Old World	tropical	Old World, tropical
126_2294	No	NA	360	CQ	Chloroquine	600 mg d0 + 300 mg d1	900 mg	India	Wild - Dehli, India	P14	P14_126	126	1998	Adak et al, 1998	Outpatients	28.6376	77.2235	8	Frequent relapse + long latency	Frequent relapse + long latency, Old World	Old World	tropical	Old World, tropical
126_2295	No	NA	360	CQ	Chloroquine	600 mg d0 + 300 mg d1	900 mg	India	Wild - Dehli, India	P14	P14_126	126	1998	Adak et al, 1998	Outpatients	28.6376	77.2235	8	Frequent relapse + long latency	Frequent relapse + long latency, Old World	Old World	tropical	Old World, tropical
126_2296	No	NA	360	CQ	Chloroquine	600 mg d0 + 300 mg d1	900 mg	India	Wild - Dehli, India	P14	P14_126	126	1998	Adak et al, 1998	Outpatients	28.6376	77.2235	8	Frequent relapse + long latency	Frequent relapse + long latency, Old World	Old World	tropical	Old World, tropical
126_2297	No	NA	360	CQ	Chloroquine	600 mg d0 + 300 mg d1	900 mg	India	Wild - Dehli, India	P14	P14_126	126	1998	Adak et al, 1998	Outpatients	28.6376	77.2235	8	Frequent relapse + long latency	Frequent relapse + long latency, Old World	Old World	tropical	Old World, tropical
126_2298	No	NA	360	CQ	Chloroquine	600 mg d0 + 300 mg d1	900 mg	India	Wild - Dehli, India	P14	P14_126	126	1998	Adak et al, 1998	Outpatients	28.6376	77.2235	8	Frequent relapse + long latency	Frequent relapse + long latency, Old World	Old World	tropical	Old World, tropical
126_2299	No	NA	360	CQ	Chloroquine	600 mg d0 + 300 mg d1	900 mg	India	Wild - Dehli, India	P14	P14_126	126	1998	Adak et al, 1998	Outpatients	28.6376	77.2235	8	Frequent relapse + long latency	Frequent relapse + long latency, Old World	Old World	tropical	Old World, tropical
126_23	Yes	30	30	CQ	Chloroquine	600 mg d0 + 300 mg d1	900 mg	India	Wild - Dehli, India	P14	P14_126	126	1998	Adak et al, 1998	Outpatients	28.6376	77.2235	8	Frequent relapse + long latency	Frequent relapse + long latency, Old World	Old World	tropical	Old World, tropical
126_230	Yes	120	120	CQ	Chloroquine	600 mg d0 + 300 mg d1	900 mg	India	Wild - Dehli, India	P14	P14_126	126	1998	Adak et al, 1998	Outpatients	28.6376	77.2235	8	Frequent relapse + long latency	Frequent relapse + long latency, Old World	Old World	tropical	Old World, tropical
126_2300	No	NA	360	CQ	Chloroquine	600 mg d0 + 300 mg d1	900 mg	India	Wild - Dehli, India	P14	P14_126	126	1998	Adak et al, 1998	Outpatients	28.6376	77.2235	8	Frequent relapse + long latency	Frequent relapse + long latency, Old World	Old World	tropical	Old World, tropical
126_2301	No	NA	360	CQ	Chloroquine	600 mg d0 + 300 mg d1	900 mg	India	Wild - Dehli, India	P14	P14_126	126	1998	Adak et al, 1998	Outpatients	28.6376	77.2235	8	Frequent relapse + long latency	Frequent relapse + long latency, Old World	Old World	tropical	Old World, tropical
126_2302	No	NA	360	CQ	Chloroquine	600 mg d0 + 300 mg d1	900 mg	India	Wild - Dehli, India	P14	P14_126	126	1998	Adak et al, 1998	Outpatients	28.6376	77.2235	8	Frequent relapse + long latency	Frequent relapse + long latency, Old World	Old World	tropical	Old World, tropical
126_2303	No	NA	360	CQ	Chloroquine	600 mg d0 + 300 mg d1	900 mg	India	Wild - Dehli, India	P14	P14_126	126	1998	Adak et al, 1998	Outpatients	28.6376	77.2235	8	Frequent relapse + long latency	Frequent relapse + long latency, Old World	Old World	tropical	Old World, tropical
126_2304	No	NA	360	CQ	Chloroquine	600 mg d0 + 300 mg d1	900 mg	India	Wild - Dehli, India	P14	P14_126	126	1998	Adak et al, 1998	Outpatients	28.6376	77.2235	8	Frequent relapse + long latency	Frequent relapse + long latency, Old World	Old World	tropical	Old World, tropical
126_2305	No	NA	360	CQ	Chloroquine	600 mg d0 + 300 mg d1	900 mg	India	Wild - Dehli, India	P14	P14_126	126	1998	Adak et al, 1998	Outpatients	28.6376	77.2235	8	Frequent relapse + long latency	Frequent relapse + long latency, Old World	Old World	tropical	Old World, tropical
[truncated: 28,589 more rows]

## Sheet: Legend
Column	Description
PatientID	Patient identifier
Relapse	Yes or no if patient relapse
RelapseDay	Day of observed relapse or recurrence
[truncated: 21 more rows]
